# Supplementary material for: Machine learning empowers phosphoproteome prediction in cancers
Source: Oxford University Press journal article supplement (doi:10.1093/bioinformatics/btz639), 2019-08-12
Supplement: btz639_supplementary_data.zip [file btz639_supplementary_data.zip]

Archive with 3 entries (3 files):
- top_breast.tsv
- top_ovary.tsv
- supplementary_information.pdf
