# Supplementary material for: Machine learning empowers phosphoproteome prediction in cancers
Source: Oxford University Press journal article supplement (doi:10.1093/bioinformatics/btz639), 2019-08-12
Supplement: btz639_supplementary_data.zip [file btz639_supplementary_data.zip › top_breast.tsv]

0.000471488513733914	AAK1,AP2A1,URGCP,CDH1	CARTPT,SPAST,PSMD8,LSP1,CHGB,RPL10A,BPIFB1,INPP5D,WASF2,ADPRH,FBXO18,RETREG3,CGN,FNBP1,AAK1,FAM103A1,TANGO2,ASAP3,GLIPR2,SNRPE,TTPAL,AUH,WASHC4,GNL1,TBCEL,STK38,ROBO1,NFKBIE,DVL2,SNRPN,PHC2,AKR1B1,DRAP1,ERP29,MRPL21,MRTO4,HIST2H2AB,PREPL,NEO1,APOD,CIT,H3F3A,SGTB,PES1,BPI,AP2A1,ARFGAP3,GRB2,PDK2,ELF3,SLC25A36,DBNL,C12orf4,SF3B1,SEC23A,FASTKD2,PRKAA1,SULF1,ZRSR2,GSK3A,RPL27A,ADSL,FH,PPDPF,NOL4L,LAR…
0.00733784765958348	AR,DDX56,KRI1,PAWR	MPC2,EXD2,PFKFB2,PALM,CAMKK2,SPEN,SORL1,VTCN1,RBX1,TJP2,GTF2E2,OTULIN,AP4E1,AUH,ZNHIT6,NEDD8,FAM129B,ATP2B1,ZFP36L2,TFEB,USP8,AR,RAC1,ST5,HAUS7,RAB32,FGB,CAMK2D,NAPG,HSD17B7,TRAPPC5,NSRP1,MYO5B,EAPP,TSPAN15,KANK2,IPO5,LYPLA2,DDX56,LOC107984056,CLIP1,PROM1,AIDA,SYNJ2BP-COX16,C8G,PDZK1,RSF1,RPTOR,IFT122,MINOS1-NBL1,USP4,MRM3,MCU,DNAJC3,AK2,SH2D4A,CNP,THUMPD1,RNF113A,DHRS7,KRI1,CISD1,SPINT1,PAWR,PAR…
0.00733784765958348	MPHOSPH10,NOL6,CHEK2,PCBD2	MPHOSPH10,MAN2A1,TWISTNB,SF3B1,PLRG1,POLR2H,MAN1A1,NAT10,SLC4A1AP,ZC3H15,RRP8,NOP14,SF3B2,PPID,SNW1,ADAR,UTP18,MBD3,PABPC4,CHD4,PPM1G,NUP50,ZNRD1,HYI,KIN,SLIT3,TRMT61B,PFDN2,LTV1,RAB35,ETV6,HSPA12B,PRPF3,SART1,PDS5A,DDX50,THOC1,MRPS2,SDF2L1,RRP1,CWC22,DDX47,NOL6,NAA10,HLTF,DDX17,ANKRD16,CACNA2D1,NAA15,GTF3C2,TRMT1,EPS8,ABCE1,MYBBP1A,PSMG2,UTP4,U2SURP,NDUFA2,RAB2B,NDUFC2,DRAP1,SURF6,CHEK2,CBX3,COM…
0.00370367328158468	PNN,SMC1A,SARNP,ZC3H18,EPB41L3,PRPF40A	PNN,ZFP91,GATAD2B,RPS26,SMC1A,YBX1,MARK2,SARNP,SRRT,TBCA,CDKN2AIP,RPS29,RPS11,FNBP4,MAEA,RABGAP1L,NDUFA7,PPIL1,ATXN2L,PCNP,IK,RBM14,INTS12,BOD1L1,CWC22,HGS,RSRC2,ELOA,SUMO3,NOLC1,GFER,ZC3H18,COA6,GSPT1,GIPC1,SP1,TCOF1,CENPB,BCLAF1,RRAGC,PLCB3,ESD,USP14,KMT2D,CNOT11,SAMD1,TIMP1,EPB41L3,RBM6,SRSF2,NES,ELMOD2,GSTP1,NOTCH3,UBA1,PPP6R1,MRPS12,TOR1AIP2,ENSA,RABAC1,ZBTB20,EXOC3,YWHAG,SLC4A2,GRHL2,TBL1XR…
0.000698846187048755	PNN,SMC1A,PRPF6,SAP18,SNW1,SARNP,ACIN1	SUMO3,GATAD2B,RBM6,PNN,ZFP91,CLTB,MAEA,NDUFA7,PCNP,UBL5,ATXN2L,HDDC3,TBCA,ASNA1,MARCKS,ELOA,PPP1R11,FCER1G,SRFBP1,HGS,BOD1L1,PTBP1,RPS26,RPS11,SMC1A,RBMX,YLPM1,SRSF3,RPS29,TCOF1,BUD13,RBBP6,WDR33,ZNF609,SETX,TMEM189-UBE2V1,SH3GLB1,SMARCA4,MIB1,RPL35A,PRPF6,SUMO1,EIF1B,FER,PIKFYVE,CASC3,PMPCA,CWC22,NOP14,GFM2,NOLC1,ZNF787,JUP,ECHS1,NUDT16,RAI14,EMSY,USP36,SEPT10,TRAFD1,SAP18,EIF2B2,DCLK1,MED16,PPM…
0.000113796260075936	PNN,SMC1A,SAP18,SMU1,SUZ12,EZH2,PCBP1,SAFB	ZFP91,PNN,GATAD2B,RBM14,SMC1A,SRRT,ARID1A,RPS26,PRRC2C,SERBP1,MAEA,PCNP,MARK2,ZNF787,BOD1L1,TCOF1,SFPQ,SMAD5,FNBP4,RSRC2,RPS29,CDKN2AIP,ZC3H14,SRSF7,UBL5,RPS11,WDR33,RCC2,ZYG11B,RRAGC,SAP18,SETX,NDUFA7,FEN1,ZNF609,ZNF385A,ACTL6A,SMU1,SMARCC1,EDC3,ZCCHC3,TRIR,MBD1,GPX4,USP36,SUZ12,KDM5A,SUMF1,YBX1,UBE2O,PSMD14,MRPL32,MTA2,APCS,FBXO28,NCL,RABGAP1L,RAE1,SMG9,RBBP6,EZR,PRPF19,ZC3H7A,SYNPO2,MINDY3,DDR…
0.00370367328158468	SAFB,SAP18,ZC3H18,THRAP3,SNW1,SUB1	NOLC1,ZC3H13,SAFB,EIF4B,SLTM,SAP18,MRPL30,ZNF330,EDF1,HMGN2,ATPIF1,BCL2L13,RPS10,ZC3H18,PCNP,CHMP2B,ZMAT2,HDGFL2,SMAD5,RBM6,ACTBL2,GABPB1,THRAP3,USP11,PPHLN1,MAP3K7,KRT80,NR2C2,PKP4,TUFT1,CHKA,CCDC50,SFPQ,HOMER2,SRSF2,BOD1L1,GPATCH8,ZFP36L1,BLOC1S5,PNMT,COL4A1,CARTPT,CHMP1B,PEBP1,ATP5E,NPM3,RPS6KA5,CHCHD3,NOL8,XYLB,MAPKAPK2,MUCL1,SAR1B,CHCHD6,TCEAL1,NMT2,POLG2,STX16,EIF3A,SNW1,NEDD4L,MAEA,DHRS2,A…
0.000113796260075936	PRPF6,PNN,PCBD1,SAFB,ACIN1,SON,EZH2,HNRNPA1	TTR,RNF40,SLAIN2,DPH5,POLR2A,SNRNP70,CLTB,GATAD2A,PSMD9,MRPS18A,PRPF6,TXN2,PRDX5,PNN,SETD2,XRCC1,MEPCE,RSRC2,INTS6,USF1,TPR,AP5M1,PCBD1,ZFAND6,ATRX,CELF1,SMIM12,ILKAP,RALY,LRPAP1,DSCR3,RUVBL1,GTF2F1,SNX17,SERPINA10,EVI5,EHD3,IRF2,SAFB,ACIN1,APOH,GCC1,EHMT1,SON,HNRNPL,ELOC,RREB1,ATXN2L,FBXO28,GGT5,MIB1,LSM3,BOD1L1,LARP7,POT1,MRPS12,CRKL,RANBP2,TXNRD1,NFKBIB,LSM1,DNAJC3,EVL,ACTN4,MZT1,TFAP2A,STK10,…
0.000698846187048755	SON,SRP14,PRPF6,LUC7L2,BET1,BOP1,SNW1	SUMO1,RPL18A,ANAPC2,DYNLRB1,TBPL1,SEPT9,WASF2,SON,ATP6AP2,ARVCF,SRP14,ZC3HAV1,HDAC4,PSMA1,HIST2H2AB,NONO,SAP30,SOAT1,FAM177A1,MED8,PRPF6,RREB1,INO80C,NENF,VAMP8,MAD1L1,HOOK2,POFUT1,ATG101,MED6,EIF3C,TTC9C,RPL32,ROCK1,CHMP4B,BUD31,MRPS31,ELL,LUC7L2,RSRC2,ACTA1,MAF1,EXOSC6,S100A10,S100B,BRAF,ATP5D,ZC3H15,RPS6KA4,RBM22,USP47,SRP9,TRA2B,CARTPT,LMAN1,LAMP2,ACOT13,INTS9,ARL8B,MYADM,IGLL1,SART3,PDF,SLC2…
0.00370367328158468	SRP14,SNRPA1,PNN,PRPF6,THRAP3,SNW1	RBMX,POLR2A,AGA,ELOC,SRRT,BPIFB1,CSAD,CAP2,AIFM2,SMG8,BBX,ADH5,BBS7,SRP14,SMARCA4,PDS5A,SNRPA1,FUS,UBE2V2,CHMP1A,ZNF638,ILF2,RPS19,SAP30,PCYOX1,INTS12,PHF6,SERPIND1,ILKAP,PDAP1,MRPS2,AKAP12,C6,SSU72,HSPA12A,PLCD1,GPS2,SYMPK,CALD1,MFGE8,SLIT3,GSTM5,LANCL1,MYL9,PDLIM3,CTNNBL1,RBP7,COL4A2,OLFML1,NAA10,CSTF2T,DUSP3,LIMS2,TG,PABPC4,SZRD1,PNN,VAMP3,PRPF6,MED8,DYNLT3,TTR,THRAP3,XDH,BIN1,ALDH1A3,ADH1B,MO…
0.000113796260075936	SMU1,PRPF6,ACIN1,ELAVL1,U2AF1,SSRP1,LUC7L2,SRP14	DPY30,RANBP2,SMU1,ELOC,UBE2V2,CHERP,CPSF4,BUD31,NONO,POLR2F,HDAC4,XRCC1,PRPF6,ANAPC2,C1orf35,RPL30,AGT,SRSF9,CBLL1,GTF2E1,RPS5,NHP2,CTNNBL1,CD209,SRP72,IFT80,CCAR1,ACIN1,ELAVL1,SSU72,CD99L2,U2AF1,KDM6A,SSRP1,RPS2,ILKAP,LUC7L2,NID1,RBM10,UTP6,FAM96A,URGCP,GATAD2A,CPB1,PUM1,SRP14,RBM22,EIF3C,NCBP3,SNRPD2,YTHDC1,OAF,CSAD,LUC7L3,USP3,DNMT1,HAUS5,SRRT,STIP1,NCBP2,MED8,FAM136A,BOD1L1,SERPINA4,MED22,CNP…
0.00370367328158468	THRAP3,ACIN1,SAFB,PRPF6,PNN,CHD4	THRAP3,PNISR,ACIN1,SAFB,PRPF6,ATRX,WDR33,MINK1,PNN,FAM136A,CTDP1,SCAF11,NCBP3,PLRG1,RBBP6,MFAP1,ZNF598,TXLNA,BCLAF1,CUL4B,ZFAND6,GPRC5A,HEXA,NDUFA4,NSMCE3,LUC7L3,POLR2J,CHD4,BRD2,CIAO1,ZFP91,PGLYRP2,KDM6A,MYL6,GPATCH8,CNOT11,SERPINA10,SMARCA4,MRPS5,NSMCE1,RTF1,GDAP2,SCAF1,CCDC9,THOC7,KLHL36,POLR2A,KIAA1143,GPX1,PRDX2,NFX1,C19orf47,GPR107,EXD2,CDK5RAP3,ARPP19,PRG4,C14orf2,CLSTN2,ENPP2,COPS7B,CRYBG…
0.00370367328158468	PNN,SMC1A,SARNP,ZC3H18,EPB41L3,PRPF40A	PNN,ZFP91,GATAD2B,RPS26,SMC1A,YBX1,MARK2,SARNP,SRRT,TBCA,CDKN2AIP,RPS29,RPS11,FNBP4,MAEA,RABGAP1L,NDUFA7,PPIL1,ATXN2L,PCNP,IK,RBM14,INTS12,BOD1L1,CWC22,HGS,RSRC2,ELOA,SUMO3,NOLC1,GFER,ZC3H18,COA6,GSPT1,GIPC1,SP1,TCOF1,CENPB,BCLAF1,RRAGC,PLCB3,ESD,USP14,KMT2D,CNOT11,SAMD1,TIMP1,EPB41L3,RBM6,SRSF2,NES,ELMOD2,GSTP1,NOTCH3,UBA1,PPP6R1,MRPS12,TOR1AIP2,ENSA,RABAC1,ZBTB20,EXOC3,YWHAG,SLC4A2,GRHL2,TBL1XR…
0.000698846187048755	PNN,SMC1A,PRPF6,SAP18,SNW1,SARNP,ACIN1	SUMO3,GATAD2B,RBM6,PNN,ZFP91,CLTB,MAEA,NDUFA7,PCNP,UBL5,ATXN2L,HDDC3,TBCA,ASNA1,MARCKS,ELOA,PPP1R11,FCER1G,SRFBP1,HGS,BOD1L1,PTBP1,RPS26,RPS11,SMC1A,RBMX,YLPM1,SRSF3,RPS29,TCOF1,BUD13,RBBP6,WDR33,ZNF609,SETX,TMEM189-UBE2V1,SH3GLB1,SMARCA4,MIB1,RPL35A,PRPF6,SUMO1,EIF1B,FER,PIKFYVE,CASC3,PMPCA,CWC22,NOP14,GFM2,NOLC1,ZNF787,JUP,ECHS1,NUDT16,RAI14,EMSY,USP36,SEPT10,TRAFD1,SAP18,EIF2B2,DCLK1,MED16,PPM…
0.000113796260075936	PNN,SMC1A,SAP18,SMU1,SUZ12,EZH2,PCBP1,SAFB	ZFP91,PNN,GATAD2B,RBM14,SMC1A,SRRT,ARID1A,RPS26,PRRC2C,SERBP1,MAEA,PCNP,MARK2,ZNF787,BOD1L1,TCOF1,SFPQ,SMAD5,FNBP4,RSRC2,RPS29,CDKN2AIP,ZC3H14,SRSF7,UBL5,RPS11,WDR33,RCC2,ZYG11B,RRAGC,SAP18,SETX,NDUFA7,FEN1,ZNF609,ZNF385A,ACTL6A,SMU1,SMARCC1,EDC3,ZCCHC3,TRIR,MBD1,GPX4,USP36,SUZ12,KDM5A,SUMF1,YBX1,UBE2O,PSMD14,MRPL32,MTA2,APCS,FBXO28,NCL,RABGAP1L,RAE1,SMG9,RBBP6,EZR,PRPF19,ZC3H7A,SYNPO2,MINDY3,DDR…
0.00370367328158468	SAFB,SAP18,ZC3H18,THRAP3,SNW1,SUB1	NOLC1,ZC3H13,SAFB,EIF4B,SLTM,SAP18,MRPL30,ZNF330,EDF1,HMGN2,ATPIF1,BCL2L13,RPS10,ZC3H18,PCNP,CHMP2B,ZMAT2,HDGFL2,SMAD5,RBM6,ACTBL2,GABPB1,THRAP3,USP11,PPHLN1,MAP3K7,KRT80,NR2C2,PKP4,TUFT1,CHKA,CCDC50,SFPQ,HOMER2,SRSF2,BOD1L1,GPATCH8,ZFP36L1,BLOC1S5,PNMT,COL4A1,CARTPT,CHMP1B,PEBP1,ATP5E,NPM3,RPS6KA5,CHCHD3,NOL8,XYLB,MAPKAPK2,MUCL1,SAR1B,CHCHD6,TCEAL1,NMT2,POLG2,STX16,EIF3A,SNW1,NEDD4L,MAEA,DHRS2,A…
0.000698846187048755	SON,SRP14,PRPF6,LUC7L2,BET1,BOP1,SNW1	SUMO1,RPL18A,ANAPC2,DYNLRB1,TBPL1,SEPT9,WASF2,SON,ATP6AP2,ARVCF,SRP14,ZC3HAV1,HDAC4,PSMA1,HIST2H2AB,NONO,SAP30,SOAT1,FAM177A1,MED8,PRPF6,RREB1,INO80C,NENF,VAMP8,MAD1L1,HOOK2,POFUT1,ATG101,MED6,EIF3C,TTC9C,RPL32,ROCK1,CHMP4B,BUD31,MRPS31,ELL,LUC7L2,RSRC2,ACTA1,MAF1,EXOSC6,S100A10,S100B,BRAF,ATP5D,ZC3H15,RPS6KA4,RBM22,USP47,SRP9,TRA2B,CARTPT,LMAN1,LAMP2,ACOT13,INTS9,ARL8B,MYADM,IGLL1,SART3,PDF,SLC2…
0.00370367328158468	SRP14,SNRPA1,PNN,PRPF6,THRAP3,SNW1	RBMX,POLR2A,AGA,ELOC,SRRT,BPIFB1,CSAD,CAP2,AIFM2,SMG8,BBX,ADH5,BBS7,SRP14,SMARCA4,PDS5A,SNRPA1,FUS,UBE2V2,CHMP1A,ZNF638,ILF2,RPS19,SAP30,PCYOX1,INTS12,PHF6,SERPIND1,ILKAP,PDAP1,MRPS2,AKAP12,C6,SSU72,HSPA12A,PLCD1,GPS2,SYMPK,CALD1,MFGE8,SLIT3,GSTM5,LANCL1,MYL9,PDLIM3,CTNNBL1,RBP7,COL4A2,OLFML1,NAA10,CSTF2T,DUSP3,LIMS2,TG,PABPC4,SZRD1,PNN,VAMP3,PRPF6,MED8,DYNLT3,TTR,THRAP3,XDH,BIN1,ALDH1A3,ADH1B,MO…
0.000113796260075936	SMU1,PRPF6,ACIN1,ELAVL1,U2AF1,SSRP1,LUC7L2,SRP14	DPY30,RANBP2,SMU1,ELOC,UBE2V2,CHERP,CPSF4,BUD31,NONO,POLR2F,HDAC4,XRCC1,PRPF6,ANAPC2,C1orf35,RPL30,AGT,SRSF9,CBLL1,GTF2E1,RPS5,NHP2,CTNNBL1,CD209,SRP72,IFT80,CCAR1,ACIN1,ELAVL1,SSU72,CD99L2,U2AF1,KDM6A,SSRP1,RPS2,ILKAP,LUC7L2,NID1,RBM10,UTP6,FAM96A,URGCP,GATAD2A,CPB1,PUM1,SRP14,RBM22,EIF3C,NCBP3,SNRPD2,YTHDC1,OAF,CSAD,LUC7L3,USP3,DNMT1,HAUS5,SRRT,STIP1,NCBP2,MED8,FAM136A,BOD1L1,SERPINA4,MED22,CNP…
0.00370367328158468	THRAP3,ACIN1,SAFB,PRPF6,PNN,CHD4	THRAP3,PNISR,ACIN1,SAFB,PRPF6,ATRX,WDR33,MINK1,PNN,FAM136A,CTDP1,SCAF11,NCBP3,PLRG1,RBBP6,MFAP1,ZNF598,TXLNA,BCLAF1,CUL4B,ZFAND6,GPRC5A,HEXA,NDUFA4,NSMCE3,LUC7L3,POLR2J,CHD4,BRD2,CIAO1,ZFP91,PGLYRP2,KDM6A,MYL6,GPATCH8,CNOT11,SERPINA10,SMARCA4,MRPS5,NSMCE1,RTF1,GDAP2,SCAF1,CCDC9,THOC7,KLHL36,POLR2A,KIAA1143,GPX1,PRDX2,NFX1,C19orf47,GPR107,EXD2,CDK5RAP3,ARPP19,PRG4,C14orf2,CLSTN2,ENPP2,COPS7B,CRYBG…
0.00275266756556841	MYH9,PALLD,AMBRA1,CSRP1,OBSL1,CALD1	MYH9,PGRMC2,BYSL,MBOAT7,SYNE1,MGMT,ZC3H6,KARS,GPAA1,URGCP,SORT1,GMPPB,USO1,CDC26,DROSHA,VPS28,ADAM17,BAX,THBS2,NQO2,RAVER1,CD44,CDC42EP4,TMCO4,TMED9,PJA2,VMAC,CASP6,SPCS2,PALLD,ANKS1A,BMP1,RIN2,METTL14,CENPB,ATP13A1,HTRA3,GIMAP4,HAUS2,AMBRA1,CUX1,CSRP1,VDAC2,UTP15,ACTR1B,POP1,ERF,COASY,SEPHS1,SLMAP,ETFRF1,OSBPL10,UBE2F,DLG1,DIS3,BNIP2,PUM2,RICTOR,FRMD6,AP2M1,DENND2D,FBXW8,EXOC5,SEC61A1,FOCAD,SELE…
0.00599116833074609	SMARCA4,TPM3,RPA2,CDKN2AIP	BLOC1S5,SRRT,FPGS,PSMB4,ZFP91,PPP1R12A,MEN1,PNN,MARK3,COX17,PCNP,ERC1,ZNF652,SMARCA4,COPE,CHMP4B,SETD2,FAF1,ACTB,ZCCHC6,ZC3H18,UQCRQ,COX5A,SLK,TUFT1,TPM3,SP1,HSPA8,UTP3,BCLAF1,KANK3,MYL6,DPM3,SH3BGRL3,EIF4B,REEP5,SEPHS1,RBBP5,CHMP2B,KIAA1143,NUDT16,AGAP1,NDUFS6,BUD13,SP3,RPA2,CDKN2AIP,RIPK2,NDUFA11,MED22,XRCC1,CHMP4A,MCUR1,NEDD8,ARL6IP1,RACK1,CBLL1,GATAD2B,TRIM14,RAP1A,ELOA,NSRP1,PPIC,PGAM1,CHAMP…
0.00727692874448481	MLLT1,ARRB2,EAF1	SMARCAL1,ANK2,LRIF1,SYNC,SBF2,TRIP11,ADPRH,ACSF3,PPIG,FASTKD2,CDK16,NT5DC1,CDK5RAP1,YOD1,MED1,SCAMP4,IRF5,AKAP8L,RELA,ERAP2,PDGFRB,ITIH3,AP1G1,MYO18A,MLLT1,MED27,ARRB2,CCDC58,C1orf174,IRF6,PLTP,FOXK2,ANKRD52,CMPK1,HTATIP2,TMCO4,EAF1,TAF5,EMD,HECTD3,FGD4,PHRF1,GDAP1,DFFB,VARS,CCT4,KRAS,LATS1,ATAD3A,TRIM47,CMC4,TECPR1,CBX4,COTL1,XRCC4,FDFT1,DNAJC11,ZC3H14,GCLM,CDK11B,SAMM50,FUT8,TUBB2A,SMG1,FBXO11,…
0.00248070136350948	PIH1D1,HNRNPH1,PPT1,HNRNPDL,GALK2,HSPB1	PSMB3,PPIA,PTBP1,PGAM1,POLR2D,RPL29,PSMA2,PIH1D1,HNRNPH1,PPT1,ASNA1,POLR1C,HNRNPDL,IRF2,TARBP2,GABARAP,MARCKS,RGL2,NUBP2,DOHH,WDR77,NAA25,PSMA5,UQCR11,PRPF18,CCT2,FUNDC2,LUZP1,UBE2L6,RPS6KA4,CCDC93,POLR3H,ATRX,AP3M2,CCDC88A,ATP5D,ABHD14B,UPF2,EIF1,RPS15A,DTX2,MED18,RPL11,MFAP1,TSEN34,TBCA,ZFAND3,GPS2,ARL2,EIF1B,PEBP1,BUD13,SON,CABIN1,NDUFA11,CLINT1,FUT11,NUTF2,MRPL42,PSMB1,OTUD4,PTPRJ,RASSF5,PRPF…
0.00248070136350948	PIH1D1,HNRNPH1,PPT1,HNRNPDL,GALK2,HSPB1	PSMB3,PPIA,PTBP1,PGAM1,POLR2D,RPL29,PSMA2,PIH1D1,HNRNPH1,PPT1,ASNA1,POLR1C,HNRNPDL,IRF2,TARBP2,GABARAP,MARCKS,RGL2,NUBP2,DOHH,WDR77,NAA25,PSMA5,UQCR11,PRPF18,CCT2,FUNDC2,LUZP1,UBE2L6,RPS6KA4,CCDC93,POLR3H,ATRX,AP3M2,CCDC88A,ATP5D,ABHD14B,UPF2,EIF1,RPS15A,DTX2,MED18,RPL11,MFAP1,TSEN34,TBCA,ZFAND3,GPS2,ARL2,EIF1B,PEBP1,BUD13,SON,CABIN1,NDUFA11,CLINT1,FUT11,NUTF2,MRPL42,PSMB1,OTUD4,PTPRJ,RASSF5,PRPF…
0.00248070136350948	PIH1D1,HNRNPH1,PPT1,HNRNPDL,GALK2,HSPB1	PSMB3,PPIA,PTBP1,PGAM1,POLR2D,RPL29,PSMA2,PIH1D1,HNRNPH1,PPT1,ASNA1,POLR1C,HNRNPDL,IRF2,TARBP2,GABARAP,MARCKS,RGL2,NUBP2,DOHH,WDR77,NAA25,PSMA5,UQCR11,PRPF18,CCT2,FUNDC2,LUZP1,UBE2L6,RPS6KA4,CCDC93,POLR3H,ATRX,AP3M2,CCDC88A,ATP5D,ABHD14B,UPF2,EIF1,RPS15A,DTX2,MED18,RPL11,MFAP1,TSEN34,TBCA,ZFAND3,GPS2,ARL2,EIF1B,PEBP1,BUD13,SON,CABIN1,NDUFA11,CLINT1,FUT11,NUTF2,MRPL42,PSMB1,OTUD4,PTPRJ,RASSF5,PRPF…
0.00248070136350948	PIH1D1,HNRNPH1,PPT1,HNRNPDL,GALK2,HSPB1	PSMB3,PPIA,PTBP1,PGAM1,POLR2D,RPL29,PSMA2,PIH1D1,HNRNPH1,PPT1,ASNA1,POLR1C,HNRNPDL,IRF2,TARBP2,GABARAP,MARCKS,RGL2,NUBP2,DOHH,WDR77,NAA25,PSMA5,UQCR11,PRPF18,CCT2,FUNDC2,LUZP1,UBE2L6,RPS6KA4,CCDC93,POLR3H,ATRX,AP3M2,CCDC88A,ATP5D,ABHD14B,UPF2,EIF1,RPS15A,DTX2,MED18,RPL11,MFAP1,TSEN34,TBCA,ZFAND3,GPS2,ARL2,EIF1B,PEBP1,BUD13,SON,CABIN1,NDUFA11,CLINT1,FUT11,NUTF2,MRPL42,PSMB1,OTUD4,PTPRJ,RASSF5,PRPF…
0.00248070136350948	PPIP5K2,SUMO2,EZR,CDC42,PLEC,HIST1H4A	GSTO1,DOPEY2,MSRA,PKN1,DCP1B,GGA1,TNIP1,TNPO3,PPP4R2,CSTA,CUL2,PGM3,PFKL,IFT20,PPP4R3A,PPIP5K2,ANGPTL2,ARHGAP12,TULP3,MST1,CASP3,SRI,INPP4A,RAB11FIP1,MED23,NRP1,SUMO2,PDPR,FMNL3,ALOX5,MAOB,PGD,SYNPO,ALDH18A1,DHX37,VWA1,RPL27A,SPG21,EZR,CMAS,NEDD8,MTPAP,DOCK2,ZMYM2,CCAR2,CARTPT,OTULIN,STXBP3,VMAC,APOA4,MAPK3,MAP3K5,PLEKHF2,GNL1,ARMC8,SEH1L,RPLP2,RPP40,DYNLT3,TTC9C,ARHGEF17,PARVA,MORF4L1,CDC42,TLE1…
0.00248070136350948	EEF2,RUVBL1,POT1,OXCT1,EGFR,PMS1	TAF7,PALLD,C3orf38,COL11A1,FAM96A,CD2BP2,HNRNPA3,ZFYVE1,ARAF,PELO,NECTIN1,CAAP1,CDH5,SSU72,SNRPB2,SRP14,CAPG,LDAH,NRF1,ITGA6,DPYSL3,CARMIL1,ZGPAT,TP53RK,LIN54,EVPL,TTC13,PROS1,DHRS1,FAM111B,HPR,MXRA5,EEF2,TMED8,CNN2,RUVBL1,CWC15,ZC3H12A,SRSF4,KHSRP,RAPH1,CD99L2,TP53BP1,SUPT5H,DNLZ,VIPAS39,CDK11B,WWC3,RAB25,CLEC11A,POT1,ITGBL1,HYOU1,EPS15L1,PTPN14,TSPO,OXCT1,ALDOA,THUMPD2,FLII,VTN,RPS5,ENO3,MYO18A…
0.00883361204294807	AKAP12,AIFM1,SCO1	EFEMP2,MSRB3,STAT6,NRP2,RRAS,CARTPT,PDLIM2,AKAP12,GLIPR2,NEK1,LPP,FHL2,PDLIM4,RRS1,ZNF385A,COMP,SEPT7,WDR20,EPN1,DRG2,APOO,LAMA2,PM20D2,ACOT13,PPP2R3A,SCGN,FLNC,CAPN15,AP2S1,DHRS3,NOC3L,ATP5H,BBS2,SSBP1,PPM1A,GIT2,GAB1,PDK3,CDH11,CNOT9,RAB7A,STK17B,AFAP1,RAB28,PDHX,NEXN,KCTD12,PALMD,PTPN12,SNRPB2,DIP2B,WWC3,CSRP1,EFTUD2,GAS7,SHPK,MYO9B,TXNRD2,KMT2A,DCTN5,SLIRP,HSP90AB1,AGO3,RGL2,LYPLA2,IMPAD1,TSK…
0.00883361204294807	OFD1,SIN3B,SGTB	LAMTOR4,TBPL1,EPB41L1,LCP1,SDCCAG8,FAM168A,UBE2I,DIS3,CHD2,ENDOG,PAFAH1B1,OFD1,PHF21A,NAA30,RBM14,KRT17,ROGDI,ATP6V1F,CHCHD4,HCK,TPD52,MIB1,MAPRE3,STX17,PANK4,RWDD4,YLPM1,TEX264,ZC3H18,GSTO1,SH3YL1,TSC1,CHMP5,CSAD,ATP5I,ATP6AP2,SLC16A3,ACBD3,USP18,RMDN1,NDUFA11,CDK11B,TMEM106B,MRPL3,PDF,AGRN,MYD88,DLG1,PHKA1,EPHB4,ATAD2,GPATCH11,FUK,KMT2D,ITIH5,OTUD6B,SEC13,HPF1,PPP6R1,LAMA2,TRAPPC10,DDX31,ANKRD1…
0.00883361204294807	RAB2A,FHL1,HDAC7	PLXNC1,SH3D19,HSPA12B,PTGIS,KCTD12,GMPPB,APEH,PIK3CB,WDR91,GCN1,SRPX,VPS16,IL4I1,TRAPPC1,SH3BP4,ATAD2B,PGRMC2,LOXL1,YBX2,ATG2B,SYNE1,HMGCL,ZCCHC6,MDC1,FOLR2,SFRP4,TIMM10,IFT140,PTPN14,VAV1,GMFG,RAB2A,LUM,CIRBP,NUBPL,PSMD6,SPAST,NECTIN4,TMEM109,EIF4G1,RFC5,DAB2,KLHL22,POLR1A,DSCR3,HTATIP2,SKAP1,PODN,ARHGAP18,PLIN3,SMYD2,DHX32,SLC25A5,AARSD1,NEK9,MAPRE2,SPI1,CBX4,SCAMP4,FHL1,NT5DC1,KMT2C,FARP1,TOMM…
0.00414337126977096	EFTUD2,RANBP2,AKAP13	U2AF2,DDX3X,INTS1,SF3B1,SUPT5H,NAT10,PRPF8,NAA15,RPS19,EFTUD2,EIF3E,PRKDC,EIF4G1,NOL6,SERPINA6,CPSF4,CST3,CD99L2,PPM1G,YBX1,LIN7A,EEF1D,EIF3C,THUMPD3,RPS3A,RANBP2,CKAP5,FUCA1,GSTM2,RRP1,RRAGC,ZC3H15,MRPS18C,NOP2,CCNK,NAA10,EIF3L,DERL1,NOC4L,CNOT2,CSDE1,MFAP2,NASP,CPSF1,CSTF2T,USO1,ERBB2,TF,MAP2K4,AKAP13,THADA,ARIH1,RPLP1,SPAST,MYO5C,NEO1,CD93,POLDIP3,KDM4A,ACSS3,F13A1,RPL12,CSK,MDH1,VPS16,NAA40,Q…
0.00373237299385881	EIF4A3,WDR35,PRPF4,LARP7,CUL1,GNL1,ESR1	PLCB1,ELOC,DOCK9,MRPL58,CDA,EEF1D,CHERP,ZNRD1,RANBP2,NUP93,MRPS12,AIMP1,WDR74,UBE2O,EHD3,EIF4A3,HPGD,SNRPD2,LPCAT1,CSNK1D,SURF6,RDH13,MAN1A1,YTHDF3,SERPINA1,TMEM30A,NHP2,LENG8,RAB5B,SPP2,NBEAL1,CASP6,EGFR,FAM207A,SMARCA1,HLA-A,PVALB,CAMK2D,ARHGEF1,RREB1,STIP1,GGT5,ZFAND3,WDR35,SUCLG2,NAA15,ARMT1,THBS1,XAB2,MRPL44,SHOC2,ELL,ARHGAP5,PRPF4,EXOSC6,STAP2,EPHX2,LONP1,CHMP1A,NECTIN4,PSAP,BPIFB1,MTA2,FRG…
6.41002700636628e-05	SPTB,SPTA1,SLC4A1,ANK1	AHSP,EPB42,SPTB,BPGM,SPTA1,CA1,HBD,SLC4A1,FKBP2,ANK1,SNCA,ATP5I,HIP1,NQO2,DDX3X,PSMD3,CRABP1,AMACR,SUFU,LIN9,LARP7,REEP3,GSTM1,MAN2A1,FAM103A1,ZFAND3,PTGFRN,SPINT1,NR2F2,SNX29,CPB1,HACL1,CKMT1A,CDK2,GATC,NPC1,CCDC124,RAD21,MBD2,WRN,CUX1,RPE,FAM49B,GLDC,USO1,CDR2L,WARS2,RPL17,TAF5L,POR,IFIT3,CELF1,BCAT2,TBPL1,NDUFS1,MAD1L1,CRYBG1,OSBPL10,GNL2,RPS3,GPX1,DDX59,CUTC,RPL18A,BAIAP2L1,BCAS2,NUP93,SLC12A…
0.00140924936565228	ANK1,SPTA1,SLC4A1	HGS,PRPF19,RREB1,RABGAP1L,CCDC124,VEZF1,RBL2,RHOA,RCHY1,SLAIN2,WDR75,PTBP1,RBMXL1,AHSP,CLCC1,EIF3F,EIF3C,PCBP1,C5orf24,OGT,TAX1BP1,ELL,SMG9,INTS12,UBAP1,VPS72,PSMA2,TYK2,ZC2HC1A,RPS11,EVI5L,NFKBIB,RCOR1,RBBP6,CAMKK2,RPLP1,EIF3M,PSMB3,WASHC3,GATC,TMEM30A,DGUOK,UFM1,CNOT3,SRCAP,COMMD3,ERLIN1,CAPZA1,PPIL1,PRMT1,UBA1,TOR1AIP2,MARK3,ACTR2,PECAM1,GLTP,BCAP31,FAM32A,AIDA,GNL3L,CLEC3A,SF3B4,SURF6,POLR2L,…
6.41002700636628e-05	SPTA1,SLC4A1,ANK1,SPTB	HBB,SPTA1,HBA1,SLC4A1,CA1,AHSP,ANK1,BPGM,HBD,SPTB,EPB42,CAT,HBG1,SNCA,PSMD4,YBX2,RPL30,DTNBP1,IBTK,CDK5,GORASP1,IQGAP2,AFM,ZNF618,MPC2,EPCAM,TTPAL,RPL24,HS1BP3,TMTC3,POP7,SMARCA2,MTHFSD,INPP5K,SEC23B,VPS50,NGRN,COMMD9,RPS17,SULT1A1,RALY,APOL1,ATP6V0D1,MAP2K5,FUCA1,FPGT,SNX18,TPM3,ZCCHC17,UBE2M,DHX37,CHKB,SEC14L2,DMXL1,ACAT1,TRAF3IP1,MRRF,KIF13B,TMLHE,VDAC2,SLC44A1,PAFAH1B1,MX2,PMM2,GRAMD1A,PTCD3,…
6.41002700636628e-05	SLC4A1,CD44,SPTA1,ANK1	ZNF787,DDA1,ELOA,CREB1,NDUFA7,PTBP1,GATAD2B,HGS,AHSP,HBD,RBCK1,RPS11,ACTA1,EPB42,TBCA,RPS19,RBM14,RACK1,SRSF3,GID8,ASNA1,CLTA,CA1,CNOT7,NFYA,MED21,SUMO3,EIF3F,RPS26,NDUFA5,BPGM,DCTN3,LBH,SAR1A,RBMX,ANGEL2,ADD2,VBP1,VPS13A,DMTN,SNCA,SLC4A1,CD44,HBA1,HBB,YBX1,TWISTNB,FAM111A,RUFY1,SPTA1,CPB1,PKNOX1,POLR2G,PROM1,PDZK1,QTRT2,ANK1,SLC2A1,TOR1AIP2,UHRF1BP1,VDAC2,ABLIM1,ENPP1,TTC21B,YOD1,EXOSC6,CWC15,ND…
6.41002700636628e-05	SPTA1,ANK1,SLC4A1,SPTB	EPB42,AHSP,CA1,SPTA1,HBD,BPGM,HBB,PRPF40B,ANK1,SWAP70,SLC2A1,SLC4A1,RBM15B,SPTB,DMTN,DYNLRB1,CTDP1,PCMT1,URGCP,HEBP1,CREB1,ZC3H15,CPB1,GINS4,ZNF598,RPS6KA4,MYO5A,ASCC3,SERPINI1,UTP6,UBE2N,ATP6V1G1,PHF8,RAPGEF1,EXOSC6,CFP,DDT,RAB3GAP1,CDK5RAP3,WDR61,TOMM22,RPL18A,MANBA,VKORC1L1,SNAP29,BRCC3,SNX9,CHGB,AKAP1,NHP2,PI4K2A,MAVS,XPA,EIF3K,LSM5,LCMT1,PELP1,SNRPA,IPO8,KMT2A,MPG,ABCF1,RPS21,CHMP3,BCL10,MOC…
0.00527038049254441	ANK3,PWP1,SMAD2	MARK2,ELOA,RBBP6,RBMXL1,EIF3C,DDB1,CUL1,PNN,GATAD2B,RPS11,SMC1A,SETX,ACTA1,RPL32,TXLNA,CHMP1A,USP36,TANK,RBM14,C19orf47,SURF6,RPL29,KRI1,RANBP9,C1QB,PRPF6,PHF3,MARCKS,ASNA1,ANK3,TPR,NOL8,RBM26,SNAP29,NUP205,NFX1,ELL,CWC22,ACIN1,RFX5,LBH,SAP130,DNAJC8,RSRC2,VAMP8,GATAD2A,MOB1A,RPL31,NUP188,ING1,NUP85,PSPC1,REEP4,RPAP2,NFATC1,MBNL2,JUP,HDHD3,NOC4L,RPL27A,DNLZ,GALNT6,SNAP23,RANBP2,PREX1,DGKZ,ACTR3B,…
0.00527038049254441	ANK3,PWP1,SMAD2	MARK2,ELOA,RBBP6,RBMXL1,EIF3C,DDB1,CUL1,PNN,GATAD2B,RPS11,SMC1A,SETX,ACTA1,RPL32,TXLNA,CHMP1A,USP36,TANK,RBM14,C19orf47,SURF6,RPL29,KRI1,RANBP9,C1QB,PRPF6,PHF3,MARCKS,ASNA1,ANK3,TPR,NOL8,RBM26,SNAP29,NUP205,NFX1,ELL,CWC22,ACIN1,RFX5,LBH,SAP130,DNAJC8,RSRC2,VAMP8,GATAD2A,MOB1A,RPL31,NUP188,ING1,NUP85,PSPC1,REEP4,RPAP2,NFATC1,MBNL2,JUP,HDHD3,NOC4L,RPL27A,DNLZ,GALNT6,SNAP23,RANBP2,PREX1,DGKZ,ACTR3B,…
0.00556181584302135	PCBP2,U2AF2,SP1,VCAM1,PIH1D1,ACTA1	NDUFA11,HPS6,C5orf24,LGALS7,ORC4,PPIE,SF3B1,RPLP0,RPL22,DDX55,PCBP2,FBXO11,STRIP1,NOL10,XPO6,COL6A2,TATDN3,EIF3F,MAP4,TAMM41,PPP1R13B,TAF9,U2AF2,FUT11,CHMP2B,HSPA8,WDR33,RANBP1,RPL7L1,ETF1,HMGN2,MRPS15,NDUFC2,NUBP1,VPS39,RBM26,ATP5D,NFYA,CLEC16A,VWA1,RCHY1,VAT1,RPL19,SP1,SRRT,AFF4,SRP19,GRN,CHTOP,GRPEL1,RANBP9,INPP5B,COL16A1,PREP,VCAM1,ACTR1B,BOLA1,GPX1,ZC3H18,HDDC2,UBAP1,SHROOM2,LEO1,CAPZA1,CBLL…
0.00556181584302135	RPL28,YBX1,PNN,THRAP3,RPL35A,OSGEP	RBM6,SAFB,ZC3H13,NOLC1,SLTM,TCOF1,RPL28,NDUFA11,CCDC9,HDGFL2,YBX1,UBA1,MFAP1,RPL26,PCNP,NUDT16,CHMP2B,PNN,EXOSC6,WDR33,BLOC1S5,PHF3,SLU7,PPHLN1,PDZD11,CLTB,ZC3H18,CALR,SUMO3,THRAP3,MTX1,WRAP53,GANAB,APOM,RPLP2,DSCR3,RPS10,AP3M1,ARGLU1,SAP30,POLR2C,ITPR1,CSNK2A1,UBL7,ZC2HC1A,SLIT3,SNRPE,USP11,TDG,VPS11,FBXO7,CRMP1,PSMA4,PNP,COX8A,GABARAP,EIF3A,PDIA6,ATG5,CHAMP1,KMT2A,NDUFAF5,KIAA1468,NUP160,TAF2,N…
0.00114376916612455	ACIN1,RPS16,THRAP3,PNN,SAP18,RPL28,RPL6	ZC3H18,SP1,ZC3H4,EDF1,SAFB,ZNF143,SLTM,HDGFL2,FAM192A,WDR33,ARGLU1,NFXL1,SNUPN,ACTB,CTCF,SCAF1,ZNF330,LSM3,ACIN1,RPS16,ZC3H13,THRAP3,ZC3HAV1,SRRT,CCDC9,NUTF2,RPL22,CAPZA2,EIF3A,MAZ,SMC1A,ABL1,YY1,FAM76B,CCDC86,SLC16A3,ZFP91,MRPL30,STAM,SNX33,CDKN2AIP,VEZF1,SRSF6,PPCDC,FCHO2,MAP7D1,CHMP1A,PNN,MRPS12,SNRPG,TWF2,SAP18,RPS10,SRSF4,SNRNP70,SP3,KERA,RPS19,UBAP1,CD36,DAPK2,RBM6,NOLC1,SAFB2,GRN,SDF4,ALDH…
0.00689728285801005	APOA2,APOA1	SUMO2,HGS,LRPAP1,SUMO3,TMSB4X,RPS11,YBX3,APOA4,MARCKS,LSM6,EIF2S3,CDKN2AIP,CSN2,SMAD5,USP34,ERC1,ARF4,PSMB4,GTF3C6,ZFP36L1,ASNA1,FCER1G,TRNAU1AP,MRPL42,RMDN3,ITIH2,UBQLN1,UBN1,HRG,SAA2-SAA4,APOA2,CPNE2,RBM5,MED23,CPB2,APOH,APOA1,HGFAC,PROM1,CDKN2A,ATP6V1B2,RETN,COG7,SELENOP,OTUD7B,DTX3L,CARS2,SON,CFHR1,RBP4,AAMDC,TCERG1,BSDC1,SNRPA,MON1B,TNPO3,MTA2,TPM3,TRIM2,CCDC93,ARL3,POLR2H,SCO2,SHBG,NBEAL2,I…
0.00280954029282919	PRPF6,RNF14,CDKN2A,XRCC5,AR,SMARCD1,FKBP5,RAI1,SMARCE1	PYM1,JPT2,LANCL2,RTCA,MICALL2,RETSAT,PRPF6,ARCN1,SMIM20,ACTN4,RNF14,DLG5,SLK,ADGRL2,REEP6,CDKN2A,NCALD,TMEM189-UBE2V1,MTMR1,CLIC1,RPS26,PIN1,CARHSP1,SHTN1,CAMSAP1,ECHDC1,DTX2,PPIE,TPM3,ENOPH1,TWF1,PEX3,GOLGB1,SDCCAG8,XRCC5,TBC1D10B,FBXO2,ABRAXAS2,RUFY2,TUBB4A,RALGAPA2,KIF3B,CCDC93,UBE4B,AR,BCKDHB,PREP,RPS11,POLR2E,NUDT9,WNK1,PDXP,PRDX6,ASMTL,RBM25,DIDO1,ESD,SLC25A13,KANK1,FLYWCH2,ENPP2,RPL32,TRAF…
0.00642000639505257	ARF1,RPL22,AP2A1,INPPL1	MED24,DPP8,MGMT,SLC16A3,NLRP2,MIB1,GHDC,ARF1,AFMID,NAPG,RPL22,HIGD1A,LAMTOR4,HCK,UBE2T,TSR2,UGGT1,TSC1,ALDH1B1,TRIM16,LIN7A,FUCA1,COG7,TIMM44,VWA8,CLIC3,RAD21,MPI,RANBP1,QTRT1,RDH14,AP2A1,JCHAIN,KHK,RPL10A,ITIH3,TMEM63A,ARSB,ATP5I,RNF214,MRPL3,C14orf159,GOSR1,TPM4,PHGDH,ETV6,HAUS6,TCERG1,ARMCX3,ZFR,IPO11,SBNO1,MIOS,SLIRP,GALNT6,HNRNPL,TMED10,CDK11B,TBC1D2B,CCDC134,MYH14,KLHDC2,UBE2I,ABHD14B,USP18…
0.00169346679858084	PLEC,SHPK,DYNLT1	CEP170,FNDC3B,NPRL3,MED8,UQCRB,TTN,SUDS3,ERC1,NDOR1,ITGA11,CTU2,ORC4,PPP2R5A,MMP14,DNAJC21,UQCRC2,SMTN,PLEC,ABHD14B,PPHLN1,TJAP1,RAB2B,FBN1,DCTN3,LIX1L,ISG20L2,NENF,ZFP36L1,SLC25A10,NOP16,ELMSAN1,NECAP2,CCDC28A,TRIM65,HNRNPA3,NIT1,P4HTM,COA7,AGTPBP1,RBP7,FABP5,FXN,CYR61,KAT5,KCTD21,GLCCI1,CNP,CRYBG3,LRP2,GSTM4,C19orf66,HLA-DPB1,TBC1D24,EIF4A3,TP53BP1,SETD1A,TUBGCP3,SHPK,PRPF18,NDUFA12,LGALS1,KIAA…
0.00689728285801005	ARHGAP29,KDM1A	SZRD1,ASNA1,NAP1L1,HNRNPDL,ZFP36L1,GATAD2B,LUZP1,RBBP6,DDB1,MZT1,LSM6,PTBP1,SUMO2,TOR1A,POLR2D,CRISPLD2,DAZAP1,ZNF787,HSPA8,PPP1R12C,RPL23A,WDR11,COPZ1,COPE,RCSD1,RPSA,MARCKS,EEF1A1,RPL18A,CDKN2AIP,DCTN3,HAUS3,NDUFA5,GNB2,C19orf53,RPL32,HGS,CARTPT,RPS11,RHOA,SRSF3,MED21,PIH1D1,CNOT7,FTSJ1,RACK1,BOD1L1,TELO2,ATP5B,RPLP0,SLK,ZC2HC1A,PDXP,ARL1,LRPAP1,RPS18,SDE2,PMF1,NFYA,ACTR1B,MAP7D1,UBL7,FAS,FMNL2…
0.00689728285801005	ARHGAP29,SIRT1	ARHGAP29,RPL32,DNAJC8,INO80C,PNN,SH3PXD2B,KLHL11,SURF6,HTRA2,RCHY1,CLCC1,LARP7,TOR1B,TXLNA,WDR74,CRKL,ARCN1,ANAPC4,ATRX,REPIN1,SMARCA4,TBCA,MFAP1,TTC1,FAS,AP2S1,NDUFA11,MRPS15,NOLC1,RPL29,SDAD1,SIRT6,HMGB2,ELOA,KATNB1,YBX1,ARMT1,INTS1,MRPL55,DDX59,CHMP4A,EDC3,RPL13A,COX7A2L,USP8,HMOX2,THOC7,ITPR1,TRIM56,RMND1,ARL1,DNAJB6,FAM91A1,TWSG1,GTF2E1,INPP5K,HOOK2,RDH10,TEFM,BASP1,MAP4K3,RUFY1,SMG8,NEK6,SL…
0.00967944465432822	ARHGAP32,CDC42,EGFR	YIPF3,ARHGAP32,SYNM,FGD4,CPT1A,SMAD4,UBLCP1,TM9SF4,CAMK1,SLC25A3,MCAM,DSP,EFS,PPP1R14A,FGF2,EXD2,CDC42,SELENOH,CHGB,APBB1,NDUFB6,ACAT1,AKAP8,GSTM1,PCLAF,SDC1,RSU1,SLC25A6,EIF2S1,SLC4A1AP,HECTD4,RPS5,GALT,SNCA,KDM6A,EGFR,WDR7,C15orf40,TTC9,AK3,MRPS2,TMEM214,SNRPD2,PAN3,CDH5,ARFGAP1,TMOD1,STRN3,SIPA1L1,SMAP2,CHMP4C,IDS,CPB1,TBC1D10A,NDC1,WDSUB1,CCM2,RBM12B,PSMC5,SRSF9,KCMF1,PGAM2,THUMPD2,LAMA5,POLR…
0.00854121907456476	CDC42,ARHGAP35	RPL35A,NUDT9,ITPKB,RPL23A,SON,RMDN3,TIMMDC1,MCFD2,TNFAIP8L2,PRKAA1,HOOK2,UBE2M,EIF4EBP2,MRPL55,MGLL,DBNL,NARFL,VCPIP1,NXT1,RPL18,UBFD1,PTGS1,PAK4,RPS19,CD59,CLIC6,TOMM34,PDE5A,DTX2,WDR45B,NACA,APOM,CNP,FAS,FXN,ACTR6,PLA2G4A,YIPF5,POT1,XRCC5,ZC2HC1A,RPL35,ITGB1,CHD2,GSPT1,ATL2,XIAP,ZNF668,PRKAR2B,CPVL,SMCR8,BIRC2,MRPL19,RPL31,YTHDF3,CDC42,RPL39,HNRNPA1,RBMX,PTPRE,MAP4,GOLM1,BIN3,CUL2,BPIFB1,ENY2,R…
0.00198926789257468	ARHGEF35,ARHGEF5	HUWE1,AKR1A1,JUP,SBSPON,ARHGEF35,KCMF1,MRPL17,HEATR5B,CUL1,TDRD7,HYOU1,DBN1,URGCP,DDX20,SMAD2,ZW10,RHEB,INTS6,ZC3H15,NUP205,PPP1R14B,BIRC6,PGD,CAPZB,GNAI3,SGTA,GRB10,HK2,KMT2A,IRS2,MYO5A,UBN1,CCT8,SPTBN2,NRBP1,TPT1,ARHGEF5,HIF1AN,MTPN,CPPED1,PDK2,COMMD1,SEC11C,MRNIP,LENG9,PSMC6,TRIM16,RPUSD2,CSDE1,UBASH3B,ATL2,API5,SHB,RAB3D,BPIFB1,UCHL3,NSDHL,ARL6IP5,ISG15,INTS1,ATG9A,RELL1,MARC2,GSPT2,TTC27,PLC…
0.00198926789257468	ARHGEF35,ARHGEF5	PLIN3,ZW10,JUP,CCT4,SBDS,AHSA1,BET1,FAM122A,NME7,PIK3CB,KPNB1,KRT6A,AGPS,ALDH5A1,UMPS,RAB3D,ARHGEF35,DDB2,KRT19,TUBB2A,H3F3A,HSD17B7,HUWE1,TOP1,RFK,CHMP3,CD99L2,NCKAP1,PKP2,SEL1L,ADARB1,ARHGEF5,TPT1,SLC30A1,SH3GL1,GMEB1,CASK,QKI,ATL2,PTPN1,PGRMC1,UGP2,CALR,NARS,EIF4E,ITGA5,CUL1,SGTA,CCDC51,FYTTD1,GORASP1,PDK2,PSPC1,MXRA7,ATG16L1,GNAQ,MRPL17,KCMF1,MARC2,MRGBP,STAMBP,GFPT2,OPLAH,PSMD1,BIRC6,BMS1,MA…
0.00468633974969742	ARHGEF6,ARRB2,LPXN	CARTPT,KRT17,RPL15,ARHGEF6,WDR46,RPL7A,NOP14,PPP1R14A,XPA,GRB2,STAT6,RPL17,CRISP3,TTL,HSP90AA1,TRIM29,NLE1,DBNL,WASHC4,TXNIP,ARHGAP15,ARRB2,CCDC174,CHGB,DEF6,CPE,CLU,FYTTD1,ARHGAP30,SBSPON,LIN7C,DAG1,FTSJ3,NECAP2,ANKZF1,LATS1,IRF2,HDAC7,RETREG3,AKR1B1,COMMD2,FAM207A,STEAP4,ING1,STK11IP,ERP44,CALML3,ATG3,FAIM,IL16,LAMA4,LRBA,IGLL1,CNPY2,MED12,C19orf53,APOD,HCLS1,DNAJB12,NCKAP1L,NSRP1,BPIFB1,LAP3,S…
0.00149562360846358	ARID1A,ACTL6A,SMARCC1,SMARCB1	ZFP91,GATAD2B,PNN,SMC1A,RPS26,TBCA,ARID1A,FNBP4,MARK2,CDKN2AIP,RPS11,C19orf53,SARNP,ATXN2L,SUMO3,RSRC2,MAEA,YLPM1,SRRT,PRRC2C,INTS12,MARK3,RPS29,ARGLU1,USP36,CUTC,DBNL,RPP30,SUMO1,FAM45A,RPL35A,PTBP1,ZFAND3,CUL3,TAOK1,KIAA1143,TMEM11,SNRPE,CREB1,ZNF609,NOTCH3,CNOT3,EIF1B,ELOA,MGRN1,NEK7,POLR2G,APRT,ACTL6A,XRCC1,NIN,DNAAF5,ICA1,NOL7,COPS7B,PPM1G,COX8A,YRDC,MTA1,ECE2,LSM3,EEA1,VPS11,INPP1,PAPD5,LSM…
0.00833841774453024	RAB1A,RAB5C,SPAG1,CANX	MARCKS,HGS,SUMO3,BOD1L1,SAR1A,PNN,PCNP,PRRC2C,ZNF787,PPP1R12C,UBQLN1,GATAD2B,ZFP91,SETD2,MARK2,PTBP1,WDR45B,CENPB,CPSF2,RCSD1,EIF4B,RPS11,ZC2HC1A,ATP5B,ZC3H13,TCOF1,BUD13,RACK1,SRSF3,PPM1G,RPS16,VAPA,STT3A,TMEM214,ARGLU1,SEC11A,TUFT1,RAB1A,EIF3A,RPN1,NDUFC2,C1QC,DBNL,CDC42BPA,CSNK2A1,TACC1,RBCK1,MLEC,SDCCAG3,EFHD2,RRP8,ATP2B4,SHMT1,RPS19,COX4I1,PAN3,GDI1,TANC1,SPECC1,FCER1G,AGPAT3,RAB5A,PDXP,ECHD…
0.00295595877741064	ATP13A1,CANX	THBS1,CSAD,OTULIN,EIF2S3,ERCC2,IMPDH2,USO1,RPL35A,PHF21A,CHCHD4,RNF214,MTDH,FCGR3A,ENDOG,MMP19,LIN7A,SP1,ELOB,FMNL3,ACBD3,RPL10A,MBOAT7,UEVLD,SRRT,YTHDF3,NECAP2,RBBP9,RBM5,NRBF2,KRT17,CAMK1,MGMT,RBX1,TWISTNB,CIZ1,REEP4,DNAJC10,SAR1A,ATG3,USP4,LTBP2,ATP6V1F,NFATC3,BPTF,FNDC3B,CD44,ARID1A,RBBP7,ITIH3,SLMAP,SARM1,TMEM63B,GHDC,YIPF5,ATP13A1,ATAD2,ZHX2,MCU,CETN2,ARL2BP,PEA15,RAB32,ZC3H18,FKBP11,TSC1,E…
0.00322903126518004	SMC1A,SNW1,ATRX,POLD1	MARCKS,PRRC2C,ZFP91,PCNP,PTBP1,MAEA,SUMO3,GATAD2B,CLTB,TBCA,SAR1A,HDDC3,NDUFA7,PNN,MARK2,RPL29,RPS29,THRAP3,TCOF1,SARNP,RBM26,RBM6,SRSF3,RPL35A,ASNA1,SMC1A,SETD2,EIF3A,INTS12,NOL8,ELOA,TMEM263,SAFB2,CHMP5,ALDH1L1,FCER1G,APOOL,ZC3H13,LALBA,RABGAP1L,TRIR,DCAF8,ATN1,SAFB,C1QC,FHL1,TACC1,YME1L1,BRCC3,BCAP31,GTPBP10,SNW1,SRSF2,RPP30,MTIF2,MSRB3,MMAA,ADIRF,PDLIM5,HMG20A,RAB1A,RBM39,HDGFL2,MICALL2,SEPHS…
0.00409963059488909	ENY2,USP22	ENY2,PPM1G,DDX3X,TONSL,GTF3C1,COA7,G3BP2,RBP7,RPL12,NAA15,GNL3,MRPL51,POLR2B,NAA10,UBAP2,LARP4,NKRF,EIF4G1,TOP2A,SPTAN1,SNX11,NONO,USP22,COL4A1,SMTN,ESD,THOC3,C11orf96,TGFB1I1,SCRN2,RALY,U2SURP,TNS2,DCLK1,AHSG,CSE1L,C1orf122,TNS1,METTL2B,S100B,NSUN5,CHAF1B,PLIN1,CMSS1,UBE2T,SLC4A1AP,LSG1,CRYL1,LYVE1,ETV6,FABP3,SOD3,HERC2,SETDB1,FLT1,PLAT,CSDE1,UBE2S,EHMT1,PRC1,MRPS34,TAF9B,LIG1,NAT10,NUDCD3,HAT1,…
0.00356185056592149	NAP1L1,CASP3,CNOT7,COPE,MRPS10,LSM5,PSMA5,BAG3,CCT7,WNK1,RAB4A,YWHAQ	PPIE,NAP1L1,EEF1A1,CLTB,NUTF2,CCDC93,CASP3,NEMF,MVB12A,SEPHS1,FTSJ1,HDDC3,GAPDH,CNOT7,BASP1,CHMP2A,CDR2L,DEFA3,DDX1,PIN1,MED21,SMAD5,DDA1,PPP4C,ABRAXAS2,PYM1,RPLP0,CRTC1,LRPAP1,PIAS1,COPE,POLR2D,MICALL2,ELOA,EIF5A,MRPS10,GRN,GMEB1,LSM5,SAMD1,TMEM189-UBE2V1,MFAP5,MAP7D1,STAM,UBTF,ARRB2,PSMA5,CSN2,QTRT2,YARS2,BAG3,TAMM41,ARF1,JAK1,STRIP1,RACK1,CCT7,CEP170B,ERAP1,TYW5,PDZK1,DGKQ,METTL15,ORC4,WNK1,ME…
0.00527038049254441	NLRP2,ARID1A,TRIM25	LAMTOR4,BCAT2,BID,FUCA1,GOSR1,MPI,MTCH1,NLRP2,PRPF6,RNF214,SDCCAG8,VPS28,LPIN1,AGRN,PRIM1,ARID1A,ARSB,MRPL33,CNOT11,ITIH3,SLC4A1,GSTO1,FCGR3A,EIF4G2,TNC,MYL9,NCKIPSD,PYCR2,CANX,TSC1,MNAT1,DPP8,RNF146,ZNF687,PPP1R12C,CHCHD4,EPHB3,EPM2AIP1,REEP4,MIB1,PCF11,USO1,ABHD16A,ARFIP2,CCNL1,DSCR3,C7orf55-LUC7L2,SERPINB10,RETN,RPL4,YLPM1,KMT2D,GIMAP4,CLTB,HNRNPAB,PLBD2,HAUS6,FOXA1,GRPEL1,OSTC,SETD3,ZFAND3,AS…
0.00519169714645069	SNW1,CIZ1,ARID1A,EZH2	SNW1,TPRKB,RBL2,CIZ1,PPP1R2,EIF3C,HDDC3,CWC22,POLR2A,LANCL2,ZC3H11A,NOL8,SRRT,ZNF638,TG,ZFP91,PSMD7,MARK2,ACAA1,S100A4,MVB12A,RBM14,FPGS,PRDX2,FAM208B,PDS5A,TFCP2,PCBD1,PNN,BRD2,SAFB2,ZRANB2,EIF3A,SRP68,NIN,NIPSNAP2,RRP36,RANBP2,TWISTNB,ATXN2L,YWHAH,CSTF2T,BCLAF1,ZFAND5,PIP,HEXA,PHF5A,TIMMDC1,EIPR1,STK17B,SCGN,ACP1,RTCA,MAEA,ELL,GANAB,TBCA,RPS29,NRBP2,ARID1A,NSD2,PRDX5,CSN2,MRPL57,ACOT13,CRELD1,T…
0.000641518282014615	CIZ1,SNW1,EZH2,ACTBL2,SMARCD2	PCNP,CIZ1,SAFB2,PHC3,INTS12,BCLAF1,SPR,NDUFS7,MAP7D1,ZFP91,TPRKB,TRIM24,ITGA2,PHF6,PTBP1,SDAD1,ANAPC4,ULK3,EMSY,GNG12,POLDIP3,GDI1,ELMO3,RBM14,STX10,TMEM189-UBE2V1,C19orf66,RPL28,MTFMT,HDAC5,ATRX,BLOC1S5,GRN,ZNF687,TOR1AIP1,TUBB4A,ZNHIT6,UPF3B,TXLNG,CASP3,CSTF2T,JMJD7,EDF1,TRIM36,POLR2M,RNASEH2B,HERC4,PCBP2,ZNF787,GOLGA4,CCDC86,NFKBIB,KIAA1143,ZNF460,CD44,ZC3HAV1,MED8,NCBP2,SEC62,ROCK1,RCHY1,SMTN…
0.00733784765958348	MAPT,RAB8B,BIN1,HDAC6	GATAD2B,NDUFA7,MARK2,ZFP91,ZFP36L1,MAEA,RBMX,SUMO3,PPIL1,PRRC2C,ELOA,CDKN2AIP,PHF5A,TCOF1,RSRC2,ATXN2L,LSM6,PCNP,BOD1L1,PPIE,SARNP,ZC3H14,PTBP1,GRN,PPP1R12C,HGS,LBH,GPATCH8,ASNA1,UBQLN2,NUBP1,EIF2S3,SMC1A,MAPT,RUFY1,RBM14,CHCHD3,CNP,NUDT9,RPS19,FCER1G,DBNL,MSN,CARTPT,MSRB3,MTX3,ELL,BRCC3,IK,SUCLA2,TNS1,TRIM2,RPS6KA4,EIF4EBP1,RPS5,UQCR11,NAA10,YME1L1,DNAJC7,MRPL40,MAPRE3,RPL10,SMARCC1,NOSIP,FAS,AB…
0.00733784765958348	MAPT,RAB8B,BIN1,HDAC6	GATAD2B,NDUFA7,MARK2,ZFP91,ZFP36L1,MAEA,RBMX,SUMO3,PPIL1,PRRC2C,ELOA,CDKN2AIP,PHF5A,TCOF1,RSRC2,ATXN2L,LSM6,PCNP,BOD1L1,PPIE,SARNP,ZC3H14,PTBP1,GRN,PPP1R12C,HGS,LBH,GPATCH8,ASNA1,UBQLN2,NUBP1,EIF2S3,SMC1A,MAPT,RUFY1,RBM14,CHCHD3,CNP,NUDT9,RPS19,FCER1G,DBNL,MSN,CARTPT,MSRB3,MTX3,ELL,BRCC3,IK,SUCLA2,TNS1,TRIM2,RPS6KA4,EIF4EBP1,RPS5,UQCR11,NAA10,YME1L1,DNAJC7,MRPL40,MAPRE3,RPL10,SMARCC1,NOSIP,FAS,AB…
0.00854121907456476	BLOC1S5,BLOC1S2	FAM96A,SRSF9,COMMD6,LCMT1,KHSRP,CCAR1,RPS19,SOAT1,BABAM1,TXNDC9,CPSF4,PGM3,DPY30,PPCDC,SRSF1,AIDA,CSTF2T,LRCH3,PML,PRPF38A,BLOC1S5,CASP3,ZC3HAV1,DCAF7,CIR1,DIP2C,ACSS3,CCDC22,BPIFB1,TOLLIP,ELOC,CAPZB,RBX1,VPS18,SEPT6,SMU1,RPL5,CRIP2,MFAP2,URGCP,ERP29,RPL27A,TRIP10,STXBP2,GPD2,CD163,RUVBL1,PGLS,HDAC4,ARL6IP5,HARS,COPS2,FAM45A,TTC9C,SBDS,F8A1,FCHO2,BRK1,EMILIN1,NDUFB5,SELENOW,COL2A1,PSMD14,RPL32,SN…
0.00883361204294807	SMC1A,BPTF,EZH2	ZFP91,MAEA,RABGAP1L,PCNP,FNBP4,CCDC9,SUMO3,LALBA,GATAD2B,BOD1L1,PNN,BLOC1S5,SLTM,YLPM1,RPS29,GATAD2A,SMC1A,MARCKS,ZC3H14,THRAP3,NOTCH3,PPP1R11,PPIL1,CARTPT,MEPCE,HSD17B10,SETD2,PPP1R12C,SMAD5,MARK2,YBX3,RSRC2,CDKN2AIP,INTS12,ZNF668,PIH1D1,BPTF,GNB1L,PPM1G,RPS27A,CUL4B,SH3GLB1,BRCC3,RAE1,DSCR3,NCL,FTSJ3,PSMD9,EZH2,ARVCF,MESD,RFC1,RNF7,AUH,GCC1,RRP36,DDRGK1,ECHS1,TMEM189-UBE2V1,NDUFC2,SMARCC1,RTFDC…
0.000205440035268656	EIF5B,XRCC5,CCT4,RALY,SMC6,CREB1,ZC3HAV1,TRA2B,HNRNPF,ATXN2L,PSMD3,UBA1,GCC1,SYNCRIP,MYL12A,DYRK1A,AIMP2,CCT5,RFC2,TOP3A,ADRM1,ABL1,POLD1,RUVBL1,EIF3A	ILKAP,MED10,EIF5B,LARP4,IK,CAAP1,XRCC5,CCT4,EIF2B1,TWISTNB,ATRX,RALY,NUP50,EIF3C,U2AF2,SMC6,CREB1,RANBP10,XAB2,MARK2,LIX1L,AGT,SNX33,UHRF1BP1,GATAD2A,CNOT10,FBXO28,TTR,ZC3HAV1,MRPL2,ZNF638,TRA2B,NCBP3,HNRNPF,SRRT,RASA4,ACP6,MED9,HINT1,ATXN2L,MAX,SART1,MED25,MYCBP,HIKESHI,PSMD3,PLTP,UBA1,FMNL3,GCC1,SYNCRIP,MYL12A,MYL9,CWC15,BOD1,YIPF3,DYRK1A,PYM1,TRIM2,AIMP2,CALB2,CCT5,MRPS15,DGUOK,USP22,C1orf35,K…
0.00665412551281812	SNW1,SMAD3,KPNB1,FN1,HERC2	GPX1,TIMP3,ZC3HAV1,KIF5B,SMIM12,CBLL1,RSRC2,PPIL1,SNW1,KLF16,GATAD2A,THUMPD2,GATAD2B,FBXW8,SETDB1,S100A4,PRPF6,AFDN,CHGB,GCDH,SETD2,SMAD3,CAPN7,GID8,CDC73,ZNF24,SNRNP70,SMTN,COMMD3,RHOT1,PGAM1,RPS29,ZC3H14,SCGN,KANSL2,LSM6,FCER1G,ELOC,NIPBL,SF3B2,ACTA1,R3HDM2,CSTF2T,LBH,XRCC1,AIMP2,RFLNB,ZFAND6,EIF3G,HDDC3,FERMT2,CNOT3,PHF10,NUPL2,KPNB1,EMILIN1,BMS1,STON1,TGFBRAP1,MGAT1,MRPS16,GTPBP10,SCO1,STEAP4…
0.00201107708338318	GPATCH4,BUD13,RPL14	PPM1G,PLRG1,RPL12,ELL,MARCKSL1,NCOA5,PRPF6,PNN,GATAD2A,DDX3X,SON,CTCF,TTR,SCAF1,ILKAP,ZGPAT,PAG1,EIF3C,RTFDC1,NAA10,YBX1,SF3B2,SETD2,SAMD1,SBSPON,GPATCH4,TANGO2,IFT80,ZNF598,RBM25,CHD4,NOP14,PRPF40A,WTAP,U2SURP,TPR,TRA2B,RANBP2,ZC3H18,SNW1,AGT,STIP1,SPAST,POLR2A,PTMA,COA7,CNN1,RBM26,ORM1,RBM10,BUD13,SGTA,POLR1E,MTHFS,DMD,ELOC,PAXBP1,UQCRQ,MRPS5,ABCF3,C12orf45,TSR1,SIKE1,YTHDC1,PGM5,MTPN,SRSF2,DRA…
0.00632394556442281	BYSL,LTV1,NOC4L,RRP12,NOP9	BYSL,LTV1,HUWE1,NOP16,RANBP2,NID1,ELOC,BCL7B,LENG8,MTUS1,TTC27,MRTO4,RPL10A,USP8,COL1A2,TOPBP1,PKP3,THOP1,IGFBP4,POLR2B,TPPP,HPGD,ERI3,KIAA0368,NCAPH,IPO7,TIMP2,NOC4L,BMS1,XRN2,STAT3,FOCAD,SBSPON,ARAF,CYGB,NFX1,USP10,BPIFB1,SDF4,CDH5,RPL31,IGLL1,PLTP,AIMP1,CGN,SDR39U1,SMG9,RRP12,ANAPC2,RPL32,LIG3,CCAR1,SMCHD1,POF1B,LRPPRC,ATP7A,SPG21,CADM1,APTX,CHMP1A,PLRG1,CFAP20,ERCC4,HEATR5A,PURA,SCUBE2,KRT16,…
0.00110095564582103	BYSL,NOP14,RRP12,PNO1,PARN,DDX3X	BYSL,NOP14,SART1,EIF5B,STIP1,BMS1,UTP18,ZNF638,SF3B1,NONO,POLR2D,WDR46,ZFR,CTSF,RRP12,THRAP3,NAT10,ANKRD28,SRP68,NUP93,PDS5A,UTP3,EIF3G,RANBP2,PNO1,MED25,MRPS24,TOP1,SDAD1,PLRG1,MRPS5,ANAPC16,RPS3A,RBM25,NRP1,SELENOM,PARN,DNTTIP2,ELOC,PPM1G,BCLAF1,PRPF6,COA7,CSTF2,ELOA,CTU1,POP1,POP7,GNL2,NUP205,SMG8,PLTP,CARS,ARFIP1,RPS18,TNFAIP3,SMG7,NUP85,ATXN2,PDK2,HNRNPC,RCCD1,RASSF5,HDGF,EML1,LRRC57,CEBPB,P…
0.00120485600400094	NKAP,PTPRJ	CDK6,RTF1,PTMS,CDK7,YES1,TSC1,BRD2,RAE1,MRE11,CTSS,TWISTNB,GNAS,NKAP,YIPF5,NOTCH2,TRADD,UBFD1,NAE1,PSMB1,EXOC8,MALT1,USP22,PTCD3,STX5,SNRPG,SLC16A3,PBDC1,PTPRJ,ABRACL,MAP3K7,UNK,CASP9,PLAC9,TUBA4A,TSC2,ELOC,ANKFY1,TRNAU1AP,IFI44L,MINOS1-NBL1,NEMF,GPI,UNC119,ANXA11,SEC24A,DDB1,DHRS11,SMC1A,ELANE,CFP,CIZ1,ATP5B,GTF2B,GPR107,HNRNPDL,PPP2R1A,DAB2IP,NOTCH3,TRIM24,FBXO4,CAV1,LSM3,PSMD11,ARPIN,MKRN1,DID…
0.000403374302152905	CPN1,CFI,CFH,C5	ATRN,CPN1,PYURF,F10,CFI,FGA,MST1,GLIPR2,C8B,STAB1,CHCHD4,RSBN1L,CPB2,C9,AFM,SERPING1,SERPIND1,STX7,CFH,ITIH1,SMARCB1,KLKB1,POP7,SMG5,VPS13D,SERPINC1,C7,EIF4E3,PSTPIP1,LIN37,C8A,INO80E,SCAF11,POLR2D,PLVAP,SIRT1,RBP4,TUBB,BRD9,DEF6,CSNK1A1,AMPD2,RAVER1,CP,ARPC2,APOC4-APOC2,ITIH3,PROS1,KNG1,UBE2C,APOL1,TNS1,C5,ALB,GSTO1,MRPL9,FAS,SAA2-SAA4,PTRH1,ACTR6,F11,VPS37B,FBXO6,RBP7,UHRF1,KRT6A,ZNF830,ABI3,IR…
0.00236339308988714	OFD1,HNRNPL,ATXN3	MBOAT7,DPP8,SDCCAG8,SLC16A3,ITIH3,CNOT11,GOSR1,CCDC50,TUBA1C,VPS28,MIB1,TSC1,BCAM,AHDC1,OFD1,CCT4,BORCS6,ARSB,ABHD14B,C7orf55-LUC7L2,KMT2D,TRIM25,FCGR3A,PRIM1,ALDH16A1,MED24,C1orf52,AP1B1,INPPL1,MRPL33,ARMC8,CHKA,NDUFA11,CLTB,HPF1,TPM4,HTRA1,STK25,FGGY,ABHD16A,HABP4,TBCD,PPP2CA,NANS,PRKCI,RAD21,LAMTOR4,ARHGAP31,TUFM,TMEM11,OTULIN,HSDL1,COMT,FGFR1OP2,RPL22,UPF2,NDUFB8,EPHX1,VPS51,UFSP2,PSTPIP2,GST…
7.23731612691205e-05	RBM14,SEC61A1,NFXL1,SLC25A3,RAB1A,CANX,UBXN4,TMX1,STT3B,SEC22B,AUP1,PTPN1,HMOX2,CCDC47,SRPRB,DIP2A	ZFP91,GATAD2B,ARID1A,RBM14,YLPM1,PNN,RPS26,RPS29,MARK2,SRRT,EIF3A,SEC61A1,SETD2,OXA1L,NFXL1,SLC25A3,MARCKS,NDUFA7,XRCC1,MAEA,PCNP,BOD1L1,SMC1A,RAB1A,VAMP8,ATP2A2,CANX,UBXN4,TMX1,PRPF40B,STT3B,SEC22B,AUP1,THEM6,RER1,PPIA,GOLGB1,MLEC,PTPN1,MPO,ITFG2,CLCN7,ELP3,GPATCH2,HMOX2,RDH11,TMEM214,MTCH2,DCAF8,AGPAT3,P3H3,RTN3,MYL12A,RPL7L1,SCGN,MBOAT7,SECISBP2L,ITPR3,PPP1CA,GSS,CCDC47,SAMM50,REEP4,CERS2,MYO5…
0.00689728285801005	CASZ1,RAF1	TMOD1,FGD4,SNCA,SLC35E1,SPTA1,FGF2,DNAJB4,C1orf122,ADGRL2,PSMD3,ATG2A,SYNM,CASZ1,UBTF,CSTF3,KRT5,HAUS6,TTPAL,PPP4R2,POF1B,CENPF,S100B,AGT,FLCN,OTUB1,USO1,CA1,TRIM29,CETN2,PALM2-AKAP2,LALBA,MAT2A,MCL1,CTNNBIP1,ZNF609,CD209,TAF7,DPP3,SAMM50,PTX3,STK26,GOLGB1,TRIM2,SMC1A,RBMX,EPB41L5,MRPL38,LDHB,EIF2B2,SLC4A1,CADM4,HNRNPA3,TLDC1,STX4,ALYREF,TIMM9,POLR2H,ELF3,LAMC2,INTS6,DYM,XPC,YIPF4,BZW1,WDR45,FOXK…
0.00413186527199045	CCDC6,PPP1CA,CREB1,BRCC3	PLRG1,NOP16,RPS15A,BPIFB1,AKAP13,SON,HMOX2,SNX15,VAPB,CDC73,NXT1,ILKAP,PDXP,SYF2,RPL19,GOLGA2,TRAPPC2,MUC2,CARHSP1,GSPT1,DNMT1,BBS1,PPM1G,POT1,PPP1R8,SGTA,TOMM34,DNAJC10,DTX2,CKB,NEMF,CCDC6,PNN,PPP1CA,MAEA,NIPBL,GORAB,ATP5B,CHCHD3,SCGN,INTS12,UTP3,ROCK1,PPP1R11,PRDX2,ZFP36L1,SH3PXD2A,RPL32,TPPP,CREB1,COL16A1,SMARCA4,RPL31,RPP21,STX18,SAP30,RPL35A,PISD,TAF10,ZC3H6,PIP,BLOC1S5,RABGAP1,EIF5B,PSMD4,C…
0.00413186527199045	POLG2,PPP2CA,ATF2,PDE4DIP	BCAR1,U2AF1,ZC3HAV1,UTP20,CEP135,PHLDB1,RABGGTA,B3GAT3,G3BP1,GOLGA2,P3H3,RPL18A,POLG2,NEDD1,FAM122A,TRUB1,PPP2CA,APMAP,GPRC5A,SMAP1,SIK3,CBX3,PRAM1,VAV2,RALA,MDK,CNTRL,SDC1,PDK3,FLOT2,SENP3,DAPK2,CEBPZ,MOB4,CDH11,THUMPD2,TRAPPC2,DVL3,VSIG4,DHX33,OTULIN,MLPH,LSM1,CCDC28A,FBXO3,IREB2,EVPL,SNX27,SLC5A6,TNKS1BP1,PRR12,WASL,ARCN1,NCAPG2,PRMT1,NTAN1,NUDCD3,PTK7,WDR77,S100P,ICAM2,L3MBTL3,COQ8A,APBA3,AHC…
0.0027516520270888	PNN,SARNP,CCDC9	HDDC3,NDUFA7,GATAD2A,ZC3H13,SUMO3,SPOUT1,ZFP91,PTBP1,EIF3A,WASHC3,ZFP36L1,RABGAP1L,PNN,SMAD5,SZRD1,NFX1,EIF4EBP1,BOD1L1,SARNP,RCOR1,FAM107B,PDXP,COMMD10,DPH5,GLRX2,RPL34,RPL35A,RPL28,PPP1R18,PIN1,MED22,SETD2,COX17,CBLB,SNRPE,ACIN1,CCDC9,TCOF1,SMC1A,INTS12,SRRT,ZC3H14,MARCKS,ASNA1,TOM1,MED6,CTDSPL2,TXN2,CXXC1,ATG13,PHKA2,RNF126,ARPC4,CIR1,COX7A2,PPIA,HDGFL2,M6PR,NUDT16,LGALS7,ZNF330,DAZAP1,RALA,SE…
0.0027516520270888	THOC7,PNN,CCDC9	SMC1A,PPP1R12C,ZFP91,GATAD2B,THOC7,SAR1A,SUMO3,UBN1,MARK2,SMAD5,HNRNPDL,HGS,ZNF787,ZC3H4,PNN,CLTB,RPS18,SRSF3,COMMD3,CRKL,MARK3,RBBP6,RANBP9,CCDC9,DPH5,GPATCH8,SLTM,SRSF7,MAEA,ZNF638,RFX5,SH3PXD2A,TPRKB,SZRD1,TBCA,RBM14,KIAA1143,SGTA,RSRC2,MAX,ACTB,ELOA,RPE,NDUFA7,CHMP1B,PRPF6,RTCA,BOD1L1,PPP1R2,VPS39,NDUFV2,SNRPE,SMC3,TBPL1,RBM6,ATP5B,CNBP,GID8,MARCKS,PRRC2C,RHOA,SNX9,C10orf76,DCTN4,FAM76B,BGN,U…
0.0045809224202325	MVB12A,NOLC1,CBLB,EGFR,VCAM1	SMC1A,SUMO3,PCNP,NDUFA11,MARCKS,CLTB,MAEA,GATAD2B,ELOA,MARK2,ASNA1,HGS,ZNF787,ZFP91,SAR1A,PRRC2C,SRSF3,YBX3,ZFP36L1,ATXN2L,RBM6,MFAP1,MVB12A,TAMM41,HNRNPDL,FTSJ1,NDUFS3,SMARCB1,PTBP1,THRAP3,RPS26,UBQLN1,COX17,DNAJC8,LAMA5,CAMK2D,RPL28,NOLC1,MX2,BPIFB1,DDA1,ATXN3,OPLAH,BDH1,KIAA0907,YPEL5,KANSL2,MKRN1,EFHD2,CUL3,REEP6,DCTN3,TSC1,CCDC25,CFB,SUMO1,CBLB,ROCK1,UBXN1,ATXN1L,OAS2,AGRN,CDC42EP4,TYW5,TRIR…
0.0045809224202325	SETX,PDCD6IP,PPA2,MED4,DPH5	ZNF787,HGS,TPRKB,GID8,TUBA1C,RBBP6,SERBP1,BOD1L1,SDE2,NDUFA7,MARK2,SUMO3,PNN,UBQLN1,DDA1,EIF4B,RCOR1,SETX,SAR1A,ZNF24,CNBP,COMMD3,SLK,TBCA,DNAJC8,SP3,GATAD2B,AP3M1,RPS26,RABGAP1L,UBAP1,ACTBL2,CHMP1A,RACK1,ELOF1,MED21,RPSA,PDCD6IP,PPA2,QARS,STAU2,TRAF6,RABGAP1,DIP2C,AIMP2,MXRA7,FBXW9,AIMP1,CANX,SH2D4A,UBXN2B,HSP90B1,COL1A1,AGPAT5,FAM89B,MED4,ARNT,GPHN,PKN2,CDK6,PPP1R12B,PRRC2C,ERF,EEF1AKMT2,CENPV,…
0.00236339308988714	CD3EAP,POLR1E,POLR1B	SMC4,CD3EAP,NKRF,RPL12,MSH6,POLR1E,DNMT1,ADH5,MTPAP,DDAH2,POLR1B,UTP15,TOP1,MRPS6,POP1,COA7,DYNLT3,SMARCA5,SMC2,DDX21,ADNP,MCM6,PLRG1,EMC4,NOC2L,MCM5,CP,REXO4,GPATCH4,NAA50,HYI,DNMT3A,INTS5,CEBPZ,CKAP5,UTP4,RPS6KB1,GNPDA2,MYBBP1A,CRYL1,NRP1,PURA,SERPINF1,SCRN2,SYMPK,PES1,AKAP8,RNF20,DCAF13,TOP2A,ORM1,PCLAF,GNL2,ANXA5,RBM17,BTD,FBLN5,AKAP13,EIF4G1,MYCBP,RPL7L1,MPHOSPH10,DHX57,SERPINA10,COIL,CHAF1B…
0.00854121907456476	CTDSPL2,CDC42BPA	MFAP2,STRBP,ARPIN,PRDX2,PDCL,NUCB1,GLRX2,RPL13A,ENAH,SEC61A1,TMEM63A,ATP5O,BRAT1,POLA2,SMG8,REEP4,CKAP4,ZBTB8OS,TOR1B,MEAF6,MRPS31,SWAP70,RPS27L,RPN1,ENOPH1,PTPRF,ACTR3B,BACH1,MRPL23,ARF5,USP13,GALNT2,RPS5,SCAI,GNPTG,VKORC1,SIN3A,RPS9,PEAK1,BRAF,NEDD4,GANC,GALNT7,IRF2,TARS2,GLUL,TAOK3,MRPS22,C18orf25,JUNB,XPO4,STK17B,CCDC50,MRPS10,RAPGEF1,ARF6,ANKRD52,UBE2F,PLIN2,OXSM,APIP,TEP1,ECHS1,DHRS11,S100A…
0.00421745599469918	CKS1B,CDK1,RACGAP1,GTF2E1,EZH2,USP32,CKS2,FEN1	CKS1B,CHCHD1,CHAF1B,DNAJC2,ME2,HSD17B8,RFC4,CDK1,SHMT2,IFT80,DDX5,DHTKD1,GPT2,SND1,MCM3,EMC2,RACGAP1,PTBP2,PBK,PURA,UBR1,ASNS,AGAP1,SLC4A1AP,PRIM2,CISD1,KRT19,ADH5,DCAF13,FAM114A2,KIF4A,MRPS35,KIF2C,GTF2E1,PRDX4,RETREG3,PITRM1,PTPN13,PDGFRB,EZH2,OTUD6B,CPNE8,TPX2,IFT172,DDX39A,LUC7L2,PCMTD1,RPL5,FYCO1,PUM3,CLK3,PUS7,SLC27A2,ANP32B,CLUH,PHGDH,DYNC2H1,TTC28,MFN1,RAB27B,TRIM2,CA13,MMP2,ANLN,TFB2M,FR…
0.0068687717844557	CDK12,CCNK,TBCB,ERBB2	CDK12,MIEN1,TOP2A,FBLN5,CSTF3,GRB7,MATR3,SMNDC1,ABCF3,SYMPK,BYSL,CAPRIN1,AGT,CA3,ACAD10,DNMT1,PHF6,CCNK,TOP1,BOP1,CMC2,CTDSPL2,ANKRD17,SON,PPP1R10,BTD,NAA15,PLCD1,TBCB,MFAP4,MYO1C,PRELP,UTP18,MRPL58,POR,GATB,PODN,FGFR1OP2,STAT1,STK38L,MTR,BCS1L,C17orf80,PTPRS,RABGAP1,INTS6,RBM25,TAB3,APOC3,ZNF598,RNF146,F2,ZMYND11,PRPF6,COA7,RUNX1,ANXA2,WIPF2,SLC39A10,STAT2,PIP5K1C,CSTF2,MKNK1,IWS1,APOC4-APOC2,AL…
0.000922630374864211	SNW1,BCLAF1,ELAVL1,CDK12,WEE1	SRRT,ATXN2L,GATAD2B,MEPCE,STRADA,PCNP,YBX1,ARID1A,PRRC2C,PNN,ZFP91,SNW1,ZNF787,RPS21,RPS26,YLPM1,GSTM2,SLU7,ZC3H18,MEN1,RTF1,ATP5J,BCLAF1,MAEA,GPATCH8,PPIE,ACIN1,CPSF7,CLTB,SMC1A,PHF5A,RBM14,PRPF6,DNAJC8,SARNP,WDR4,COMMD3,SNRNP70,ACTBL2,SP1,RPS29,LBH,SERBP1,ZNF24,SCGN,IFT20,SRSF7,CWC22,PTMA,EIF3A,FEZ2,MRPS10,RNF126,SLTM,PSMD7,MAZ,SCAF8,CAPZA2,ZC3H4,PGM2,GGA3,ATP13A1,RPS18,MAN1B1,SEC23B,RPS27A,GRB…
0.0068687717844557	CDK12,CCNK,TBCB,ERBB2	CDK12,MIEN1,TOP2A,FBLN5,CSTF3,GRB7,MATR3,SMNDC1,ABCF3,SYMPK,BYSL,CAPRIN1,AGT,CA3,ACAD10,DNMT1,PHF6,CCNK,TOP1,BOP1,CMC2,CTDSPL2,ANKRD17,SON,PPP1R10,BTD,NAA15,PLCD1,TBCB,MFAP4,MYO1C,PRELP,UTP18,MRPL58,POR,GATB,PODN,FGFR1OP2,STAT1,STK38L,MTR,BCS1L,C17orf80,PTPRS,RABGAP1,INTS6,RBM25,TAB3,APOC3,ZNF598,RNF146,F2,ZMYND11,PRPF6,COA7,RUNX1,ANXA2,WIPF2,SLC39A10,STAT2,PIP5K1C,CSTF2,MKNK1,IWS1,APOC4-APOC2,AL…
0.00120485600400094	CDR2L,CDR2	DDX3X,CDR2L,SON,ZC3HAV1,EEF1D,ING3,SNW1,SMARCA4,PSMB3,POLR2A,WDR35,CEP44,PLRG1,INTS12,LARP4,EIF3G,SETD2,TBC1D10B,DTX2,MTA2,HSPA8,CCDC124,FLYWCH2,TMEM189-UBE2V1,HGS,CGGBP1,TWSG1,PHF5A,PTPN12,SF3B2,EMSY,PSMB4,SZRD1,TOP1,PPP1CA,PPP1R14B,RPS20,EPS15,IK,MCMBP,RPL18A,RRBP1,GPR107,SLAIN2,RBM14,MICU1,GALNT1,NOTCH3,RPS25,FTSJ3,MARK2,VGLL4,EIF4G1,AKAP8,ZNF638,ABCF3,ACSS3,WDR19,PPP1R12A,MBLAC2,FBXW8,TJP2,ST…
0.00109340250127915	SRP68,NOP56,GPATCH4,NOC2L,PES1	CHD4,EIF3C,PRPF6,RRP1,SRP68,SEC61A1,RBM25,TOP1,ELOA,NAT10,RRP1B,MYBBP1A,PNN,PDS5A,SMARCA5,SF3B1,NOP14,CLP1,NUP93,PPM1G,SETX,RBM26,WDR43,SMIM12,CABIN1,C2,NOP56,ABHD14B,NDUFV2,CWC22,RAB10,WDR36,RSU1,DKC1,DARS,KIF23,RBP7,UTP18,GPATCH4,YBX1,TGFBRAP1,PHC2,TAF5L,CLSTN2,RRP15,VWA8,LENG8,RBM17,SOS1,PYGL,CDH5,HNRNPDL,TARS2,UIMC1,SCAMP1,U2SURP,NEK7,DNAJC2,STX6,POLR2A,NOC2L,LUC7L2,IFT20,PARN,UTP3,SFPQ,YAP1,…
0.00782760806415637	SUMO3,CHAF1A,EIF3C,CDK2	SMC1A,ZFP91,SLTM,PNN,SRRT,EIF3A,ZNF787,SETD2,CCDC9,HGS,INTS12,RPS29,THRAP3,PSMA5,PPP1R12C,SERBP1,ACIN1,ZBTB14,MAEA,NOL8,SRSF3,SUMO3,NFX1,GATAD2B,PPCDC,PRRC2C,ZC3H4,CHAF1A,MED8,RBM5,DCTN1,EIF2S1,MCMBP,MAP7D1,HADHB,CNBP,SON,NOLC1,GPATCH8,HAGH,VPS25,KIF13A,LRRC41,DOCK9,EIF3C,NDUFA7,NLRP2,RRP8,ALYREF,RFC1,C3orf38,ZC3HAV1,DNMT1,SMARCB1,BBS1,STEAP4,TAX1BP1,MLST8,YTHDC1,RIOX2,GIT2,PRPF6,SFSWAP,CSN2,CHMP…
0.00782760806415637	SUMO1,CHAF1B,SQSTM1,DMAP1	ZNF668,BPTF,RBMX,HPGDS,VPS33A,C1orf122,MARCKSL1,SUMO1,RNF31,SLC9A1,YTHDF3,VPS16,SEC24A,ZFP91,BPIFB1,RAC1,PPP2R5A,ACAN,GTF3C6,PPAT,MAD2L1,RAVER1,URI1,WDR74,H2AFY,RGS3,CHGB,DDX59,LIMD1,SCLY,EIF3G,TRMT1,SCGN,CHMP1A,DNMT1,IK,RNASEH2C,PPP1R7,SMAD2,SAR1A,RMDN3,LIPA,POFUT1,CUL1,DSCR3,ACTR1A,NUDT18,ATP5B,CPEB4,ROCK1,TRIR,LSR,SRP19,CCDC93,NUP43,LSM6,TRIM47,SRCAP,CHAF1B,C2,LUZP1,PLGRKT,MGLL,CUTC,MAD1L1,ERL…
0.000172585057193098	YLPM1,ACTB,PRRC2C,THRAP3,SRRT,GATAD2B,SFPQ,SERBP1,RPS19,SMC1A,HNRNPA2B1,HNRNPH1,CHD3,SDCCAG3,SNRNP70,IVNS1ABP,API5,CENPV,PSIP1	SLTM,ZNF787,ZFP91,PNN,MAZ,YLPM1,PPP1R12C,ACTB,SCAF8,MFAP1,PRRC2C,THRAP3,PPIA,ZC3H4,PCNP,BOD1L1,EIF4B,UBL5,SRRT,GATAD2B,UBAP1,SFPQ,SERBP1,ZNF330,CCDC86,TCOF1,ZNF24,MED22,CCDC9,ATG7,RPS19,PPP4C,SRFBP1,SMC1A,HDGFL2,CHMP1A,PRRC2A,SETX,ZBTB14,COMMD3,COMMD10,GPLD1,NUP210,IGLL1,KLKB1,VCL,HOMER3,PELO,PLOD1,TNFAIP3,HSPB11,MAEA,ABAT,RPL39,NIN,UTP11,PPP1R13L,ACAP1,MARS2,VAMP8,FAM117B,BCHE,NID2,HNRNPA2B1,RFC…
4.69934111823166e-06	POLDIP3,RPL22,LGALS7,UBE2I,ZC3H18,ACIN1,SRSF3,KRR1,RPL28,BCLAF1,ATPIF1,MTDH,RAI1,PTBP1,RPS19,SRRT,SARNP,RPL31,EIF3A,EIF4G1,GATAD2B,PRPF6	POLDIP3,RPL22,EIF4G3,LSM6,NDUFA11,SP3,PTMA,ZC2HC1A,RNF181,NDUFV2,EIF2S3,LGALS7,UBE2I,GHDC,CRKL,ZC3H18,RBL2,SAFB2,REPIN1,COMMD3,MAZ,ACIN1,CLC,SRSF3,TUBB4A,ATP5E,KANSL2,RBCK1,CPN2,INTS7,CIAO1,CLTB,ALDH1B1,NAE1,ARL2BP,KRR1,MRPS15,ZNF460,RPL28,RXRA,C17orf80,BCLAF1,ATPIF1,CHKA,STAT5A,TOR1A,SNX33,LRRC40,FAF1,ZNF638,MTDH,RAI1,PTBP1,SNAP29,SRFBP1,RPS19,SRRT,RPL7L1,DNAJC10,HEXDC,SARNP,CHCHD1,CCT4,SEPT9,PA…
5.51239656088457e-05	GATAD2B,YLPM1,ACTB,SRRT,SMC1A,LUC7L3,SERBP1,THRAP3,RBM14,ARID1A,SFPQ,RPS11,PCBP1,RPS27L,SAFB,RPL29,RPL11,TUBB,SRSF7,CHD3	ZFP91,PNN,GATAD2B,NDUFA7,BOD1L1,YLPM1,ZNF787,MARK2,SLTM,MRPS18A,ACTB,SRRT,SMC1A,UBL5,LUC7L3,SERBP1,THRAP3,RPS26,CLTB,INTS12,MARCKS,MAEA,SMAD5,WNK1,RBM14,ARID1A,CHMP1B,SFPQ,SUMO3,UBAP1,ISY1,RPS11,CWC22,ATXN2L,PCBP1,TMEM189-UBE2V1,GGA3,STRN4,TNS1,PALM2-AKAP2,RPS27L,CCDC93,MSRB3,CHCHD3,RUFY1,UNK,CHMP5,HAGH,SNTB1,YME1L1,VCL,COA6,MAP2K1,SEPSECS,SAFB,HDGFL2,TCOF1,CNOT11,CCNT1,SCAF4,LRRFIP1,PTPRJ,RPL29,…
0.000832781403274385	NOLC1,PRRC2C,SRRT,ZC3H13,THRAP3,SFPQ,ZC3H18,YBX1,YLPM1,RBM14,GATAD2B,EIF3A,ACIN1,ACTB,FAM120A,PDCD11,CHD3,PGAM5	PRRC2A,SLTM,NOLC1,ZNF787,PRRC2C,MFAP1,DNAJC8,EIF4B,SRRT,PCNP,ZC3H13,THRAP3,BOD1L1,CLCC1,WNK1,SNRPE,MAZ,ACTBL2,CCDC86,VCAM1,ISY1,PNN,SFPQ,KIAA1143,ZC3H18,CHMP1A,YBX1,TARBP2,PSMB4,YLPM1,RBM14,GATAD2B,TMEM263,ZFP91,SLU7,EIF3A,COX17,EIF3M,TMEM189-UBE2V1,COPE,SAR1A,RBM6,PPP1R12C,GID8,CHMP1B,SRFBP1,ACIN1,ELOA,ACTB,IRF2,PPCS,CD74,CGN,AR,CRMP1,FAM120A,PDIA5,ANXA1,RAB5C,TUBA1C,ADD3,ERP44,AHNAK,NDUFA12,MTM…
0.000832781403274385	GATAD2B,ZC3H13,SMC1A,GAPDH,EIF3C,PPP1CC,EIF3A,SRRT,SAFB,SAP18,LUC7L3,CHD3,ALYREF,RPL36,SRSF3,SRSF7,CENPV,MATR3	SLTM,PNN,PPP1R12C,PCNP,UBAP1,ZFP91,SUMO3,GATAD2B,BOD1L1,CWC22,SDE2,HDDC3,SETX,ZNF787,CDKN2AIP,ZC3H13,UBQLN1,UNK,SMC1A,MARK3,ACTBL2,RSBN1,ZC3H4,GAPDH,WNK1,USF2,SCAF8,RACK1,EIF3C,SETD2,DDA1,MZT1,VEZF1,RCOR1,CENPB,CREBBP,CLTB,AP3M1,XRCC1,CHMP4A,LANCL2,PPP1CC,EIF3A,RPL35A,ZC3H11A,BPTF,PSMA5,SRRT,ZRSR2,SAFB,NSMCE3,NECTIN1,SAP18,LUC7L3,CELF1,KIF13A,PARN,ANXA1,BLOC1S1,CHD3,F11,OSBP,MAP7D1,ALYREF,GNL1,SI…
0.000832781403274385	GATAD2B,SMC1A,PRRC2C,EIF3A,PTBP1,SRRT,THRAP3,SFPQ,FNBP4,SERBP1,RBM14,RBMX,RPL28,SRRM1,RPS7,HDAC2,KRI1,EIF4A3	GATAD2B,PNN,SMC1A,MARCKS,ZFP91,PCNP,SUMO3,PRRC2C,MARK2,BOD1L1,EIF3A,PPP1R12C,HDDC3,MARK3,INTS12,SLTM,UBL5,CLTB,CENPB,ZNF787,PTBP1,NDUFA11,SRRT,ZC3H4,PPIL1,THRAP3,GPATCH8,RBBP6,SFPQ,LRPAP1,PHF5A,FNBP4,TCOF1,SERBP1,RBM14,VPS8,RBMX,PADI4,IDNK,NECTIN4,MKRN1,C1QC,ATXN3,ZNF609,NAP1L4,ELP4,CIZ1,CALU,SUCLG2,CPNE8,CISD3,SETX,EIF3E,ZFAND6,TGFBRAP1,NDUFA13,AKAP1,RPL28,SRRM1,RBL2,RPS7,IFI35,MTMR6,TNIP2,PECR,…
0.000172585057193098	SRSF3,ZC3H13,EIF3A,GATAD2B,BCLAF1,RPL22,GATAD2A,RPSA,RPLP0,SMARCB1,RPS20,ARID1A,SARNP,ENO1,LUC7L3,EZH2,SDCCAG3,FUS,DDX51	WDR33,SUMO3,SRSF3,POLR2E,ZC3H13,NCBP3,EIF3A,ZNF638,GATAD2B,MRPS18A,MAEA,SP3,MARCKS,PPP1R12C,MFAP1,ZFP91,MAZ,CPSF2,LBH,HGS,BCLAF1,BOD1L1,SMAD5,ACTA1,CLTB,GRN,EIF4B,PCNP,RSRC2,RPL22,GATAD2A,EPS15,RBM33,COPS8,PSMD12,STAM,GMEB1,RPSA,SLTM,LAMTOR2,KLHL42,ZBTB7B,STIM1,MARK2,RFX5,RCOR1,RPLP0,DAZAP1,LAMTOR3,ROCK1,CHMP1A,UBA1,ZFP36L1,SMARCB1,RPS20,PPP4C,ARID1A,RBBP6,APRT,FAM192A,PDS5A,LRPAP1,LASP1,DNAJC8,X…
5.51239656088457e-05	SFPQ,YBX1,SERBP1,PRRC2C,RPS5,SNW1,FNBP4,ZC3H13,YLPM1,BCLAF1,SMC1A,EIF3C,SRSF3,RBM15,CREB1,SCAF11,SRSF7,KPNB1,SENP1,KRT14	SFPQ,YBX1,RAP1A,EIF4B,APC,SDE2,SERBP1,ELOA,RBM6,PRRC2C,SETDB1,CEP131,PRRC2B,RPS5,SNW1,ZNF638,SURF6,ZNF787,RPL35A,TBCA,FNBP4,ZC3H13,PDSS2,CLIC4,YLPM1,DUSP3,PBDC1,GLG1,NDOR1,TRIR,CTU1,PGLS,SLTM,MARK3,AK6,RALY,JMJD1C,PPP1R12B,BCLAF1,HGS,SMC1A,NUDC,MED6,ATRX,SRFBP1,MED21,PHIP,CABIN1,INO80E,EIF3C,SRSF3,KLHL11,PCNP,VAMP8,RXRB,RBM15,PEA15,AP5M1,CREBBP,NFX1,PNISR,PPCDC,PSMD9,TRNAU1AP,CDA,RNF214,PNN,RFXAN…
1.99178091073758e-06	DDX23,CHD4,RPS18,PRPF6,PDCD11,PRKDC,DDX3X,DNMT1,USP36,UTP18,RPS3A,SAFB,PPP1CC,BRD2,RPS19,SIN3A,RPS5,DDX52,HNRNPA2B1,SRSF7,GNL3,SRSF9	BPIFB1,MARCKSL1,DDX23,CHD4,IRF5,NAA15,RPS18,DRAP1,PRPF6,PDCD11,DOCK9,GPATCH4,GTF2E1,CCDC124,LSM6,ISY1,ILKAP,ARF3,CHMP1A,PRKDC,UBXN1,EDC3,DDX3X,SAMD1,DNMT1,PRRC2A,USP36,GTF3C1,TF,UTP18,RPS3A,HIBADH,ORM1,NANS,LSG1,SAFB,ESD,PPP1CC,BRD2,SUMO1,TXLNG,TIMM8B,POLR1E,ACSS3,ALDH1L1,RPS19,NOSTRIN,KIF2A,MAD1L1,NBEAL1,SIN3A,MAP7D1,GALNT6,RAPGEF6,ATP6V1B2,UPF3B,EMC4,VBP1,MRPS25,PPIL1,RPS5,DDX52,STMN1,MTIF2,WDR…
0.0026414063166927	MFAP1,USP36,SERBP1,SRRT,RPSA,NOLC1,SAP18,BCLAF1,UBE2I,SCAF11,NOC4L,RPS27A,ZCCHC8,RPS20,SNRNP27,SRRM2	UBAP1,RBM6,SMAD5,MFAP1,ZC3H13,HDGFL2,CHMP1A,HGS,USP36,SETD2,MAZ,SLTM,BUD13,COMMD3,SCAF8,SERBP1,NDUFA7,SRRT,VEZF1,RPSA,NOLC1,FAM76B,RBBP6,NOTCH3,PPP1R2,SETX,BLOC1S5,YBX1,C5orf24,NIT1,ZFP91,SAP18,SNRPE,UBQLN2,PPCDC,AKTIP,RBM33,CENPB,BASP1,UBQLN1,GLB1,BCLAF1,CAST,TPRG1L,UBL5,UBE2I,PPP1R12C,PCNP,ZNF787,BOD1L1,SCAF11,PGLS,BLNK,CHMP2B,CCDC9,CAPZA2,ARMC1,NOC4L,WRAP53,MRPS18A,TXLNA,C19orf53,TRIR,WDR33,GD…
2.61713011364053e-05	PRPF6,SFPQ,EIF3C,THRAP3,PNN,CHD4,UBTF,NOLC1,NOP14,FNBP4,SMARCA4,XAB2,LARP7,EXOSC10,KRI1,SAFB,HSPA5,SRP68,TRIM25,MATR3	PPM1G,PRPF6,SFPQ,EIF3C,ELOA,LSM3,DDAH2,RTF1,HMGB2,POLR1B,THRAP3,RXRB,GOLGA5,PNN,PTMA,CHD4,NFKBIB,CSTF2,PEA15,MEPCE,HIBADH,CCDC47,FBXO28,SMIM12,MOB1A,NMRK1,CCDC9,UBTF,NOLC1,NOP14,CENPB,FCHO2,GSTP1,NCBP3,FNBP4,CLCN7,OPLAH,MIB1,MEN1,ZNF460,FHL1,SMARCA4,PYDC1,XAB2,KPTN,MMP14,ZMYM2,KDM2A,LARP7,OPA1,NQO2,CUL4A,DIS3L2,SLTM,REXO2,EXOSC10,AKR1C2,DBR1,KRI1,SPAG7,UTP15,ATRX,SDHB,SAFB,HSPA5,PFKP,SRP68,TTC19,…
8.66789980482018e-05	SLU7,SAFB,PRRC2C,NOLC1,ZC3H18,PTBP1,EIF3A,ACTB,MFAP1,SAP18,HTATSF1,U2SURP,FABP5,TCOF1,THRAP3,PIP,LUC7L3,G3BP1,SRSF6	ZNF787,TPRKB,BOD1L1,SLTM,UBQLN1,SLU7,PCNP,SAFB,ZC3H13,UBL5,PRRC2C,PPP1R12C,NDUFA11,UBAP1,RPL35A,TRIR,NOLC1,ZC2HC1A,ZC3H18,ERC1,PTBP1,EIF3A,NFX1,RACK1,PSMB4,CHMP1B,VEZF1,ACTB,CWC22,KIAA1143,PCBP1,RPL28,BRPF1,PPP4C,HGS,C1QA,MFAP1,RBBP6,ZNF330,SRSF2,SAP18,ARGLU1,ARHGAP15,RRP8,ZFP36L1,COX17,ALDH1L1,YWHAH,DHRS2,HTATSF1,SYNPO,SNRPG,CENPB,LRPAP1,SERPINB5,DNAJC8,SUMO3,U2SURP,SWAP70,FABP5,DRAP1,CDK7,NDUFA…
2.61713011364053e-05	NOLC1,EIF3A,PNN,ACTB,GATAD2B,THRAP3,BCLAF1,SERBP1,SAP30,RPL26,SAFB,RRP12,TCOF1,MFAP1,SAP18,PRKDC,SF3B1,SNRNP70,LUC7L3,SRSF7	SLTM,ZNF787,CHMP1B,UBAP1,NOLC1,EIF3A,PNN,ACTB,ZC2HC1A,MARCKS,RPS26,RPL35A,ZNF330,RBM6,GATAD2B,THRAP3,PSMB4,RABGAP1L,GPATCH8,BCLAF1,SERBP1,BASP1,SET,USP14,SRSF2,SAP30,SUMO3,RPL26,ALDH1L1,SAFB,HGS,HPRT1,RRP12,BRPF1,TCOF1,APOL1,TCERG1,MBP,APOA2,MFAP1,RRAGC,RHOT2,ZC3H13,POLR2I,CYB5R2,MAP7D1,BCAP31,RCSD1,COA6,POLG2,PAIP2,ALG5,ARRB2,SNUPN,NUMB,CARTPT,SAP18,PRKDC,NEDD4L,CLCN7,ALYREF,GABARAP,ENAH,SAR1B,P…
1.99178091073758e-06	SRRT,FNBP4,SNRNP70,ZC3HAV1,GATAD2A,EIF3A,PRRC2C,PNN,MFAP1,YLPM1,TPR,RBM14,SAP18,RPL22,SERBP1,KRT77,BRD4,RPL30,PCBP2,S100A7,SF3B1,DDX39B	SRRT,FNBP4,SNRNP70,ZC3HAV1,GATAD2A,EIF3A,PRRC2C,PNN,MAZ,SAP130,ELOA,RTF1,MFAP1,MAEA,YLPM1,TPR,SP1,UBQLN1,RBM14,SAP18,NIPBL,ZNF787,RPL22,SERBP1,PTMA,WDR33,KRT77,NMRK1,CARTPT,IRF2,MYL12A,GPALPP1,DHRS11,ACTBL2,FBXW2,MAX,PDAP1,RBM26,PRRC2A,BLOC1S5,UQCRQ,CRYM,VPS39,ISY1,BRD4,MEPCE,ALDH1A1,ZFAND6,RSRC2,SCGN,HIST2H2AB,CUTA,CHMP1A,RPL30,PCBP2,S100A7,HSPB1,RFK,TSC22D3,ATPAF1,NDUFS1,TCAF2,DEF6,CORO1C,NARS,…
0.00595794456993284	BRD2,BCLAF1,PNN,RBM14,UBE2I,HNRNPDL,PRPF6,YLPM1,TPR,SPEN,EIF3F,ANXA2,LEO1,TCOF1,RBM10	PRRC2A,VEZF1,ZRANB2,CHMP1B,BRD2,VPS4A,YBX1,INTS12,KCTD21,DNAJB12,RPS29,SH3BGRL3,COMMD10,BCLAF1,NAPA,RACK1,CTDSPL2,PNN,APOH,YME1L1,RBM14,UBE2I,HNRNPDL,TOMM5,PRPF6,HGS,NDRG3,GALM,CABIN1,ZFAND6,C19orf70,SAR1A,YLPM1,ZDHHC5,CHMP1A,C5orf24,PPIE,FAM129B,DUS3L,PHF5A,ACTR1B,CCS,SEPHS1,KYNU,ERCC5,MRPS15,S100A11,PBDC1,ATP6V1B2,NMRK1,POP7,EXD2,CDKN2AIP,TBCA,TPR,SPEN,PSMA7,ZNF330,LRRC41,PYM1,HDGFL2,S100A4,EIF…
2.61713011364053e-05	EIF3C,RBM5,FNBP4,SF3B1,PRPF6,NCOA5,SLU7,SERBP1,RPL17,RPS15A,SNRNP70,BRD4,SDAD1,EIF2S1,SMARCE1,SNW1,DDX46,RPS9,S100A7,RBM15	EIF3C,RBM5,CWC22,SETX,TAB3,CCDC12,ELOA,GNB2,FNBP4,PPM1G,LSM3,TTR,CABIN1,SERPINB6,SLTM,SF3B1,PRPF6,YBX1,NDUFA13,ACTA1,HMGB2,DRAP1,NMRK1,LSP1,MARK2,NCOA5,KDM6A,SLU7,ELL,GSTM5,PEA15,SERBP1,RPL17,NCBP3,RPS15A,CREB1,SNRNP70,SEPT2,EHD3,BRD4,ZFP91,TANGO2,SSBP1,HIST1H3D,RAPGEF1,SEPHS1,PTMA,SDAD1,UNG,NHP2,CD93,CISD2,RBM33,GSTM2,EIF2S1,POTEF,SMARCA1,PAWR,SMARCE1,SNW1,CNOT3,DDX46,HPF1,SS18,PLCG2,NUDT16,ATG9…
0.00595794456993284	BRD2,RBM5,ZNF638,PRRC2C,BCLAF1,TPR,THRAP3,TCOF1,ZFR,SERBP1,YLPM1,ARID1A,SLU7,SAP18,ZCCHC8	BRD2,RXRB,RBM26,RBM5,ZNF638,PRRC2C,ZNF460,BCLAF1,TPR,ATG4B,NDUFA11,ZNF579,MIB1,ATXN2L,XRCC1,BBS1,DNAJC7,YBX1,THRAP3,ELP4,TCOF1,FAS,GALK1,RNASEH2C,PDS5A,RECQL5,PHF3,REPIN1,WDR33,SAR1A,NDUFS6,ZFR,SERBP1,MEPCE,BPTF,ZC2HC1A,ZNF787,YLPM1,UTP3,KDM6A,KIAA1143,ATRX,ZFAND6,CNBP,GPATCH8,MRPS15,TBCA,ZFP91,UBAP1,CNOT7,PPP1CA,TXLNA,ZNF143,ARID1A,USF2,RREB1,CKB,OTUD4,ZC3H4,NIPBL,PIH1D1,SLU7,BASP1,AIDA,AMDHD2,P…
0.00128247091770809	GATAD2B,PRRC2C,PTBP1,SRRT,SMC1A,TCOF1,ACIN1,SLU7,PNN,BCLAF1,ATP5B,MTA2,GATAD2A,FTSJ3,PRPF40A,SUB1,NPM1	MARCKS,PCNP,GATAD2B,RBBP6,SUMO3,BOD1L1,PRRC2C,MARK2,PTBP1,ZNF24,UBAP1,UBQLN1,SRRT,HGS,SETD2,LRPAP1,RPS26,ZNF787,YBX1,NSRP1,CCDC9,SMC1A,ATPIF1,EIF1B,SZRD1,BLOC1S5,TCOF1,HDDC3,MZT1,ACIN1,ZC3H14,SLTM,SMARCB1,TBCA,ZC3H4,SLU7,PNN,CCDC86,ZFP91,BCLAF1,ZRANB2,ATP5B,EXOSC1,COA6,UBQLN2,UTP3,PPIL1,PXN,PBX1,ECHS1,RUFY2,NUMB,MTA2,TMEM189-UBE2V1,SUMO1,ANGPTL2,ATG9A,POP4,GATAD2A,VGLL4,CMC1,FTSJ3,LENG8,MGA,UBL4A…
8.66789980482018e-05	CHD4,SLU7,SAFB,SMARCA4,NOP14,PRPF8,ZNF638,SF3B1,BYSL,SRP68,HTATSF1,TOP1,PNN,ZC3H18,ZNF598,EIF4G1,ZKSCAN1,USP39,CCAR1	CUL4B,BUD13,CHD4,SLU7,PGLYRP2,SEC61A1,DHRS11,APOC3,SURF6,SEPT2,POP1,OSBPL11,SAFB,SMARCA4,VTI1B,MAGED1,MARC2,NUP153,NOP14,APOC4-APOC2,PRPF8,TATDN3,TTR,AIDA,YIPF5,ZNF638,INPP5K,CCDC12,IGFBP4,YTHDF3,ZFP91,DAPK1,BORCS7,APOH,RPIA,RNASEH2C,SF3B1,ACTA1,ELOA,KIF5B,XPA,NDUFA2,YBX1,TAB3,RECQL5,SLIT3,BYSL,SRP68,ZCCHC6,PSMB3,HTATSF1,MED25,IFT22,PNISR,TOP1,ZMIZ1,POFUT1,PNN,RBMX2,INTS7,ZC3H18,NTPCR,NUP35,ZNF59…
0.00595794456993284	PRRC2C,EIF3A,BCLAF1,ZC3H18,RPL22,TCOF1,CPSF2,SERBP1,THRAP3,SLU7,PTBP1,RBMX,SAP30,STRBP,PNN	PCNP,BOD1L1,PPIA,PRRC2C,CHMP2B,RBM6,ZC3H13,SLTM,CLTB,SAR1A,BUD13,TMEM263,EIF3A,BCLAF1,PSMB4,SUMO3,RBBP6,ZC3H18,MARCKS,CHMP1B,PPIL1,PPP1R12C,RPL22,TCOF1,UBL5,CPSF2,HGS,ATP5D,SERBP1,UBQLN1,ZFP91,THRAP3,RCOR1,SETD2,CNOT7,ZNF787,RACK1,SLU7,SRFBP1,PSMD14,PTBP1,GNB2,FCHO2,MAIP1,ILKAP,DSCR3,DCTN4,EVI5L,RBMX,SNTA1,YTHDC1,C6orf132,SUMO1,SAP30,TGFBRAP1,SLC16A3,CTCF,NCBP3,MTURN,ZRSR2,FAH,PDLIM5,RPL35A,INTS1…
8.66789980482018e-05	RPL5,SRP68,U2SURP,RBM14,RPS2,GATAD2B,USP39,EIF4G1,SRSF9,KMT2A,PABPC4,CAPRIN1,EIF3C,RPL27A,SF3B2,RRP1B,XAB2,PHF6,HNRNPA3	GTF2E1,CPB1,UBE2V2,RPL5,ELL,ZC3H15,SRP68,OSBPL11,EIF5B,TTC9C,U2SURP,RBM14,MAN1A1,ZNF706,IFT80,DARS,STIP1,RPS2,ELOC,C12orf57,SLC4A1AP,GATAD2B,CHMP3,USP39,BABAM2,CYR61,EIF4G1,ACSS3,SRSF9,KMT2A,RANBP2,PLAT,SH3GLB1,DNAJC7,SENP1,MKRN1,PABPC4,IVNS1ABP,USF2,FCER1G,UTP11,RSRC2,MAP1B,MAD1L1,RNF40,LSM6,ALKBH4,CAPRIN1,ILKAP,EXOSC1,TTR,SMIM12,EIF3C,SLBP,MED6,FBXL6,RPL27A,PCBP1,PSTPIP2,HUWE1,SF3B2,EXOSC6,LARP…
7.4362373995166e-06	PNN,EIF3C,RBM14,PRPF6,GATAD2A,YLPM1,SRSF3,MYBBP1A,RBM10,NCL,PES1,ARID1A,ACTB,ZNF638,LEO1,FNBP4,EIF4G1,LARP7,UTP18,JUP,MTA2	PNN,PTMA,EIF3C,RBM14,HPX,PRPF6,GATAD2A,YLPM1,SRSF3,SLC16A3,GDI1,RTF1,PPM1G,MARK2,C7orf43,CAPZA2,MYBBP1A,ELOC,RBM10,NCL,NDUFA13,HIST1H3D,TTR,SETX,LSM5,SH3BGRL3,CCNT2,WBP2,AGT,PES1,DPM3,ARID1A,PHF3,DDA1,SPINT2,SMIM12,CD46,SETD3,ACTB,HAUS2,RPS26,CLP1,BPIFB1,GNB2,ZRANB2,CES1,ZNF638,LEO1,SRFBP1,FNBP4,USF1,RAB5B,CSNK1A1,PDCD2L,NSMCE1,PGM5,RAB5A,CLIC4,NUP153,RBL2,EIF4G1,LARP7,NPC2,METTL18,CYB5R2,UTP18,P…
8.66789980482018e-05	MTDH,RBM14,LUC7L3,ZFR,HNRNPL,KRR1,LTF,RPL10A,VCAM1,KRT77,RPL22,CLIP1,SNRPF,THRAP3,DDX3X,RPS5,ZNF638,BCLAF1,XAB2	WDR33,WTAP,DIDO1,CWC22,EPS15L1,ATRX,MTDH,DHX33,RBM14,MSH6,TMED5,SEC62,VAV1,GYS1,APMAP,MYO1C,PAIP2,CYR61,LUC7L3,EIF2A,PHGDH,FGL2,ATP5L,RBX1,ZNF629,TYMP,ZFR,CAPZA1,MIB1,WASHC3,HNRNPL,ERP29,PPIL1,CBR1,MBOAT7,ELAC2,ATG4B,KRR1,KIAA0513,LTF,RUFY2,RPS29,PHF3,C14orf166,TMEM11,LBR,DPH5,RPL10A,CHAMP1,SLC25A11,SMAD2,ROGDI,POLR2J,GALNS,TPI1,SMAD3,APEX1,C1orf52,VCAM1,RTL8C,CHMP2B,CCDC50,RAB5A,APC,KRT77,ZNF687…
2.61713011364053e-05	EEF1A1,SRRT,SMARCA4,SNRNP70,LUC7L3,CHD4,PRPF6,UBTF,PRRC2C,MTA2,NCOA5,ZNF622,SAFB,MFAP1,TRIM27,THRAP3,ZFR,DDX24,IK,YLPM1	CDKN2AIP,YBX1,SUMO3,ELOA,RNF40,MARCKS,EEF1A1,ATP5D,PPP1R11,TXLNA,UBL5,SRRT,RPS29,UBP1,SMARCA4,SNRNP70,NCALD,LUC7L3,LRG1,NUDT16,INTS12,ATXN2L,MRPS18A,SMIM12,CMC4,PPIA,NUP43,ACTA1,TMEM189-UBE2V1,HDDC3,CHD4,MED21,ZMYND11,PRPF6,UBTF,MARCKSL1,PRRC2C,CWC22,MARK2,HMGB2,SUMO1,MAP7D1,HGS,CPNE2,GPT,RUFY1,EEF2K,MTA2,GCC1,APOH,TRIM4,FGA,ALDH1L1,ZNF579,COA6,ITIH3,RAB30,EIF2S3,CFD,EVI5,CNPY4,CHCHD3,GNG5,NCOA5,…
0.000269658229130604	CHD4,PRPF6,SRP68,SF3B1,USP39,SART1,XRN1,ZNF638,KDM1A,BRD2,EIF3C,SMARCA5,PNN,H3F3A,SFPQ,SERBP1,WBP11,ADNP	CHD4,RAPGEF1,PRPF6,SRP68,ACTA1,APOH,COA5,UBE2G1,TANGO2,SF3B1,EIF1,DNAJB12,MRPS24,APOC4-APOC2,NUP35,RIOK1,USP39,EPC1,TF,ANXA5,FETUB,TOMM20,SYMPK,COPG2,SERPINF2,MAGED1,CCDC174,SART1,PAIP2,XRN1,ZNF638,UTP3,MTFR1,XPA,PCOLCE,KDM1A,CUL4B,PPM1G,ZNF609,ARHGAP24,LRWD1,ERCC5,ZNF579,MAN1A1,BBS1,FBXO21,KXD1,BRD2,ASCC3,GPATCH4,SERPINF1,GPD1,VAMP8,CCDC22,SERPINA6,ELL,ZNF207,RPL13A,EIF3C,WISP2,SMARCA5,EAPP,AHNA…
0.00595794456993284	HNRNPDL,ZC3HAV1,THRAP3,PNN,RPS19,SNRNP70,RPL26,CHTOP,ATP5B,DNMT1,PRPF6,MYL6,RPL23A,POLDIP3,SAP30	INTS12,RBM26,SUMO3,CTSD,HNRNPDL,ATXN2L,MAEA,TRIM14,SUFU,CDKN2AIP,JUNB,NCOR1,TSC1,CLEC16A,RPS29,TXN2,ZC3HAV1,ZFAND6,THRAP3,PNN,MAP4,RNF113A,C5orf24,EIF1,CTDP1,CABIN1,NUMB,NDUFS6,NEK7,RPS19,RBMS1,SNRNP70,RNH1,RPL26,CHTOP,ARGLU1,RPL28,ATP5B,MRPS5,INO80E,VPS53,DNAL1,TROVE2,PCNP,XPO6,ACTBL2,FBXL18,BASP1,PPP1R2,BPIFB1,MARK3,CHMP1A,CCS,ASNA1,DNMT1,EXOSC6,SETX,RANBP9,EHMT1,CCDC186,CHMP2A,EP400,NUBP1,EXOS…
7.4362373995166e-06	KNOP1,SRSF3,SAP18,SART1,RBM34,PHF6,ZFR,TCOF1,BRD4,BCLAF1,SRRT,MFAP1,SNRNP70,PRRC2C,RPS3A,YLPM1,PES1,GNL2,TOP2B,FUS,CHD4	KNOP1,ZC3H4,TAOK2,YBX1,NFX1,JUND,ZNF460,PNISR,SRSF3,CASC3,CNBP,ZNF24,PON2,SAP18,SART1,RBM34,FAM32A,LHPP,ISY1,SNRPG,XPO6,MEF2D,COMMD7,PHF6,CIR1,STAM2,RBM33,FCHO2,COX4I1,REEP4,CEP44,SP1,AP5M1,ZFR,ROCK1,LSM3,RNASEH2B,TCOF1,FBXW8,BRD4,TRIR,RXRB,RPL32,REPIN1,BCLAF1,YTHDC1,UHRF1BP1,LPIN2,ZNF787,DPM3,ZFP91,RCHY1,GLCCI1,CTDSPL2,SRRT,ADO,TTC5,SCAF8,PDZD11,TMEM263,COPS5,WTAP,SNRPB2,NUP50,MFAP1,RMDN3,SNRNP7…
0.0026414063166927	PRPF6,TPR,NCOA5,BANF1,TBL1XR1,SNW1,PNN,PRPF40A,ARID1A,WBP11,PHF14,EIF3C,SERBP1,TRIM28,NOP58,HNRNPA1	FAM76B,FBXO28,NIPBL,CTDP1,PRPF6,SRCAP,TRAFD1,CTCF,APOC3,HMG20B,YBX1,RXRB,ADH1B,TPR,PRRC2B,NCOA5,NKAP,SH3BGRL2,STXBP1,TRUB1,SP1,BANF1,MARK3,ELL,UHRF1BP1,RBP7,RALY,ACTBL2,TPD52,MRPS15,SMG1,ALDH1A1,TXN2,PDS5A,PTPRS,TBL1XR1,SNW1,BPTF,FAM32A,GPATCH8,TPPP,CSNK1D,ATRX,TRAPPC4,PDAP1,PNN,RETREG3,PEA15,RAVER2,CPNE2,PRPF40A,CSTF2,EDF1,ZNF579,ARID1A,SAFB2,EP400,STRADA,PON1,WBP11,EIF4E2,IGFALS,ZNF787,PCBD1,EH…
1.99178091073758e-06	RPS15A,PNN,SRSF3,PRPF6,YLPM1,RPS18,RPS5,SAFB,EEF1A1,SNRNP70,SMC1A,GATAD2A,THRAP3,SRRT,GATAD2B,SLU7,BRD1,LUC7L3,SDAD1,PDCD11,USP36,SMARCA5	YBX1,COMMD3,LAMTOR2,SP3,RPS15A,TDRD3,KLF16,DNAJA1,PNN,TPRKB,CNBP,PRRC2A,TOR1A,SRSF3,UBAP1,PRPF6,ZNF787,RNF126,SETD2,DSCR3,ME3,INTS12,PSMG3,ACTR6,RBM6,SLTM,ZNF574,YLPM1,STRADA,RPS18,RPS5,SAFB,IFT122,EEF1A1,NIPSNAP3A,BLOC1S5,SNRNP70,SMC1A,CNOT7,HGS,SUMO3,NSRP1,SRFBP1,NDUFS1,ZC3H4,SMIM12,CABIN1,ZRANB2,TUBA1C,MAZ,SZRD1,GATAD2A,BZW2,DNAJC8,BRWD1,THRAP3,RNF40,CWC22,XRCC1,PPA1,PPHLN1,MAP4K2,SRRT,GATAD2B…
0.0026414063166927	MYL6,ARID1A,TOP1,YLPM1,LGALS7,SRRT,HSPA8,VCAM1,NOP56,PTBP1,FMR1,PCBP2,ZC3HAV1,HSPA1A,TUBB,DDX55	PPIE,MYL6,ACTR1B,RPS26,STX17,TOM1,ARID1A,CLP1,LAMTOR4,TOP1,PSPH,NDUFA11,SEPHS1,ZNF787,YLPM1,RPL35A,TRIP10,TRIM3,LGALS7,DNTTIP2,FUCA1,GRHPR,PARP2,FPGT,SRRT,PEBP1,HSPA8,VCAM1,SH3PXD2A,HAUS4,CDA,MTR,NOP56,COA4,PTBP1,TPRG1L,BCL3,FMR1,C18orf8,SMN1,PCBP2,CSAD,TOR2A,ZC3HAV1,QTRT2,PRRC2A,HSPA1A,NAA25,CLMN,PLD4,SRFBP1,ERCC2,MRPL11,ERI1,MRNIP,MED24,UBN1,UFSP2,AAR2,E2F4,TPD52,TSTD1,NDUFA9,EPB41L1,AKR7A2,GSD…
0.0027084224554571	SRFBP1,BOD1L1,TCOF1,HGS	MAEA,CLTB,SUMO3,ZC3H13,NDUFA7,RPS29,RPS11,SRSF3,TMEM263,ZFP91,RBM6,RBM14,RPS18,RPL29,PNN,CCDC9,ISY1,COPE,SMC1A,HDDC3,COX17,PPIL1,SRRT,MARCKS,SRFBP1,PTBP1,GATAD2B,PHF5A,ZC3H18,RPL28,BOD1L1,TBCA,BLOC1S5,MAZ,RPS26,ARID1A,ZFP36L1,MARK2,TPR,SEPT10,SLTM,SRSF7,LDHD,ZC2HC1A,RNF181,ZC3HAV1,SARM1,JUP,YTHDC1,POP4,GTF2E2,MTA2,PFDN1,CNKSR1,TCOF1,BCLAF1,ADGRL2,CMC4,BOLA3,MBD4,CHD2,LAIR1,NME7,GARS,NPM1,HGS,GRHP…
0.0027084224554571	TCOF1,BOD1L1,MFAP1,ELAVL1	ZFP91,SETD2,TCOF1,SLTM,MRPS18A,THRAP3,MARK3,NFX1,MARK2,ZC3H14,BOD1L1,MZT1,PCNP,LAMTOR3,RBM6,PNN,TMEM263,MAEA,RPS26,NDUFS6,ISY1,SRRT,NDUFA7,SAP130,YBX3,RPS29,CHMP1B,ZFP36L1,EIF4B,ZC3H18,CMC4,SAR1A,PPA1,RBBP6,VEZF1,VPS39,HPCAL1,RBM14,UBAP1,PRRC2C,CCDC9,RSRC2,RPL35A,RPL29,MAX,PCBD1,ROCK1,ACTB,FCER1G,ZC2HC1A,MAZ,SRSF3,ZFAND6,ZNF24,BUD13,TBCA,RPL32,UBN1,PRRC2A,INTS12,BPTF,MFAP1,MED18,RCHY1,GDI1,SMAD5,…
0.00699622853986863	HSPA8,MAPRE3,SNRNP27,TACC1,ZNF598	FAF1,RPN1,OTULIN,PHGDH,ALDH1A3,HSPA8,MZT2B,TRIP13,BID,LRP1,RAP2C,KMT2D,PGRMC2,HSDL1,A1BG,ZNF706,NUDT4,MAPRE3,GOSR1,SP1,ATIC,ANAPC16,PRR5-ARHGAP8,SARM1,FBLIM1,TANC2,TMED3,ARSB,GNPDA1,RETN,ANO6,RAB10,TOMM70,SNRNP27,MGMT,ATP2C1,ACTR3B,GSK3B,NUCKS1,NCBP1,DPP8,PPP1R12C,RPS3A,SPC25,TPM4,LIN7A,PIP4K2A,PIH1D1,SBNO1,ARSA,REEP4,FAM111B,FUCA2,ORC4,TSC1,CHKA,GATM,RPS19,RBCK1,BRD9,NUDT15,HUS1,UBE2F,TBCD,IARS2…
0.000593812273837599	SRRT,ZC3H18,ACIN1,THRAP3,SON,SNRNP70	YBX1,CCDC86,SRRT,RBM6,HDGFL2,CNBP,SP1,SERBP1,EIF3A,SLTM,SAFB,PPIL1,ZC3H18,RBM26,RBMX,ARGLU1,NOLC1,ZFP91,MFAP1,PRRC2C,CDKN2AIP,ZNF330,RPL28,MICALL2,RPS19,SAFB2,EDF1,ACIN1,SAP18,ZRANB2,MARK3,THRAP3,RPL35A,RPL26,CLTA,SRSF7,CHMP1A,KNOP1,NDUFV2,AKAP13,REEP4,MAD1L1,ALOX15B,RPS16,ZC3H13,MAN1A1,ZC3HC1,CTU2,RABGAP1,SSR2,GABARAP,TIMMDC1,GCC1,SH3BP4,PDE6D,AKTIP,HMOX2,RBM14,ACTBL2,CLN5,SUMO1,PLCB4,TCERG1,FAB…
0.00282861721674689	ZNF638,PNN,RBBP6,SNRNP70,ZC3H18	TTR,EIF3C,PRPF6,AGT,GATAD2A,MRPS15,TXLNA,YBX1,ZNF638,MARK2,RALY,MARCKSL1,BPIFB1,PNN,DNAJC8,FUT11,SARNP,STIP1,RBBP6,SFPQ,SNRNP70,SRP68,ZRANB2,HMGB2,SRFBP1,SMAD5,ABHD14B,SETD2,C19orf47,SAFB,SRSF3,CWC22,SAP130,SERBP1,SH3BGRL2,PCNP,ATXN2L,NUP93,SETX,PPM1G,SURF6,ZC3H18,CRIP2,NFX1,C11orf96,RBM14,CHD4,CASC3,RPRD2,STRADA,MAN1A1,MID1,BECN1,TALDO1,ITGA7,EIF3A,PRELP,CAP2,PXN,STK38L,GLIPR2,CRMP1,UTP18,MPHOSP…
4.37726031416299e-05	NONO,CSNK1A1,CSTF2,RNPS1,PRPF40A,KHSRP,CUL4B,HNRNPA1	CSAD,RANBP2,SLC4A1AP,CHERP,NUP93,CPSF4,RPS2,RPL12,GPLD1,SERPINA1,U2SURP,DPY30,SRSF1,SUPT5H,NONO,SNRPD3,SON,UBAP2,CFI,CSNK1A1,CSTF2,KDM2A,EIF3C,EEF1D,RBM10,LRG1,SERPING1,SERPINA7,SOD3,FABP3,CCAR1,CD99L2,GTF3C2,HPX,RPS5,ELOC,EIF3D,RNPS1,SSRP1,LEO1,NAA15,PPP1R10,CCT4,PLCD1,ELAVL1,SERPINF2,RPS25,PRPF40A,INTS5,PGLYRP2,U2AF1,YTHDC1,ZMYND8,POLR2F,NAA10,KHSRP,ORM1,IK,SAMD1,PROC,TNFAIP8L3,ME3,SORBS1,PPBP,…
0.00910001529910759	INPPL1,PTPN11,ARHGAP17,LMNA,PDGFRB,AP2M1,DOCK1	SIPA1L3,RUFY2,LRRFIP2,RPS13,PLEKHF1,CHCHD1,NAGA,SHANK2,INPPL1,NHP2,SETD3,SEC11C,PTPN11,AP1B1,IMPA2,RNF220,ARHGAP17,TRIAP1,LTBP4,ZDHHC13,PRKCI,H2AFV,ARID1A,LMNA,OTULIN,ZNF668,VPS28,NUP98,SMYD2,KIAA0930,STK25,AOX1,FAM129B,CANT1,HAAO,REEP4,VPS35,UFSP2,COL4A1,EPB41L5,VSIG4,PRG2,TMX2,SERPINE2,ATP2C1,CTR9,BORCS6,ITSN2,PTPRC,MRPL53,NUP160,DNM1L,TUBB4A,FAM84B,FAH,FPGS,GBP5,ZNF148,PHYKPL,ADK,CTTN,TNFAIP3,…
0.00910001529910759	INPPL1,PTPN11,ARHGAP17,LMNA,PDGFRB,AP2M1,DOCK1	SIPA1L3,RUFY2,LRRFIP2,RPS13,PLEKHF1,CHCHD1,NAGA,SHANK2,INPPL1,NHP2,SETD3,SEC11C,PTPN11,AP1B1,IMPA2,RNF220,ARHGAP17,TRIAP1,LTBP4,ZDHHC13,PRKCI,H2AFV,ARID1A,LMNA,OTULIN,ZNF668,VPS28,NUP98,SMYD2,KIAA0930,STK25,AOX1,FAM129B,CANT1,HAAO,REEP4,VPS35,UFSP2,COL4A1,EPB41L5,VSIG4,PRG2,TMX2,SERPINE2,ATP2C1,CTR9,BORCS6,ITSN2,PTPRC,MRPL53,NUP160,DNM1L,TUBB4A,FAM84B,FAH,FPGS,GBP5,ZNF148,PHYKPL,ADK,CTTN,TNFAIP3,…
0.00974270818532069	ODF2,PHC2,TRAP1,CDH1,ARHGAP32	CARTPT,ATP6AP2,LOXL1,LMNB2,TAF7,SNRPN,RNASET2,GRAP2,DPY30,MTPN,ZRANB2,LRCH3,ODF2,SRPX,TRIP10,BDH2,CSRP2,COMMD2,COL11A1,BLOC1S1,PTPN12,LRWD1,COMP,BLOC1S6,TROVE2,RAC1,EHD4,APOA4,LAMA2,TTPAL,MSRA,RARRES2,MMP2,CHGB,NDUFA9,AIFM1,CDK5RAP1,ITGB1,H6PD,CRTAP,PHC2,MSH2,HSPA4L,MFAP2,TPRKB,MRPL24,SEC23A,NDUFS8,GPI,C2orf69,DAB2,TRAP1,IFT172,SFRP4,DCTD,BANF1,SRI,HDAC1,THBS4,SKAP1,SSBP1,HLA-DRA,DDX28,ANXA7,DR1,…
0.00541509731314145	CRYBG3,SCO1	MARK3,HGS,ZFP91,ISY1,PNN,MRPS18A,PCNP,CLTB,NDUFA7,PTBP1,RBM6,MAEA,ATXN2L,UBL5,CDKN2AIP,SUMO3,MARCKS,NDUFS6,WTAP,SMAD5,BPIFB1,TMEM189-UBE2V1,TIMM9,SMC1A,GATAD2B,ZC3H13,ZNF24,RPS11,COX17,RPL32,HSD17B10,SETD2,EIF4B,WNK1,RPS29,SARNP,TDRD3,SAR1A,RBBP6,SPATS2L,MED15,CRYBG3,RAE1,ACTL6A,SELENBP1,GAMT,MMP7,PPP1R10,NUDT16,RBCK1,TPRKB,RPL35A,C15orf40,AP5B1,WDR54,BRCC3,BRWD1,PHF5A,SNUPN,CRISPLD2,GSTM4,SEPT9,…
0.00201808204555335	CSTF2,CDC73,MAX,KIAA1143,CUL4B	PRPF6,CSTF2,SART1,THRAP3,CHD4,ILKAP,ZNF598,CDC73,PNN,TRAFD1,SNW1,KDM2A,PLRG1,DDX23,BPTF,BRPF1,ALDH1L1,YLPM1,BPI,PPP1CA,TMOD1,CISD3,IRF2,MYL12A,ELANE,ZNF652,RTF1,PCNP,SETD2,YY1,RARRES1,RBM25,ILK,ZC3HAV1,ASS1,CNOT3,CKB,INTS12,GATAD2A,PPM1G,PSMD9,MAX,LYRM1,S100A10,ISY1,ADNP,RUVBL1,RBM33,ARID1A,KIAA1143,JPT2,PPCDC,XAB2,CHGB,SMARCA4,TMEM11,CUL4B,SF3B1,LARP7,AGT,GLYATL2,SLTM,ADAR,EXOSC4,RBMX,MRPS28,LSM…
0.0041361816239788	CTNNB1,ATXN2L,CREB1,ACTB,KIF5B,STIP1,PRDX5,EIF2S1,JUP,MARCKSL1,EWSR1,CDH1,MAP3K2,TAX1BP3,HUWE1	RBM14,USF2,ELOC,GATAD2B,PHF5A,HSPB11,CTNNB1,ATXN2L,PNN,CREB1,PPCDC,ACTB,LALBA,ACTA1,TRA2B,RSRC2,HPGD,PRRC2C,AIMP2,ZFAND6,ELL,RPS18,KIF5B,EXOSC6,STIP1,SUMO3,MARK2,GATAD2A,VAT1,OSBPL9,TNS2,SRSF9,NUP54,GOSR2,UBAP2,CARTPT,CUL4B,NUDT4,PRDX5,ANKRD50,SRSF3,PHPT1,EIF2S1,ARHGAP24,JUP,SSBP1,SLC27A4,TRIM4,ZFYVE21,MARCKSL1,EWSR1,NT5C,WRN,PRKAG1,CDH1,MRPL37,SOS1,SH3GL1,SEMA3C,SRP14,SRSF7,THOC5,KIF2A,ZC3H18,MR…
0.00413186527199045	CTNNB1,CTNND1,CTTN,WDR48	MARK2,VAMP8,PNN,LSM3,COA7,PTGR1,STIP1,ALDH1L1,CTNNB1,MGLL,KXD1,EIF3C,CRIPT,CBLL1,PDE6D,MRPS5,ELANE,POT1,SYNE1,LYZ,TIMM29,ABT1,ARHGAP24,MYCBP,NKIRAS2,COMMD7,CMC1,ELOC,NCKAP1,CEP41,KIF5B,HDAC3,PRKACB,PRTN3,ZC3HAV1,CSAD,MED12,MRM1,BHLHE40,NCOA1,PRMT9,GNB1L,DEFA3,INTS12,SLC9A1,MRPL46,VWA8,ASPM,RPAP2,CLEC3A,DOK3,COTL1,SLC35E1,RPS14,PJA2,IFITM3,PIP4K2B,PGK1,MRPS24,DHX29,LARP4,TBCEL,RELB,STX18,METTL18,B…
0.00413186527199045	CTNNB1,CTNND1,CTTN,WDR48	MARK2,VAMP8,PNN,LSM3,COA7,PTGR1,STIP1,ALDH1L1,CTNNB1,MGLL,KXD1,EIF3C,CRIPT,CBLL1,PDE6D,MRPS5,ELANE,POT1,SYNE1,LYZ,TIMM29,ABT1,ARHGAP24,MYCBP,NKIRAS2,COMMD7,CMC1,ELOC,NCKAP1,CEP41,KIF5B,HDAC3,PRKACB,PRTN3,ZC3HAV1,CSAD,MED12,MRM1,BHLHE40,NCOA1,PRMT9,GNB1L,DEFA3,INTS12,SLC9A1,MRPL46,VWA8,ASPM,RPAP2,CLEC3A,DOK3,COTL1,SLC35E1,RPS14,PJA2,IFITM3,PIP4K2B,PGK1,MRPS24,DHX29,LARP4,TBCEL,RELB,STX18,METTL18,B…
0.0015672659066006	DDA1,SRSF3,EEF1A1,HSD17B10,RBMX,RPS26,ACTBL2,SNRNP70,CUL4B,HNRNPA1,RPL35A,MTDH,DHX30	ZFP91,MAZ,DDA1,STAM,SRSF3,TMEM263,ZC3H18,CHMP4A,SLTM,SETD2,NDUFA7,TCOF1,ALDH1L1,CHMP1B,GDPGP1,UBAP1,EEF1A1,YLPM1,MRPS18A,GPATCH8,SUMO3,EIF3A,GPX1,MARK3,AP5M1,FBXO28,SLC16A3,HMGB2,HSD17B10,MED22,ZNF787,HTATSF1,ZNF687,NUTF2,SMAD5,MEPCE,BOD1L1,NUP43,UBQLN1,RBMX,RPA3,SETX,GID8,PPCDC,MTMR14,SCAF8,CWC22,RPS26,RBBP6,FAM76B,PHC3,ACTBL2,HPCAL1,CAPZA2,C9orf78,ZC3H13,TOMM40,THEM4,SNRNP70,AK3,TRIR,ANKFY1,KIF…
0.0015672659066006	SRSF3,YBX1,ACTB,RBM14,ACTBL2,CUL4B,HNRNPA1,SNRNP70,NUP160,HSD17B10,HNRNPD,TRA2B,GLMN	ZC3H18,RBM6,ZFP91,SRSF3,YBX1,SLU7,PNN,SLTM,MAZ,YLPM1,ATXN2L,SMC1A,GID8,SETD2,SERBP1,MARCKS,MRPS18A,ACTB,NUTF2,ZNF787,PPP1R12C,EIF3A,SMAD5,ZNF574,PGAM1,SCAF8,SRFBP1,RBM14,SRRT,CREBBP,RXRB,HDDC3,THRAP3,TMEM263,MED22,GNB2,ACTBL2,UBAP1,HPCAL1,NIPBL,C19orf53,CUL4B,DPCD,GPT,NCAPG,SCAF1,PRRC2C,KERA,HTATSF1,HNRNPA1,RPL28,BPTF,PLAT,EIF4G1,SNRNP70,NUP160,KPTN,MTFR1,MBD1,SMIM12,JMJD6,HSD17B10,EIF3C,COL5A3,M…
0.00409963059488909	CYB5R1,MPV17	DENND2D,CHCHD4,SKP1,NT5DC2,MKRN1,ANKZF1,PEX5,MVD,RAVER2,MCCC2,DES,CCDC12,COG5,TJAP1,NOSIP,EIF3G,CREG1,WDR6,MFGE8,RABGAP1,SRRT,ARFGEF2,DNMT3A,LZTFL1,UHRF1BP1,FCGBP,LRBA,SGK3,MPP7,CHURC1-FNTB,PPP2R5A,DAP,VSNL1,CILP,EML2,RTKN,PRKACA,SORL1,ACBD5,EDF1,FOXP4,MTM1,P3H1,CYB5R1,BEND3,PZP,GOLPH3L,C3orf38,TTC13,ACADM,PARD3,APOC3,ARCN1,DTX3L,ASL,GTPBP4,SRSF4,ZFAND3,TSPYL5,RSF1,H2AFY,KRT6B,LETM1,C11orf58,OGFO…
0.00541509731314145	FCHSD2,DAPP1	RPS11,RBM14,ZFP36L1,CCDC50,ASNA1,INTS12,HGS,FGL2,CARTPT,FCER1G,RPS29,CHGB,MESD,EIF5A,PRKAB1,SUMO3,CCDC93,PGAM1,DBNL,DDT,PKN2,SEPT9,TIMMDC1,NECAP1,GIMAP4,SCAF11,RPA2,SNW1,CDKN2AIP,TPM3,PPP1R11,CREB1,CD59,ARL6IP1,HNRNPL,CXorf38,KIF2A,RHOA,EVI5,NECTIN1,UQCR11,UBE2L3,MED9,EIF4EBP1,CD248,TOR1AIP2,STK10,INTS6,YIPF5,NUBP1,SZRD1,MSN,COX6C,MARK3,MRPL55,B4GALT1,SCGN,RNF113A,SETD2,ARHGAP45,ARHGAP30,ISG20,RG…
1.00336837239804e-06	MCM3,MCM6,MCM7,MCM2,MCMBP	PRELP,WDHD1,HPX,HMCES,AGT,SERPINA3,DYNLT3,TPX2,KIF2C,APOH,BTD,MCM3,C2,MFAP4,MCM6,NCAPD2,PLCD1,EZH2,GTF2E1,HDGFL3,PRIM2,PBK,PGLYRP2,DDX56,TTC27,CLU,UBE2T,CDC37,TPRN,NOSTRIN,GC,BOP1,AHSG,MSH6,HYI,GPX3,DDX5,AZGP1,ILKAP,TOP2A,SLIT3,SPAST,ORM1,CTPS1,MCM7,FGF2,EPS8L2,UTRN,ANKRD17,LPP,CORO1C,ATP8B1,NT5C,NCAPG,GINS4,FAM207A,NAA15,FAM198B,PPIH,MCM2,MCM5,CD5L,CXorf56,MSH2,PDCL3,DAG1,CIT,RBM8A,ANAPC2,SRP68,…
0.00721244950505016	DBN1,SSFA2,LRCH3,COBL,DAB2,ARPC3,ARPC1A,MCM5	DBN1,SSFA2,LRCH3,CASP3,TXNDC9,BLOC1S1,COBL,SH3GL1,CTU2,BPIFB1,LIMK1,PPID,TAF7,CALML3,PLAU,COLGALT1,TNS3,LAMC2,DAB2,PYCR1,ATP7A,ARPC3,CRTAP,CHAD,NDUFB5,P4HA1,GFPT2,SAMSN1,AIF1,CHDH,HS1BP3,CTHRC1,TIMM9,LPXN,COL12A1,FAM50A,GPSM3,TACC1,RPL7,LCP2,FHL3,CHGB,MXRA5,BCAS1,PBDC1,DTNBP1,CSK,RIPOR1,ZFHX3,CD9,MALT1,FAM3C,NDC1,FAM20B,CAMK2D,SNRPN,MRPL32,SLC25A36,NDUFB11,PGAM2,HCFC1,DIS3L2,BLOC1S2,INTS1,AP3S1,Z…
0.00304644018237296	PSMA1,MARCKSL1,LARP7,NIN,UBE2M,NXF1	IK,RANBP2,URGCP,PUM1,CLEC3A,EIF3C,BPIFB1,SIKE1,NUP93,AAMDC,SLIT3,C1orf35,UBE2V2,H3F3A,SFPQ,CSDE1,KDM2A,MAIP1,CYB5R2,PSMA1,UTP6,CAMSAP3,DDX3X,WFDC2,MARCKSL1,FBXO6,CHAD,ENO3,CSNK2A1,DLST,AZGP1,RINT1,BAG6,C8G,A2M,RPS19,BCAS2,SRSF1,MRPS2,CPSF4,IRGQ,UBAC1,PLAT,NUP107,SGTA,LARP7,ELOC,DOCK4,CCDC124,SNRNP70,CSNK1A1,PLCB1,MSH2,CST3,NBN,KMT2A,RPS2,WASF2,SF3B2,EIF4G2,GSTM1,RANGAP1,TNFAIP6,AP2A1,SBSPON,ZFR,N…
0.00586861830846116	SFPQ,SRSF3,RBM14,SNRNP70,RBM5,HNRNPA3,WWP2	PNN,SFPQ,GATAD2B,THRAP3,FAM192A,TARBP2,ISY1,SLTM,SMC1A,SRSF6,NOLC1,RPE,IK,NCBP3,CBLL1,SARNP,SRSF3,MRPS15,PRRC2A,RBM33,DPM3,CCDC9,ACTB,PRRC2C,MAZ,RPS11,RBM14,GPX1,COX17,ACTBL2,PRRC2B,UBAP1,SP1,SRFBP1,ZNF638,EIF3A,DNAJC8,HDDC3,MYL12A,ZC3H7A,CHMP1A,SMIM12,QSOX1,SNRNP70,TSC22D2,LRRC20,RPL30,ELL,STAT1,VPS26A,TATDN3,PPIL1,TRMT61B,SUMO1,NME7,TRIM4,RBM5,FAM136A,DIS3L2,FAM45A,NUDCD1,PBXIP1,RBM6,HADHB,NDUF…
7.95874104013246e-05	SRSF7,RSL1D1,TOP1,CUL3,NCL,RRP7A,WDR46,RPL30,RRP1B	PNN,GATAD2B,RPS26,ZFP91,ARID1A,SRRT,RPS29,YBX1,PPM1G,HADHB,CLTB,PCNP,MAEA,HDDC3,YLPM1,SRSF7,GATAD2A,PRRC2C,SRFBP1,SERBP1,PSMD9,RSL1D1,DDX24,TOP1,CUL3,SUMO1,WDR36,HEBP1,NCL,RPL35A,MRPS5,PTS,GAMT,GSS,USP36,PES1,SELENBP1,PDZD11,LBR,SEC62,ACADS,PGGT1B,RABGAP1L,MAVS,ALDH7A1,ZC3H15,CTH,ALDH6A1,RRP7A,CHCHD3,WDR46,MTDH,MYBBP1A,BLOC1S1,PTMA,VWA5A,EML2,MRTO4,USP47,THEM6,UTP11,RPL30,AUH,UTP4,ZC3H13,ALAD,EIF…
0.00224780387982549	TOP1,RRP7A,RPL5,RPS11,DDX21,GPATCH4,NCL	EIF4G1,TOP1,ECHDC2,GNL2,ACSS3,POLI,MRPS5,RRP7A,WDR35,RPL5,ACAD8,BTD,SCO1,RPP38,GSK3A,TFAM,SDE2,RPS2,PHF5A,NKTR,FAM198B,SPTLC1,RFC1,SELENOS,SHBG,NDUFAF1,MED27,NAA10,PRKDC,SNX21,DDX39B,SH3BGRL2,ZBTB7B,SCO2,DTX2,DDAH2,DIEXF,VAMP8,RIDA,CD3EAP,ARL6IP1,C11orf84,MAPK9,EIF2S3,C12orf45,NSDHL,MRPS16,PRPF6,MTPAP,ZC3H7B,TSC2,THEM6,SEPT10,RPS11,DKC1,PRRC1,ERC1,TAF2,BET1,CARS,ARHGEF37,TPRN,DHX8,DIDO1,BABAM2,TP…
0.000451533054135548	TOP1,RRP1B,RSL1D1,DDX21,RPL30,WDR46,CUL4A,SMNDC1	EIF5B,POP1,RRP1,TOP1,WDR74,GNL2,RRP1B,RCCD1,UBR4,EEF1D,UTP6,RSL1D1,WDR43,ZC3H15,NOP14,MRPS25,NT5C,PPAN,CHMP1A,DKC1,DDX21,MAN2A1,UTP3,SDAD1,RPL30,TMEM214,SNX9,PRRC2C,SPG21,YARS,RBM28,NAT1,MPDZ,WDR46,CDC73,BBS1,EIF4G1,MDP1,CLIC6,H2AFY,DNMBP,MRPS15,CBL,TRMT1,YBX1,GMPR2,XPA,EPS8,CPSF4,TPPP3,F11R,STXBP1,DDAH2,SUFU,CUL4A,PARN,KLHL36,ME3,ISOC1,EML4,RBP7,REPIN1,TNFAIP3,NCSTN,CEBPB,ADPGK,TNS2,YKT6,PDIA4,K…
0.000451533054135548	TOP1,DDX21,NOP2,RRP1B,THRAP3,MYO1C,SON,CUL4A	RNF113A,GNL2,TOP1,EIF3C,POLDIP3,XPA,EIF4G1,ABCF1,TMEM214,CSAD,BZW2,GSTM3,RRP12,SCO1,HCCS,ECHDC2,DDAH2,NAT1,LIN37,DDX21,RBM6,UTP18,WDR19,ELOA,RNF14,NFKBIE,YBX1,BBS1,MARCKSL1,RANBP2,NOP2,MTDH,MRPS5,EIF5B,CORO1C,FUCA1,CBLL1,GSN,SCRN2,SEPT2,C19orf53,MTPAP,SF3B2,MKI67,AIMP2,RBM28,RRP1B,PRPF6,ESD,SNX33,POP1,SELENOS,STC2,THRAP3,SMIM12,BCLAF1,NOLC1,SETD7,GPD2,RPS6KA4,PARD3,MYO1C,RDH10,SERPINA7,SON,VPS25,…
0.00224780387982549	DDX21,RRP1B,TOP1,RSL1D1,RPL5,CTNNBL1,CHD4	DDX21,RRP1B,EIF4G1,TOP1,AGT,EIF5B,RSL1D1,HAUS5,RRP1,GNL2,RPS3A,PPM1G,MYBBP1A,RUNDC1,DPYSL2,DNMT1,RPL5,EEF1D,GBP1,LARP4B,WDR43,POP1,SMC4,IDNK,EML2,REXO4,CTNNBL1,RBM10,PRKG1,NOP14,TP53RK,AKAP8,SDF2,CHD4,MBD4,EIF2S3,INTS5,SUPV3L1,UTP6,GOLGA3,SOS1,RPL27A,BMS1,KRT10,SERPINF1,BRK1,COA7,MAIP1,STUB1,MOB3A,MRPS2,PAN3,MTM1,UTP15,WDFY3,RPL18,QARS,COLGALT1,TMOD1,RRBP1,ADGRL2,ARHGEF37,DBN1,WISP2,ALDH1A1,RAB32…
0.00224780387982549	TOP1,DDX21,CHD4,RRP7A,CUL4B,IVNS1ABP,SRRM2	SELENBP1,PPM1G,SCRN2,SH3BGRL2,LARP4B,TOP1,CSAD,NAT10,DDAH2,NQO2,DYNLT3,NAA10,RBKS,EML2,GMFB,PES1,DDX21,MYBBP1A,PTMA,CHD4,PRPF6,TXNDC17,RIF1,ZNF598,ASPN,MRPS5,ESD,TMEM214,HLA-B,RPP38,AGT,MRPL30,RNF113A,AP3M1,HEXA,EEF1D,MTDH,EYA3,RRP7A,COPS5,EIF4G1,TBL2,CUL4B,ECHDC2,SCO1,SRI,YBX1,UTP18,KERA,SART1,RGS3,GSTM5,SRCAP,SUMO1,ARHGAP24,GSTM3,SEPT2,IGFBP4,SARM1,WDR70,CPS1,IVNS1ABP,NOP16,ASCC3,ERCC5,GNL2,OSB…
0.00166420021061887	SON,SFPQ,DVL3,OGT	STIP1,SLC4A1AP,TXLNG,PRPF6,ELOC,PLCB1,RBM14,PGLYRP2,SON,SEC23B,ILKAP,ZC3H12A,RNF40,EHD3,TAX1BP1,CDH5,RBM6,SNRNP70,GATAD2B,HGFAC,NAA30,HTATSF1,FOCAD,ZFYVE26,CHCHD3,ATRX,MAD1L1,SFPQ,PPM1G,AGT,EIF5B,CD93,REPIN1,MFAP4,NUP93,CFHR5,AKR1C3,IK,ALDH1L1,GSTM2,PRPS1,SRSF7,DHRS11,MRPL58,NELFA,TARBP2,POP4,ZNF638,NMNAT3,ZFAND2B,PTGES3,KIF11,C6,CSTF2T,SF3B4,GSTM5,SRP68,NFATC1,SMU1,DVL3,AKAP8,UBR2,POLR1B,PPP1R10…
0.00900004479620829	DKC1,SRP14,SNRNP70,RUVBL2,OBSL1,GNL2	RBM10,SLIT3,CHERP,STIP1,HBG1,TNS2,SNRPD2,CSTF2,SBSPON,SLC4A1AP,SNX8,POLR2H,RANBP2,DKC1,HNRNPM,IK,DDAH2,CAPRIN1,MRTO4,CYCS,U2SURP,DDX20,NUP153,USP7,DNMT1,THOC7,SERPINF2,AOX1,GTF2E1,SF1,SRP14,CLDN7,TDP1,UTP6,FBLN5,ELOC,SMNDC1,ASCC3,SCAMP3,GSN,CCP110,CUL4B,ALDH1A1,CELF1,IGF1,NRP1,DCLK1,PLCD1,PGLYRP2,MFAP4,SERPINA7,SEPT2,MAN1A1,TK2,NAT10,CSAD,CRISPLD2,ANXA2,SNRNP70,PPM1G,RUVBL2,INTS14,RPS7,HCFC1,RBM1…
0.00883361204294807	ZFP91,ANXA1,DLG3	PNN,PPIL1,ZFAND6,CDK6,ZC3H14,NCBP3,SMC1A,THRAP3,KMT2D,TG,RTF1,RBL2,RBM14,CDKN2AIP,COMMD3-BMI1,ISY1,INTS12,ZNF638,TPRG1L,SP1,NCALD,SDE2,KLHL11,ALYREF,BRD2,TMEM106B,C19orf53,ZNF460,SLTM,GLRX2,RPS11,BLOC1S5,NPM1,PRTN3,HDGFL2,SLU7,ZFP91,NDUFV3,ARID1A,PPP1R11,CASP10,PRPF6,YLPM1,CENPB,ZC3H4,RSRC2,CHAMP1,KDM6A,GPX3,BOD1L1,ZFR,RPL31,ARL15,BPI,TOR1A,INO80E,SETX,ITGAM,HIRA,TRIOBP,ANXA1,SELENOP,UBL5,SPATA20…
0.00317701773122857	MARK2,TPM1,DLG5	PNN,SUMO3,GATAD2B,RPS11,LSM6,SARNP,PCNP,RPL35A,MARK2,CLTB,FCER1G,PHF5A,NDUFA7,ZFP91,SDE2,PRRC2C,SMC1A,ERC1,CMC4,UBL5,PPP2R5B,HNRNPDL,UBQLN1,RPS26,NUBP1,PPP1R12C,MAEA,HDAC7,SRSF7,PTBP1,FNBP4,ARID1A,IK,ATP5B,YBX3,BPIFB1,PARP12,RABGAP1L,LTBP3,PPP3CA,MAP4,EXOSC6,RUFY1,OPLAH,YME1L1,MTX3,SUMO1,NAA10,ACP1,ING1,MFAP2,TPM1,TAF7,COMMD9,TRMT112,RPL17,LARP4,SAP30,UBXN1,ARL1,TMEM189-UBE2V1,PHIP,DPH5,URGCP,ERB…
0.00247112101454632	RTF1,DNMT1,F8A1,DNMT3A	CLU,UTP3,RTF1,ANKS1A,ELOA,PIP,ASCC3,NOP14,AGFG1,ATRX,SON,ELL,EIF3C,USP8,ROCK1,RNF40,ECI1,ZC3HAV1,ARHGAP30,MRPS15,SNW1,PRPF40B,GAA,GTPBP6,CCL5,TPP1,RRP8,CYCS,JUP,SEPT9,GRB10,ZNF638,MRPL55,ENOPH1,DNAJA3,RPS26,NUP93,GMPR2,DNMT1,DHPS,REXO4,LGALS3BP,ACTR1B,CDR2L,SZRD1,UBE3B,OSBPL11,SURF6,ALDH7A1,USP36,MMP7,F8A1,PCYOX1,ABCF1,SEPHS2,CYFIP1,TRIM36,NOP16,TG,PDXP,ATP5A1,BZW2,EIF5B,IK,TMEM263,MOB1A,STXBP4,A…
0.000935349152883111	ELMO1,SNW1,RAC1	LSP1,INPP5D,FMNL1,SPAST,FYB1,ELMO1,SUPT5H,GBP1,PLRG1,DOCK10,ARHGAP15,NFKBIE,OSBPL11,MOB1A,FNBP1,SPCS3,IFT80,ITGAL,HCLS1,STK17B,MYO1F,APOH,MARK2,EIF5B,FUT11,ME2,SDF2L1,PSMD8,MTA2,ARHGAP25,DPP8,DOCK8,FAM206A,LRP2,DYNC1LI2,LCP2,CPE,CHTOP,QSOX1,NAA10,ARHGAP30,PDAP1,EHD3,SNW1,PIK3CD,PLCG2,PGAM2,DNTTIP1,WDR70,SSR4,LYSMD2,TNRC6B,TAOK1,SFSWAP,SBSPON,MLF2,NIPBL,CFB,ZNF706,RPL17,TDP1,GMPS,ZFYVE21,IRF2,HTRA…
0.000631660541242349	DOCK8,MOB1A,CDC42,NSMAF	INPP5D,FMNL1,DOCK8,FNBP1,ARHGAP15,LSP1,FYB1,FGL2,RPS9,WASHC4,RPL17,MOB3A,ARHGAP45,SYF2,RPL5,RPL19,IRF5,NUBP1,RPL18A,PLEKHO2,RPL27A,MX2,DIS3L2,ASCC3,LSM6,RPL13A,WASF2,RPL32,OSBPL11,ACTA1,PPP1R18,SMC3,MOB1A,QSOX1,MTA2,MNDA,HCLS1,ILKAP,STK10,PHF5A,NAA15,SCAMP2,DIABLO,TBPL1,PTPN1,NBAS,DAPK2,DOCK9,PKP4,UACA,OAS1,TXNIP,TTN,SEMA4B,CDC42,CTIF,SLFN5,CHD4,OAS2,MTUS1,GIMAP4,TBC1D9B,GLG1,NFATC3,HLA-DRA,ENOSF…
0.00139889622145643	PSPC1,MED16,HBG1,METAP2,ZNF326,AIMP2,FUBP3,LUC7L3,WDR74	MED8,RBM22,PSPC1,NUP93,CPSF6,MTA1,ACSS2,SRSF2,MED16,BABAM2,MB,CSTF3,INTS11,YTHDC1,HBG1,AKT2,HNRNPUL2,TANGO2,CCDC12,DPYSL2,SMNDC1,RANBP2,METAP2,FYTTD1,ZNF326,CCDC58,RPP21,PRKDC,PPIL2,TATDN3,HNRNPH3,TRIM28,NCL,WAPL,AIMP2,SIN3A,SURF1,NEDD4L,NONO,NUP58,GPLD1,SCIN,MAN2A1,NAAA,SF3B6,ZMYM2,MAP1S,PIGK,NMT1,RPUSD2,NDUFA7,CEP135,PRPF39,FUBP3,RIOK2,PACS1,AFAP1,LNPEP,MRPS15,HDLBP,HNRNPD,C9orf78,TNS1,ICA1,LUC…
0.00381406116123386	TRIM14,ARFIP1,UBE2I,CRMP1	PHF6,PPIH,PM20D2,BAIAP2L1,RMDN3,EPS8L1,CREB1,ROCK2,SNX9,AGR2,VBP1,NDUFA5,KHDRBS3,CHMP4C,UROD,TRAPPC4,PAPSS1,AMACR,ATP5J,SH3PXD2A,SAR1A,TOR2A,LYAR,IFT20,NDUFA1,TOR1B,PPP1R11,EIF2S3,TRIM2,GSTZ1,ANAPC10,ECI2,PACS2,NSF,EPS15,ARPC2,RCC1,MPHOSPH6,COPS6,PDXDC1,FAHD1,SERPINB1,SDSL,CIT,TRIM14,ARFIP1,UBE2L3,DNAJC7,LRSAM1,TPRN,GMEB1,CD59,POLR2G,NOMO3,DCTN2,MPG,BTF3,IDS,ABHD14B,MAP3K20,PPT1,TRA2B,PLAT,XRCC1,…
0.00689728285801005	JUP,DSG2	SF3B1,DLST,NAA20,GP2,TDP2,FAM32A,NGDN,HEATR5A,SEPT5,ZW10,ENO2,ATP6V1B1,PLAT,PAPOLA,PIKFYVE,ANGPTL2,TRMT1L,ANK3,TMSB4X,USP11,PI4K2A,TAGLN,SMTN,JUP,DNMT1,SUPT16H,TMEM33,MED20,OGDH,STRN3,NDUFS5,USP39,SH3BGRL2,TNC,ACBD6,SDHB,TNPO3,DSG2,NOM1,PAFAH1B2,INTS1,ERF,STX6,CHD4,INTS10,CFD,USP22,POLR2F,DHCR24,CNRIP1,GRSF1,FCHSD1,CDKN2AIPNL,CHMP5,CREB1,MDH1,AFTPH,CKAP5,SIN3B,AAK1,MYH9,CEP350,LARP1B,PTCD3,SNX29,…
0.00809622933234394	PKP2,JUP,PKP3,WTAP,CNTROB	RBM14,SMC1A,GATAD2B,RPS11,PNN,CNBP,RSRC2,CDKN2AIP,YLPM1,GATAD2A,ZFP91,RUFY1,ACSS3,VPS39,RPS26,TCOF1,PRRC2C,BOD1L1,RBBP6,MAEA,HGS,CBLL1,SERBP1,USF2,SDE2,SUMO1,DDA1,CCDC9,ZC3H14,KIAA1143,SWAP70,PKP2,JUP,SUCLA2,WDR11,DSG2,RPL11,ARHGEF12,NDUFA7,SPARCL1,HNRNPL,MARK2,PKP3,ASCC2,REEP4,RPS27L,WTAP,SAP30L,CNTROB,CHCHD3,SRRM1,ILF2,FYCO1,SNX3,ISOC1,SUMO3,PCYT1A,KEAP1,ARMC9,MESD,CDC42,TNFSF12,DCUN1D1,NOSTRIN…
0.00149880654569393	DSP,CDC73,CNTROB,TARDBP,DES,CSTA	MARCKSL1,LZTR1,BTD,TBC1D13,USP9X,CSTF2T,MGLL,TANGO2,PLRG1,STIP1,IFT80,SNRNP70,WISP2,SART1,NUP153,EIF5B,SPINT2,DSP,TMOD1,TPR,CTCF,TDRD3,RPL32,STRADA,ILKAP,EIF3C,ENTPD5,MARK2,UBP1,CDC73,CNTROB,LRG1,USP36,SF3B1,RBBP6,NIPBL,LDHD,DIEXF,CYTH2,AIDA,COMMD10,ACTR1A,KCMF1,CNDP1,ZNF638,CP,TARDBP,A1BG,GSTM5,BZW2,CWC22,MEPCE,APRT,SH3D19,GSTP1,PGM5,ANXA5,RPAP1,CACNA2D1,CES1,NCOA5,CSF1R,MAP3K7,ING3,NEURL4,PRPF6…
0.000342591910285777	DTX3L,RPA2,HGS,PARP14	GATAD2B,PNN,SARNP,ZFP91,ASNA1,MAEA,SMC1A,PRRC2C,ATXN2L,LBH,SUMO3,PTBP1,COPE,MARK2,NDUFA7,ZFP36L1,RPS26,BOD1L1,MARK3,RTCA,SRSF3,RPL35A,SMAD5,ARID1A,SAR1A,RBBP6,RPS29,DBNL,IDNK,CIR1,SZRD1,CHCHD3,RHOA,DHRS11,DTX3L,MAP7D1,CSN2,BRCC3,XAF1,EEF1A1,NKAP,C19orf66,CSNK2A1,ZC3H14,KRI1,HINT3,SP100,ATXN3,FCER1G,GRHL2,F11,PABPC1,NT5C3A,PCYOX1,RPA2,HGS,USP36,EIF2AK2,CDC42BPB,CWC22,ZNF609,STEAP4,RAE1,RARRES1,PAL…
0.00351326567155774	DYNC1LI1,CDC5L,TRPT1,DYNC1H1	AGT,CSAD,SUPT5H,NONO,ORM1,NAA10,SLIT3,DNAJB1,CPSF4,GFRA1,PFDN2,DYNC1LI1,PLRG1,PSMG2,PRPF6,COL2A1,PGLYRP2,UTP6,PCYT1A,GPX3,NAA15,DMXL1,SFXN5,CHTOP,PODN,TPPP,HCFC1,PLCD1,RPL10A,NMT2,EEF2,LARP4B,CHERP,TANGO2,NIP7,IRS1,RPS5,A1BG,SRP72,CELF1,ZNF598,SAP30,HBA1,TTC1,RNF20,RPS2,USP3,PUF60,ORM2,LIN37,CTSF,ECHDC2,SNRPD2,RANBP2,RPL30,MCM3,RASAL2,POLR2A,CACNA2D1,SON,SETDB1,SDS,ITSN1,GPN1,ADNP,U2SURP,NRBF2,TJ…
0.00432800906601397	SRSF9,AKAP8,RPS2,VHL,CSNK2A1	RBM14,POLR2A,UBE2V2,CPB1,DSCC1,SRP14,TTC9C,RPL18A,RBMS1,IFT80,BOLA3,BABAM2,SRSF9,RPL31,CIT,FOXJ3,DUT,CELF1,EIF2S3,RPS5,AKAP8,DPP8,MRPL43,TIPRL,PCLAF,CHMP3,ADAL,ERP29,NONO,CD209,SYF2,SFXN4,MAP2,THOC7,PRPF6,MAF1,AGFG1,SAMD4B,WTAP,CTNNBL1,FRMD8,AZU1,HNRNPA3,POLR2L,URGCP,LAMP2,KLC1,RPS2,SGTA,EIF2B5,SETX,RNF7,GSTM2,TXNDC9,URB2,SRP9,EIF3G,MRPL27,SNRPD2,PPP1R12B,PODN,FCER1G,CPA3,EIF3D,ZC3HAV1,BORCS6,PKP…
0.00771960425507578	PKN2,RAD21,APC,SOD1,TNIP2,EEF1D	SAR1A,WDR7,NUBP1,EIF3M,RPS3A,DCTN5,LSM6,RPE,MIS12,LAMTOR3,RPLP0,IFT122,TXLNG,RPS23,FBXL18,RPL35A,CARTPT,MMS19,INTS12,REPIN1,ASNA1,SETX,PHF5A,SH3BGRL2,PAN2,SRSF3,PPIE,SF3B4,HADH,DPH5,DPM3,YLPM1,ATXN1L,MRPS18A,PKN2,KLF16,DNAJC19,NFX1,RHOA,HDDC2,RAD21,NISCH,APC,LSM12,BLOC1S3,RPA2,GNB2,BCAP31,SOD1,SEPHS1,GAPDH,NKTR,TNIP2,MINK1,ZC3H4,ADPRHL2,PPHLN1,PRAG1,HSPB11,BPIFB1,ILKAP,WRAP53,DCP1A,PTGES3,EIF3F,M…
0.00715003324216624	RBM14,RPL18A,RPL35,AMPD2,RPS26,RPL19,SRRT,MRPL54,EIF5A,ZMYND11,CKMT1A,POLR1C,PPIE,ATP5B,GLUD1,RANBP9,ZC3H18,RPS18,RPS15A,NDUFS3,ISOC2,YRDC,PDAP1,ANP32E,TRIM47,NDUFA5,EIF2B4,LYAR	LSM6,UBQLN2,RBM14,DCAF10,WTAP,RSRC2,CDKN2AIP,RPL18A,RPL35,SUMO3,C12orf57,FCER1G,GCHFR,CARTPT,AMPD2,RPP30,MRPL45,FUT11,GFM2,SPATA20,RPS26,LIMD1,NDUFS1,OXSM,RPL19,BPIFB1,SRRT,RPS6KA4,DNAL1,DDX19B,MRPL54,EIF5A,ZMYND11,CKMT1A,SOS1,STAM2,NUBP1,POLR1C,GATAD2B,PCNP,PPIE,NDUFV1,ATP5B,COX6B1,LCLAT1,PCBD1,USP32,BLNK,HTRA2,GLUD1,HGS,DPP8,CHMP2B,TMEM109,RANBP9,HEBP1,TFCP2,MRPS15,DENND4B,TBCA,MVB12A,GTF3C6,ND…
0.00771706710322612	EIF2AK2,PDGFRB,STAU2,ELMSAN1,HSP90AA1	EIF2AK2,MX1,MX2,PARP9,IFIT1,GABARAPL2,ARHGEF1,HTATIP2,IRF9,SDF2,NUDCD2,CSAD,HERC5,CDC42EP4,CD3EAP,TERF2,DNMT3A,TACC2,EXOSC1,DRAP1,TJAP1,PRMT9,XAF1,FAH,CORO7,IFIH1,KRT8,PSMB5,PDGFRB,DHODH,PSMB6,WDR20,AKT1,CARNMT1,TRIM47,DTX3L,PYGB,HSPA4L,NMI,LTA4H,EAF1,HEBP2,SAMD9,APOBR,DDX5,ATIC,SLC25A25,SPATA5,AHSA1,SUPV3L1,STAU2,TNC,TOPBP1,PCYT1A,DR1,UTP4,SLC25A22,TBC1D17,SMNDC1,DNPEP,HYI,ACY1,WIPF1,NFKB2,DCAKD…
0.00466703027252691	RPL10,EIF3K,RPS20,SOD1,MYH11,EIF3G	CD59,CHMP1A,RPL10,ZFP36L1,ACOT13,NUP93,CSN2,SETX,CARTPT,RPS11,ACSS3,MAEA,ATP5B,ZC3H15,ARL6IP1,XDH,COL16A1,ZHX2,NUMB,LALBA,TBPL1,ITGB1,EIF3K,CTH,ISY1,MARCKS,TRMT11,RPS20,PPIE,RPS29,STRADA,CCDC50,SQSTM1,ROCK1,NUBP1,UBN1,STX4,UBE2L3,DCTN3,LGALS7,FAM122A,RPL29,CPB1,GPATCH8,UIMC1,ATP13A3,RPS6KA4,RPL18A,GATC,ATP5E,C17orf49,PCBD1,GTF3C4,FAM107B,MFAP5,HABP2,SOD1,WASHC4,SUMO3,MRPL40,CCDC6,TPRG1L,UBQLN2,RF…
0.00141161322422301	EIF3G,EIF3C,USP3,CHD4,DDX3X,ZNF598	SART1,PRPF6,SRP68,CSTF2T,BUD13,MRPS25,ARIH1,SEPT2,NOP16,EIF3G,MRPS26,CHAF1B,EIF3C,CAPRIN1,SF3B2,SERPINA3,TTN,USP3,INTS5,EEF1D,ELL,BTD,PGM5,GPX3,PNPLA6,TXLNA,NFKBIE,PFDN2,TDRD3,MGLL,FOSL2,VAMP8,ASCC3,RPS11,ZNF638,HPGDS,RAB3GAP1,SMG6,XPA,EIF1B,PRG4,MRPS2,DHRS7B,MBNL1,CHD4,TXNDC9,NUDT4,SUGP1,MTERF3,EPM2AIP1,GRPEL1,AGT,BBS1,TBC1D13,C6,BOP1,GPX4,POLR1E,TIMM13,COA7,CELF1,RBP7,PRKRA,MTX1,TXLNG,AFAP1,NAA…
0.00141161322422301	MCM2,EIF3H,MYO1C,AHSA1,EIF3K,HDAC4	MCM6,KIF4A,PLOD3,TXNDC12,MCM5,RFC2,NSA2,BAG6,MCM3,TOLLIP,NASP,STC2,DNMT3A,PRIM2,PM20D2,BBS2,AARS,DHX57,BOP1,SFRP4,DAB2IP,HSPA14,LRG1,DHX36,SERPINF2,MCM2,FAM207A,FAM198B,THOC5,SHMT2,UHRF1,XPO5,IFT74,UBE2S,RANGAP1,APPL1,UBE2C,RPS27L,PRELP,EIF3H,WDHD1,MCM7,C9,BID,C8B,MYO1C,AHSA1,EIF3K,LRPPRC,SORBS3,KERA,UTP6,SERPINA7,ANKRD17,RPL7L1,EZH2,MSH6,CALU,CPEB2,EPRS,PLAUR,SNTB2,PYCR1,C1RL,OSBPL2,WDR5,MRPL54,…
0.000187764105167604	SRSF3,RBMX,RPS15A,RPS19,RPS26,EIF3A,EIF3K,XRCC5,HIST1H4A	RBMXL1,ELOA,PRRC2C,NUDT16,SRSF3,RNF40,FNBP4,CCDC86,MARK2,MRPS18A,USP14,HS1BP3,SLTM,MARCKS,TMEM263,RBM14,ZC3H18,SETD2,XRCC6,NACA,GDI1,SRRT,TSC22D2,HOOK2,RBMX,THRAP3,CARTPT,SUMO3,DNAJC8,SCAF8,HDDC3,CNBP,ZC3H14,BRPF1,PPCDC,INTS12,WTAP,KANSL2,RNF126,ACIN1,EXOSC6,SDE2,BOD1L1,ZNF24,SP3,NDUFA11,RPS15A,MRPS15,LSM6,SLU7,PRDX5,RPS19,TOR1A,RPS26,POLDIP3,MAP7D1,UBP1,CLTB,EIF3A,CDKN2A,YBX1,C19orf53,SEPHS2,TPR…
0.00419933624273952	SRSF3,RPS11,RPS18,RPS26,RPL29,RBMX,GPC1	SUMO3,SMAD5,MRPS18A,SRSF3,MAEA,RBM6,CLTB,MARCKS,RPS11,HGS,MARK2,RPS29,GATAD2B,INTS12,RPS18,NDUFA7,ZFP91,PHF5A,ZC3H13,SARNP,TBCA,RPL32,ISY1,RPS26,FAM76B,RPL28,PCNP,RPL29,GATAD2A,TCOF1,PPIE,PPIL1,C19orf47,COX17,SUMO2,IDNK,PTGES3,NSMCE4A,MED21,BAX,CPEB4,DGUOK,TPP1,BRAF,DMXL1,NAA30,RBMX,TFAM,ARMT1,LSM6,HPGD,ARPC3,TTC33,PSMB3,GPSM1,ARVCF,FTSJ1,TBC1D10C,ELMSAN1,SPI1,CCDC93,COX6C,ASF1A,PIK3C2A,DGKZ,GPC1…
0.00419933624273952	PAN2,SNRPD3,NARS,CCT6A,EIF3K,DOHH,SF1	HGS,RPLP0,KPNA4,AZI2,TOR1A,UBE3C,MKNK1,HAUS3,CSTF1,TXNDC17,CUTC,SCRN3,PPP1R12C,ELOA,ASRGL1,BLNK,SCAF8,ABRACL,GGACT,CEP135,CCDC134,INTS9,SAR1A,CHMP2A,KANSL2,KANK3,WDR4,TRAPPC6A,PSMC3,DSCR3,RHEB,PCNP,AIP,CISD3,YBX3,DNAJB12,DHX9,OSGEPL1,CDKN2C,GRB7,MTDH,DNLZ,CPSF2,COPE,UBN1,NAA35,MEMO1,PAN2,ACAN,BRWD1,RPLP1,CCDC88A,PPFIBP2,ERC1,RTN3,BTAF1,FAS,SNRPD3,ACOX1,APRT,FAF1,CCT7,PDF,PTBP1,NARS,TNC,IGBP1,BUD1…
0.00322903126518004	ACIN1,ZRANB2,GPATCH8,CSNK2A1	HDGFL2,CCDC9,RBM6,ACIN1,EIF4B,TPRKB,MFAP1,SAFB,DDA1,TCOF1,PCNP,YLPM1,BOD1L1,ZC2HC1A,CHMP1B,SRFBP1,CCDC86,PPIL1,CNBP,TRIR,RPL28,SZRD1,PNISR,ZC3H13,SP3,ZC3H18,TRAPPC4,TOR1A,SETD2,RBBP6,ZRANB2,SLTM,GPATCH8,KIAA1143,EDF1,RPS10,PPHLN1,HGS,LLGL1,SUMO3,HAGH,FCER1G,RBM5,MINK1,RABGAP1L,EEF1AKMT2,SRSF4,HNRNPDL,C1QC,OPTN,DBNL,GRWD1,SNAP23,IDS,CCT8,CD59,RABAC1,POGLUT1,SPTLC2,GREM1,CHMP5,MMP7,NF2,CNKSR1,RNPEP…
0.00854121907456476	HSPA8,SLC4A1	DPP8,SDCCAG8,SLC16A3,ITIH3,HSPA8,PHGDH,NDUFA11,SRP54,TMEM63A,CLMN,SMARCC2,TFF3,SLC4A1,TPRG1L,POLR1A,CCT4,ATG3,NLRP2,UBXN1,BID,TOM1,AHDC1,GMPPB,ALDH1A3,PRIM1,YBX3,ARSB,MAPRE3,NOP56,AHCY,LAMP2,TSSC4,PRPF6,COX4I1,USP33,CUEDC1,RALGPS2,ROGDI,LPIN1,DSCR3,PANK4,TPM4,RAD21,GIMAP4,MROH1,RNF146,TNC,YLPM1,AGRN,TBRG4,CLTB,UBE2I,CCDC88A,GPATCH11,LAMTOR4,INTS11,WDFY3,TRAPPC3,BUD23,OTULIN,GTF3C6,ZNF687,RPN1,FAM…
0.00317262908138345	ERBB2,GRB7,POLR1B,CDK6,PTPN11,SDC1,CDK12	ERBB2,MIEN1,GRB7,RETREG3,ENO3,NQO2,BZW2,HEXIM1,XAB2,SRSF9,POLR2H,TSN,PRPF8,MRPL51,STRN4,POLR1B,NSUN4,PPP1CC,WDR3,ALDOC,INTS4,CDK6,C1orf198,AFM,MBOAT7,CPSF6,SET,FOXK1,ITIH4,SNTB1,H1FX,C8B,SLIT3,PAF1,RRP12,LIMS1,HACD3,CD36,CCNK,KIAA1324,EWSR1,AFTPH,LTV1,PLAT,GATAD2B,MED8,SNRPB2,SF3A1,CFHR2,TMEM11,PTPN11,UQCR10,ALDH1L1,KXD1,SDC1,ZNF830,PPP4R3A,CD248,KRI1,DMD,SRFBP1,VASN,SMC3,BYSL,ATN1,MBP,LALBA,S100…
0.00727692874448481	ETV6,ACTA1,PIN1	RRP12,TPPP,SF3B1,CHD4,PES1,CNPY4,EHD3,UBN1,NDUFA1,STXBP4,MAN1A1,PLTP,AKAP13,UBXN6,MRPS24,PRPF6,RPL17,SUGT1,PDHX,RPL5,SETD7,ETV6,PLRG1,MGA,NCOR2,SUMF2,UTP3,PTPN9,INTS5,CLEC3B,CLU,TULP3,KBTBD2,YIPF3,TMEM214,PGLYRP2,SUPT5H,UTP11,RPS9,NOP14,AGT,RNASE1,USP8,GATAD2A,POP1,THUMPD2,RAB27A,YARS,MBOAT7,TAF10,EP400,ELL,REEP4,PDS5A,SDAD1,PPP2R5B,DGKZ,DENND4B,EDC3,CHD2,ASAP2,NOC3L,TXLNG,ESYT2,TAF8,PRPF8,IFT80,…
0.00216451233674398	ZFP36L1,PPIE,EXOSC6,RPS18,DHX37	TBCA,CLTB,RPS26,CDKN2AIP,CHMP2B,UBL5,MARK2,TMEM106B,EIF3A,BRD1,GATAD2B,SMAD5,SMC1A,NUBP1,RPS19,RPS11,BASP1,ZC3H13,ZNF787,ZFP36L1,NDUFA11,RPL32,RSRC2,PNISR,PPIE,SARNP,MFAP1,FAM76B,SP3,YLPM1,NFX1,ARCN1,HGS,EXOSC6,FTSJ1,RPS18,DDA1,WDR33,RPL35A,ZNF24,CHMP1B,SETX,GID8,NFATC2IP,CHMP1A,ZNF143,MARK3,COPE,PCNP,HPCAL1,NDUFA7,CLIC6,BPIFB1,SUMO1,YBX1,ZC3H14,PRPF3,ELL,VPS39,SEPT7,NDUFA13,TAGLN2,LSM3,PLRG1,RRP…
0.0069688090964386	ATP2A2,SNRNP70,RALY,FXR1,NOM1,WDR43,MAGED1,WWP2,SSR1,LARP4B,EPRS,YBX1,MYBBP1A,SRSF3,TCEA1,IWS1	FBXO28,ATP2A2,RAD9A,DCAF13,DIEXF,TNS2,SNRNP70,RPS19,DOHH,ABHD10,NRBP2,PIGT,EDF1,RPS3A,BANF1,RALY,TMOD3,COPS4,GNPDA2,VAT1,TOMM5,RCHY1,CHCHD1,RNASEH2C,TIMM22,FXR1,NOM1,WDR43,PTGIS,POP4,MAGED1,C12orf10,WWP2,EIF4G1,CNOT10,DDX52,NQO2,SNUPN,SSR1,MIB2,SLC38A10,UNG,PRPF40A,GCN1,GPX3,ARHGAP1,PGLYRP2,TOLLIP,ACOT8,LARP4B,AGO1,SERPINC1,ESD,EPRS,ATXN2L,HSPA12B,YBX1,FAM111A,MYBBP1A,PRMT7,VAMP2,DHX57,SRSF3,SMND…
0.00296090371111185	EZH2,PCBP1,HNRNPH2,HNRNPL	RPP30,INTS12,SAR1A,USF2,RBCK1,LAMTOR3,CSN2,EIF3F,RTCA,GRHPR,EZH2,PPP2R5B,PRKAB1,PRPF6,PPIE,DFFA,RBM14,SEPHS1,RASA1,BCAS2,ATXN2L,EIF4B,ZC2HC1A,QTRT2,TAF9,CHMP5,MAEA,EIF3M,HDHD3,GATAD2A,ACTR1B,MARCKS,R3HCC1,ATRN,SUMF1,PSMA2,SARS,ADO,HIF1AN,WNK1,HEXA,PHLDB3,RPS11,TRMT13,SMARCB1,SDE2,EGLN1,EIF4A2,RPL23A,RABGAP1L,ANAPC4,ERO1A,LRRC41,RSRC2,SF3A2,PCBP1,FCER1G,RPLP0,CSAD,SCFD2,SRFBP1,CUTA,TOR1AIP2,HNRNPH…
0.00364058289939207	HGS,NFX1,SMARCB1	MAZ,ZFP91,GID8,SMC1A,MAEA,HGS,SUMO3,COMMD10,PHF5A,SAR1A,CUTC,RPS11,COX17,LSM6,SMAD5,RABGAP1L,SRSF3,PPP1R12C,ARID1A,ATP6V1B2,UBQLN2,PNN,MARK3,ARL1,SP1,PPIE,MEPCE,EXOSC7,PHF3,NFX1,EIF3A,COPE,DDX1,PCNP,YLPM1,ACTBL2,WASHC3,NDUFA7,RPL35A,RACK1,TBCA,BUD13,NFYA,SMARCB1,TMEM263,PRKAB1,TFDP1,RALY,CHMP2B,UCHL5,USP11,PTBP1,C5orf24,ZC3H4,KBTBD2,RPS29,HDDC2,GPX1,RPS19,FAM76B,WTAP,COMMD3,TPRKB,CCS,SNX15,CPSF2,…
0.00201107708338318	TRIM25,CLTB,OFD1	MRPL19,UFSP2,TRIM25,DHCR7,FUCA1,DPP8,HSPA8,ARID1A,REEP4,CHD2,RDH14,MPI,RAD21,RHOC,SELENBP1,SLC44A2,SLC16A3,CLTB,LGALS7,ALDH1A3,MGMT,OFD1,AUH,DCTN4,BAG5,COMMD10,COPRS,MYL6,CNOT11,PDHB,RPL10A,RPL4,XPA,TMEM63A,TSN,OAS3,CLIP2,MTDH,SCLY,AMBP,NDUFA11,FGG,SLC12A9,INTS14,SEC14L2,NID1,BCAT2,S100A13,LSP1,FCHSD2,SHANK2,SCGN,TOP1,CHKA,SHKBP1,TXN2,ATG12,HSCB,NDUFB9,TACC1,TOPBP1,GTF3C6,MAPRE3,NKAP,MIB1,YBEY,TM…
0.00120485600400094	FBN1,MFAP2	FBN1,ZC3HAV1,RTCA,MSRB3,CD59,SARNP,ATP5B,ARF4,PSMB3,CARTPT,RPL35A,HIRA,MAP4,RPS11,ZFP36L1,NOTCH3,PHF5A,EEF1A1,EMSY,FMNL3,ACTA1,LANCL2,ETF1,DPH5,RPL11,RPL18A,PPCDC,PSMA5,SUMO1,PPP1R12A,RPS29,RPS20,TOR1AIP2,WNK1,PNN,VEZF1,TRIOBP,MICU1,RPS15A,SQSTM1,NFKBIE,AMPD2,LOXL1,BRAF,ERC1,ARPC1A,MKLN1,SIGLEC1,GFER,PLEC,SMOC2,TGS1,LIG1,CDR2,GOLIM4,KPNA2,AHCYL1,LRP2,ACOT13,IKBIP,GPC1,RIN2,COMP,CCDC58,MRC2,TAX1BP…
0.000204634326726194	FGD5,JMJD6	PTBP1,RPS11,SARNP,FGD5,MARK2,RPS26,CLTB,SRRT,PPP1R11,MED21,ELOA,NDUFA7,NCOA7,SUMO3,RPL18A,PSMA5,SLC39A7,PSMB4,ASNA1,NOP14,RBBP6,PGAM1,PRRC2C,TPRKB,TAPBPL,SCAMP2,DOCK4,SPPL2A,HERC5,FBN1,DDHD2,PICALM,JMJD6,ELAC2,PPM1A,EIF1B,FYTTD1,TXLNA,SEC16A,BRCC3,TSPAN15,GDI1,RBM14,ARPIN,TMF1,INO80C,JAK1,ELMO1,TXNRD2,IFIT2,HAPLN3,RIN3,CFHR2,ACTN4,ANKS1A,STX7,SH3BP4,EMG1,PARP12,PDE12,TIMM29,TNPO1,PDZRN3,PFKFB2,PP…
0.00589632292456315	RPA2,COMMD10,FKBP15	HGS,PNN,SARNP,HNRNPDL,MARK2,ATXN2L,GATAD2B,INTS12,RPL32,RPS11,NOL8,NDUFA7,SUMO3,MARCKS,ELL,PCNP,SRSF3,TXLNA,ELOA,BCLAF1,EIF3A,RPS29,PKM,PRRC2C,PRDX5,COL16A1,FCER1G,VAMP8,RPA2,SAR1A,UBN1,PTBP1,EMSY,SLAIN2,CUTA,ROCK1,ISY1,ZFAND3,ZC3H14,RPS26,ZNF787,RPS18,COMMD10,ATP5B,IKBIP,PCIF1,CTCF,ZNF668,FKBP15,CLYBL,UBL5,MLST8,PDXP,COX17,GFRA1,PAG1,GNG5,H1FX,RAB2A,ECD,UQCRQ,POLR2J,NOP14,CHCHD3,PKIG,GGA3,NUDT9,…
0.00589632292456315	PDE5A,PRPF4,FKBP15	PRPF6,ZC3HAV1,ZC3H15,GGA3,IGFALS,F2,RBM10,PPP1R14A,CADM1,DPP8,DOCK9,MYCBP,CXorf38,KRT14,NAA10,RPS7,TTR,ELOC,KIF2A,CSN2,LAMTOR4,ACAN,METTL2B,TRIM2,PDE5A,PRKDC,DEF6,ABCF1,GPX3,FAT1,ZC3H12A,IFIH1,TAB3,DDX3X,G3BP1,STIP1,DBNL,SEPT9,EIF4G1,EIF3C,DUSP12,LALBA,RNASET2,PKN2,SZRD1,CMC1,FBXW8,ZNF598,SUMO2,NUPL2,DTX3L,MPDZ,LCP2,PLTP,NFKBIE,CHCHD3,PSMD3,FPGT,MRPS2,TRPT1,PPID,DCTN5,FRMD4A,EIF2B3,EEF1D,PRPF4,PR…
0.00516969514071662	PPP1R12A,LUZP1,FLNA,AP2A1,SMAD3,RBM39,CAPZB,AP2M1,PALLD	CALD1,COL16A1,PPP1R12A,MARCKS,LUZP1,PCNP,HGS,ZC3H13,PLVAP,RCHY1,DDA1,SEPT9,ZNF460,ZC2HC1A,FLNA,BLOC1S5,ROCK2,UBTF,INTS12,AP2A1,BCAP31,IK,HPF1,GATAD2B,NDUFA7,IPO13,SMC1A,WRAP53,BPI,MRPS10,PTBP1,REEP4,SMAD3,ATP5B,CCDC50,EIF4B,C17orf80,TOR1AIP2,SPOUT1,RBM39,PPIA,RPS15A,NUDT16,ANAPC4,PSMB3,DHRS11,RPL37A,DDX1,CYR61,ATG9A,LIN54,ENAH,FHL3,OCLN,SLC12A2,UPP1,KIAA1191,TRIP10,SPARC,MFAP2,SECISBP2L,CAPZB,ATP…
0.00038472207669728	PALLD,FLNA,NEXN,RAI14,IKBIP,PPP1R12A,MYO18A,RPA2,SPECC1,MYO5A,CLTC	FHL3,PALLD,FLNA,NEXN,COL11A1,ITGA11,FNDC1,CSRP2,COL5A2,COL12A1,ILK,RAI14,IKBIP,ZYX,STK17B,TGFB1I1,TMSB4X,CALD1,HIST1H4A,SPARC,PPP1R12A,KRT77,SMTN,RBMS2,MXRA5,SULF1,LOXL1,MYO18A,HABP4,COL1A2,KIAA0513,COL16A1,RPA2,VPS8,PARVA,CDH11,POLR2F,UBE3A,CHDH,SPECC1,SRRM1,CRTAP,MYO5A,HEATR5A,TRAPPC5,AEBP1,PHLDA3,TBC1D10C,PAFAH1B1,JCAD,AP4S1,DYSF,UBA6,PKN1,MKRN1,DUS2,HDLBP,SEPT9,VWA5A,CRIP2,ITSN2,PLS3,ALDH18A1…
0.00516969514071662	IKBIP,LUZP1,PPP1R12A,NEXN,DBN1,TPM4,TPM1,PALLD,MYO5A	TRIP10,IKBIP,PXN,CSRP2,FHL3,GPX8,SEC24D,PRDX2,AP2S1,YBX3,ARID1A,INTS12,COL11A1,CDH11,COL12A1,HOMER3,NOTCH3,MYO9B,LUZP1,PPP1R12A,WDFY3,ATL3,GSTM2,ROCK1,EMILIN1,NEXN,MXRA7,DBN1,ENAH,TPM4,LYPLA1,SCGN,ERC1,LRRC47,EIF1B,NDUFAB1,OSGEPL1,NDUFV2,NIPSNAP2,TRNAU1AP,REEP3,PLXDC2,LRP1,VGLL4,CIZ1,STC2,SH3PXD2B,SULF1,SNW1,CD55,MSRB3,RPL35,GLMP,SMTN,TRIM26,MX2,TPM1,SPATS2L,BPI,SGSH,ZCCHC6,HIST1H1B,DNAJC21,GLIPR…
0.00038472207669728	FLNA,FBLIM1,PALLD,LUZP1,RPA2,MYH9,PPP1R18,AFAP1,MPRIP,ANTXR1,RANBP2	CSRP2,CALD1,THBS1,PDLIM5,CNN2,ILK,MXRA5,FLNA,FBLIM1,EFEMP2,PALLD,C1orf226,ITGBL1,MFAP2,YBX3,HOOK3,SULF1,MYH10,GLIPR2,FMNL3,MAP4K5,PTRH1,NUP93,LUZP1,STK38L,RPA2,PPP6R1,ARHGEF7,ZYX,TAGLN,MYH9,VGLL4,VIPAS39,GSTM2,IGFBP3,GUF1,PPP1R18,SLC16A3,PDLIM2,AFAP1,MOCS3,MPRIP,PBLD,THBS2,CEP120,TXNRD3,STK10,RHOB,THBS3,ANTXR1,POLR2M,FAM133B,NAV1,EIF3C,PGAM5,CTU1,NOP58,ZC3H15,SNX2,SHC1,SMG9,ITGA11,FBXO3,BPHL,CNN3…
9.0367665194449e-05	TPM2,NEXN,PALLD,RAI14,TPM1,FLNA,IKBIP,CAMK2G,MPRIP,DAPK3,CORO1B,IGSF8	ILK,MXRA5,TPM2,NEXN,PALLD,LMCD1,CNN2,PDLIM2,COL11A1,FERMT2,RAI14,FHL3,COL12A1,TPM1,P3H1,CSK,FLNA,TRIP10,IKBIP,SNX2,IGFBP7,EFEMP2,SEC23A,UQCRB,KLC1,CAMK2G,PML,GLIPR2,GPX8,PCCA,PLS3,KANK2,COPZ2,CDH11,SPATS2L,PARVG,ALDH6A1,MRPL2,ELMO1,C1orf198,RAB31,TNS3,DOCK5,PPP4R1,NRP2,MPRIP,RBMS2,EFHD2,PSAP,GGA2,TNFAIP8,ALDH1L2,EMILIN1,ZAP70,NDUFS5,HSD17B11,DAPK3,PDK1,CYC1,MTMR3,CORO1B,COMP,WDR24,BET1L,UQCRH,SWA…
0.00038472207669728	FLNA,MYO5A,AP2M1,PALLD,GPC1,IKBIP,PLEC,NEXN,CMIP,TPRN,MYO5C	FLNA,MYO5A,PAFAH1B1,CSRP1,DYRK1A,GP2,NNMT,EMILIN1,P3H1,FHL3,AP2M1,PALLD,REEP5,SULF1,C1QC,LRRFIP2,SPARC,TBC1D5,P3H4,COL5A1,PIKFYVE,GPC1,PLEKHA5,RPS7,IKBIP,PRKG1,ILK,BOLA1,LMO7,PLEC,POLR2L,SDCCAG3,ZZEF1,GUF1,RAB28,MRC2,PPP3CA,CAB39,SRRM1,BCHE,BMP1,NEXN,ARHGEF17,RIC8A,TMEM87A,COL5A2,SRGAP2,CMIP,LMOD1,MGAT1,MYH10,TPRN,EPB41L1,FHL2,RBM8A,TUBB4A,H3F3A,MARC1,ACSL4,PVALB,WFS1,TDRKH,PAM,CHKA,RALGPS2,FTSJ3…
0.00148557441751483	PALLD,FLNA,NEXN,RAI14,MYO5A,RPA2,MPRIP,CLTB,SPECC1,PDLIM7	FHL3,PALLD,FLNA,COL11A1,ITGA11,CALD1,SPARC,NEXN,TGFB1I1,COL5A2,COPZ2,MXRA5,RAI14,MYO5A,THBS2,RBMS2,SMTN,KRT77,LOXL1,SULF1,COL12A1,CSRP2,TUBB2A,CRTAP,ZYX,CHDH,LIX1L,RPA2,MPRIP,CDH11,OLFML2B,CLTB,ROCK2,RNASEL,EOGT,DEFA3,SPECC1,SGSH,MYADM,ECSIT,HIST1H4A,STK17B,PAWR,APBB1IP,OCIAD1,EIF1B,TRIM4,SAR1A,AUP1,POLI,EPS8L1,SLC25A20,C18orf25,EIF3M,RICTOR,HABP4,ENO3,RIT1,FAM172A,NMT1,NCOA2,PRSS8,SUPT6H,ACTN1,C…
0.00148557441751483	LGALS1,PALLD,MPRIP,IKBIP,TPM1,TPM2,PLEC,FBLIM1,FLNA,TJP1	MXRA5,LGALS1,SEC24B,COL12A1,PALLD,THBS1,UQCRB,MPRIP,IKBIP,TP53I3,LOXL2,TGFBI,TPM1,CELF1,CNN2,CARS,CHD1,CTIF,MSRB3,TTC9C,PADI4,CSRP2,COL11A1,SYNJ1,PDLIM4,PDLIM5,TPM2,COX7C,ZRSR2,KLC1,PLEC,CLEC11A,SULF2,YWHAQ,FHL3,ILK,PLRG1,FBLIM1,PRKRA,PCMTD1,HTRA3,SULF1,TIMM29,EPN1,SPECC1L,SNX2,MAP1LC3B,COMP,PHC2,CAP1,BIRC2,PDPR,EIF4G2,RBM34,UBE3A,LIMS1,GULP1,MFAP2,FLNA,EMILIN2,SCO1,RBMS2,EIF2B5,GNPDA1,EIF1AX,PLC…
0.00216451233674398	LSP1,SIPA1,TUFM,TIA1,TCERG1	RIPOR1,MSN,FMNL3,DRAP1,TRIP10,LSP1,RPS6KA4,CCDC50,CXorf38,SETDB1,ARPC3,TBC1D2B,ANKRD52,SIPA1,IK,UBTF,DOCK10,HOOK3,LIMK1,GIMAP4,TUFM,YPEL5,NUCB2,LSM6,RPS11,DGKA,XPC,GTF2F1,MFAP2,DCTN3,RBMXL1,SRP9,HIST2H2AB,HECTD1,MYO9B,GPI,GGA3,MIF,ROCK1,RPL13A,UBXN1,ARHGEF1,RAPGEF1,VASP,EIF4EBP1,BTK,CHGB,CELF2,EPB41L2,HSCB,ATRX,PRKACB,ISY1,DGKZ,UNC13D,DNAJC7,PARP4,ADAP2,TIA1,ABRAXAS2,DNAAF2,ARRB2,CSTF2T,MRPL13,CN…
0.000245184785897357	FOSL2,SPAST,JUNB,FHL3,RPL21	P4HA2,PLAU,CNN2,CNN3,FOSL2,MXRA5,PPP1R13L,COL11A1,PALLD,SPAST,FHL2,FBXO18,COL12A1,ARHGEF18,STAP2,CTGF,ANK1,TIMM10,TPM4,FAM129A,JUNB,BIRC6,MTG1,DMTN,DNAJB6,NT5E,S100B,POLD3,SEPT2,FHL3,CPZ,ENPP2,TMOD1,SDC1,SOS1,TRIM33,SH3GL1,LUZP1,PLOD2,SULF1,TPP2,RRAS2,GSTO1,POLR3D,PPP3R1,AGO2,THBS2,FBLN1,PYGB,ZAP70,CTSK,CDK5RAP1,CCAR2,UMPS,GNPNAT1,LTBP1,SLC4A1,DNM1,PRPF38A,HMGCL,HOPX,DDX17,PPP2CB,ALYREF,DPYD,PSMD…
0.00482025397384366	SMC1A,SLU7,GATAD2B,INTS12	MARK2,PCNP,PRRC2C,SUMO3,RBM14,ZFP91,TCOF1,MARCKS,ZNF787,THRAP3,SMC1A,HGS,SERBP1,SWAP70,UBL5,CNBP,CLTA,KANSL2,DNAJC8,YLPM1,PPIL1,PHF5A,PTBP1,GATAD2A,EIF4B,MAEA,SLU7,ACIN1,GATAD2B,ZRANB2,NCBP3,SDCCAG3,WBP11,CSTF2T,CPEB4,PHB2,LSM5,SEPT7,ZC2HC1A,ATN1,NUDT16,SRSF7,ZNF460,PLRG1,NUBP1,VWA8,GCHFR,CHMP4B,STRN3,KANK3,DTX2,SLC4A7,LSM12,MICU1,GSR,STXBP1,DCTN6,MED8,NCBP1,SRSF9,LDAH,HPF1,ZNRF2,SUSD2,NT5C3B,RPL…
0.0045809224202325	FOXK1,EEF1D,NAA10,FOXK2,PDGFRB	SNRPD2,ZNRD1,POLR1B,COLGALT1,AKAP8,POLR1E,CLPP,CHDH,CIT,SURF6,CPNE1,DTWD2,SMNDC1,MRPS16,RAB28,PDIA4,IQSEC2,PFDN2,NAA15,PAG1,FOXK1,MAN2A1,EEF1D,POU2F1,MRPS23,PBLD,MRPL9,SEC24B,SF3B6,FBXL15,NFATC3,PNN,PRSS8,SNRPA1,BAG3,PLVAP,NUDT3,IMPA1,MRPL19,EPRS,NDUFB11,ZC3H15,HSPA9,MYO1F,CTU1,NAA10,PSMD8,UCK2,ZNF446,RPS25,RANBP1,ITGB5,MRPL11,KDM3B,SLBP,FXR2,MUC1,HTRA1,ZFR,C4B,NUPL2,RAB27B,UTP14A,FOXK2,COL18A1,M…
0.000519207199076098	DRAP1,THRAP3,IRF2,FOXK2,YTHDC1,DMAP1,SMARCA1	TAF15,MED8,LSM6,INTS12,BRD2,FAM103A1,POLRMT,PRODH,ZFR,NCBP3,DR1,EAF1,RABGAP1,ERCC2,DRAP1,THRAP3,SLIRP,YTHDF3,DDX23,GGT5,POLR2E,ELOC,MUC1,VCPIP1,SF3B2,MRM3,CAPRIN1,MPP6,PNN,ISY1,PODN,SRRM2,MYCBP,CCDC43,S100P,TNFSF12,LRRC41,PLAT,SMG8,MTERF3,U2SURP,BPIFB1,CDC73,SEPT9,IRF2,PRR12,CLDN7,TACSTD2,FOXK2,HBA1,RBMX,COL14A1,YTHDC1,DMAP1,OARD1,PCCA,MEPCE,SMARCA1,NUDT18,BUB3,TIMM29,KDM4A,KRI1,DNAJC19,ALDH1L1,P…
0.00289676178276147	YTHDC1,FOXK2,DRAP1,MAP1B,ADNP,KANSL2	SNAP29,RDH13,MAN1A1,ELOC,NDUFA5,ASPSCR1,UBE2V2,ALB,IKBKB,TCEA1,RANBP2,SAMD1,CHMP3,YTHDC1,OPLAH,FOXK2,WDR54,NMNAT1,PANK4,DRAP1,RPS6KB2,OARD1,AKAP8,SETD7,COA7,MYL6B,LSM6,LYSMD1,USF2,SMAP2,ERAP2,SPAST,PPM1G,MDH1,TTC9C,PI4KB,BUD13,MRPL34,AK4,MAP1B,ARMC6,RFTN1,ACOT13,MARK2,GM2A,OPHN1,DTWD2,PSMB5,ILKAP,GALNT7,ADNP,MCTS1,DDB2,TMOD1,DAGLB,MED6,CHTOP,AP3M2,PPA2,SUSD2,MRPS34,CHCHD3,LARP7,CLEC3A,RBMXL1,PLCB…
0.000935349152883111	MARK2,ABCF1,FRYL	SRSF3,EIF3A,ZNF787,RPS26,SARNP,RPS11,HGS,PNN,GID8,MARK2,GATAD2B,PTBP1,ELOA,ZFP91,RBM14,RPS29,TMEM263,NDUFA7,TXLNA,SUMO3,SAR1A,SMC1A,MARCKS,RPL32,GRN,ISY1,MRPS15,CWC22,EIF5A,CCDC9,SBSPON,DDA1,VAMP8,PPP1R14A,DBNL,KANSL2,MED8,SRSF4,YTHDC1,UBTF,MLST8,INTS12,MED16,MTG1,SOD3,C19orf53,ABLIM1,PPFIBP1,C19orf47,JUP,LAMA5,ZC3H13,ZCCHC3,SH3GLB1,ARL6IP4,YY1,CHMP5,MRPL1,CRBN,STON1,PYDC1,F13B,SNW1,TNS1,RECQL5,B…
5.81157687476393e-05	NIFK,EBNA1BP2,FTSJ3,SERBP1,KNOP1,EIF5B,SRP68,GPATCH4,NSA2	MARK2,EIF3C,YBX1,OSBPL11,PPM1G,ABCF1,SURF6,BZW2,ELL,UTP3,UQCR11,TOP1,RSL1D1,RPL32,SMARCA4,RBBP6,NIFK,NOP14,VAMP8,TATDN3,RRP1,EBNA1BP2,PPP1R11,NOP16,FTSJ3,SERBP1,KIAA1143,NUB1,KNOP1,EIF5B,DNAJC7,MIB1,AGPAT3,ELOA,SLAIN2,RPL13A,HNRNPDL,PHF5A,C19orf47,NDUFV2,PRPF6,INO80E,RPS26,RRP1B,SEPT2,MED25,MRPS18A,EEF1D,CHTOP,ZNF598,IL6ST,EIF4G1,NOL7,ZNF668,TXLNA,ATP5B,CUTC,YARS,SRP68,RAB10,CCDC124,COX5B,AHCTF1,…
0.00802650981642145	DDB1,PSMC4,CNBP,RBM14,NIFK,MYBBP1A	NOL8,KAT8,ADAM17,PTBP1,ARL3,PPIE,SPP1,SNRNP70,RHOB,POLR2M,WDR7,NDUFS6,PKP4,PSMD9,MARCKSL1,DIEXF,PYCARD,PPP1R11,DDB1,CCT6A,LTBP2,PLA2G15,HDGFL2,ASNA1,RPL35,RPL23A,SAR1A,SH3BGRL3,PDXK,PKN2,PSMC5,INTS12,SDE2,RNF14,S100A10,PCNP,TCEAL4,PPP1R12C,LAMTOR3,PSMC4,USF2,MARCKS,MED20,RBM28,SP1,CDKN2AIP,POLR2E,COMMD10,FAM192A,PROM1,ZBTB14,GNB2,DAP,UCHL5,POLDIP3,CNBP,CCDC9,PDHB,BOD1L1,CSTB,ATG7,ZNF460,SCAMP1,TM…
0.00705933644781005	SRSF3,DDX1,RASA1,ACTBL2,CWC22,PDS5B,PRRC2C,YBX3,EIF3C,RBM26,GNB2,ATXN2,SPECC1L	SP3,SMC1A,ZFYVE21,PHF5A,SRSF3,RPS15A,TRAFD1,SPINT2,MARK2,HSD17B10,ADO,COX17,AP5M1,SUMO3,DDX1,PHKG2,LBH,RASA1,ACTBL2,HDGFL2,CHMP5,GRN,NCBP2,ASNA1,C1QA,OSGEP,MAZ,ZFP91,INO80E,U2AF2,RPS19,PPP4C,SRSF6,NIPBL,PRPF38B,CWC22,PIK3CG,TNFAIP8L2,HDDC3,FOSL2,UBN1,PLRG1,SAR1A,RPL28,AP2A2,QTRT2,ELL,NDUFA7,ZC3H18,CUTA,MAEA,ZC3H11A,RBMXL1,PDS5B,RCOR1,RFLNB,ZCRB1,MRPS12,PRRC2C,ZC3H13,EEF1AKMT2,YBX3,RPS29,SEPT8,SAP…
0.00156297971001193	HSP90AB1,EWSR1,TRIM25,PABPN1,GOT2,FN1,FBXO6,PRPF40A,AP2M1	RPLP2,HIST1H4A,HSP90AB1,HNRNPL,EWSR1,ARMC8,PAIP1,EIF6,EMC9,BAX,C8G,H6PD,IFI30,TRIM25,ILF2,PRKAA1,COL4A2,UQCRB,RPS15,TFAM,SERPINB10,AHCY,FANCI,PABPN1,DAPK3,ARHGEF7,OSBPL9,ITIH2,TAF9B,TSR3,C20orf27,GOT2,TTC27,MFN2,ADD1,UQCC1,NEU1,CSRP2,U2AF2,KPNB1,TRIP13,CTSH,SUMF1,CALR,UBAC1,SEPT4,APOBEC3F,RBM33,RANBP1,MALT1,TBCD,GEMIN4,KDM3B,FN1,NBEAL2,IPO11,XPO6,GOSR2,RAB3GAP1,RPP25,RMND5A,HSPBAP1,MOV10,ELP3,UBE…
0.000966861703806156	USP9X,PRPF8,SRP54,UBL4A,UBR5,LPIN1	HAUS6,KRT17,ZNF598,PRPF6,CALR,SERPINC1,TOM1,SORBS1,USP9X,RBM14,CANT1,FKBP11,RPL4,NOP9,POLR3D,PRPF8,ARVCF,TYW5,HRG,TRIM25,EML4,OTULIN,MGMT,RPL17,AP1B1,RPL10A,NUDT9,CPN1,CTNNBL1,CNOT11,RDH14,TRIM14,ABHD14B,LIMCH1,CFL2,SLC44A2,IFI35,AUH,GMPPB,TUFM,ALDH1A3,PARVG,PRPF40A,ALDH1B1,MBL2,ETV6,AIFM2,ATG3,CPSF1,AP2A1,UBE2F,COPS7A,PML,STRADA,SRP54,UBL4A,NUMB,MRPL33,UBR5,SRSF11,TSN,SGTB,TIMM44,DHX29,CCNL1,RPN…
0.00169346679858084	PTPN9,MMS19,GEMIN2	IDH2,NAA15,FUS,C1orf35,SNRPD3,PTPN9,EEF1D,MMS19,C1orf198,EIF3A,NSD2,WIZ,CADM1,DCLK1,GTPBP10,GEMIN2,NUP98,NSA2,POLR2H,MBLAC2,FPGT,PTMS,ZC3H15,CWC15,STEAP4,TPR,AP2A1,DLGAP4,PABPN1,MAP1S,RSBN1,NNT,TUT1,INF2,PFDN6,EIF2S1,TLN1,DCAF13,ENDOD1,PHB2,ZBTB7A,PPP1R9A,GIPC1,CTHRC1,MAD1L1,SKIV2L2,C2orf49,SRSF9,CHGB,EMC2,UNC45A,VWA8,SDCCAG3,MRNIP,RBM19,TFB2M,USP11,CAPRIN1,AMPH,MYO1C,DPY30,ATPAF1,TRMT10C,CASP3,U…
0.00854121907456476	GGCT,ZNF598	SMARCA4,PIGT,TIMP1,BZW2,GGCT,RPS2,NUP93,YIPF3,PCYOX1L,RPL38,TMEM214,RAB43,ZNF638,SMC3,PPP1R14B,LARP4,IFT80,MRPL2,GSK3B,RPL23A,KIF3B,SH3YL1,ARL6IP1,PMS1,LARP4B,GSTM2,AARS,EIF2S3,HM13,SPTLC2,SMG8,CSDE1,KIF5B,HTATSF1,ESRP2,NDUFB10,NSDHL,ENO2,REXO4,STC2,ABCF1,IRS2,FAM192A,VAMP8,EEF1D,RFXANK,PRPF6,HNRNPM,SNRPA,EXOSC5,DNPEP,SON,SEPT2,TOMM70,HP,PHF5A,DNAJC10,RPS11,NAA15,RPS3A,WDR43,CHTOP,UBR4,CLIC6,TPD5…
0.00248042910427077	ELAVL1,HDAC4,DCLK1,CSNK1A1,CRTC2	CD99L2,DNAJB4,SOAT1,ERP29,SNRPN,CARTPT,URGCP,NFATC3,KCMF1,TPR,ELAVL1,YTHDC1,NHP2,ACSS3,IRS2,BET1,MAN2A1,TNPO2,SPAST,NUP188,BUD31,PSMD8,USP10,ATG9A,TUBB2A,MACF1,REEP4,HDAC4,ATP6V1H,MED8,IGFBP4,BAIAP2L1,PCYOX1L,PPA2,CPB1,NCBP3,ADD3,CCP110,CIR1,NAA15,ATXN3,KANSL3,DCLK1,SRSF9,CSNK1A1,PIK3CB,FKBP2,SUFU,MTHFSD,RBM26,INTS13,FBXO6,THOP1,HNRNPA1,API5,MGRN1,CUL1,CCDC174,TWISTNB,IMP3,WDR74,MROH1,STAU2,CISD3…
0.00484420023886203	DDX20,TRIM25,TNIP2,GEMIN4,HSP90AA1	GALT,RETREG3,MRPL23,ROCK1,PPP2R1A,VKORC1,PDK2,ERCC3,ARL8B,RTN4,PAPD5,TIMMDC1,NUP205,ZFHX3,MRPS18C,DDX52,GPX3,F13B,DOCK4,TIMM29,SBSPON,ARHGAP24,ERCC6L,KLC1,SRPX,GGT5,HNRNPAB,AIMP2,PDK1,TRIM32,EIF2B3,POLG,NQO1,DDX3X,PRRC2B,SPAG9,SH3GLB1,PSMB2,DDX20,SMARCB1,SLC39A10,TRIM25,F8A1,TSPO,TNIP2,GEMIN4,MOB1A,LAIR1,ERH,DDB2,MICU2,ATP5A1,ABCF1,MED26,NME1,SNCG,MYCBP,EHMT1,SIN3A,EAF1,ZFYVE16,CFAP36,ZNF609,AUP1…
0.00484420023886203	DDX20,TRIM25,TNIP2,GEMIN4,HSP90AA1	GALT,RETREG3,MRPL23,ROCK1,PPP2R1A,VKORC1,PDK2,ERCC3,ARL8B,RTN4,PAPD5,TIMMDC1,NUP205,ZFHX3,MRPS18C,DDX52,GPX3,F13B,DOCK4,TIMM29,SBSPON,ARHGAP24,ERCC6L,KLC1,SRPX,GGT5,HNRNPAB,AIMP2,PDK1,TRIM32,EIF2B3,POLG,NQO1,DDX3X,PRRC2B,SPAG9,SH3GLB1,PSMB2,DDX20,SMARCB1,SLC39A10,TRIM25,F8A1,TSPO,TNIP2,GEMIN4,MOB1A,LAIR1,ERH,DDB2,MICU2,ATP5A1,ABCF1,MED26,NME1,SNCG,MYCBP,EHMT1,SIN3A,EAF1,ZFYVE16,CFAP36,ZNF609,AUP1…
0.00934260719469665	PNN,RPS20,CREB1,SPICE1,PTBP1,PPP1CA	GATAD2B,SUMO3,RBM14,PNN,PHF5A,RPL35A,ZFP91,RPS20,RPS11,RBMX,SRRT,RSRC2,MAEA,ATP5B,PCNP,SRSF7,SMC1A,RTCA,RPS21,ACTA1,LSM6,INTS12,UBL5,CREB1,NDUFA7,RBCK1,CHMP1A,TRIM32,USF2,CUL4B,TOMM70,ATP5I,SUMO2,SLC4A2,COMMD3-BMI1,ZFAND6,MED22,ADAP1,BCAS3,POP4,PAWR,SUMO1,SPICE1,ZNF668,ZNF385A,SULF2,ILKAP,HOOK2,CHCHD1,NEK6,ZNF185,PTGR2,SLC25A6,LDHA,ABI2,CLDN7,NKIRAS2,ELOA,TNS1,MIA3,EXOSC1,STXBP3,CTU2,GATAD2A,MESD…
0.000274003197562815	GTPBP4,GNL2,MAK16,NOP2,NSA2,PWP1,NIFK,MYO6	RNF14,STK38,NAE1,GTPBP4,KIF2C,AHNAK,EZH2,EIF4G1,SRBD1,LAS1L,GNL2,UCK2,DDX27,EMC3,SLIT3,LARP4B,CXCL12,PNO1,TFAP2A,DYSF,PAK2,NDUFB10,PRPS2,CSRP1,DPP8,THOC3,LRPPRC,BCHE,TPX2,DLG1,FAM98A,PTPRE,NAA10,MAK16,NOP2,TRAPPC5,PSMG2,PPID,USP10,THOC1,PSMA7,CREG1,DCUN1D5,PIR,CXorf38,CASP14,FAM49A,CDH5,MPZL1,ADD2,FABP5,KSR1,NOC3L,NSA2,EXOSC10,RPS2,PIK3C3,CNN1,PLAA,PWP1,ATG3,NIFK,MPP6,UNC13D,GTPBP10,TSPYL5,ARHGEF…
0.000403374302152905	SLC4A1,HBA1,HBB,OBSL1	HBD,EPB42,SPTA1,BPGM,AHSP,SPTB,CA1,SLC4A1,HBA1,ANK1,HBB,OAS1,STT3B,COMMD2,DNAJC11,EEF1D,HMGCS2,ELMOD2,MXRA7,ANXA7,HMBS,TRIP6,SH3GL1,RNF31,MTPN,LMNB2,LENG8,SUOX,CEP192,FLI1,FGB,SEC63,HID1,MRPS30,DOCK4,TNS1,ADD2,FAF2,CHCHD6,PPP1R14B,FBLN5,SPCS3,CETN3,EMC9,TEFM,ARMC6,COPZ1,CPZ,SRPK2,NUP210,TRIP10,PPIF,CPB1,ARHGEF11,SLK,LCMT1,TCF12,FGFR1OP,CA2,TNXB,GUSB,CSN2,SPARCL1,VCPIP1,USP14,LUC7L3,TBPL1,UBE3B,KH…
0.00527038049254441	HBB,SLC4A1,HBA1	HBD,HBB,EPB42,CA1,SLC4A1,SNCA,HBA1,ANK1,SPTB,BPGM,SPTA1,TRIM28,AHSP,PYCR3,COQ7,LIG4,ADD2,SLC1A4,PAXBP1,ARL6,IMPACT,AHCYL2,SGTA,SRP72,BLOC1S3,C7orf25,TARS,CDR2L,RABGGTB,POU2F1,MSTO1,SPAG9,RRAGC,USO1,ALG13,RNF41,GMEB1,CD180,SQSTM1,SCIN,PTX3,VBP1,DOK1,ECHDC3,GSTM2,SFRP1,AIFM1,NAA10,PIGR,ATP6V1H,NUDT9,HNMT,AK2,MRPS21,UBTD2,EHBP1,WDFY3,GEMIN2,NDUFAF5,DIP2B,EMILIN2,ELOC,SULF1,CMPK1,ELP2,INHBA,PACS1,THO…
0.00527038049254441	HBB,HBA1,SLC4A1	CA1,CHMP7,AHSP,SPTA1,ANK1,GMPPA,EPB42,CCT2,YOD1,CAT,DMTN,GPRC5A,BPGM,ADD2,TPBG,HBD,CCDC88A,CACNA2D1,SUCLA2,SNCA,BCL10,HBB,TMLHE,SPTB,HBA1,SLC2A1,CCT7,PTRH2,LYAR,PGRMC2,UBASH3B,MIF,DHODH,TIMM17B,NKRF,NEDD4L,SLC27A4,HIST2H2AB,ABCF1,S100A1,SH3RF1,MMRN2,ABCC1,CASP10,AMOTL2,CCT3,NDUFB1,CCT6A,PHF21A,ADNP,SLC4A1,ARFRP1,POLA1,PPP1R14B,NOM1,PIK3C2B,TEP1,ALAD,CLIP1,ATAT1,MAN1B1,RAP2B,PITPNM1,TCEAL3,LRRC59,…
0.000403374302152905	SLC4A1,HSD17B10,HBA1,HBB	NDUFA7,ZNF787,SRSF3,HDDC3,TPRKB,HGS,SPTB,DDA1,SARNP,GPATCH8,AHSP,ISY1,LAMTOR3,TBCA,SLC4A1,TXLNA,MARK2,EPB42,CIZ1,UBL5,DDB1,SDE2,HCFC2,HBG1,SZRD1,THOC7,CD180,HSD17B10,EEF1A1,VCP,SAR1A,NUP43,MARCKS,CCDC86,HBD,RPL22,XRCC5,CREB1,YOD1,ARF4,CA2,EXOSC6,APEX1,CD59,ELP1,WDR82,IPO8,EIF3M,HBA1,ANP32A,SREK1,ADD2,SLC2A1,DNAJC17,UBAC1,DDX1,GTPBP10,TRIM36,RPA1,HBB,LSM1,PLOD3,ZNF385A,CA1,KCTD10,GATC,HERC5,SNX9,B…
0.00364058289939207	LMAN2,HNRNPD,SGTB	IRF2,BPIFB1,TRIM2,KRT14,RECQL5,PIGR,OSBPL11,ZNF609,POLR3E,ERCC2,ARIH1,WDR55,ANP32A,GOSR1,CRYBG3,ARHGEF37,CUL4B,HP,SYNM,EIF1,DYM,RAPGEF1,GSN,SERPINA4,CARD9,ARL6IP5,LDAH,SERPINF1,UBE2G2,SETX,PPP1R14A,COPS5,HPR,LRG1,SF3B1,AKAP13,NDRG1,POLR3D,PLRG1,KRT5,SCAMP1,ENPP1,TMX1,EIF4EBP1,STX6,KRT15,HBG1,LDHB,C14orf159,TRIM29,INPP1,CHMP4B,XPA,TUBB4A,TBL2,HEXB,CA8,PAFAH1B2,BAIAP2L1,SPTLC2,REEP4,FGF2,NOP14,PLTP…
0.00689728285801005	PRKAB1,HEATR6	NOL8,ZNF668,TPRKB,CUTA,RREB1,PRKAB1,NUDT18,MRPL55,ATP5D,ELOA,USP36,SRCAP,PCYOX1,ROCK1,PRRC2C,ATXN2,MARCKSL1,ATP5B,DBR1,HSPB11,YIPF3,GALT,WDR33,RNF40,LAMTOR3,SNAPIN,NDUFA11,PNN,ZC2HC1A,CPSF2,SAR1A,RPL32,BPIFB1,NHLRC2,MTDH,KDM6A,ASNA1,POFUT1,PLA2G4A,ISY1,SETD2,INTS12,TPR,TXLNA,MRPS15,RBBP6,PPP1R18,EIF3A,RNPS1,DHRS11,ZFAND3,REXO4,NOP16,CREB1,CTSD,HBA1,PLEC,HEATR6,ACTBL2,ECHDC1,FKBP1A,ACSS1,SS18L1,ZF…
0.00216259211525536	PRKDC,FANCI,CHD4,RFC3,NCAPH,DNAJA1,MCM6,NASP,SMC4,MCM5,LRPPRC,COPS5,H3F3A	NAA15,PRKDC,RPS2,EEF2,CPA3,GMPR2,LARP4B,FANCI,TMEM33,CHD4,XPO5,RFC3,CST3,IPO9,BIRC6,SVEP1,NOSTRIN,POLD1,SHMT2,DNMT3A,HYI,SPG21,UPP1,ALDH6A1,TTI1,ALAD,NCAPH,SND1,USP9X,PLAU,DNAJA1,MFAP4,WDR43,ADI1,MCM6,CMSS1,LSG1,PABPC1,EEF1G,PSME4,NASP,FAM172A,PLOD3,SMG9,ACADS,UBE2A,LSP1,SCYL2,SMC4,MCM5,ARHGEF40,INTS3,AGPS,USP3,PCCA,LACTB2,INTS7,CHAD,C14orf159,ANGPTL2,LAMA2,CD44,SDC1,HK3,OLFML3,SEPHS2,STAMBP,RPP2…
0.00301538837144076	GATAD2A,GATAD2B,HIST1H2BB,CCDC93,RAI1	RBM14,SARNP,PNN,GATAD2A,MARK2,RSRC2,RPS11,NDUFA7,ZC3H14,GATAD2B,PHF5A,ATXN2L,CBLL1,RPS29,SMAP1,FCER1G,EIF2S3,PPIL1,EIF3C,BLOC1S5,CAPRIN1,USF2,INTS5,EIF5B,RPS19,KCMF1,SNRNP70,ZC3HAV1,HIST1H2BB,AQR,DENND4A,IK,SNRPD2,ELOC,TRIM33,HRG,CNBP,RXRB,RPL27,DIS3L2,MTX3,CMC4,CARS2,TBC1D17,LYAR,LIG1,CCDC93,HNRNPA3,RNF181,GLYR1,CDC73,RAI1,SNAP23,VBP1,CDC5L,SETMAR,LSM14A,PTPN12,UBAP2,ENDOG,U2AF1,USP7,RBM12B,APOO…
0.00343716853593802	PNN,YLPM1,PRRC2A,ACTB,SFPQ,MEPCE,PPIL1,SRRT,ALYREF,SRSF4,FEN1,RBM12B,KRT16,SAFB,CUL4B	SMC1A,SRSF3,ZFP91,PNN,YLPM1,PRRC2A,ACTB,SFPQ,ZNF787,SLTM,PRRC2C,EIF3A,SCAF11,THRAP3,MAZ,ACTBL2,RPS26,HDDC3,FBXL18,PSMA5,MEPCE,COX8A,LBH,ZNF24,PPIL1,CCDC9,NUTF2,STAM,GATAD2B,SRFBP1,RPS19,MAEA,YBX1,RPS29,SRRT,VPS11,NFX1,RBBP6,SULT1A3,SERBP1,HTATSF1,CLCN7,LHPP,DNAJB6,POLR3B,ALYREF,ALDH1L1,NUDT18,KDM4A,RPL10A,SLC4A2,EIF4G3,NDC80,OLFML1,CWC22,SRSF4,LIN7A,GPX1,DCAF1,NOM1,SLIRP,ECT2,EHD4,ZNF579,DPH5,SMA…
0.00834212918686849	TOP1,VCAM1,HSPA8,PHF6,NEDD8,ZFAND6	MSRB3,UFSP2,AFF4,SCPEP1,SHROOM2,CD44,DUS3L,OSGEPL1,TOP1,RCHY1,PIGT,DAP,VCAM1,HSPA8,PHF6,ARF1,UHRF1BP1L,CCDC32,SZRD1,GHDC,TUBA1C,NAXE,SLC44A2,NEDD8,ROCK1,TGS1,CLIP2,ARHGAP18,SERPINC1,SMC6,APOM,RNF214,ZC3H8,PYM1,CTNNBL1,RBM45,DMAC2,STARD5,CHMP2B,ACTA1,MARK2,RFC4,PARN,GGA3,SERPINA6,RABGAP1,ZNF598,MRPL53,COPZ1,SNAP29,ZHX2,FUCA1,C5orf24,COMMD1,APTX,ARHGEF12,CRELD2,RNASEL,EXOSC8,C17orf49,MRPS12,RTL8C,M…
0.00256577030768643	SRSF1,MEPCE,SF1,FUS,CSE1L,CDC73,ELAVL1,HNRNPA0	DPY30,KDM1A,SERPINA3,SRSF1,CBLL1,SSU72,RBM10,NOL6,BUD31,SUPT6H,MRPL51,ENPP2,SLIT3,CHERP,MEPCE,SF1,NUFIP2,CPSF4,LEO1,FUS,KDM2A,MFAP4,SRSF9,GOSR1,ORM1,U2SURP,KIF2A,U2AF1,S100A6,SOD3,DCLK1,NAA15,ILKAP,PLCD1,USP22,CSE1L,SVEP1,MAP1B,ELOC,RNPS1,THUMPD3,RBM45,NACC1,USP16,QSOX1,SMU1,OVCA2,PSMC6,SNRPD2,CDC73,TRPT1,MAOA,NOC2L,SUPT4H1,EHD3,VASN,STXBP2,RBM22,PLTP,ELAVL1,C1orf35,CPSF1,SRP54,TACC3,PRTFDC1,TBC1…
0.000331597480166071	CHERP,STK24,TTR,HNRNPH3,STIP1,HNRNPF,TRIM25	UBE2V2,CHERP,PPIH,PTBP2,PUM1,RBM10,NFKBIE,MCM2,MCM7,COL2A1,TRA2B,MRPS2,HPX,MFAP4,TTN,NDUFAF1,AAMDC,SLIT3,TAF5L,CASP2,EIF5B,STK24,FOXJ3,TTR,HNRNPH3,RAPGEF1,MLF2,CRLF3,NIN,CDK1,ELOC,COA7,IFT80,RPL18A,EIF2B5,AGT,TTC9C,WDR91,XPA,STIP1,RINT1,SNRPA1,ARAF,U2AF1,UBE2S,POLR2F,MRPL18,RMND5A,CHAF1B,RANBP2,GMPS,PRG4,PQBP1,SRP72,ESRP1,TTC4,ANAPC2,CHMP3,OCRL,UTP18,NONO,TOP1,PELO,UTP6,MRPL43,PYCR3,PGLYRP2,GGA3,…
0.00231649513658436	WTAP,SUMO2,SRRT,SNW1,RBM14,SUMO1,DIDO1,API5,SNRPD1,HNRNPA3	GATAD2B,SARNP,SDE2,GATAD2A,ZNF787,PNN,MARK2,CWC22,RPS20,GID8,SMC1A,RBBP6,INTS12,ZFP91,NFX1,WTAP,CREBBP,LBH,PPP1R12C,MED22,SUMO2,ZNF24,UBN1,PHF5A,SUMO3,SAR1A,ACTBL2,SRRT,PPIL1,FCER1G,PRPF6,LAMTOR3,ZC3H13,SRSF3,SNW1,PRRC2A,RPS19,RBM14,PDCD2L,SUMO1,DFFA,BCKDHA,ELOC,KANSL2,COX7A2L,LRRC20,CISD1,SETMAR,NFYA,DIDO1,POT1,CFDP1,EXOSC1,API5,PPP4R2,CBLL1,TIMM8B,GRHL2,WDR1,GPATCH11,SRSF7,NUDT4,ARF4,GPRC5A,PTD…
0.00778324505848469	SRRT,RPS26,SFPQ,SRRM1,CUL3,THRAP3,SNW1,KRT16,RPS15A	PNN,SLTM,SRFBP1,SRRT,ARID1A,RBBP6,RPS26,RABGAP1L,SMC1A,EIF4B,ZC3H4,SMAD5,INTS12,CENPB,ZC3H13,ZNF787,LUC7L3,SFPQ,MRPS18A,CDKN2AIP,ACTB,MFAP1,ZBTB14,BLOC1S5,PPP1R12C,ACTBL2,RPS29,ZFAND3,ADRM1,KIAA1143,PAIP2,RPS10,EFHD2,CHCHD3,NDUFA7,GABPB1,SNRNP70,FUBP3,LSM7,IDNK,FLYWCH2,MCMBP,VPS33B,MLST8,COMMD5,CHMP5,SRRM1,CUL3,DCTN1,SEPT9,SAFB,EZH2,THRAP3,HADHB,TG,SNW1,DIABLO,AK3,KRT16,RSRC2,OARD1,ARPC1A,RPS15A,…
0.000660831699147958	RBM14,RPL18A,SRRT,RPL19,RPS11,TIMM9,RBMX,RANBP2,HEXIM1,NONO,U2AF1	HOOK2,RBM14,PHF5A,GATAD2B,ZC3HAV1,LSM6,BPIFB1,RPL18A,USF2,GATAD2A,SRSF7,PML,CD163,RPS19,TARS,EIF2S3,CACYBP,EFHD2,SRRT,SDF4,SETD7,TBPL1,SNRPA,ARCN1,SUMO2,RPS20,RPL19,PTPN11,SLK,RPS11,MICALL1,TIMM9,RBMX,TTC9,SNX2,CHMP2A,NAP1L1,MAX,ATP5E,MAD1L1,DDB1,CPSF7,ARID1A,FAM208B,XPA,LMOD1,RPL27A,RBKS,EIF2S1,WDR55,NUDCD1,BZW1,XRCC6,IDI1,ATXN10,GOPC,PAIP2,GREM1,BCL9L,C1orf52,RANBP2,YTHDC1,CSNK2A2,RPP30,SUCLG2,…
0.000660831699147958	SRRT,RBM14,RPS26,SRSF3,RPS11,THRAP3,HNRNPH1,CDC37,SEC16A,PRRC2A,SMARCB1	ZFP91,SRRT,RPS18,RBM14,RPS26,PRRC2C,SRSF3,RNF40,GATAD2A,MARCKS,SUMO3,PNN,CLTB,ATXN2L,DNAJC8,SMAD5,MRPS18A,ZC3H13,RPS11,SNRNP70,CARHSP1,THRAP3,PRRC2B,ARID1A,PPP1R12C,MARK2,CCDC9,ATRX,RPL29,ZNF787,MAEA,LUC7L3,HNRNPH1,WDR33,XAB2,COX8A,TRAFD1,XAF1,ZNF385A,TIMM10,NCBP3,NFXL1,POLR2I,LRRC41,AZGP1,C4B,KDM4A,ANP32B,ECT2,MYBBP1A,KHDRBS1,POLD1,ISCA2,SOD3,MRPL2,MESD,ACOT7,SGF29,CSTA,EPHB4,BLOC1S3,RPS6KC1,GUC…
0.000362293958729847	C19orf53,CHD4,UBTF,RPS26,SAFB,RPS21,MRGBP,RPL17,KRI1,TPR,THRAP3,MEPCE,RPS2,RFC2,TMPO,LUC7L3,SRP72	RBM14,ELOC,SIN3A,REPIN1,SUMO1,KANSL2,GATAD2A,SLC4A1AP,ILKAP,CPSF4,PNN,ELL,UQCRQ,CNBP,C19orf53,ADNP,SRP14,COMMD10,TIMP1,GGT5,SMC3,TRAPPC4,PRPF6,ARID1A,ABHD14B,CHD4,ACSS2,KIAA0907,SGTA,RDH11,PXK,ZFAND6,RBBP6,ABHD12,UBTF,YTHDC1,RPS26,PHF5A,C19orf47,SAFB,SNX9,PSMD3,CELF1,MARK2,RPS21,EIF2S1,POLR1B,BUD13,ACSS3,COMMD3,PDS5A,PPP2R2A,NDUFA4,UMPS,ELOA,DYNLL1,LUC7L2,MRGBP,RPL17,ASCC3,SAP30,ZNF326,MSRA,NUP93…
0.00986469179684004		CCDC58,GNPDA2,C8G,SF3B2,TPM1,AHCY,AP1B1,OTULIN,CDK12,SERPINF2,ZMAT2,CXCL12,SPRYD3,YLPM1,KLHL42,C19orf66,GNG2,PSD4,CBLL1,REEP4,SLC4A1,UQCRC1,EHD3,ALDH1B1,PTMA,TSR2,NAA30,KMT2D,RPL38,SRRT,ITGA6,VAMP3,CRELD2,SP1,BORCS6,ROBO1,ALDH1A1,SERPINE2,APOF,PRPSAP2,BDH2,PHF21A,SPON1,LAS1L,DENND6A,TTC9,ZBTB8OS,MARK2,NUP214,TRUB1,MNAT1,RIT1,AKR1B1,SELENBP1,TSC1,SHKBP1,DIS3,GTPBP4,GPS2,ARID1A,EPB41L5,RAB32,NOP56,…
0.00986469179684004		EIF2S3,NCDN,CEP170,TRMT61B,TAPBP,ACSS3,RPL18A,RPS11,OPTN,MRM3,SFXN2,SRCIN1,AKAP13,SUMO2,GUCY1A3,EHBP1L1,USP9X,ZFP36L1,FCER1G,CFP,GATAD2A,UBL5,CMC4,ZC3H11A,LSM1,MNDA,CARS,ABCF1,PGAM1,EEF1D,PLAUR,ANXA1,ARF1,RARS,RAB28,TTC27,CCDC93,NPEPL1,TGFBRAP1,HGS,FKBP15,ABCE1,SPATS2L,EPHB3,IDO1,RFX5,AKR7A2,RRP1,PI4K2B,C1orf226,IARS,RFTN1,NCEH1,PHF5A,IQSEC1,MCMBP,FOXA1,YIPF3,DSC2,AIMP1,NAA15,ANAPC4,CRELD2,RANBP2…
0.00413186527199045	PTBP1,HTATSF1,CHD4,POLR2E	PNN,MARK2,ATXN2L,ZNF787,PTBP1,SARNP,SLU7,PCNP,BCLAF1,ZNF638,RPL35A,SCAF11,SRRT,EIF4B,RBBP6,NDUFA7,RBM26,TARBP2,ELOA,HTATSF1,MARCKS,LRG1,ABHD14B,YBX1,CP,C4B,CFB,HPX,ZMYM4,LUC7L3,ORM1,F11,SNAP29,ELP3,BOD1L1,ALB,HRG,EFHD2,PRPF6,NDUFA12,FBXL8,CHD4,SNAP23,CDH13,YWHAH,N4BP1,C2,MBD4,USP39,TMEM189-UBE2V1,TIMP1,USP24,SF3B1,PRPF38B,HELZ,COPS7A,APOH,MSRB3,KLC1,RMND1,POLR2E,MRI1,PHF3,C3,RPL7A,TNKS1BP1,HSPA12…
0.00795779955298615	CKB,PIH1D1,UBE2L3,RPS19,PPT1,ACO2,RPL15,C1QBP,UBE2L6,PCMT1,ACLY,TES,HSD17B10	NOTCH2,CKB,SH3PXD2A,ARL1,RPL26,AMPD2,SLK,ATRX,FKBP1A,NDUFA5,AMACR,POLR3E,PIH1D1,TRIP10,TXN2,UBE2L3,RPS19,PPT1,ZFP36L1,LAMTOR5,CPB1,WDR45B,UBE2I,C10orf76,S100A11,ACO2,ELOA,PIP,COQ8A,ALDH7A1,UBE2V2,HMGCS1,TRIOBP,MUC2,MZT1,ING1,EXOC4,SMG7,RPL15,C1QBP,CCDC61,RBMX,UBE2L6,MITF,RPL23A,MAD1L1,PCMT1,TBCC,VPS8,NOTCH3,ASL,REXO4,LRIF1,RCHY1,COPZ1,TWISTNB,ZNF668,LUZP1,DYNLRB1,DBNL,TTC7A,TRIM14,CRTAP,FAM111A,S…
0.00100532334535831	IFIT2,IFIT1,IFIT3,IFIT5,MOV10	XAF1,DTX3L,IFIT2,CIZ1,STAT1,PARP14,TXLNA,TAP2,CSN2,CHCHD3,TBC1D10B,LBH,PRPF6,IRF9,ACTA1,OAS3,PPP1R12C,PSMD5,GABARAP,CHD4,IFIT1,MX1,ATRX,MRPL58,FUNDC2,INTS12,KIF2A,RCSD1,RECQL5,SNW1,FCER1G,IFIT3,NUDT16,PPM1G,SCAF1,NDUFV3,RPS29,ACTBL2,GCC1,IRF5,EMSY,FAM136A,IFIT5,CNOT3,DYNLRB1,PIP,ARAF,ASPN,CHAF1A,USP18,PGM2,ANKRD54,TMEM189-UBE2V1,DROSHA,TAP1,TRIM2,PPP1R11,CARTPT,SIN3A,FBXO6,MOV10,ACAD8,RNF213,MFF,…
0.000437508153914928	LTBP1,IGF1,FHL2	MED18,RPS18,NOP56,AAR2,ATXN2L,NDUFA1,ELL,CPS1,GATAD2A,LTBP1,HGS,SEPT2,ZFAND3,PSMA2,CXorf38,FLYWCH2,ARF4,ADO,HAUS3,GPR107,MARK2,PHF6,GID8,MARCKS,PLA2G15,ZNF668,TARBP2,MZT1,FAM162A,SZRD1,TBPL1,GSTM4,LANCL1,LSM12,TUFT1,NDUFV3,TMX1,CHAMP1,IFT80,CUTC,RPS15A,ABRAXAS2,CXXC1,PDS5A,MRPS18A,RPS26,EHD3,F8A1,PSMD7,DMXL1,RPL32,SF3B5,ZNF787,RPS11,SRSF3,IGF1,HSD17B10,ELOC,FAM91A1,OARD1,AAMDC,FBXO21,NARFL,HNRNPL…
0.0029958117358887	MEPCE,CUL4B,CHD4,PCBP1,LSM3,NUP35,RPS14,MOV10,NOP56,SNRNP70,SON	PNN,PRPF6,EIF3C,NDUFA13,LBP,EIF1B,ELOA,PHF3,EIF1,VAMP8,PTMA,ZC3HAV1,APOH,MEPCE,RBM12,FMOD,CUL4B,STARD7,PLG,PDS5A,CHD4,RREB1,SETD2,THRAP3,NFYA,MED21,PCBP1,SERBP1,ATP5D,VWA1,HMGB2,TF,SAMD1,GEMIN5,LSM3,SAMM50,CD109,TRMT1L,FGA,RBM25,SERPINF2,RBMX2,HDDC3,MPHOSPH6,CAPN7,A2M,CASZ1,NDUFB10,TMEM126A,NUP133,SRP72,SMARCA5,RRP7A,FETUB,YARS2,AS3MT,CMC4,FIS1,NUB1,TBC1D4,DGUOK,DYM,PHKB,CFHR5,RNASE4,GTPBP10,GPX3…
0.000365262336487037	RBM14,RPS11,PPIL1,EIF3A,CNBP,RBMX,RPS19,SYK,PRDX6,VAMP8,SFPQ,PTBP1,FUBP3,EIF3I,CCT6A,PCMT1	GATAD2B,RBM14,FCER1G,RPS29,WTAP,RPS11,ZC3H4,SPCS2,PPP1R12C,PPIL1,ELL,EIF3A,PCNP,TCOF1,MRPS18A,RACK1,CNBP,BOD1L1,RBMX,SZRD1,RPS19,ISY1,SYK,C19orf53,RABGAP1L,ZC3HAV1,HLA-DMB,MAP7D1,ICAM3,PRDX6,RHOA,RPS26,VEZF1,CARTPT,RBBP6,EVI5,VAMP8,KANSL2,MARCKS,ARID1A,RBM6,CWC22,PRKAB1,TMEM263,RPL32,SUMO3,SFPQ,ATRX,INTS12,PTBP1,SCAF1,FUBP3,TAPBP,DOCK10,ZAP70,SART1,UBQLN1,MOB3A,WDFY4,EZH2,ITGAX,ZC3HC1,LYSMD1,RB1,…
0.00854121907456476	ITPR2,NXF1	TRAPPC4,GLRX2,DDB2,RAB1A,C19orf53,SUMO1,USP36,SNCG,CAMK2G,HSPA2,S100A10,NUDT18,ZNF330,PTPN18,BCHE,SIRT2,RCHY1,LANCL1,GOSR2,ESD,RFC1,ATP2A2,HSPH1,WDR11,INTS9,SMG8,GDI1,WDR26,VPS36,WDR61,CLIC1,AFG3L2,PRPF38B,PPP2R5E,PCIF1,CNRIP1,ITPK1,TGS1,UBN1,DDRGK1,KLHL42,FBLIM1,MAP3K6,SCLY,ACTN1,ARL6IP1,PHLDB3,MTDH,ITPR2,ROCK1,RBPMS,CELSR1,INSR,PRDX6,UBTD2,AIDA,TRAPPC1,OAF,NUF2,IREB2,HLA-B,PIN1,TAGLN,DUSP3,NXF1…
0.000403374302152905	ITPR3,PPP1CA,AKT1,ATP2A2	ABCF1,EMC4,ITPR3,CCDC47,SERPINA3,NUP205,TPI1,CUL4B,TAP2,PPP1CA,NUP93,TM9SF3,DCK,TF,ZFYVE16,PRDX2,SRPRB,PHF23,EPHX1,GNPDA1,MRNIP,ATP5D,SERPINA6,AKT1,S100A7,NDUFB3,CTSG,EIF4EBP1,AKR7A2,TXLNA,M6PR,IL1RN,MRPS5,NDUFB5,CSN2,STX5,NDUFB1,GPX3,NISCH,SEC14L2,ASCC3,ENO2,TOMM5,ARL6IP1,APOC3,TFG,PSMB1,NAA15,MROH1,ATP2C1,GTF3C1,PRTN3,POLD3,USMG5,KIF23,TTC38,NOSIP,CHAD,MAN2A1,EIF4G2,GPNMB,WDR55,ATP2A2,GALNS,DYN…
0.00933947066838132	RREB1,ZMYM2,KIF5B,ZMYM4,HMG20B,LEO1,CNOT3,GSE1	SNRNP70,EEF1D,ENPP2,A1BG,SNW1,DCLK1,CSAD,BUD13,C6,GPX3,CUL4B,F2,RREB1,ORM1,ALB,POLR3A,SOD3,SNRPD2,SART1,SERPINF2,PTGDS,SULT1A3,TNS2,ZC3H18,TPR,ZMYM2,HLA-B,MRPS26,DHX30,EEF1A2,PNN,MED22,ESRP2,MAD1L1,PGLYRP2,KIF5B,GTF2E1,ALDH1A1,ADH1B,HSPA12A,PSMD11,ZMYM4,GPX1,PRPF6,RBM22,HMG20B,LEO1,CNOT3,RTF1,ARCN1,APOC3,TTR,SNX33,PCCA,PON1,NUP93,U2SURP,ITGA7,FAM76B,DNAJA1,DIEXF,ZNF638,NUP153,ZFR,APOC4-APOC2,MYO1…
0.00967944465432822	TJP2,OFD1,NISCH	YME1L1,JMJD6,HDGFL2,SCAF8,SUZ12,TJP2,DPH5,SBNO1,NUDT15,DAP,COMMD8,XRCC1,ACTL6A,SPRYD3,ARID1A,GRWD1,ACP5,TAF2,P2RX4,HDDC3,STAU1,TBC1D10B,PYM1,LAMTOR4,RCOR1,AMPD2,RPS11,DNAJC9,ZNF460,NSUN6,TRIR,ARL2,MAP4K3,C19orf47,ECM2,PDHB,PPP1R12C,KIAA1522,SURF2,DNAJC8,OFD1,IGBP1,WRAP53,CHORDC1,PPIL1,INO80E,CLIP1,SETX,THOC7,SMAD5,TUBB,MICU1,CALM1,IDS,SAMD4B,CTCF,AIFM1,CDKN2AIP,HSPBP1,NAA25,USF2,ZRSR2,PFDN6,TRAFD…
0.00854121907456476	KIF16B,ALOX5	VTI1A,PPDPF,CDH1,KIF16B,MAVS,UBTD2,RARRES1,RCCD1,THUMPD3,CD276,NFIB,WDR81,YBEY,DDX17,C3orf38,PTPN7,CHCHD2,RASIP1,SNX2,PIP4K2C,SPATA5,HIST1H2BB,RPAP2,WDR91,COQ10B,KPNA6,GRB10,PMS1,RPUSD2,NUDCD1,DENND6A,ACP1,SART3,TAP2,LYPD3,KTI12,SPECC1L,DIP2B,MAP2K1,DHX35,ADAP2,APLP2,RHOC,SDHA,KLHL36,TOPBP1,HADH,ERAP2,TMEM87A,KYAT3,IMPA1,PGP,TTC38,TANC2,DHX57,ALOX5,ATP7A,PIK3CG,TSPO,FAM117B,APBB2,CAPN13,NAA35,PDX…
0.000241104999526404	KNG1,KLKB1,F11,PLG	APOE,KNG1,MST1,APOA4,C6,KLKB1,APOC1,APOA1,TTPAL,CPB1,CREG1,RBP4,RPS13,CDC37,FAM111B,ACTR2,HDAC4,AFM,EMILIN1,LSM4,RPS27A,OSBPL9,APOC4-APOC2,ZRANB2,CFH,C8G,APOA2,MSL3,F11,WIZ,PSMA1,POLR2J,APOL1,GC,HRG,MAP7D3,CLEC3B,SERPINC1,NDUFAB1,SRSF9,TRRAP,HPR,CFHR1,PRG4,UNC45A,APOF,POLR2F,APOC3,RPL4,MRPL43,POLR3D,TRIP12,CRTAC1,METTL5,NOP9,PLG,UBAP2,DENND2D,C4BPB,NUP93,FXN,PRPF4B,PDCL,DYNC1H1,VPS13D,SH3GLB1,PPP…
0.00364058289939207	COPS6,ANAPC1,ANAPC5	YBX3,HAUS3,PCNP,RPL23A,MAP2K5,MAP4,ORC4,NAP1L1,TXNRD3,LIN54,MZT1,ATP6AP2,ELOF1,NOA1,COPS6,DNPH1,MAX,FBXO22,VPS50,MAP2,RAB11FIP1,PIAS1,CNOT7,CELSR1,MED24,NELFA,WRAP53,PYDC1,ARID4B,GCSH,ANKRD13D,C19orf47,UBE2K,CDH11,CNOT6L,C9orf64,UBQLN1,ANAPC1,UNC119B,INTS10,LUZP1,SZRD1,NXT1,PSMD1,SEC24A,HP1BP3,LRPAP1,DHCR24,ZFYVE1,KSR1,RPSA,QTRT2,ENO3,YME1L1,CFAP20,PARD6B,RPL13,ANAPC5,GIGYF1,ANGEL2,SRP9,EMG1,LSM5…
0.000241104999526404	KNG1,KLKB1,F11,PLG	APOE,KNG1,MST1,APOA4,C6,KLKB1,APOC1,APOA1,TTPAL,CPB1,CREG1,RBP4,RPS13,CDC37,FAM111B,ACTR2,HDAC4,AFM,EMILIN1,LSM4,RPS27A,OSBPL9,APOC4-APOC2,ZRANB2,CFH,C8G,APOA2,MSL3,F11,WIZ,PSMA1,POLR2J,APOL1,GC,HRG,MAP7D3,CLEC3B,SERPINC1,NDUFAB1,SRSF9,TRRAP,HPR,CFHR1,PRG4,UNC45A,APOF,POLR2F,APOC3,RPL4,MRPL43,POLR3D,TRIP12,CRTAC1,METTL5,NOP9,PLG,UBAP2,DENND2D,C4BPB,NUP93,FXN,PRPF4B,PDCL,DYNC1H1,VPS13D,SH3GLB1,PPP…
0.00084511155906837	DDX24,FTSJ3,EBNA1BP2,WDR46,RPL10A	NAT10,DDX24,RRP12,FTSJ3,EBNA1BP2,WDR46,VAPB,SDAD1,APIP,NTN4,CFD,SNCA,MTX1,EXD2,EPCAM,PTPN1,RPL10A,PSMD3,ACAT1,ATP2C1,C1orf35,RGCC,SMG8,SMYD5,PCCB,AKR1B1,STON1,NEK7,SLC25A1,LIN9,WDR45,CAMSAP1,RPL23A,TCIRG1,RPL7,RBM25,SRP72,FBXO6,RAB9A,TBL2,RPN1,TOP1,ARAF,TMED3,DDB2,IFI44L,PPIL3,RPL32,MAGI1,APOL3,CHD2,LSR,MCM3,DHX36,ATP9A,NSDHL,CXCL12,TEX264,MCU,POLR3A,AQR,RIOX2,UTP20,AGPAT3,NSA2,UBE2O,LTBP4,DEPTOR…
0.000772557373419811	PKP1,KRT17,METTL14,KRT5,KRT14	KRT16,PKP1,TRIM29,NDUFB9,EIF4EBP2,SERPINB5,ANKRD13D,KRT17,FBXW2,ERGIC1,SLC2A1,LAMB3,TOM1L1,GLUD1,AMDHD2,ZMYND11,PPP2R3A,ATF2,EVL,GLCCI1,LAMC2,PTAR1,VBP1,GRHPR,METTL14,FKBP2,KRT6A,RNF135,FNDC3B,ECI2,PAXX,NDUFS1,HSDL2,PRDX3,BCKDK,PDK2,KRT5,NT5DC2,LTBP1,NDUFA1,FGD3,SPINT2,ECT2,DEPTOR,MAPK9,SEC13,SNX21,TM9SF4,UGDH,KIF11,RTKN,CD81,EPS8,C4BPA,ECHDC2,IFT122,PDAP1,MTX3,LAD1,ACADS,COA5,PARD3,AGRN,FBXO11,Z…
0.00599116833074609	KRT14,KRT17,KRT5,PKP1	KRT14,AKT1S1,INTS7,MYCBP,XPO7,KPNA1,NDUFS4,ATP5I,VAPB,KRT17,KARS,HSPH1,HINT2,PACS1,MYH14,MISP,AGRN,SMAP1,POGZ,SUPT4H1,GCN1,VPS35,ATG12,RGCC,DUS2,GTF2I,KRT5,CTSS,ATP8B1,AP2S1,CCDC127,TSN,TRIP6,RTKN,TECPR2,ATAD2,PYDC1,EIF3C,COX20,CPNE3,LAMC2,MYBBP1A,FBXO42,EXOSC5,UHRF1,PPP2R3A,PSTPIP1,MED20,CPZ,DYNLL1,RRP7A,RASAL3,FANCI,GPSM1,ELOC,PKP1,C11orf84,INTS4,PCID2,FUCA2,PLAA,PDK1,ALKBH4,CTU2,PRKAG1,ENG,ECM…
0.00599116833074609	KRT14,WTAP,MEPCE,KRT17	KRT14,TRNAU1AP,NCOR2,NDUFA11,KLF16,FGGY,ZC3HAV1,RNF113A,GLCCI1,ATRX,ANXA5,TG,PDZRN3,ARID1A,PANK4,AGA,WTAP,PCBD1,GATAD2A,MED10,SAP130,RABGAP1L,RSRC2,TBL3,ISG20L2,CYB5R2,SELENBP1,PDXK,PNN,UHRF1BP1,ANXA4,CC2D1B,SMG8,PYGL,CRIPT,CDC42,RPIA,NDUFA13,SRFBP1,NSRP1,TTC30A,LTBP2,EPM2AIP1,MEPCE,MAEA,INTS12,RBM14,RPS16,SERPINB5,RECQL,CTU2,FBXO11,NAPG,NDUFAF5,KRT17,C11orf84,WDR12,ZNF787,SERBP1,FOSL2,ELL,NFKBIB…
0.00413186527199045	INPPL1,ITGA4,KRT17,AP2M1	DPP8,SDCCAG8,SLC16A3,TSC1,MIB1,ARF1,SHKBP1,TM9SF2,HCK,SUGP2,ZNF598,NT5E,NLRP2,MAPRE3,PON1,UBE2I,PEF1,PGLS,MYL6,PPP1CB,PRIM1,IFI16,SOS1,ATP6V1F,LRP1,KCTD15,POLR3D,BCAM,BCAT2,SUCLG2,SORBS1,CLTB,KLC4,USP33,ITGB4,PRPF6,ALG5,SEPHS1,CCDC50,TPM4,CTHRC1,CLIP2,UFSP2,ACBD3,CSAD,ROGDI,KLHDC2,METTL7A,ARID1A,INPPL1,BUD23,PYCR2,ZNF687,UBE2H,RNF214,TYW5,ALDH1A3,KLHL42,GNAS,GSTO1,LPIN1,KRR1,GRPEL1,ZC3H18,ATAD2,C…
0.000477117998289751	KRT16,KRT17,METTL14,KRT5,EGFR	KRT16,PKP1,TRIM29,NDUFB9,EIF4EBP2,SERPINB5,ANKRD13D,KRT17,FBXW2,ERGIC1,SLC2A1,LAMB3,TOM1L1,GLUD1,AMDHD2,ZMYND11,PPP2R3A,ATF2,EVL,GLCCI1,LAMC2,PTAR1,VBP1,GRHPR,METTL14,FKBP2,KRT6A,RNF135,FNDC3B,ECI2,PAXX,NDUFS1,HSDL2,PRDX3,BCKDK,PDK2,KRT5,NT5DC2,LTBP1,NDUFA1,FGD3,SPINT2,ECT2,DEPTOR,MAPK9,SEC13,SNX21,TM9SF4,UGDH,KIF11,RTKN,CD81,EPS8,C4BPA,ECHDC2,IFT122,PDAP1,MTX3,LAD1,ACADS,COA5,PARD3,AGRN,FBXO11,Z…
0.00159005056443491	HIST1H2BB,KRT18,CDC5L,BBS7,ARMC8,KRT5	SLC9A3R2,PJA2,KRT19,LACC1,TACC3,BCL2L1,ARHGAP35,TPX2,GOLIM4,PTPRA,RFK,EEA1,GANC,HIST1H2BB,MRPL45,NDUFAB1,HMGB3,FER,ATP1B3,GLRX3,AGPAT1,KIAA0368,DCK,WDR19,ZNF706,FEM1B,PHF2,VPS13D,PTBP3,HSPD1,MBOAT7,UEVLD,IDH2,NCOA1,NFKBIE,POLR3F,RGL2,HK3,NEDD4,RPLP0,USP18,NSUN2,UBE2Q1,MSH6,VCP,COL1A1,RPS6KA4,CD3EAP,UQCR11,AP2M1,KRT18,MLPH,PLEKHG3,GPS1,PRKD2,PHLDB1,VWF,NOL9,PRTFDC1,TP53RK,CDC5L,ZNF609,CEP44,PBX1,B…
0.00159005056443491	KRT18,KRT8,EXOC8,YWHAQ,YTHDC1,METTL3	KRT18,KRT8,NR2F2,KRT19,RABEP1,TJP3,USP47,PTPN23,RUFY2,PAICS,STC2,STUB1,POLR2F,SEPT3,PDIA3,SCUBE2,MYH14,EXOC8,RABGEF1,DPCD,EXOC1,DYSF,IKBKB,ZNF148,RHOC,IFT43,CENPF,GOSR1,SSH3,KANSL2,FAM129B,TAF1,EPS8L1,SRSF1,LGALSL,TMED10,PRPF31,THEMIS2,PIP4K2C,AHCY,ALYREF,ACO2,CAPRIN1,TUFT1,SPAST,SPTLC2,IGLL5,CARTPT,YWHAQ,KRT7,SF3B6,UBE2M,MESD,PPP3CA,C1orf226,CSNK1A1,NSD2,MGRN1,ING3,THUMPD2,DNMT3A,CAMK2G,CPB1,UBL…
0.00159005056443491	KRT18,KRT8,PDE4DIP,SEC16A,EGFR,HIST1H2BB	KRT18,KRT8,SSH3,PDE4DIP,SLC9A3R2,PTBP2,DOCK1,SOS1,ANXA9,HEXA,MCFD2,BAG1,GBP5,TEFM,PDPK1,CROT,SEMA3C,DNAJC1,HERC5,BIRC2,GHDC,KRT19,RCN1,PEF1,MLPH,USP8,ADIRF,SEC16A,LAMA2,PPA2,ADGRL2,TAF8,SPICE1,WASL,FMN1,TTC37,NUDT16L1,GFPT1,GMPR2,VIRMA,EGFR,COL6A3,APBB1,TIMP2,NDUFB5,HIST1H2BB,CCNT1,PMM2,UCHL3,XAB2,CLASP2,TTLL12,RRAGA,KAT8,BLNK,C14orf2,SRM,KRT10,RPL35A,DTWD2,BZW1,ATAD2B,NARFL,C19orf53,PNO1,NEURL4,…
0.00519169714645069	UCHL5,PNN,VCAM1,HGS	PPIA,ARGLU1,ZNF330,INTS12,NUDT16,PCNP,YBX1,MESD,NDUFA11,MRPL42,UCHL5,BLOC1S5,MARK2,ELOA,WRAP53,CCDC86,SUMO1,MARK3,RPL35A,WDR61,PNN,SUMO3,DCP1A,CCDC9,ARL2,NDE1,NOLC1,BPI,FNBP4,DNAJC8,TARBP2,XRCC1,MED6,RCSD1,SPOUT1,BOD1L1,ILF2,RPA3,TPRKB,CSN2,SPIN1,EIF3C,RPL34,C19orf53,GLRX,SAFB,MARCKS,ACIN1,RPL28,CWC22,HSD17B10,ZNF787,THRAP3,SRRT,KXD1,HAUS3,TOR1AIP2,VCAM1,CLCC1,NAPA,CBLB,ZC2HC1A,COL16A1,RBBP6,TRIR…
0.00519169714645069	KRT19,PNN,EXOC8,USP32	KRT19,SARNP,PNN,PPP1R11,RSRC2,TIMM9,SDE2,RPS11,SNW1,HNRNPDL,SMC1A,SAP130,DCTN3,SRP68,KAT8,BUD13,MAN1A1,ARID1A,MARK2,RBM33,MSRB3,TDRD3,SEPT9,UBL5,EXOC8,C6orf132,ZFP91,RPL31,TPRKB,PHF5A,ARID1B,RBBP6,COMMD3-BMI1,PPP1R2,RPS6KC1,SGTA,RBM26,NDUFA7,CBLL1,GNPTG,TTR,DAZAP1,SAP30,KLF16,SUFU,EIF3C,IK,NOA1,NDUFS3,RBM14,ZRANB2,DNAJC7,CCDC12,FUBP1,LMNA,ALAD,RNGTT,SLC25A24,RAD50,SPECC1,RPL18A,SPTLC2,FDXR,GGCT,N…
0.00519169714645069	KRT19,EXOC8,PNN,HGS	KRT19,CLEC3A,SARNP,EXOC8,SRP68,KLHL11,SAP30L,PNN,SEPT9,RBM14,POLR2M,AP5Z1,CSN2,SNW1,SMC1A,RSRC2,MARK2,SUMO2,TSSC4,ATXN2,PDS5B,COL16A1,USP8,ZRSR2,DPCD,CNP,GIT2,RPS27L,PTPN11,KLF16,S100A16,NDUFA7,LMNA,ARL6IP1,EEA1,CHKA,DCTN3,HGS,PPP1R11,RABGAP1,PYM1,ZFP91,PRPF6,EIPR1,SDE2,SPC25,LONP2,PHF8,RANBP2,ZFYVE1,TNFAIP2,TFB1M,PLEC,NDUFAF3,PPM1G,SELENOH,TTR,ZC3H14,TSC22D4,C11orf54,S100A14,WAPL,NF1,HUWE1,PTPA,…
0.00201808204555335	KRT5,KRT17,WTAP,UBASH3B,SUMO2	KRT5,TRIM29,CHGB,RPS11,RPL28,SCGN,HGS,MSN,HID1,TPRKB,KRT6B,TXN2,RMDN3,EFHD2,SLC25A4,TIMM9,RPS21,C1QC,SH3BGRL,LAMC2,TG,RPS29,CBR4,RPS15A,GATAD2B,ASNA1,CALD1,PPP1R12A,CD59,GUF1,LUZP1,DDT,RPL18A,WDR45B,FAHD1,HSDL2,UBL5,CCDC50,OSGEP,PPIL1,ENPP1,SMC1A,KRT17,HOMER3,ZNF787,TRIP10,SARNP,GRSF1,MFAP2,SUFU,LAMB3,RMND1,SERPINB5,PKP1,TBCA,TPX2,PCK2,ATRX,EXOC1,RBM14,CDC42,AP1B1,PTPRK,SETX,FOXK1,WEE1,SUCLG1,WTA…
0.00296090371111185	HGS,ITGA4,CHD4,CUL1	BOD1L1,THRAP3,SERBP1,ZC3H4,BCLAF1,NUDT16,PRRC2C,PCNP,PNISR,SLU7,PNN,RBM14,PRRC2A,PPIL1,MAEA,BRPF1,MFAP1,ZC3H13,UBAP1,ZFAND6,AP5B1,ATP5D,BUD13,MARK2,SRRT,NDUFV2,HMGB2,GID8,NDUFA11,USF2,ZNF787,MARCKS,ELOA,CCDC9,ACTA1,HGS,SUMO3,C19orf70,CREB1,ZNF24,SETD2,RBMXL1,SP3,ZNF460,NFYA,SRFBP1,CHMP1A,SLC3A2,CST3,WWP1,IDNK,KRT16,POLR2I,NHSL1,DIMT1,AHCYL1,DUSP12,AHCTF1,NCS1,MED26,THSD4,POF1B,GTF3C2,IL6ST,TPR,KA…
0.000222514128652638	KRT18,PNN,MEPCE,KRT8,ITGA4,RMND5A	PYM1,SAP30L,PRTN3,KRT18,VEZF1,PNN,ELANE,RABEP2,RETN,ARID1A,POLR2E,MEPCE,IMMT,ELOC,CSTF2,CLCC1,RSRC2,SON,SMC1A,KRT8,MED29,BAD,SNAP29,ACTA1,PDCD6IP,GLMN,NDUFA7,MARK2,ACTL6A,TRIOBP,CHMP2A,RPLP1,UACA,LIMA1,ZFP91,THUMPD2,DCAF11,PPIL1,BCLAF1,ARL6IP1,SPRYD3,ITGA4,PCNP,GPX1,TG,UVRAG,CAPZA1,BRPF1,PIP4K2C,KDM2A,RCOR1,RPL35A,ZFAND6,SKP1,DIABLO,PADI4,MTHFD1L,PDIA6,LAMTOR4,PRMT9,EXOC1,GFER,RBMX,SMARCC2,LPIN1,…
0.000288660430199459	RRAGC,LAMTOR1,LIMK1,CCDC90B	BPTF,CHD4,DBNL,UBTF,ARL6IP1,ABCB7,C19orf47,RAB10,MCTS1,RPL19,M6PR,DNMT1,MYL12A,USP36,BPIFB1,GOLGB1,INSR,TBC1D10B,RPL28,STX18,ALDH1L1,TERF2,CLEC3A,INO80C,RNASEH2B,CHGB,METTL5,DMD,HERC2,NFXL1,SPINT2,AUP1,NACA,GPATCH8,DDB1,ERLIN2,MYBBP1A,SURF6,RAB1A,HSPA8,LAMA4,IGF2,SPG7,KCTD9,SUFU,PPM1G,HDGFL2,PEX5,RPL23A,IK,THOC2,ATP5B,RRAGC,COX6B1,GRK6,PDS5B,RPL18A,ZC3H12A,MMP19,DNAJB4,SNX9,SDS,AMPH,ZFR,SPCS2,KDS…
0.00414337126977096	EEF1A1,LAMTOR4,ABCF3	EEF1A1,SAR1A,CD2AP,NDUFS3,CYB5R1,NOSTRIN,PANK2,CLIC6,KCTD10,WARS2,MKRN1,SELENOH,TNC,SPATA5,GMPR2,PHB,KRR1,THEM4,FAH,SLC27A3,RBBP7,ELP5,IRF3,FAM213B,PCBP2,BUD23,AUH,ADK,ATP6V1F,CELSR2,HNRNPDL,NAXE,TMEM214,HAUS6,PGLS,ARID1A,COPS5,PTER,PITPNM1,SEPHS1,OAS3,DOCK1,DENND2D,CLEC3A,ZNHIT2,IFIT3,CLTA,NFYC,RER1,GALK1,TOP1,PCF11,C7orf55-LUC7L2,IGFBP5,DOCK8,SLC3A2,LAS1L,PTBP1,ORC4,SMIM12,DCTN5,BRMS1,MSRB2,F13…
0.00713139578957395	ZC3HAV1,CUL4B,CSNK1A1,EIF3C,STRBP,LARP7	PNN,SARNP,RBM14,GATAD2B,PHF5A,RPS11,FCER1G,PTBP1,MARK2,ZC3H11A,NDUFA7,CWC22,RPS26,PPIL1,RSRC2,RPL18A,BPIFB1,RPL32,CARTPT,LSM6,CDKN2AIP,MED21,TXLNA,ZC3HAV1,MRPS15,ZBTB7B,CTDSPL2,ASNA1,RPS20,ZC3H14,SUMO1,RPL35A,PYGL,SAMD1,AKAP13,EEA1,SON,RPS27L,HADHB,SNW1,IRS2,MAIP1,XPA,CUL4B,INTS12,COPS7B,CMC4,SEPT2,CSNK1A1,BUD31,GGT5,COA6,SP100,SLC4A1AP,IGFBP4,UTP6,HNRNPUL1,HIBCH,PMPCA,IRF9,ARFIP1,CAPZA2,DNMT1,ES…
0.00713139578957395	NFX1,RPS5,EIF3A,MLST8,ZC3HAV1,CSNK1A1	RBBP6,RPL35A,PTBP1,MFAP1,PNN,SMC1A,NFX1,ZNF787,BOD1L1,GATAD2B,PRRC2C,RPL32,TCOF1,C19orf47,SETX,ISY1,SZRD1,MRPS10,MED8,RPL28,CNBP,ATP5B,ZC2HC1A,INTS12,CXXC1,CNOT7,C19orf53,RREB1,DDB1,UFM1,TG,NCBP3,NFYA,ELOA,HDDC3,BPTF,THRAP3,PDS5A,SNW1,SRSF3,PPM1G,CHMP2B,MBD1,PPP1CA,TMEM189-UBE2V1,VWA8,LPCAT2,EMC1,KDM4A,RAB1A,BPIFB1,MYH11,KRAS,YTHDC1,SRP68,RPS5,ARHGEF1,HCCS,POLR2B,SAFB2,EIF3A,CBX4,MTMR6,STX17,POLR…
0.00154685470594149	EIF3A,SNRNP70,CUL3,ZC3HAV1,RPS10,EZH2,CUL5	GATAD2B,ZFP91,SUMO3,PNN,SRSF3,MARK2,ZC3H18,PPHLN1,RBMX,ATXN2L,EIF3A,NDUFA7,BOD1L1,CLTB,ISY1,ZNF787,FAM192A,EIF2S3,PRRC2C,SMAD5,DPH5,SLTM,SARNP,UBQLN1,YBX1,NFYA,HPCAL1,SRRT,MARCKS,HDDC3,ACTB,SERBP1,TBCA,SPRYD3,HGS,CTCF,GABPB1,SRSF2,ACTBL2,EPCAM,YTHDC1,BRPF1,RAB10,SNRNP70,BCAP31,CUL3,CLTA,IDNK,RPL26,STX5,RIPOR1,CHCHD3,ZC3HAV1,LALBA,COA6,ZC2HC1A,BRCC3,ENO2,PSMD9,ARHGEF10,TRIR,SRSF7,YWHAH,TIMM29,ZC3H…
0.00713139578957395	HNRNPDL,RPS18,RPS29,EIF3C,EIF3A,RPS5	RPS11,GATAD2B,LBH,EIF2S3,NDUFA5,PHF5A,DNAJC8,RPS15A,RBM14,SP3,THRAP3,RBMX,PPP2R5B,SZRD1,CLTB,SRFBP1,HNRNPDL,SUMO2,BUD13,CDKN2AIP,RPS18,RPS21,PPHLN1,SUMO3,CMC4,GRN,RPL28,FCER1G,HDDC3,RPS29,ARL6IP1,ISY1,RTF1,RPS19,ELL,HPS3,RSRC2,SMC1A,LSM5,RPL32,TANK,IK,TBPL1,HGS,YIPF5,LSM6,NUBP1,MRPS18A,ADO,EIF3C,MYL12A,DBNL,EIF4EBP1,ARF4,PPIL1,SLU7,SRRT,ZNF787,RBMXL1,RPS6KC1,RUFY1,RPL18A,EIF3A,BBS1,ESD,PTBP1,WDR4…
9.4146805950582e-06	SNRNP70,LARP7,LARP1B,LUC7L2,TRA2A	VAPB,TMEM11,ELMOD2,MRPS12,MAGED1,RBBP6,RRP9,ALDH1L1,MTR,CSF1R,VCAM1,GOLGB1,SNRNP70,ABCF3,ZFAND3,SOD3,LARP7,UQCRQ,ERAP2,ZC3H15,TNFAIP8L2,LARP1B,G3BP2,NUDT14,ILKAP,NFXL1,TMED9,LTF,YBX1,YY1,NOL4L,CLCN7,CUTC,C19orf53,SULT1A3,RAB1A,MFAP1,PPP2R5B,CPB1,ZNF579,INTS1,GLRX,MTX1,RPL12,PLPBP,FAM136A,HTATSF1,EPCAM,LMAN2,GRPEL1,TOMM5,APC,AHSG,GPX3,BET1,SRSF7,LAMA4,PNISR,SYNM,SP3,C19orf47,CTCF,MAIP1,NUDC,JCHAIN…
0.00013495448487766	GATAD2B,SMC1A,RPS26,EIF3A,SERBP1,ATXN2L,RBM14,TCOF1,UBTF,RPS18,ACTBL2,NOLC1,THRAP3,HNRNPDL,CTCF,HSPD1,H2AFV,ZC3HAV1,SRSF2,MRPS26,EIF1AX,EEF1A1,RPS11	GATAD2B,ZFP91,PNN,SRSF3,BOD1L1,SRRT,ISY1,MARK2,SMC1A,RPS26,HDDC3,TBCA,PRRC2C,SUMO3,PPIL1,CWC22,EIF3A,SLTM,ZC3H4,ARID1A,SERBP1,SARNP,ATXN2L,RBM14,RBM33,TCOF1,SETD2,UBTF,UBQLN1,RPS18,DNAJC8,MRPS12,LRG1,VPS25,CENPB,ALDH1L1,ACTBL2,YTHDC1,PPHLN1,SLC4A2,MFAP4,NOLC1,ZDHHC5,CSF1R,THRAP3,CENPC,EPS15,ZC3H18,HNRNPDL,HSPB11,TTC5,GPX3,SNF8,EZH2,STX5,PRKAB2,SERPINA7,APCS,SSFA2,MST1,FCN3,DES,AKR1C3,GATM,MFAP1,C…
6.10362709615096e-05	RBM14,EIF3A,RPS26,RPS11,GATAD2B,LARP7,SMC1A,SRSF7,MEPCE,TCOF1,NOLC1,PCBP1,ZC3HAV1,CTCF,SERBP1,CDK2,RPL32,RPS27A,AIMP2,PRPF19,RPL29,PCMT1,ACTB,NONO	ZFP91,SRRT,PNN,GATAD2A,SMAD5,RBM14,SRSF3,EIF3A,RPS26,RPS11,CCDC9,ACIN1,GATAD2B,RBM6,INTS12,YLPM1,LARP7,ZC3H18,SMC1A,HGS,BOD1L1,PRRC2C,CDKN2AIP,SRSF7,PCNP,CIZ1,BLOC1S5,RABGAP1L,SUMO3,ZC3H13,UBL5,MAEA,MEPCE,TCOF1,SBSPON,NOLC1,PCBP1,REEP4,NPTN,ABI3BP,SLTM,ZC3HAV1,CTCF,USP10,FAM76B,SERBP1,SNX33,BUD23,EPS15,ZNF787,CDK2,GPX1,A2M,RETREG3,RAI1,TRAPPC2,OXSM,CUL4B,ANKHD1,HS1BP3,ADD3,ITIH3,DNAJB6,POGZ,PRG4,…
0.00639584561714724	GATAD2B,SMC1A,RPS26,ATXN2L,CLTB,RPS18,YBX1,SERBP1,RPL32,RPS11,RPS20,RPS29,NOLC1,CTCF,RPS19,TCOF1,MRPS15,EIF1B,ACTBL2	GATAD2B,TBCA,SRRT,PNN,SMC1A,RPS26,ZFP91,ATXN2L,CLTB,SRSF3,MAEA,CDKN2AIP,RPS18,SUMO3,PRRC2C,YBX1,SERBP1,RPL32,PCNP,PPP1R12C,PPP1R11,NDUFA7,ZNF787,ASNA1,YLPM1,TMEM263,NUTF2,ARID1A,RPS11,RPS20,SMAD5,CHMP1A,RPS29,NOLC1,PDZK1,WDR33,DSCR3,CTCF,RRAGC,SEPT2,BCLAF1,ZFAND3,RPS19,CHCHD3,TCOF1,ZC3H14,CNOT11,MUC2,RETREG3,ZBTB14,AMBP,CSN2,TBC1D10B,BOD1L1,MRPS15,CUL3,ZC3H18,EIF1B,GNG5,BPTF,ZNF609,TNIP2,UQCRB,TH…
6.10362709615096e-05	GATAD2B,RPS26,ATXN2L,CLTB,RPS29,RBM14,YBX1,MRPS18A,RPS18,RPL32,LARP7,PCBP1,ACTA1,MYBBP1A,RBMX,NOLC1,CHD2,RRP9,SNRPA,PSMB2,ZC3HAV1,SRSF2,SMARCC1,ALYREF	GATAD2B,PNN,RPS26,SRRT,ZFP91,HDDC3,ATXN2L,SLTM,ARID1A,CLTB,RPS29,RBM14,YLPM1,YBX1,PRRC2C,PCNP,MRPS18A,RPS18,SETD2,DDA1,LBH,RSRC2,RPL32,ZNF24,SUMO3,BRD1,LARP7,PCBP1,ZNF787,EPS15,SMARCA4,EEA1,MRPS12,ACTA1,GPX1,HGS,RBBP6,SETX,TLN2,COX5B,MYBBP1A,SAP18,RBMX,EZH2,NOLC1,FAM192A,COA6,REPIN1,PLIN4,DDX39B,RTFDC1,ITIH5,CRYAB,ZC2HC1A,CHD2,MIF4GD,SMARCB1,EDF1,RRP9,TANK,CAVIN3,ZBTB14,CSF1R,GNG5,WDR33,SNRPA,SNX…
0.00228524138228387	PRPF6,EIF1B,PSMB3,RPSA,RPL32,RPL35A,ATP5B,TCOF1,EIF3C,LARP7,RPS27L,RPL7A,RPS29,HNRNPA1,THRAP3,BUD13,RPL13A,HADHB,NOLC1,CENPV	PNN,ZNF787,MARK2,RBBP6,PTBP1,SARNP,RTF1,PRPF6,EIF1B,SRRT,ANAPC4,PSMB3,RPSA,RPL32,HGS,RPL35A,ZNF638,ATP5B,TCOF1,EIF3C,BRD1,ARID1A,SH3PXD2A,UBL5,RBM12B,CLCN7,AK3,NDUFA7,LARP7,RABGAP1L,RPS27L,UBE2V2,SLC12A7,RPL7A,SH3GLB1,TNIP1,ILVBL,RPS29,APOC3,MATR3,RBP4,ATP6V1G1,ANXA5,GPT,TNPO3,LIMCH1,HNRNPA1,ADI1,GRAMD1A,TMEM189-UBE2V1,ARPC1A,RAE1,H3F3A,COX5B,THRAP3,MTX3,SMAD1,POLR2M,STAT6,PJA2,CMA1,PPP1R10,EIF4G…
0.00967944465432822	CHD4,LAS1L,FOXA1	CHD4,RBM25,PDS5A,LAS1L,PPM1G,EIF5B,SF3B1,MARCKSL1,DCAF13,MEPCE,PES1,EXOSC10,EIF4G1,ARID1A,GATAD2A,SMARCA4,RABGAP1,HPGDS,NUP93,DNMT1,SYMPK,EPS8,GPATCH4,PRPF6,ARF3,CUL4B,ZC3H4,POLR1E,ZNF598,SART1,PRCC,SON,SPR,RBM10,ZCCHC6,ZC3H8,KNOP1,LARP4B,ZC3HAV1,RPS29,MRPS15,U2SURP,SH3BGRL2,PRCP,RRP1,NCSTN,TPP1,MFN1,YBX1,PLRG1,TF,THOC2,MPHOSPH8,RBBP6,SEMA3C,TBC1D17,NUB1,PSME1,NAA15,AGT,REXO4,RPS25,UBR1,WDR35,MLK…
0.00224852739168142	POGZ,CCT4,TUBA1C,GRN	PPIL1,SP3,MIS12,ALDH1A1,ARHGEF7,TARBP2,ZFR,CYR61,POGZ,SLC2A1,RPL22,YLPM1,MRPS24,RBL2,ATG4B,MBOAT7,GTF3C6,SRSF3,UEVLD,SURF6,UFSP2,GHDC,GRWD1,RBM14,CWC25,TMEM70,TRAPPC4,PPP1R12C,SNX17,ANTXR1,CBX3,ABHD14B,GRPEL1,CYBB,DBNL,PHC3,HECTD3,NUDT19,CDC42EP5,RPL29,TFIP11,CCDC86,ZC3H18,CHMP4A,HCK,FBXO22,NDUFA11,CAPN15,GSE1,ETF1,MARCKS,ALOX15B,ZFAND3,OCIAD1,MAP7,BECN1,CCT4,TUBA1C,ARHGAP12,RNF7,CIZ1,RBM33,C15or…
7.25546049939481e-06	LIG1,CUL4A,POLA1,UHRF1,CHTF18	RPS26,ARID1A,PPM1G,PNN,TTR,LIG1,PRPF6,RBBP6,ZNF638,NASP,KIF11,CHD4,EIF3C,NELFB,CTDSPL2,PTMA,MARCKSL1,DDX3X,SARNP,SDE2,FAM192A,SMARCA4,NCAPH,TPR,ORM1,SERPINB6,ZC3H11A,MAEA,ZBTB7B,ALAD,RPL29,RPL32,CDC73,NMRK1,ZC3HAV1,CUL4A,DDX56,KIFC1,ECT2,POLA1,IGLL5,SMC4,POLD3,DDAH2,TLE3,MYO1C,TONSL,UHRF1,GGA3,ARIH1,RNF20,RBM25,SNW1,DENR,TRUB2,EXOSC1,KNTC1,SON,YTHDF3,TSEN34,PARD3,KDM6A,ZFR,SETD1A,PES1,ICA1,MGA,NU…
0.000163259112411074	CHTF18,LIG1,EZH2,UHRF1	PPM1G,PNN,PRPF6,GATAD2A,TTR,NOP14,SARNP,EIF3C,DDX3X,SNW1,ZC3HAV1,KLF16,ILKAP,LSG1,KIF11,NASP,EIF4G1,SMARCA4,SMC4,ATXN2L,CWC22,APOH,ARID1A,SON,HMGB2,PHF5A,MRPS5,TXLNA,POLR2A,FUT11,UTP3,ACIN1,EIF2S3,RPL32,CHTF18,KNOP1,AGT,NKRF,TPR,RNF40,LIG1,CIZ1,CUL4B,RBBP6,IK,CUTA,EZH2,PPP2R5A,BPI,ELANE,YTHDF3,EIF4ENIF1,ARIH1,UBTF,UHRF1,SF3B1,SMG9,PDS5B,PHIP,NCAPH,NUDC,APPL2,CAMP,SIAE,WDR46,CACYBP,WDR82,YWHAE,FUB…
0.000163259112411074	EZH2,UHRF1,LIG1,CUL4A	PNN,PRPF6,RBBP6,SRRT,ARID1A,MRPS18A,SRFBP1,GATAD2B,ATXN2L,INTS12,ATRX,MRPS5,GATAD2A,SMG8,RBM14,SARNP,APOH,ISY1,RALY,PTMA,XRCC1,RALGAPA2,RPS26,ZNF787,FUT11,MARK2,RUFY1,RPL36,RPS27L,RBM5,SNW1,SBSPON,TMA16,COL18A1,EZH2,LYAR,PSMD4,EIF2S1,PAG1,TRIM33,COA6,KIAA0907,LAMC1,PPWD1,DYNLT3,TMEM189-UBE2V1,GTF3C1,ALDH1L1,DHTKD1,NACC1,UHRF1,RBMX,RBM12,FKBP15,NFKB2,TOMM5,MED23,GOLGA3,RBM25,DDX3X,STX10,GEMIN6,LIG…
0.0027516520270888	UHRF1,EZH2,LIG1	PNN,EIF3A,ZNF24,FCHO2,ATXN2L,KIF11,RBBP6,SRSF3,NKRF,ARID1A,PRPF6,SRRT,RRP8,UBAP1,GATAD2B,ZNF787,ZNF638,SMC1A,RPS26,MRPS18A,SLU7,LATS1,NCAPH,COA6,NASP,DNMT1,TAOK1,LYAR,CTTNBP2NL,UHRF1,TIMM23,EZH2,WDHD1,JUP,ME3,SNTB1,CRTAC1,CMC4,BECN1,LIG1,SPG21,PLAT,AUH,DDB2,SELENOW,TRIM36,NCAPG,EIF3C,POLD3,DIS3L2,THBS4,PLEKHA1,PPP2CA,PPP4R2,TXNRD3,TNIP1,GMPR2,LTBP1,IDNK,SCO1,SRP68,CCDC93,DYNLT3,ING3,RBM10,CSAD,CH…
5.58861229027554e-05	LIPE,FABP4,PLIN1	LAMA4,SH3GLB1,LIPE,FABP4,EXD2,HSPB6,CAVIN2,UTRN,PLIN1,LAMB2,ZNF609,NID1,ATP6V1G1,AKR1C2,ALDH1L1,NIN,SCAF4,HNRNPR,CALB2,TRIM47,ELMO1,RPS10,ACAA2,SHB,MGP,MAP4K5,NME1,ETFDH,PLIN4,S100B,TACO1,ARRB2,UQCR11,SRSF4,PALMD,DNAJC12,TADA3,CHD1,GTF3C3,HTATIP2,TNS1,DMTN,HEBP1,ALDH2,ANK1,CD2BP2,TLN2,RAB4B,CD74,SRRM1,PABPC1,ACO1,TSPYL1,KATNAL1,MRPL9,MGLL,THEM6,ACTR10,MID1,NUDC,TBX3,ABCB6,ATPAF2,CDK5,PUM2,HBD,AKR…
5.58861229027554e-05	LIPE,FABP4,PLIN1	LIPE,PYGL,PLIN4,ABHD5,AOC3,AKR1C2,FABP4,VTA1,ACSL1,DOCK9,ACAA2,ALDH2,SMG6,IVNS1ABP,ATXN3,LDHD,PECR,ME1,DOCK11,PDPK1,LIN37,COMMD5,OGDH,TACC1,WDR41,MARC1,ZC3H12A,MORF4L1,PLIN1,FBN1,HDAC1,DCTN3,VPS13B,LAS1L,NR2F6,C12orf45,ISCU,CRYAB,ATP6V1D,GPX8,TRIM2,MTSS1,UIMC1,MED27,ITPKB,TSR2,TRAPPC2,AMBP,PDS5B,TMED10,ATAD1,HLA-A,HS1BP3,NDRG1,LUC7L,RAVER2,METTL7A,PARN,NMT2,DAPK2,CLU,TMEM173,TMX1,MRPS23,EPB41L1,F…
5.58861229027554e-05	LIPE,PLIN1,FABP4	PLIN4,LIPE,PLIN1,AOC3,FABP4,GPD1,HSPB6,TLN2,HLA-DQA1,MFAP5,DHRS3,C2CD5,XDH,MUC2,STEAP4,LSM6,RETN,TRIP6,PDCD6,LAMA4,PAG1,ZBTB20,DCAF10,ABHD5,AKR1C2,GAA,ACTA1,PPP1R18,SH3D19,MAN1B1,LSP1,DOHH,ASAP2,CCL5,CASP8,RWDD1,MGLL,SELENOF,FGL2,CCP110,CYFIP2,FBXO18,FHL1,PNP,GRB2,ELANE,CCDC12,PADI4,ATP5E,UNC119,LONP2,CETN3,SMAD3,SAMD9,RUVBL2,STXBP1,SCP2,SMC1A,CMPK1,RPL11,NFATC1,GPI,SIAE,CPQ,YTHDF1,HSPB1,LUC7L,CA…
0.00295595877741064	FABP4,LIPE	ZC3H8,FABP4,PLIN4,CAVIN1,GPD1,ABHD5,ACADS,NHLRC2,MEF2D,ASAH1,EHD2,RRP1,SURF1,NDUFB9,NDRG3,AMDHD2,CES2,LIPE,DENND4A,PRPF38B,HSPB6,EEF1G,SNF8,SLC4A7,KANSL3,CAPZA2,AIFM2,GIMAP4,MB21D2,SNX21,VPS41,NUBPL,RBM7,CXCL12,ZNF618,IMPA2,OLFML2B,ACSL1,LAMB2,SEC16A,ANXA9,NR2F6,NOVA2,AKT1S1,ITGA3,NCOA6,TRIM38,UXT,SEC23A,TTN,PACSIN3,HNRNPH3,MANF,PRKAA1,ITIH5,ITFG2,TACSTD2,HNRNPD,NOSTRIN,IRAK4,PGM5,COMT,CROT,CTCF,…
0.000686362378220962	NOLC1,THRAP3,RBM26,RCOR1,SVIL,SQSTM1	MARK3,RPL35A,RPS26,C1orf174,BCLAF1,PNN,ZNF787,PHF3,SAFB2,ELOA,SMC1A,NOLC1,ZNF143,SERBP1,THRAP3,YBX1,TRIR,VCAM1,ZFAND3,MARCKS,VASN,FAM192A,YLPM1,PNISR,FBXO28,ZNF638,ZC3H13,ANAPC4,MFAP1,ACTB,LSM3,PRRC2B,DOHH,RREB1,PSMC3,NFX1,RBM26,GPALPP1,SLTM,RCOR1,PTMA,UBL5,NCALD,LUZP1,SENP1,EIF4B,UBQLN1,YTHDC1,CASZ1,PPIA,CCNT2,NDUFS6,SAP18,ACIN1,SLU7,EPS15,RPL22,RAB8A,NOVA2,ZC3H18,NDUFA13,DNAJC3,UBTD2,SVIL,FAS,S…
0.00436947783799964	RBM14,U2AF2,PCMT1,LMNA,SOD1,BYSL,TDP2,YAP1,KRT6A,THRAP3,NUP37,NUP214,RFXANK,SYNE1,DDX23	AMPD2,SARNP,RPS11,UBE2V2,NDUFA5,SUMO2,ZC3HAV1,PHF5A,MFAP2,EIF2S3,NCCRP1,TTC9C,CHMP3,PWP1,WDR11,ZFP36L1,SNRPA,RBM14,RPS20,CMC1,GATAD2B,U2AF2,PCMT1,UQCR11,RPL31,JCHAIN,DPH5,TSSC4,LMNA,POGLUT1,SOD1,NUBP2,JUP,PRR14,SRXN1,KCMF1,C1QC,RNF214,TRMT1L,PPIH,GUF1,MYCBP,CWC15,BYSL,MRPS34,DDX50,RTKN,TDP2,MRPL14,YAP1,C21orf33,KIF2A,ZC3H15,TRIM2,UTP14A,KRT6A,THRAP3,NUP37,DPYSL2,CCDC50,RPL7L1,SP100,NUP214,USP34,S…
0.00436947783799964	SRSF3,RBM6,PCNP,MFAP1,C1QBP,PPIE,KPNA4,STX4,RANBP9,VCP,PCBP1,CFHR5,ITGB1,SLC25A1,RABAC1	SRSF3,CCDC9,NDUFA7,SUMO3,VEZF1,SRRT,MED22,GRN,HSD17B10,SAFB2,NDUFA11,UBAP1,SMAD5,CDKN2AIP,PNN,HGS,SMC1A,PRDX6,BRD4,GABARAP,IRF2,ZC3H18,RBM6,RPS19,CDC73,SETX,STAM,PPCDC,CCDC86,SEPHS1,SRSF7,PCNP,FOSL2,UFM1,CTDSPL2,UBA1,NFATC2IP,RPE,MFAP1,C1QBP,DDB1,C5orf24,COX7A2,GAPDH,ATG101,MZT1,MED9,EIF3M,TRAPPC4,DDA1,PPIE,KPNA4,EEF1A1,USF2,STX4,RANBP9,NDUFV2,CLIP2,NEBL,RRP36,CREBBP,PTBP1,VCP,FPGS,LSM6,PSMG3,COM…
0.00236339308988714	LRBA,INPPL1,EZR	PIP4K2A,RPS6,RFC1,RAB27A,CEP128,TOMM20,RPL8,TRAF2,VASP,BANP,C3orf38,CARHSP1,RPS27A,GGA1,PITPNC1,UBA6,FGGY,CUL1,TBC1D10B,EPB41L4B,RPL3,HAUS8,ERF,LRBA,BMS1,EHMT2,FAM102A,ACSS2,CNTRL,TTPAL,DYNLL2,PIK3R4,CDH1,APAF1,BPIFB1,MED27,CLEC3A,CDC37,DAPK1,UPRT,ZC3HAV1,REXO2,PHYHD1,INPPL1,TRAFD1,GGT5,CASP6,NTN4,DUSP23,H2AFY,CNP,UBE2G1,RPL24,PRKACA,CLTA,COPS3,ABCD3,AGFG1,NPC2,RNF114,CORO7,ISY1,NDUFA6,FAM102B,AP…
0.00656493572270882	LRP2,PLAU,THBS1	SMC1A,PPP1R12C,RBBP6,TG,SCAF8,ISY1,LRP2,GPATCH8,COL12A1,UQCRQ,RPL35A,EIF4B,NDUFA7,SRRT,CBLL1,TRIR,UBA1,SDHB,MARK3,CHAMP1,COL11A1,STAM,RACK1,ACAA1,S100A10,CCDC9,MAP2K4,TCOF1,ZNF787,MARK2,CHMP2A,HGS,CENPB,SNRPE,VEZF1,ACTB,MED22,ACTBL2,ATRX,RPS18,MAX,RSRC2,SP3,XRCC1,HDGFL2,MYL6,PNN,SLAIN2,RPSA,SDE2,DDA1,GLRX2,USF2,YLPM1,RBM6,UBQLN1,GLRX,MTMR14,CAMK2D,ROBO1,MED14,PLAU,TAF7,ARHGEF40,TAGLN2,GP2,RPRD1B,…
0.00317701773122857	LSM14A,HNRNPDL,CSNK2A1	GATAD2B,ZFP91,PNN,RBM14,SUMO3,MARK2,CLTB,RPS26,RPS11,NDUFA7,SRRT,MAEA,PRRC2C,SMC1A,SRSF3,RPS29,TBCA,EIF3A,TCOF1,BOD1L1,ZC3H4,ZNF787,PPP1R12C,TMEM263,BLOC1S5,YLPM1,ZC3H13,BRD4,EZH2,LSM14A,KANSL2,TNRC6B,FEN1,INTS12,CBLL1,COL18A1,RBCK1,BCLAF1,LYVE1,RIN2,HNRNPDL,TACC1,SAP18,API5,SP1,NACC1,RPL35A,DPCD,ARGLU1,USF2,PSMA7,TRIP12,COMMD3,POP1,MED15,POLR2E,EFHD2,MCM5,TMEM189-UBE2V1,HPF1,CDC42BPA,ITPKC,SLK,R…
0.00414337126977096	LSP1,PRKCB,MAPKAPK2	LSP1,LPXN,RENBP,SMNDC1,OSBPL11,SUPT5H,SENP3,LIMD2,APOBR,TTN,ATG3,ACAP2,NOL4L,CFB,WDFY1,RPRD1B,SRP68,SELENBP1,NCKAP1L,HNRNPDL,LCP2,CLSTN2,FYB1,MOB3A,CRLF3,HCLS1,SIPA1,SIAE,SLIT3,FAM207A,IL18,TOP1,XPA,SF3B1,STOML2,SMARCA5,NQO1,PTPN6,THAP12,PAF1,U2SURP,FAM96A,TXNL4A,GRAP2,NAA15,GRB2,ACAP1,PRKCB,IGLL1,ELMO1,NECAP2,RMDN1,CORO1A,NOP14,ORM2,CFH,C19orf53,STEAP4,RALGAPB,CCDC12,AKAP8,VWA1,COL4A1,PSTPIP1,BI…
0.00414337126977096	LSP1,FMNL1,PRKCB	LSP1,ITGAL,LPXN,PTPN6,PTPRC,DOCK10,CTBS,DOCK8,ARHGAP15,FNBP1,FGL2,MYO1F,CORO1C,NIT1,BIN2,DEF6,FMNL1,MICU2,ICA1,MIOS,CNN3,LIN7A,YTHDC2,ITGB2,WIPF1,SEPT1,PTPN7,MFAP2,RHOG,BTK,TRAF3IP3,PPP1R18,PLRG1,OSBPL11,SKAP1,GIMAP4,HLA-DRA,AK1,RAC2,IFI16,GOLGA1,PRKCB,COTL1,CD74,TRIP6,ANKHD1,IRF5,WAS,GTF2B,PSME2,FHL3,PREPL,FMNL3,ACAD9,CORO1A,AMPD3,LYRM7,MICU1,LDLRAP1,BABAM1,METTL15,CSRP2,MOCS2,GREM1,ZBTB7A,PRMT1…
1.17645402782143e-05	ZFP91,PNN,RBBP6,SRRT,SETD2,PHF10,PCBP1,ZRANB2,ZC3H18	ZFP91,GATAD2B,PNN,ISY1,SUMO3,BOD1L1,SMC1A,RBBP6,PRRC2C,EIF3A,SRRT,SRSF3,ZC3H4,TMEM263,SAR1A,MFAP1,POFUT1,NDUFA7,BLOC1S5,SARNP,UBN1,ELOA,RBM6,PCNP,SFPQ,MARK2,CWC22,SETD2,CCDC9,UFM1,CHMP1A,SMAD5,PPP1R12C,COMMD10,MRPS15,SUMO1,PHF10,TBCC,ATP5D,PLPBP,YPEL5,RTFDC1,METTL16,DCTN4,KRT80,CRKL,KIAA1143,IDNK,DNAJB12,MED22,UBL4A,PSMB3,RPL35A,GIT2,BLOC1S1,RHOA,RBCK1,BCAS3,CREG1,SH3BGRL2,LRWD1,HEBP2,CHDH,ZYG11B…
0.00675243113101921	SRRT,RPL22,THRAP3,PPIE,NUTF2,ZC3H14,CSNK2A1	SUMO3,NFX1,HDDC3,RPS18,SRRT,PYM1,ZC3H13,MARK3,GDI1,UQCRQ,CLTB,PGAM1,DCP1A,PPP1R12C,FCER1G,AZI2,RPL22,CHAMP1,GDI2,ZFP91,BPIFB1,KNOP1,CHMP1B,THRAP3,MED6,SF3A3,HGS,PPIE,BRD1,SLU7,ANAPC4,YLPM1,FAM192A,TBC1D10A,SZRD1,TOR1AIP2,PSMB4,POLR3K,PPA1,RBBP6,PPP1R2,TBC1D22A,POLR3H,NUTF2,NHEJ1,NUBP2,PTBP1,ZC3H14,GLMN,BLOC1S5,LTBP2,CCDC124,TPR,TCOF1,HSPA8,MRPS10,SMC3,AAMDC,PRR12,FAM120B,SPOUT1,KMT2D,ZFAND3,SGK3,…
0.00733784765958348	ACTR2,SYNPO,DBN1,SCOC	PML,COMMD6,P4HA2,ANXA4,P4HA1,TAB2,FRMD8,LSP1,CNN2,NDUFB5,CAMK2G,COMP,NHP2,LCMT1,PSMC5,MXRA5,SPAST,PLAU,MAP4K2,ELOB,INF2,PLS3,CPB1,BLOC1S2,RSU1,NNT,CAP1,ZNF385A,RPS6KA3,PPP1R11,ARHGEF2,EMILIN1,STX12,TXNDC9,CNOT2,VASP,PSMA1,P4HB,ELOC,PGM3,PPCS,AP5Z1,YIPF3,SYBU,CAPZB,GNAQ,DNAJC3,LIMK1,RNF214,ANXA7,ACTR2,SYNPO,ARFGAP3,USMG5,EIF5,LRCH3,TRAF6,TOM1,DBN1,CD63,PPIB,IL4I1,F8A1,KLC1,RABL6,TBL1XR1,GSTM1,COX1…
0.00351326567155774	DTNBP1,YBX3,MARK3,PRKCD	WDFY3,TTC28,ARL3,DTNBP1,CWC15,WIZ,STUB1,GDPGP1,WNK1,IFT122,BAG5,AGA,ZMAT2,RBM14,ABHD14B,YBX3,NBR1,MRPL3,SPAG1,TMEM11,CCS,DNAAF2,MAN2B2,KLC3,SERPINB1,RPS27A,DHRS2,PRPF6,FRMD6,FUK,TADA1,E2F4,SPECC1L,INO80C,SCLY,LATS1,CRELD2,ZFYVE21,NCOA1,SFRP2,PYCR2,MARK3,GALC,NCOA5,ATPIF1,PPP4R1,BBS7,MTOR,PCF11,TPR,EZH2,P2RX4,ARF5,FAM168A,BRD7,ACTL8,SDCCAG3,FBXW8,PRKCD,DNPEP,CLGN,INTS2,PDGFRB,ACTB,ZC3H18,STX10,IFT…
0.00351326567155774	MACF1,AGR2,MAPK9,TES	MYBBP1A,ZC3HAV1,PPP4R3B,BYSL,STRADA,EIF3C,CPSF4,SGTA,GATAD2A,SF3B1,EIF4G1,MACF1,MGRN1,TRAPPC5,RAB28,SRP72,EIF5B,CNOT3,TTR,BBS1,THUMPD2,KCMF1,AGR2,INPP4B,BPIFB1,VPS51,RENBP,DSC2,UBR4,DYM,RPL18A,MEN1,RPS21,TAX1BP3,CTNNB1,FAM111A,ZNF638,CAP2,PSMA1,PXK,CHERP,CTR9,PNISR,NKRF,NAT1,ADAM17,RPL10A,GPX3,TMEM173,POLDIP3,PGM5,MAPK9,TNFAIP8L2,TNRC6B,IFT80,GLCCI1,DOCK7,TES,CKAP5,FUCA1,DDX52,INPP1,P4HA1,KANK3,R…
0.000151402293284089	PNN,RBM8A,SON,RPL13A,YBX3,RPL18,SNRPD2,MAGOH,RPS2,DBN1	PNN,RPS18,NUP93,SLU7,CUL1,RBM8A,DUSP3,BUD13,RBM33,HNRNPDL,SON,RBBP6,RNF113A,MYL12A,TEX10,BRD2,RPL23A,RPL13A,ACTA1,SRP68,YBX3,ARL2,RPS26,SAR1A,AGFG1,MARCKS,OTUD4,SCO1,S100A10,DAZAP1,ZRANB2,ATPAF2,SEPT2,FUT11,NOA1,TRIM4,ARID1A,CHMP2B,GATAD2A,NOP14,PHF5A,LAMTOR3,BBS1,RPL18,RPL32,STAM,SURF6,GPATCH4,TBC1D9,MFN1,THOC1,DEK,MRTO4,GLS,SNRPD2,MLPH,RALGPS2,CHERP,DIS3L2,GALNT7,RAPGEF1,MAGOH,DIEXF,API5,HNRNPA…
0.000100930927428303	GPATCH4,NOC2L,RPL30,SURF6,RRP1,CEBPZ	HAUS6,POLR2H,GPATCH4,U2SURP,NOC2L,MCRS1,RRAGC,PLEC,HCFC1,APOA4,DGKQ,SUPT5H,RPL30,KHSRP,SF3B2,TDP2,TNPO3,GOSR1,OFD1,PCM1,PPP2R2D,PQBP1,RNF169,H3F3A,SLC4A1AP,IQGAP2,TRIM29,S100A6,MDC1,RPS16,ARAF,CDH5,PLCB1,RPIA,CDK5RAP3,SRRM2,PALM2-AKAP2,FUS,TOP3B,NFXL1,CFB,MAD2L1,C2,HSPB8,SURF6,EED,OSTF1,USP24,AHSG,SMCHD1,SERPINA7,BTD,UBR2,PLCD1,S100P,MYL12A,CHEK2,CMSS1,AZGP1,MTSS1,PGRMC2,ZW10,CAMSAP3,LARP7,HTATSF…
0.0027516520270888	SERBP1,MAP7D1,DCTN1	RPS26,ZFP91,MARCKS,GID8,GATAD2B,NDUFA7,PNN,MARK2,PTBP1,SUMO3,ARID1A,RSRC2,SMC1A,ZNF787,SERBP1,BOD1L1,ELOA,TPRKB,ACIN1,TBCA,MARK3,MAP7D1,RPS18,RABGAP1L,BUD13,CCDC9,TMEM263,MAEA,ASNA1,HGS,PRRC2C,SMAD5,PCNP,SDE2,TCOF1,THRAP3,INTS12,SETD2,CDKN2AIP,NFYA,DDA1,RBM14,PRPF6,FAM172A,ENDOG,KIF13A,GATM,MBLAC2,NDUFA10,THEM4,ABHD14B,POLDIP3,ZYG11B,IDNK,HCCS,PCYT1A,ZNF451,PLEKHM2,GRPEL2,LANCL2,PREP,SUMO1,SWAP70…
0.00115653185694276	SRSF3,ZNF638,SLTM,HNRNPDL,PTBP1,RBM6,YLPM1,KHDRBS1,GRWD1	MAZ,SRSF3,GATAD2A,PURB,ZNF638,PREP,NSRP1,RPS21,CHMP1B,ZC3H18,SLTM,ARID1A,HNRNPDL,SRSF7,C19orf47,REPIN1,ZNF460,C1orf174,SUMO3,SNW1,CCNT2,PNN,ZNF787,PPP1R2,CEP57,IDS,NPTN,ZNF579,ATXN2L,RRP9,PTBP1,WNK1,YY1,MRPS15,BRD4,EIF3A,TTR,MICALL2,RBM26,RCHY1,FAM192A,MARK3,MED6,ZNF574,RPL22,PTMA,TUBB4A,BASP1,PCBP2,C17orf49,SH3PXD2A,C19orf53,CHMP2B,AFF4,RACK1,ACTBL2,MAEA,PPP1R13B,ZC3HAV1,UBE2B,EDF1,SRRT,ZC3H15,F…
0.00450837536086055	SLTM,SAFB,SAFB2,RBM6,YLPM1,SNRNP70,SNRPA,PPHLN1	ZC3H13,SLTM,SAFB,NOLC1,MRPL30,ARGLU1,ACTBL2,EIF3A,TRIR,RPS10,ZNF330,UBAP1,EIF4B,MRPS18A,TRAPPC4,SAFB2,HDGFL2,EDF1,GABPB1,SP1,ZC3H18,SRSF6,CAPZA2,FBXL8,IFT20,TCOF1,POTEF,RBM6,GABARAP,SRRT,COPB1,NUP155,SFPQ,CBLL1,YLPM1,HTATSF1,SRSF7,TCP11L1,REEP4,PAIP2,SNRNP70,RABGAP1L,C1orf174,HEATR5B,HIST1H3D,TXNRD1,VCAM1,PHF5A,CHAMP1,BRPF1,DCP1A,PRRC2C,BICD2,CAMSAP2,EXOSC6,CRIPT,MMP9,SMC1A,MAP7D1,HBA1,NDRG3,BCAT…
0.000264445621374634	NFX1,RBM6,YLPM1,YBX1,SAFB2,SNRNP70,SUGP2,RBMX,PPHLN1,ALYREF	RAB1A,REPIN1,SP3,USP36,SPEN,NFX1,RAB1B,C19orf53,RBM6,NFXL1,MFAP1,MED8,TIMM29,UBN1,PIAS1,RAB10,WDR33,NOLC1,KLF16,YLPM1,HMGN2,NOL8,CHMP4B,TCOF1,LIN9,BZW2,C1orf174,EPCAM,SNX17,FAM136A,PPP1R12C,YBX1,SAFB2,KMT2C,TRIR,DPM3,MED21,HADHA,SUMO1,GABPB1,HDGFL2,VAT1,GSE1,FUT11,ZFP91,RPL26,NAGLU,ELOA,PRRC2C,RBBP6,VCAM1,BLNK,RPL28,SNRNP70,YTHDF2,PPM1G,UBTF,G3BP1,AIDA,SRRT,NFKBIB,MINK1,SULF1,SUGP2,CHD2,CTCF,INTS…
0.00450837536086055	HNRNPDL,MEPCE,ZNF638,PUM1,RBM14,SUGP2,RUVBL2,SLTM	RAPGEF1,RBM10,ACTA1,HNRNPDL,MEPCE,GRPEL1,RECQL5,SMNDC1,SCO1,NUPL2,SMC4,TRPT1,ZNF638,COA5,PUM1,LEO1,QSOX1,MRPS2,ENO3,MYL6B,MED18,SRBD1,POP4,FAM49B,PLRG1,EHD3,AMDHD2,MGAT1,MRPS24,INPP5K,MRPL51,GSTM5,GPATCH4,COPS3,XAB2,HGH1,PPP2R5B,SPG21,RBM14,WASHC5,NUDC,FAS,WASF2,RAPH1,THAP11,APOH,DNAJC7,USF2,ANAPC1,KDM5C,SIAE,ZNF207,MRPL18,NCBP3,RFC3,TIMP1,MELTF,SUGP2,UTP15,WASHC4,ANAPC2,KDM3B,NHLRC3,EIF3C,SEC24B…
0.00620516902972678	MCM3,MCM6,MCM5,MCM7,CLU,PABPC4,PIP,GMPS,ABCE1,HNRNPC,SLC25A6,HNRNPA2B1,TPP1,LANCL1,CCT8,RPS7,NAA40,ERP44,UBE2M	MCM3,MCM6,CHAF1B,MCM5,GTF2E1,NCAPH,WDHD1,KIF11,GPX3,ROBO1,MCM7,MTMR9,CLU,TACC3,PPIH,KIFC1,SLBP,TBC1D22A,RFC4,EDC3,CHAF1A,PHPT1,PABPC4,PIP,IL6ST,PTPN1,HMOX2,WISP2,GMPS,WWOX,PHACTR2,ABCE1,HNRNPC,DGCR8,SETD7,IGFBP4,SLC25A6,HNRNPA2B1,DHX16,EMC7,TPP1,FAIM,RAPGEF6,LANCL1,SRC,SERPINA3,AGT,PRELP,GALNT1,AGK,VPS13A,TBCE,EXOSC1,CCT8,GBE1,OGFR,TBC1D13,RPS7,NDC1,HDGFL3,SDHA,WDR6,AZI2,PITRM1,TNFAIP8L3,RING1,CM…
5.39317695159613e-06	MCM6,MCM3,MCM7,MCM5,MCM4,PCNA,MCM2,FKBP5,FBXW11	MCM6,MCM3,MCM7,WDHD1,UTP4,NAA15,MCM5,MCM4,CD74,MASTL,RFC4,KIF11,TACC3,PCNA,CHAF1B,CRIP2,POLR1B,UBE2S,PTPN1,UTP18,NOP16,CHAF1A,DOCK1,MYLK,DSTN,PRIM2,LPGAT1,MCM2,SMC2,STAP2,DTNB,POLD3,CUL1,KIFC1,ARHGEF5,TRIP13,PITRM1,STRN3,WFDC2,TOE1,MAMDC2,RFC2,VPS13C,POLA1,CLU,KIAA0907,STMN1,HAUS8,WISP2,SERPINF1,FGF1,RPS7,DPY30,TGFBRAP1,LRP1,YTHDF1,KIF4A,ACBD6,GFPT2,FKBP5,ME3,DNPEP,NLE1,CD3EAP,MAD2L1,HMOX2,CORO7,…
0.000172566342263229	MDC1,SLC4A1AP,U2SURP,CASP3,POLD1,TOPBP1,GTF3C1,RFC4,MICAL3,RNMT,PRKDC,OGT	MDC1,SNRPD2,HSD17B8,SF3B6,SNRPN,EDC3,LSM2,SF1,VPS72,GTF2E1,SLC4A1AP,U2SURP,FOXK1,COL2A1,CASP3,MCM6,IARS,POLD1,CHAF1B,HCFC1,TOPBP1,SUPT4H1,SART1,CDC42,UTP14A,PHACTR2,MORF4L1,METTL1,GTF3C1,SIGIRR,OTUD4,RALB,ZAP70,WRNIP1,RPS3,CELF1,ELOC,RPL5,PRPF31,PIR,SNRPA1,PPP1R14A,SPC24,TAF7,UTP6,RFC4,PPM1B,SPAST,DNAJB4,MED10,RABL6,SLC9A3R1,C1orf52,KIF2A,GSK3B,FAM103A1,ZMYM3,TRIM2,MICAL3,FAM129A,INTS14,RAC1,UBE2…
0.00798794726306432	CDKN2AIP,MYL12A,SFPQ,PHF3,BOD1L1,SERBP1,THRAP3,SETD2,COPE	PPIL1,CDKN2AIP,CCDC93,SAR1A,CCS,HDDC3,CUTA,INTS12,RPS6KC1,ZNF460,RBM33,HGS,GAPDH,MYL12A,ZC3H18,GLCCI1,STXBP1,CDC73,MARK3,TBCA,AMDHD2,SFPQ,ADO,TSC22D2,YBX1,MRPS18A,PPIE,PGGHG,GPX1,HNRNPDL,GRHPR,TUBG1,NPM1,ZNF330,PTBP1,UBA1,RABGAP1L,PHF3,AP3M1,SDCBP,SAP30,PYM1,DIS3L,NAP1L1,RPS18,XPO6,BPTF,ATP5E,HMGB2,KIF3B,BOD1L1,CAMSAP1,CHGB,TMEM263,RPL32,SRRT,NUBP2,CHMP1B,PEBP1,CP,AP5Z1,NFKBIB,LRCH1,LAMTOR3,ASNA1…
0.00246098773941412	ARID1A,CDKN2AIP,SERBP1,MDC1,SFPQ,THRAP3,NBN,HNRNPU,TRIM33,ANAPC5	PRPF6,PNN,ARID1A,SARNP,SNW1,GATAD2A,SNRNP70,MARK2,ATXN2L,EIF3A,SLU7,ZC3HAV1,CDKN2AIP,INTS12,FNBP4,UBAP1,IGLL1,RPS29,UBL5,PHF5A,YLPM1,RBBP6,SLTM,ZFP91,TXLNA,SERBP1,TAB3,BPIFB1,BCLAF1,RPL32,ATRX,CCDC93,ARL6IP1,ZC3H14,EIF1B,LSM3,F13B,ALDH1L1,PELP1,C3,SELENOW,RXRB,MDC1,SFPQ,THRAP3,LSM7,MRPL51,PLPBP,RALB,XAF1,DHX34,RSRC2,NBN,CDC37,HNRNPDL,SMAP1,CLPB,ENPP2,REEP6,SETX,SCAF8,FMN1,PHF10,TADA3,ILKAP,PRDX2,…
0.00246098773941412	THRAP3,SERBP1,SMC1A,SMARCB1,BOD1L1,WRAP53,RPL29,MDC1,KPNB1,BANF1	MARCKS,ZNF638,PRRC2C,PNN,RPS26,ZFAND3,PTBP1,SLU7,TCOF1,ZNF787,THRAP3,UBAP1,ZNF460,ZNF668,SERBP1,SMC1A,ZFP91,PIH1D1,RBBP6,RBM26,CWC22,SRFBP1,SMARCB1,MARK3,EIF3C,MAP3K7,BOD1L1,SAR1A,WRAP53,MAEA,RPL32,GATAD2A,SUMO3,PYM1,SCAF11,YBX3,RPL29,NCBP3,COX17,RPE,RABGAP1L,CAB39,SNRNP70,HNRNPDL,MED22,MDC1,PDCD5,KPNB1,GAB1,STAT3,AKR7A2,USP15,YWHAG,CARHSP1,BYSL,UBE2V2,PKP3,TOP1,COX6B1,CKAP5,NAT10,CLTA,OTULIN,ANK…
0.00798794726306432	SERBP1,THRAP3,WDR33,CREBBP,MDC1,CAPZB,PRKRA,USP13,CDC27	SERBP1,PRRC2C,RBM26,PNN,ATXN2L,EIF3A,SRRT,THRAP3,SNRNP70,ZNF24,RBBP6,RPL32,YBX1,BTD,WDR33,ATG5,SARNP,MARK2,PSMB4,PHF5A,RNF40,ARGLU1,TMEM263,CREBBP,TARBP2,GATAD2A,RPL35A,HGS,NUP43,ELOA,RBM14,NUDT16,RTFDC1,MDC1,SNRPE,CASC3,NUCB1,RBBP4,COG7,LARP4B,CAPN15,NIN,AKT1,SNAP23,MRPL51,SEMA3C,SEPT6,CENPV,MFGE8,F11,METTL26,MYBBP1A,AP3D1,PDCD6IP,EPN1,CFDP1,TWISTNB,WDR20,TRIM4,PPA2,DECR2,CAPZB,PLG,THOC2,CAP1,BR…
0.00798794726306432	BOD1L1,SERBP1,RPL29,COPE,CDKN2AIP,SETD2,NBN,RAD50,ZNF148	NDUFA11,BOD1L1,ZNF787,HGS,HDDC3,MARK2,SRFBP1,SUMO3,TPRKB,TOR1A,UBL5,TMEM263,RCOR1,ELOA,SRRT,EIF3A,PCNP,SAR1A,ZC3H13,ADSL,SERBP1,USF2,GPATCH8,KIAA1143,PRRC2C,RPL29,DNAJC8,LBH,UBQLN1,RBBP6,ZBTB14,MED22,SAFB,NUBP2,CCDC86,TMEM106B,COPE,ACIN1,GID8,CDKN2AIP,UBAP1,RPL26,C5orf24,NUDT16,NOL8,SETD2,GRIP1,REEP4,TRAPPC2,FBXO18,THUMPD3,SCAMP2,NBN,CTPS2,D2HGDH,XRN2,PLXNB2,HSPB11,MGST1,WDTC1,UBTD2,ALCAM,MGRN1,C…
0.000683982211758873	CDKN2AIP,MDC1,ARID1A,COA7,PPP1CA,TRIM33,NDUFA10,PLRG1,PARN,SLC4A1AP,TOPBP1	PNN,GATAD2B,RBM14,LBH,PHF5A,ATXN2L,GATAD2A,SRRT,CDKN2AIP,YBX1,MDC1,TBCA,FCER1G,RPS11,SARNP,ARID1A,RPL32,ZC3H4,EIF2S3,ACTA1,RBMX,RPS5,RRP1,POLDIP3,VPS11,CMC1,HTATSF1,CLIC6,NUP205,RAB1A,PRRC2C,RABEP1,PPIL1,ZNF598,SNRNP70,SNW1,TOP2A,AGTPBP1,COA7,SMC4,PCLAF,SRP68,MBLAC2,DIS3L2,PPP1CA,GTF2F1,PHPT1,SURF6,RPL30,GPATCH4,ZC3H18,MGLL,DNMBP,WASL,MRPS31,UTP18,C4B,ESRP1,RPL12,TRIM33,RPS19,DPH2,POLR2J,POP4,PLC…
0.000128041292253455	CHD4,STK17B,TEX10,MDN1,PELP1	PNN,SERBP1,PRRC2C,ELOA,ABHD14B,MARCKS,YBX1,ZNF787,MRPS15,CORO1C,RPS26,NMRK1,CWC22,DNAJC8,PDS5A,ECM1,TNS1,SERPINA4,C19orf47,SUMO3,EIF3C,PTMA,RBBP6,ATXN2L,RPL32,NOP14,PPIL1,ZC3H14,THRAP3,FNBP4,FCHO2,SF3B1,UTP3,TRRAP,RPL27A,CHD4,MYBBP1A,LRG1,E2F4,SMCHD1,THOC2,RPL17,TNIP1,CNOT1,THBS1,EIF2S1,RPP38,STK17B,PRPF4B,HSPB8,PEA15,NUP85,TEX10,PBK,NUP93,CMC4,BTD,MDN1,SMAD1,ADNP,KRI1,PELP1,ARHGEF37,SMAP2,NOC2L,…
0.000138997017401351	DDX54,RPL17,CENPV,TRMT1L,GTPBP4,ZNF593,RPL3,CAT	RPL19,STX4,ME2,DDX54,FBXO30,OXNAD1,HMG20A,TNN,RPL17,FOXP1,RPL4,NOC3L,CENPV,PYGL,MAVS,APMAP,CUX1,SMARCC1,RPA1,AVEN,ATP5J2-PTCD1,RBCK1,CRTC3,SMOC2,TRMT1L,NSDHL,BAZ1B,SPINT1,GTPBP4,CAPZA2,PSMB7,FAM213A,MPP1,OAS3,NOP14,RRBP1,RCL1,GNB1L,MATN3,ZNF593,PPP5C,PSMD13,NCEH1,XRCC6,EIF3F,TTLL12,GNL1,TRAF6,HMOX1,GOLGA4,RRP12,SMC2,KRT14,IRF5,EPB41,NIF3L1,IMPDH2,CWC27,SAMD4B,USP36,GPRIN3,MRRF,IFITM3,HOPX,RPL7,CR…
0.00103223456650854	MED1,MED20,MED8,MED29,MED22,CDK12	ZFP91,RPS18,GATAD2B,PRRC2C,MARK2,RPL35A,CLTB,PNN,RPL29,ARID1A,PTBP1,TMEM189-UBE2V1,RPS26,RPS29,RPL32,NUDT16,RPS11,PPP1R12C,SMC1A,SERBP1,RPL28,SARNP,CARTPT,BLOC1S5,ISY1,NDUFA7,MAEA,BASP1,SUMO3,DNAJC8,CWC22,ATP5B,ASNA1,TBCA,MARCKS,BPIFB1,RBM14,PCNP,MED1,KANSL2,SRSF2,RBMX,DRAP1,SH3GLB1,RRP12,DOCK9,DHX37,SZRD1,YBX1,MED20,YTHDC1,MED8,ATXN2L,IKBKG,PDCD6IP,NAPG,TIMP1,GGA3,EDF1,CSN2,DLAT,ARHGAP30,TCOF1,L…
0.00014970092002631	MED1,ZC3H13,RALY,MED12,CDK12,RBM5,MED8	SARNP,PNN,MARK2,GATAD2B,ATXN2L,MAEA,ZFP91,SRFBP1,PPIL1,SRRT,PRRC2C,ZC3H4,RBM14,MED1,YBX3,MRPS18A,INTS12,PPP1R12C,ZC3H13,PHF5A,NDUFA7,ASNA1,ZNF24,PPIE,PCNP,TCOF1,MARCKS,RALY,YBX1,MYL9,RBBP6,RPS27L,CNOT11,RPL32,EFHD2,CASC3,RAB1A,PSMD3,SP1,BRD1,COPS7A,CD9,ESD,LSM7,KRAS,CSTF2,RPS18,EXOSC1,RPUSD2,GGA3,MSRB3,VCL,FABP3,MED12,PPP1R10,CDK12,CDC27,PHAX,BCLAF1,ZNF787,PPP1R11,GSPT1,CLIP1,CNOT3,MRPS5,TNS1,C9o…
0.00197643661732051	MFAP1,SERBP1,PCBP1,HSD17B10,RPL26,RPS15A,RPS10,HNRNPDL,RPL29,RPL28,RPS26,YBX1,RPS19,RPS11,ZC3HAV1,CLTA,SRSF7,RPS5	MARCKS,ZFP91,PNN,PRRC2C,GATAD2B,MARK2,PCNP,BOD1L1,ARID1A,MFAP1,THRAP3,SUMO3,SERBP1,ZNF787,TCOF1,RBBP6,MAEA,RBM14,PCBP1,HSD17B10,FNBP4,CWC22,NDUFA11,CHMP1A,UBL5,TMEM11,SAFB,EDF1,C1QC,NOLC1,PPIL1,ZC3H18,ARGLU1,RRP9,RPL26,RPS15A,CXXC1,BCLAF1,ZNF579,YY1,RPS10,MAD1L1,NDUFA7,HNRNPDL,BRPF1,PSMG2,ZMAT2,EXOC1,NOTCH3,RPL29,SDCCAG3,KCTD12,RPL28,CHCHD3,EIF4B,SAFB2,SP3,MCM4,HDDC3,RPS26,COL18A1,YBX1,RPS19,GABA…
0.000376630347368538	RPS29,RPS26,RPS11,GATAD2A,ATP5B,SRSF3,SERBP1,CSNK2A1,CLTA,LARP7,HNRNPA3,RPL35,RPS19,HNRNPA0,NAP1L4,NCL,EIF3A,U2AF1,METTL16,HNRNPDL	PNN,ZFP91,SRRT,GATAD2B,ARID1A,PRRC2C,MAEA,RPS29,MARK2,RPS26,INTS12,YLPM1,PPHLN1,ZC2HC1A,ZNF787,SMC1A,RPS11,GATAD2A,ATXN2L,SMAD5,RBM14,ATP5B,CIZ1,SRSF3,ZC3H13,SERBP1,ATRX,CSNK2A1,RRAGC,CLTA,YTHDC1,F11,SUMF1,TBL1XR1,LARP7,TSC1,HNRNPA3,MORC3,SCAF4,METTL26,FAM49B,RPL35,ELOC,ZMAT2,RPS19,NFATC2IP,CHMP7,REPIN1,HNRNPA0,NAP1L4,FMNL2,DEF6,FAM117B,POLR3E,NSRP1,NCL,NDUFB5,IRF2BP2,ALOX5,ARGLU1,SLC4A7,KDM6A,CT…
0.000831494069994882	RBMX,RPS20,GATAD2A,RPS11,RPS26,CNBP,LSM6,RPL35A,ACTA1,SRSF7,MRPS33,LARP7,CLTA,RPS5,RPS19,YBX1,KPNA6,MRPS34,LMNA	RBM14,PHF5A,SRRT,RBMX,RPS20,GATAD2B,SUMO3,GATAD2A,RPS11,PNN,RPS26,IK,ARID1A,PRRC2C,ARL6IP1,EIF4EBP1,RBM26,TPR,INTS12,PRDX5,CNBP,LSM6,PPCDC,RPL35A,MARK3,PPIE,ACTA1,SRSF7,SUMO1,THRAP3,MED8,MRPS33,REPIN1,LARP7,ZNF281,CLTA,KIF3B,KAZN,SRSF2,CNOT11,YTHDC1,RAPH1,RPS5,PCYOX1L,STX5,RPS19,DPH5,POP4,PPHLN1,EXOC3,SEPT10,IRF2BP2,MYH11,NECTIN1,TPPP3,CARS,MCCC1,CD163,RRP9,YBX1,GATAD1,EED,TIMP1,BPHL,CD2AP,STIP1,…
0.000831494069994882	RPS26,SERBP1,RPS29,SFPQ,MFAP1,RPS11,RPS18,YBX1,RPL35A,RFC5,EIF3A,SRSF7,CNBP,MEPCE,MRPL32,SNRNP70,RPS19,SF3B1,CLTA	ZFP91,PNN,SRRT,SMC1A,PRRC2C,RPS26,YLPM1,PCNP,MAEA,ARID1A,GATAD2B,SERBP1,RPS29,MARK2,BOD1L1,ZC3H14,SFPQ,CWC22,MFAP1,SMAD5,RPS11,RBM14,RSRC2,CLTB,MARK3,COX17,ACIN1,RPS18,NDUFA7,MARCKS,YBX1,PPHLN1,RPL35A,THRAP3,PPIL1,CHCHD3,FRZB,POLR3A,SYNPO2,MED8,RFC5,REPIN1,EIF3A,SRSF7,RBM6,CNBP,STIP1,ZMAT2,ARCN1,EFEMP2,LCLAT1,AFDN,SUMO1,EDF1,FAM98C,CFHR5,KERA,NOP14,CWC15,ZFAND6,GMPS,PTS,COA6,PLCB1,UBQLN2,MEPCE,RP…
0.00833841774453024	SLC4A1AP,GSDMD,KRAS,MAP3K4	HABP4,AP4E1,GGA3,PAK2,SLC4A1AP,MX2,IFT74,ECHDC2,MAPT,DHCR7,TOMM5,HEXA,TINAGL1,TPM1,SDF2,TMEM109,AP1B1,RABEPK,DNASE2,CPE,ZNF638,WDR43,FAM98B,NFKBIE,ICA1,SELENBP1,TARBP2,FAM122A,NDUFB8,TUT1,HPS5,LUC7L2,PREPL,CLSTN1,EPHB3,PPP2R2A,WDR61,RAB34,AMACR,GMPS,PHYHD1,NECAP1,GSDMD,PIP4K2B,CPQ,C12orf29,TRA2B,EIF3M,CTNNB1,SARDH,LDAH,ATP1B3,RERE,PLPBP,GORASP2,SIGIRR,TDRD7,NDRG2,CACUL1,AHNAK,ARFGEF3,PSMC1,PITPNA…
0.00414337126977096	MICALL1,ACTR5,ANKFY1	RPS26,PTBP1,PNN,CWC22,PRRC2C,MARK2,ARID1A,RPL32,MARCKS,RBBP6,FCHO2,VAMP8,ZFP91,SRPK1,GATAD2B,RPL29,SRRT,ATXN2L,RPS11,ZNF638,TARBP2,SRSF3,DNAJC8,ELOA,UBP1,ATP5B,NOL8,SETD2,C19orf47,THRAP3,IKBKB,MLST8,BRCC3,CMC4,PLPBP,ERLIN2,VPS39,EPCAM,PDE6D,SMC3,MICALL1,STARD10,ZNF668,SHPK,EIF3C,EXOC7,CCDC93,ACTR5,COA6,IFI35,ANKS1A,VAV3,NDUFA7,RBCK1,CMBL,PSMD4,MYO5B,FCER1G,SNX2,BRMS1L,LGALSL,MAPK9,TBC1D9B,ING1,AN…
0.00322903126518004	MKI67,RPL10,SUMO2,TRIP4	ATXN2L,ZFP36L1,MRPS18A,MKI67,PNN,SNRNP70,MAEA,CSTF2T,ARID1A,RNF113A,GATAD2A,IRF2,ZNF24,RPS11,PPP2R5B,EIF2S3,RPS3A,RSRC2,ZNF638,FAM76B,TXLNA,FUT11,SAR1A,GATAD2B,PRPF6,TCERG1,RPS19,ZC3H15,MARK3,ZCCHC6,SFPQ,SRSF7,EIF4B,UQCRQ,RPS15A,SP3,RBM22,SCO2,STAP2,ABHD14B,MYO5C,ACAT1,PRKAR2A,CHERP,SARM1,AHNAK,SLK,SUMO3,PLAT,RPL10,CBR4,VDAC3,PKIB,ACAT2,EIF3C,AMPD3,NT5C2,NOSTRIN,SULT2B1,WDR19,ARHGEF1,MOCS3,BAG1,T…
0.00541509731314145	MLPH,RAB27B	MLPH,ELP3,PCBD2,CASP6,UBA3,BCAS1,FOXA1,ACSS1,RAB27B,BANP,STARD10,PHPT1,AKR7A3,BET1L,RBKS,TRIP11,TKFC,INTS14,ATP8B1,HSPB1,RFXANK,NCKAP1,SEPSECS,MCUR1,RPS6,RNF220,FARSB,ROCK2,WDR77,RABGGTA,PTPA,GPS2,PPDPF,MAVS,BRCC3,DLG3,MYO18A,PPCS,POLR1E,F11R,CRLF3,HMGCL,HOOK3,PDF,TSC2,GBP1,NUDT14,LAMB1,ELMSAN1,ICAM1,NCAPD3,ASS1,RRP36,TBC1D9,CMTR1,PLEKHF2,CLIC3,SMG5,MTPAP,SYTL4,IFT172,SMARCB1,IFT80,OSBPL3,CEP135,…
0.00541509731314145	MLPH,RAB27B	GATAD2B,SARNP,SMC1A,RPS26,PNN,PPIL1,CDKN2AIP,ZFP91,RSRC2,RABGAP1L,MARK2,SAR1A,MAEA,BLOC1S5,SRRT,DCAF5,RBM14,CHMP2A,ARID1A,FCER1G,UBL5,ISY1,ZC3H14,PPIE,PRDX5,EIF4B,ZFAND6,COMMD3,YLPM1,HGS,SLTM,UBAP1,PPP1R11,TG,CDC73,RPS11,UQCRQ,RPS29,SFPQ,VCAM1,MLPH,PIP4K2C,LGALSL,LAS1L,GLS,CCDC93,TSC1,SNRPN,ALDH1A3,SPRYD3,SLFN11,CD180,ECHDC1,DOCK7,ATP6V1G1,PRTFDC1,SAFB2,TRAF2,XPOT,PPP2CA,ITGA3,CRYAB,CPNE2,CSNK1D,…
0.00541509731314145	MLPH,RAB27B	MLPH,PTPRF,MEF2D,UBR7,PIP4K2C,SYF2,RAB27B,HAUS2,ABRAXAS1,PTPRE,CORO7,KCNAB2,FBXL6,HMGCL,ACADVL,MAP4K4,RASA1,DNPEP,MTMR3,IDS,CASP6,PGM3,QKI,MIA3,LIMD1,ACBD6,ZDHHC13,CARD14,AHDC1,CRELD2,RIT1,EEFSEC,PSAP,AP2B1,PATJ,LIMA1,PRKACB,ANKRD44,PRCP,BRD7,DOK2,IFI16,AP1M2,ENTPD1,MX1,OSBPL11,DPP7,ATP6V1G1,ROCK2,EOGT,AACS,TRIP11,REXO2,NIPSNAP3A,SIRPA,RBM15B,WDR77,MCM3AP,TBL1X,ASCC2,SH3GLB2,ETFRF1,BET1L,MASTL,AT…
0.000430111902377404	UTP18,DDX52,RPS15A,UTP15,IMP3	NAT10,VWA5A,CMSS1,NAA15,BLVRB,MYBBP1A,TANGO2,ZFP36L1,UTP18,NUP107,EIF4A3,RDX,NAA10,RRP1,ADNP,SERPINA1,ABHD11,KIN,PPME1,DAXX,MTM1,TWISTNB,CLGN,DDX47,CRAT,CNOT1,NFYC,TMPO,BPIFB1,TATDN3,WDR46,ATN1,BTD,CTPS1,MRM3,UBR4,UTP4,UTP6,CEBPB,SNIP1,PRPF8,DDX52,PHPT1,RPS15A,ATAD2B,PPP1R14A,CFAP20,HSPA2,PDCD11,XPO1,CAPZA2,CEBPZ,FBP1,UTP15,CHAF1A,MMAA,ISG20L2,TRIM36,SNUPN,USE1,PPP1R12B,FAM172A,HID1,XIAP,DCUN1D5,…
0.00282861721674689	MSH6,MSH2,MORF4L1,CDC5L,XRCC6	MSH6,SLC4A1AP,MCM3,CSAD,CHAF1B,WDR74,TNS2,DEK,SMCHD1,SMNDC1,SMC2,MCM5,MCM6,RANBP2,MSH2,RPL12,NKRF,WDHD1,ACAD9,POLR1E,SF3B2,DDX3X,CHERP,PRPF40A,UTP18,MORF4L1,ESRP1,SNRPD2,SLIT3,ADH5,RFC3,SRPK1,AKAP8,CSE1L,COL2A1,NCAPG,FUS,GNB1L,THOC5,ZMYND8,STMN1,NSMCE2,DDX50,MRPS35,DDX47,UBE2S,THOC1,CENPF,SNRPA1,NGDN,DNMT1,MTUS1,NAA15,EZH2,PFDN2,RPL38,SF3B6,MFAP4,UTP15,NONO,CD180,KIF4A,MANF,ADAR,HSCB,SPAST,ZC3H15…
0.00854121907456476	CUL1,MTSS1	MBLAC2,MKRN1,PTAR1,RHOA,GTF3C6,SNAP29,RBL2,ARRDC1,WEE1,VPS13A,MUC1,NDOR1,TRNAU1AP,RPS19,AAMDC,SSR2,GNA11,MTMR1,ACTR6,EHBP1L1,UBE2Z,CIZ1,ZNF668,GALNT6,STAT3,LALBA,CEP120,ELOC,AARSD1,ILKAP,CHGB,ATF7,RSRC2,SCYL2,MEX3D,OARD1,ZNF592,ANXA9,XAF1,CDK16,PPID,UBR2,RPS3A,EHD3,FGF2,PKNOX1,NRBF2,DDX3X,FRMD6,UTP4,TFCP2,FCER1G,HOMER3,CAPZB,ZADH2,TRIP10,KANSL2,BCAP31,CREB1,CUL1,DHRS7B,DNPEP,SLC25A4,CCDC51,MTSS1,…
0.00527038049254441	MX1,ISG15,CAB39L	EIF2AK2,MX1,IRF9,LTA4H,USP18,ISG15,SERPINA6,WDR37,IFIT2,DTX3L,HELZ2,APOD,CAPG,SAMD9,OAS2,IFIT3,TF,NCS1,POLDIP2,F2,CHAF1B,VIRMA,ERCC4,IFI44,CMTR1,TTR,GBP4,RPAP2,NDUFB10,FOXRED1,TXNIP,BTF3L4,MTERF3,HINT2,LRRC57,CRTAC1,PSMA3,CDC5L,CCDC115,IRS1,NECAP2,CTSG,DDAH2,ARAF,PDLIM2,HNRNPH1,CFI,CPS1,NDUFAF3,APLP2,LACTB2,LHPP,UBE2O,ARHGEF7,USP9X,AKAP1,ANXA3,POU2F1,CUL4B,ME1,IMPA2,TRAPPC12,UPF2,NBN,TRAP1,ABHD11…
0.00197476168783433	POLR1E,RPL27A,AKAP8,NAA15,SNRPD2,NONO,LYAR,DNMT1,UTP15,CEBPB,CHTOP,SF3B6,POLR2H,RPL5,POLR1B,RBM34,NHP2,FBL,RPS2,SMC4,SRSF9,ALDH7A1,PNN,PES1,NUP153,SRSF1,PLRG1,CMSS1,PCK2,RPS3A,PSMA1,EEF1D,HADHB,NKRF,UQCRC1	POLR1E,RPL27A,AKAP8,NAA15,NAA10,TRMT1,SNRPD2,NONO,LYAR,CARTPT,DNMT1,CHGB,UTP15,WIZ,CEBPB,RPUSD2,CHTOP,PABPC4,NACC1,MPHOSPH10,SF3B6,POLR2H,RPL5,POLR1B,RBM34,NHP2,UBE2V2,FBL,GTF2E1,RPS2,SMC4,PREPL,BPIFB1,NFKBIE,PLCB1,SRSF9,PBLD,VPS36,CSTF2T,ALDH7A1,GSTM5,RIOX2,DPY30,LSM4,PNN,SNRPN,ORC2,TSPAN15,PFDN2,ARMC6,RPL10,PES1,NUP153,HDAC4,FGGY,SRSF1,NDC80,CLEC3A,MFAP2,SBF2,USP39,SMG7,PLRG1,C2orf49,C12orf43,C…
0.00445125325413644	TPR,IK,ZMYM3,RANBP2,RPL22L1,RHOG,TFRC,SNRNP70,TWISTNB,NONO,EEF1D,RPS3A,LUZP1,DSP,U2SURP,POLR2H,RPL12,SAE1,UBR4,ZNF326,RAB3GAP1,ZFYVE21,UTP18,CSDE1,PACSIN1,HNRNPU,PDCD6IP,EIF5B,POGZ,PKP1,EIF3I,NT5DC1,MRTO4,PPIH	GTF2E1,COA7,EXOSC6,TPR,DCLK1,IRF2BP2,ARRB1,IK,CMIP,WIZ,WDR43,ZMYM3,RANBP2,WASF2,MAOA,RPL22L1,ZC3H15,ZNF598,CST3,RHOG,SNRPG,VPS39,TFRC,TBC1D5,SNRNP70,GSTM3,C4orf33,HMGB1,VBP1,IMPA2,TWISTNB,GALNT7,ENOSF1,NONO,EEF1D,ADH1B,RPS3A,CPB1,LUZP1,DSP,U2SURP,PDRG1,POLR2H,KDM4A,DDX3X,PSMF1,RPL12,SAE1,UBR4,NDUFA11,SYNPO2,ZNF326,NBN,ENGASE,RAB3GAP1,TUT1,DNAJC7,UTP4,ZFYVE21,UTP18,CSDE1,PTPRJ,PACSIN1,TAX1BP1,HNRN…
3.99234657034095e-09	POLR1E,RANBP2,UTP6,NUP205,NONO,UTP15,HEATR1,RPL30,TBL3,POLR2H,DCAF13,LRPPRC,ANXA5,MTHFD1L,NUP93,RPL27A,NOL11,CD3EAP,NAT10,PDCD11,SMTN,RPS2,SENP3,NAA15,MRTO4,EIF4G1,NAA50,NUP133,U2SURP,UTRN,KIF2C,DHX57,UTP18,WDR74,NOP58,TWISTNB,POLR1B,ACTN1,GART,TEX10,AKAP8,CORO1C,SRP14,DSTN,CMSS1,ARAF,SBDS,RPS17	POLR1E,RANBP2,UTP6,NUP205,UBE2S,UTP4,SYNE1,NONO,UTP15,HEATR1,RPL30,TBL3,GALNT7,PUS7,POLR2H,DCAF13,KDM4A,LRPPRC,PUM3,ANXA5,MTHFD1L,WIZ,NUP93,RPL27A,NOL11,BRK1,SETDB1,SYTL2,CD3EAP,PWP2,NAT10,PDCD11,SORBS3,HPGDS,SMTN,RPS2,SENP3,NAA15,DIAPH2,MRTO4,EIF4G1,NAA50,ABT1,CSRP2,NUP133,U2SURP,UTRN,KRI1,TRIOBP,KIF2C,UHRF1,KANK1,USP47,DHX57,UTP18,LENG8,WDR74,WDR89,NOP58,TWISTNB,POLR1B,NUF2,MAD1L1,CDH13,THOC1,H…
0.00757764794404034	MYH9,CDC73,LUZP1,IVNS1ABP,SNW1,CFL1,TPM1,DAPK3,DSN1,FLNA	EIF4G1,MYH9,DDX3X,HIBADH,IL6ST,CDC73,FADS2,RPS2,LARP4,ABI3BP,DNMT1,TOP1,HEATR5A,HPX,LUZP1,IVNS1ABP,ZRSR2,ZFP36L1,NMNAT3,SDR39U1,TUFT1,TMEM214,SULF1,NSDHL,GPD1L,PPM1G,PPP1R18,SERPINA5,IGF2R,ZC3HAV1,PEBP1,TOM1L1,CPS1,SF3B1,PSMD3,BAZ1A,RPS3A,EIF5B,PRMT9,MYBBP1A,CLU,RPL12,STX10,NAA10,PRPF6,FUCA1,DDX52,RAPGEF6,EMC4,SNW1,FAM3C,ZFYVE21,AGFG1,CSRP2,TXNL4A,LAMTOR1,NKAP,AARS2,RBP7,CFL1,OPA1,MAZ,RAB23,TJP2,…
0.00453443796302455	ACTG1,CDK2,RAI14,MYO5A,YEATS4,COBL,TPM4	DENND4A,UCK1,CNN2,EIF3K,CSN2,DOCK10,DNAJC12,RAB27B,PFKM,DIAPH2,BPGM,RRS1,PKN1,H3F3A,CKAP5,AP4E1,SERPINB10,NDUFAF6,NEDD4L,FBLN2,PES1,ENPP4,RENBP,C11orf96,CRTAP,SNX29,UBE2Z,MLPH,LRRC15,MED14,FAM49A,BCHE,PTRHD1,TSPO,GALT,TRPT1,HCCS,ACTG1,DDX49,CIC,MX2,PHF8,IKBIP,RIOK1,ALDOC,CDK2,TRAF5,PTGES3,ETFB,ABHD4,RAI14,GCC1,TBC1D22A,SCRIB,STX10,MYO5A,MIF4GD,DDX58,PUM2,BABAM2,VCPIP1,SGF29,UBE2F,DNLZ,GPX7,MTMR2,…
0.00187903252157232	NAP1L4,NCL,MEPCE,SYNPO,CSNK2A1	SFPQ,C3,THRAP3,GPLD1,NAP1L4,PRPF6,TF,SF3B1,RSU1,NOP56,KANK3,ANAPC2,SOD3,SNRNP70,DDX23,MCAM,RB1,C4BPB,PGM5,PTMS,ARHGEF17,ADH5,TAGLN,CKB,PLXNB1,SYNPO2,AMBP,RBM25,PROC,CEP57,ENSA,CCDC102A,FABP4,CPB2,ITIH4,DUSP3,FBXO6,F13B,NCL,LEO1,MRPL38,MEPCE,TGFB1I1,PRR12,MYL6,CNOT11,SMARCA4,HEATR5B,ZC3H12A,GSTM4,HRG,MAX,PPID,CEP135,SNX18,SYNPO,NCS1,SIN3A,DEFA3,EXD2,ARAF,FAM83H,PPP2CB,FSTL1,APOC4-APOC2,PAK4,FABP3,…
0.00446711850018009	NAV1,GIGYF2,CEP128,KSR1	GPLD1,NAV1,SPTBN2,GIGYF2,COL18A1,OPHN1,RPS10,NOS1AP,KDM2A,RFWD2,E2F4,TTC9,APOD,PROS1,DR1,SNU13,MTMR12,PPP1CA,C1orf122,NR2F6,MRPL51,CDK4,SS18L1,HLTF,CCDC61,C1orf27,ZW10,RPS6KB2,LTN1,YRDC,NUFIP2,PCCB,RBP4,SERPINF1,HNRNPK,CLIP1,CCZ1,SIRT6,IGFBP4,BCAR1,NPRL3,CS,RABL6,CAT,PEX14,UPRT,RANBP1,NELFE,TOR3A,ITGB4,ALG5,ERAP2,NPEPL1,F10,S100A1,TRMT2A,CD81,SRSF9,KLHL36,KMT2A,RPLP0,ECE2,NID1,APOA4,STXBP1,RAB12,…
0.000216989376110629	SMC2,SMC4,MCM3,NCAPD3,PPP2R2D	MCM6,SMC2,CEBPB,SMC4,NOSTRIN,DDX3X,HMGB3,CHMP6,KDM4A,CHAF1B,NCAPH,BOP1,HLTF,MCM3,PTGS1,FAH,GC,GSK3B,AHSG,ZNF318,NCAPD3,NDC80,PDRG1,H1F0,ABCE1,ANKRD17,BANP,KARS,ASH2L,SERPINA3,GLO1,MTERF3,SSC5D,CELF1,CLU,DEK,TRIM2,LSG1,CIP2A,CSE1L,CKS1B,MDC1,ASNS,TTR,RPP38,ADD2,NUP93,SNRPD2,POLA1,MFAP4,UBE2T,DAB2IP,MOB4,PHGDH,THBS4,TONSL,IVNS1ABP,TXNDC9,MRPS26,CRELD2,NSMCE2,PIR,UPRT,PDIA4,RHEB,CAPRIN1,NCAPD2,PRDX4…
0.000168058505710012	SMC4,NCAPG,NCAPD2,NCAPH,SMC2	PNN,SERBP1,ATXN2L,YBX1,ZFP91,ELOA,PRRC2C,BCLAF1,THRAP3,CWC22,ZNF638,PPM1G,SMC4,COPE,SNRNP70,TXLNA,TWISTNB,SMC1A,PCNP,PTBP1,MARCKS,SRSF3,SRRT,ABHD14B,RPS26,NOLC1,LARP4B,EIF4G1,NCAPG,RUBCN,PTMA,NCAPD2,NCAPH,PTBP2,UHRF1,SMARCA4,EFEMP2,RFC1,TTC13,DNAJC1,POLR2M,USP11,ARVCF,CSAD,MYBBP1A,TARBP2,SMC2,MARC2,BZW2,RNF7,NSMCE2,VMAC,AKAP8,ALOX15B,PPP6R2,HMCES,MRPS12,CAMKK2,ZNF622,CST3,SUMO3,PEPD,SUCLA2,BTD,ES…
7.42796145523473e-07	SMC4,NCAPD2,NCAPG,SMC2,NCAPH,CDK1,FEN1	DNMT1,SMC4,EIF4G1,ANLN,RRBP1,BBS1,HMCES,EEF1D,NCAPD2,NCAPG,PRPF6,EML2,SMC2,SELENBP1,NCAPH,EIF5B,GBP1,ABHD14B,CEP44,SNX9,SERPINB6,MYO1C,GPX3,EML4,CHAF1B,KRT18,KIFC1,C12orf45,SLC4A1AP,SF3B1,SDF2,KIAA0907,KLC1,CNRIP1,SERPINA4,PHGDH,CMBL,NUP153,CDK1,BCAS1,RPS25,SH3BGRL2,HNRNPDL,KDM4A,SP3,THBS4,DDX3X,SF3B2,CHD4,EXOC6,ARGLU1,NAA15,C12orf57,PES1,POLR1E,PLCD1,SUOX,KIF22,LAMTOR3,VCAN,DDX39B,FEN1,PKN2,CBS,…
0.0027084224554571	NCAPH,SMC2,NCAPG,SMC4	IL6ST,ENTPD5,RBKS,PHYHD1,ASAH1,SUB1,XPA,MYO1C,PURA,HYI,C1orf226,EML4,AZGP1,NCAPH,SMC2,KIF16B,TACC3,AHNAK,NCAPG,INTS3,ANLN,EEF1D,KIF23,SCUBE2,FBLN5,SH3BGRL,THSD4,POLB,UPP1,EIF2S3,GP2,COLGALT1,GNL2,AHSA1,EHD2,FAM172A,SMC4,TOLLIP,SSH3,BAG1,NUDT18,TROVE2,MCM5,MCMBP,HDAC5,MINDY1,NDC80,BTD,SDF2,GNPDA2,ANPEP,KDM3A,ALDH5A1,PARK7,NAGLU,PLAU,SLC4A1AP,CSE1L,CDC27,DCAF13,SEPHS2,SERPINE2,PSAP,HMGB1,DDX24,SUOX…
0.0027084224554571	NCAPH,ATF7IP,SMC4,SENP3	NCAPH,WDR74,PLRG1,AGT,SOD3,DNMT1,MTURN,PIR,CKAP5,CMC2,NAA15,ENTPD5,TIMMDC1,HLA-DQB1,ORM1,GSPT1,KIF4A,MGLL,GPATCH4,PBK,GBP4,CLU,ADPGK,PGM5,ABCF3,NAV1,SF3B5,TBL3,MARC2,SDAD1,MAP3K4,L3HYPDH,DENR,MAP1B,BTD,STAT5A,CHD4,MYH11,OTUD6B,WARS,SPARCL1,ATF7IP,PCCB,CHERP,ITIH5,CAVIN2,EMC4,LSG1,MPHOSPH10,SUOX,GRB2,SNX5,SMC4,GBP5,TRMT1,GPD1L,ENPP2,CADM1,DDX3X,CP,MAN1A1,AMOTL2,NAT10,SERPINA3,TIMM29,GNL2,SSC5D,DTN…
0.00272802046138785	RPS26,PTBP1,RC3H1,SRSF3,YBX1,SMC1A,PHF5A,CBX5,ZC3H15,SUPT6H,LYAR,RPS3A	RPS26,GATAD2B,TXLNA,RPL32,TBCA,PTBP1,RPL29,SARNP,MARK2,RACK1,PPP1R11,SUMO3,PNN,ASNA1,NDUFA7,VAMP8,PFDN6,RC3H1,CAMK2D,CLTB,WDR89,MRPS15,UQCRQ,RPS11,ATXN2L,SRSF3,ELOA,PGAM2,YBX1,SMC1A,MRPS18A,PHF5A,CARTPT,ZFYVE1,CCS,HNRNPDL,SUMO1,RPL26,KCMF1,TINAGL1,IK,C1orf35,CHMP3,LAMA5,SAMD1,MORC3,WWP2,PVALB,CBX5,CCDC93,TST,EHHADH,FHL2,CLINT1,ATP2B1,PAK4,PSME3,CKMT1A,OSBPL11,UCK1,ZC3H15,KRT16,SUPT6H,DYSF,DGUOK,L…
0.00782536719324039	YBX1,RPS26,NCL,PHF5A,EIF3A,RRP1,WDR46,WDR43,RPS5,RPL35A,RPS18	NOLC1,YBX1,SLTM,ZC3H18,ZNF330,SERBP1,C19orf53,EDF1,RBM6,CCDC86,ARGLU1,RPL26,TRIR,PNN,ZFP91,TTR,MFAP1,BRD1,MARK3,SAFB,HMGB2,CHMP2B,RBMXL1,SUMO1,RPS26,RPSA,SUMO3,NCL,SAP30,RRP8,ZC3HC1,MARCKS,RPL10A,TG,SNRNP70,PHF5A,EIF3A,RRP1,ZC3H13,WDR46,SPARCL1,C19orf47,ZC2HC1A,WDR43,LSM6,ENTPD5,RPS5,RPL35A,RABGAP1,ZFYVE21,CSN2,PPM1G,SORBS1,PRRC2C,PPIL1,CADPS2,SNW1,RABGAP1L,SLC27A2,HBA1,SAFB2,RPS18,BUD13,PLCL1,AK…
0.00689728285801005	NDRG2,RABAC1	RBM14,NDRG2,RPS11,CDKN2AIP,SUMO3,ZFP36L1,MARCKS,PRRC2C,LSM6,RBMX,PHF5A,RPL28,ACTA1,RPS26,ROCK2,MARK2,MAEA,CHMP2B,TSPYL5,PCNP,BOD1L1,UBQLN1,ASNA1,LRPAP1,UBL5,CUTA,GATAD2B,CLTB,CARTPT,PSMA5,COMMD3,SLTM,RPS20,PPIL1,EPHB3,ELOA,TOR1A,XPNPEP1,AHNAK,MTX3,GLS,TLE3,RALGPS2,EPB41,RABGAP1L,RASA1,MPP6,EML4,AFG3L2,ZFR,STARD5,COQ9,APPL2,RAB9A,MTHFD1L,PHLDA3,ACADS,GLIPR2,HDAC6,DPH5,HSD17B8,THOC2,RAB5A,MMP9,ERLI…
0.00351326567155774	NELFB,SUPT5H,NELFCD,YBX1	SFPQ,SNRNP70,GPLD1,CNOT11,SERPINA7,PNN,NELFB,BTD,CD93,CPN2,SERBP1,TINAGL1,ORC3,GPD1,C9orf78,HTATSF1,CCDC86,PCOLCE,CFL2,NOP9,TTR,CACNA2D1,ENPP2,THOC3,FETUB,NSD2,SRRM2,LYVE1,IGFBP6,C3,ADH1B,THRAP3,PGAM5,SUPT5H,KHSRP,SMU1,PTMA,AHSG,ILKAP,PRELP,BCL7B,STXBP1,CUL4B,SERPINA3,F13B,ALKBH5,NELFCD,ZNF24,UBE2S,HMCES,TPRG1L,YBX1,CRTC3,PLG,GSTM4,CNPY4,ZC3H18,VTN,SYNM,XRN1,ASPM,ALB,CSTF2,UGP2,ABHD5,APOC1,AASS,M…
0.00351326567155774	VIM,SF3B1,LAS1L,NES	TF,BYSL,VIM,EHBP1L1,SF3B1,APOC3,UBA3,LIMS1,WISP2,NUP107,RCL1,UTP20,CSNK2A1,PRPF8,RSU1,GC,PRKDC,SRP68,UTP3,DDX47,SERPINC1,VIRMA,SDAD1,IPO7,APOC4-APOC2,TTC27,AIMP1,ATP5J2-PTCD1,NOC4L,PRPF6,USO1,MRM3,LAS1L,USP9X,PELP1,SERPINF2,SPP2,CDH5,TFIP11,SEC61A1,TTR,HMCN1,F13B,POP1,BMS1,ME2,TRIP12,AHNAK2,SPG11,APOA2,TDRKH,STK26,MINK1,PLCD1,FLNB,APOA4,NES,NCS1,PNO1,SNX29,ARHGEF5,SENP3,CRISP3,BROX,APOH,INTS13,C1…
0.00351326567155774	CCDC88A,AMBRA1,TMEM132A,OBSL1	AR,CCDC88A,ST3GAL1,NOP56,ZNF217,NFATC3,AMBRA1,NOP10,PKIB,VPS28,SSR1,CACUL1,ARHGDIB,SYMPK,TMEM132A,CHCHD1,EPHB4,ARL6IP4,PNO1,CARHSP1,C12orf10,RPL4,GNPAT,NIPBL,OBSL1,MINDY1,WAPL,DBN1,FYB1,NLRP2,WWP1,FDX1L,ISG15,MTMR2,NAA40,NDUFA1,CLU,ATP6AP1,RIT1,CDKN2C,RNF214,FOXP4,EDRF1,NXN,HSD17B7,PUM1,LLGL2,MAGI3,PLEKHO2,PARVB,FPGT,DOCK8,STXBP4,FIG4,NADK,RRP7A,PITPNA,SPATS2L,PEX3,PLVAP,CEP192,C7orf43,DNAJA4,ARR…
0.00351326567155774	NES,UBR5,FLII,LMNB1	NES,CALU,MTHFD1L,TTL,FLT1,PCLAF,SENP3,IPO7,PUS7,UBR5,CKAP5,UBA3,TTC27,UTP20,WDR20,ATG16L1,CTR9,XPO4,ANKRD27,PELP1,VAMP7,MLPH,ACTN4,VCP,C3orf38,RIT1,NUP160,RANBP2,RANGAP1,YEATS2,RCL1,SRF,LTN1,TTC4,AFDN,METTL3,RNPS1,LGALS8,WDR75,TSC22D3,OSBPL11,IMPA2,FOXA1,MICAL3,ARHGAP21,ATF7IP,ZNF318,NIFK,FAM98A,C2orf69,SND1,NUMA1,FLII,PSMD4,RPS15A,ADNP,RIOK1,PUM1,COA7,SGF29,CHEK2,SNAP29,SNRPA1,CTNNBL1,ZGPAT,KIFC…
0.000742640950587625	SUFU,NFATC3,MAPK8	RPS19,SOS1,CLTA,CSTF2,SPARCL1,PGAM2,RPL18A,SECISBP2L,SSU72,TGM2,APOD,AP5M1,KLHL42,REEP6,ENPP2,SERPINA7,PSMD9,ANAPC16,KCTD9,ARHGAP24,GOSR1,ZC3HAV1,AIFM2,TSR2,LAMA2,C11orf96,PAPLN,PMS1,SYMPK,SRSF7,RNASEL,SLIT3,MAP2K5,KDM2A,RPS6,NEB,TRAPPC2,RPL10,CWC22,BOD1L1,RPS15A,HEATR1,IRF2,SUFU,SUPT5H,VIM,BMS1,ALB,FABP4,ATXN2,CNRIP1,LGALSL,CST3,NFATC3,NFKB2,CPN2,ACAT1,FAM129A,ZMYND11,CAMK2G,APOA4,ASPM,H3F3A,REE…
0.00118600005379746	TNIP1,COMMD8,COMMD2,STAT6,NFKB1,COMMD9,NFKBIE,MPP6	TTPAL,TNIP1,COMMD8,SPAST,PKN1,LPXN,COMMD2,GIT2,RPL27A,CELF2,STAT6,NFKB1,EGFR,FAM96A,GRB2,SERPINB1,STARD5,SH3GLB1,CHMP4B,RHOA,CDV3,RPS24,PLRG1,LRCH3,PPP1R14A,TSFM,COMMD9,DNAJB4,SRP9,CSK,LSM4,SRSF9,ADAM15,ARVCF,NFKBIE,PEX19,COTL1,LACTB,CASP3,SASH3,PPP1R12A,KARS,ATG3,APOD,CD99L2,SBSPON,VPS13B,PSPC1,NRBF2,CHGB,BPIFB1,DEF6,PCNP,GGA3,C1orf123,SAFB2,PSMD8,STK26,ARHGAP45,NECAP2,PLTP,ZC3H12A,ARRB2,SCYL2,A…
4.45349005978681e-05	TNIP1,COMMD2,COMMD9,NFKBIE,COMMD8,STAT6,NFKB1,MPP6,BRMS1,HSPA4	TTPAL,CHGB,TNIP1,GIT2,CARTPT,PKN1,LSP1,LPXN,DGKA,SPAST,CCDC93,EGFR,COMMD2,COMMD9,IRF5,ZGPAT,ATG3,LRCH3,CCNY,LMNB1,ERP29,NFKBIE,COMMD8,CELF2,DEF6,SNRPN,ARRB2,RPL27A,RPS24,TSFM,FAM96A,RAPGEF6,GGA3,PEX19,SYF2,ADPRH,RNF25,SUN2,STAT6,PLRG1,MORF4L1,VPS13B,GRB2,HIST2H2AB,FYB1,GMFG,TMEM230,DBNL,SNX17,FECH,NFKB1,RRP7A,ARHGAP9,DIP2C,ARHGAP45,MPP6,NR2C2AP,WDFY3,GRAP2,DUS1L,CNDP2,KLHL22,PSMA1,TOR2A,CASP6,AGO…
0.001339328486611	SRSF3,YBX1,NFX1,RPS19	SMAD5,ZFP91,ACTBL2,ARGLU1,COMMD10,SARNP,NUP43,RPS18,MRPS18A,SUMO3,SRSF3,UBN1,TMEM263,SAR1A,ZC3HAV1,MARCKS,UBE2B,SCAF8,MARK2,BLOC1S5,PCNP,ATXN2L,UBTF,SAP30L,RBM26,GPS2,JAK1,PPP1R11,TBCA,SP3,TPRKB,ACIN1,ATRX,CMC4,HDDC2,PRRC2C,NDUFS6,EIF3A,YBX1,CCDC9,CIZ1,AP5B1,CDC37L1,DAZAP1,NFX1,REPIN1,RBM6,MZT1,C19orf47,KIAA0907,DDX39B,RBMXL1,ELOA,TMEM106B,NEMF,PPIE,ATG101,HGS,WTAP,APOO,YLPM1,RBM14,CHMP2A,RNPS1,U…
0.00883361204294807	SMC1A,SMC3,RPA3	EIF3A,VEZF1,PPP1R12C,PPIE,SMC1A,PNN,ZNF787,CDKN2AIP,RPL35A,RBM6,GATAD2B,SARNP,BLOC1S5,MZT1,CHMP4B,GDI1,YLPM1,NDUFA11,DPH5,CSN2,ZNF24,STAM,RPS29,HSPB11,RPL22,PPP2R5B,MAZ,RALY,MAEA,SAR1A,ACTA1,HPCAL1,SMC3,SCGN,GLMP,UBL5,CREBBP,ZFP91,SRRT,RPS19,EIF2S3,FNBP4,MED21,INTS12,RACK1,TMEM263,TG,PPIA,ZC3H18,SUMO1,FOXP1,FAM117B,IDH3G,FOXP4,UBXN4,GID8,FAM192A,MRPL40,PDCD6IP,MICU2,C5orf24,SNUPN,ELL,TELO2,SYK,PR…
0.00883361204294807	SMC1A,SMC3,RPA3	EIF3A,VEZF1,PPP1R12C,PPIE,SMC1A,PNN,ZNF787,CDKN2AIP,RPL35A,RBM6,GATAD2B,SARNP,BLOC1S5,MZT1,CHMP4B,GDI1,YLPM1,NDUFA11,DPH5,CSN2,ZNF24,STAM,RPS29,HSPB11,RPL22,PPP2R5B,MAZ,RALY,MAEA,SAR1A,ACTA1,HPCAL1,SMC3,SCGN,GLMP,UBL5,CREBBP,ZFP91,SRRT,RPS19,EIF2S3,FNBP4,MED21,INTS12,RACK1,TMEM263,TG,PPIA,ZC3H18,SUMO1,FOXP1,FAM117B,IDH3G,FOXP4,UBXN4,GID8,FAM192A,MRPL40,PDCD6IP,MICU2,C5orf24,SNUPN,ELL,TELO2,SYK,PR…
0.00642000639505257	CNOT7,HDDC3,NMI,MTMR6	SMC1A,PRRC2A,MEPCE,CSN2,KIAA1143,AP5M1,RPL29,GDI2,CNOT7,SRSF3,CRIPT,MARK2,FBXL18,FAM177A1,NBEAL1,TBC1D13,BAD,RXRB,ATP6V1B2,UQCRQ,PRDX5,BOD1L1,TPRKB,JUND,USP11,TRIR,SLTM,RTCA,LALBA,SRRT,ELOA,EIF3A,TDG,QTRT2,ZC3H18,HDDC3,TMEM189-UBE2V1,TPR,TOR3A,LONP2,S100A10,GATAD2B,POLR2E,NHEJ1,DNAJC8,DES,GPX1,AAMDC,HMGB2,TCF12,UCHL5,ZFAND3,EPS15,CUL4B,NXT1,HOOK2,PPIL1,EIF3C,GIT2,NIPSNAP3A,PLEKHS1,XAF1,CDC42BPB,N…
0.00656493572270882	WDR36,HLA-DPA1,POLR3B	ORC4,DHX34,DLG1,EIF4G2,CYTH1,NDEL1,DNAJC12,MGME1,PDCD6IP,AIP,MIPEP,CD63,WDR36,SARDH,TFRC,NCOA3,SNTB1,PLOD3,STAT2,ARHGEF17,PLEKHG3,WIPF1,KPNB1,PARP14,CARS,WARS2,C3,PNPT1,ZSCAN18,SH3BP5L,NSUN2,ROCK2,CEP120,VPS52,HLA-DPA1,XPO4,PRKCI,BID,C2orf76,RIOK3,ACAT1,SEPT1,GNL1,PARP1,CLMN,FMNL2,CD74,ARHGEF10,ADA,BRD9,EPB41L4B,RBM12,DLD,RC3H1,RELL1,NES,ATG2A,NR2F6,ANK3,CDKN1B,USP9X,C8orf82,MDC1,CPNE1,CTNNA1,PBK…
0.00556181584302135	TCOF1,NOLC1,MFAP1,CHMP4B,SAP18,CSNK2A1	YBX1,SRRT,PRRC2C,ZNF787,SMC1A,PNN,RBBP6,ATP5D,TCOF1,PPIA,UBL5,POFUT1,RPL26,ZNF460,CUL4B,GPX1,NFKBIB,MARK3,STRIP1,NOLC1,RPL35A,HGS,CSTF2T,COL16A1,SLTM,COX17,BLOC1S5,SETD2,ZFP91,OXSM,ZFAND3,TXLNA,ATRX,EIF4B,PCNP,MFAP1,RREB1,BRD4,DUSP3,LSM3,ATXN2L,RTN3,BCLAF1,CHMP4B,VCAM1,TARBP2,SERBP1,SAP18,VPS25,NUP160,HPS3,MAP7D1,NUDT16,PFDN1,MRPL11,NDUFV2,ZNF574,FCER1G,PPP4C,NUMB,SEPT10,PRPF38B,NSMCE2,MMP9,NAP1L…
0.00652273692444622	CSTF2,HNRNPM,CHD4,CUL4B,RXRA,POP1,DYNC2H1	TRRAP,TIMP1,ATXN2,LZTR1,CSTF2,SYMPK,KNTC1,MED8,VIRMA,SOD3,SP3,DPH1,YTHDF3,HACD3,GTF2E1,CCDC90B,WDR3,HNRNPM,SCOC,FHL1,GOLGB1,POLR1B,ERAP2,APCS,RBMX,MRPS26,PLCL1,GGT5,HEXB,SBSPON,CRIPT,BRD4,ARGLU1,TIMMDC1,SH3BGRL2,EIF3A,KDM4A,SRSF4,KIAA1143,ZNF638,PAFAH1B2,TRAFD1,YTHDC1,HEATR5A,NCL,SEPHS2,PAK4,AAMDC,CREBBP,RPL14,CHD4,CWC22,YIPF3,MED6,LRP2,NR2C2,PLTP,SAMD1,RANGAP1,MAP1B,SLTM,PRR12,TLK1,USP8,DDAH2,CU…
0.00652273692444622	CSTF2,CUL4B,SFPQ,CA2,SON,SRRM2,ASAH1	CSTF2,TMOD1,CNOT3,JPT2,CD14,MGLL,CUL4B,PNISR,SYNM,ALDH1L1,ECHDC1,ITGA7,BMS1,STIP1,SH3BGRL2,PDE4DIP,DIDO1,PRPF6,PPP2R1B,PPA2,ZNF609,PDE5A,GOLGB1,DBNL,ILKAP,C9orf78,TRMT1L,BOD1L1,IK,MARK2,ARGLU1,ADGRL2,SOD3,S100B,SMIM12,RABGAP1,PLCD1,ARAP1,SFPQ,TRAPPC2,SHTN1,MYH11,TRMT61A,HMGN5,CNOT11,CA2,PPP1R3D,TXLNA,MIB1,SCGB2A2,EIF3C,DNAJC7,ELOB,GOT2,GPLD1,PRPF39,GSPT1,IWS1,THRAP3,PLTP,AIFM2,ARHGEF10,PLAT,RAP1B…
3.99069628245947e-08	CHD4,SRP68,FTSJ3,PES1,CEBPZ,NOP2,NAT10,TOP1,EBNA1BP2,MPHOSPH10,RPS2,DHX8,DDX21	NOP14,GPX3,EIF4G1,SF3B1,CHD4,SPG21,POP1,EIF3C,BBS1,FBLN5,BMS1,RRP1B,EIF5B,SERPINA3,EEF1D,LRG1,RRP1,SERPINC1,PRPF6,SRP68,AGT,ABCF1,FTSJ3,WISP2,PES1,CD109,CEBPZ,FRMD4A,IPO8,EP300,ASCC3,GNL2,ALPL,NOP2,SART1,SERPINA1,NAT10,SERPINF1,NUP50,HPX,HYI,ELOA,SERPINB6,BYSL,PPM1G,SMC4,CWC22,ANXA5,NKTR,TOP1,THRAP3,EBNA1BP2,SH3BGRL2,WASHC4,CST3,GINS2,NOC4L,RRP7A,MIB2,LSM2,DUSP12,COX19,LYAR,L3HYPDH,PRKAR2A,KPNA2,…
4.31402969597333e-10	CHD4,NOP2,CEBPZ,SRP68,TOP1,RBM28,WDR46,NOC2L,DDX47,MYBBP1A,PRPF8,RPL10A,NIFK,NOP58,MRTO4	SF3B1,SDAD1,CHD4,NOP2,EIF3C,MOB1A,RANBP2,EIF5B,ESF1,CEBPZ,CLCN7,APOH,SRP68,TOP1,RBM28,SF3B2,BZW2,GPX3,PDCD11,ISG20L2,WDR46,DARS,NOC2L,SART1,MDP1,BRD2,SUPT5H,CTNNBL1,CFDP1,ORM1,SEC61A1,EIF4G1,NOP14,DDX47,SMIM12,AGT,STRAP,MYBBP1A,PRPF8,MAN2A1,NOL11,TF,FBXO38,AKAP13,POP1,SYMPK,SELENOS,SH3BGRL2,GTF3C2,RRP15,SIGLEC1,RPL10A,GNL2,FLII,CNPY4,TBC1D22A,RRP1,UTP15,CUL4A,NIFK,SERPING1,ENPP2,USP47,PIK3CA,TIPR…
3.99069628245947e-08	NOP2,PES1,CEBPZ,SRSF3,WDR46,RBM28,GPATCH4,ZC3HAV1,NOLC1,TOP1,LMNA,CUL3,MRTO4	ZNF787,ELOA,MARCKS,PNN,ZFP91,SMC1A,NOP2,SERBP1,PTBP1,ZC3H18,YBX1,FCHO2,TPRKB,THRAP3,GNB2,NFX1,SRSF2,ESF1,PES1,TWISTNB,CWC22,SUMO3,SLU7,CEBPZ,FAM192A,RPL35A,IFT20,SRRT,MAEA,NOL8,GATAD2B,EIF3A,ATXN2L,INTS12,MTDH,PRDX6,SRSF3,GATAD2A,CUTA,SCAF8,WDR46,NUDT16,SMARCA4,FCER1G,PPM1G,CAPZA2,POLDIP3,RBM28,GPATCH4,SELENBP1,MLST8,TRIM4,RUFY1,SUMO1,SDE2,LAD1,KIN,PKP4,EIF2S3,TRAPPC11,SUGP1,TRIM32,SON,EIF3C,LYAR…
4.33540517792508e-09	CHD4,RPL10A,CEBPZ,NOP56,NOP58,MYBBP1A,PES1,NOC2L,PRPF8,CUL1,NOP2,RPL18,SRPK1,NAT10	CHD4,SYMPK,EIF4G1,MDP1,SF3B1,EIF5B,EIF3C,RPL10A,CEBPZ,PHF6,RRP1,NQO2,NOP56,LRPPRC,ORM1,NOP58,U2SURP,CDC73,DNMT1,NAT1,TAF6,TTC27,PLRG1,YARS,UBR4,NAA10,CNOT9,TRMT1,MYBBP1A,SF3B2,POLR1B,FAM172A,THOC3,PPM1G,YBX1,MAN2A1,ATP5A1,PES1,NOC2L,PRPF8,SH3BGRL2,CKAP5,WDR43,OPHN1,SCAMP2,PTMA,UTP3,RABGEF1,PELP1,KCTD21,SLC27A2,MFN1,UTP20,PPIH,CUL1,POP1,PRPF6,PDRG1,DYNLT3,ROCK2,BYSL,COL4A1,NSUN4,CYGB,HM13,APOA1,NC…
0.00055466418157132	EBNA1BP2,SRP68,RPL32,PES1,NOP56,UTP18,EIF2S2,MPHOSPH10,WDR36,MRTO4,ERCC6	XPA,PPM1G,EIF3C,FEM1B,ELOA,NOP14,EBNA1BP2,PRPF6,RNF40,SRP68,SEPT2,USP36,BPIFB1,TXLNA,KLHL42,AGPAT3,SF3B2,SF3B1,EIF5B,MARK2,ILKAP,TMED2,APOH,INTS12,INIP,MCRS1,PRPF40A,TMSB4X,CHD8,MMP19,RAB10,EIF3G,NEK7,SMARCA5,CYB5R2,SCAMP1,STIP1,RPL32,PES1,DYNLT3,EXD2,OXCT1,NOP56,ARFGEF2,REXO4,LIN37,MAEA,UTP18,ANPEP,PGLYRP2,LALBA,SNRPD2,UGP2,AIMP2,EIF2S2,LMAN1,DNAJB12,DDX23,GNL2,AGT,FAM207A,MPHOSPH10,PPCDC,WFDC2,…
0.00681941230576368	TCOF1,CSNK2A1,RPS11,RPL32,NCL,NOLC1,CCDC86,RPL12,EEF1A1	ZFP91,MARCKS,PNN,ELOA,SMC1A,BRPF1,GATAD2B,DNAJC8,PRRC2C,PCNP,MARK2,BOD1L1,SERBP1,PTBP1,TCOF1,SAR1A,RBBP6,RPS26,CSNK2A1,SUMO3,ISY1,RPS11,RPL32,THRAP3,CWC22,SDE2,GPATCH8,SRSF3,HGS,ZNF787,MFAP1,ARID1A,SETD2,RSRC2,PPP1R14A,MGME1,YWHAH,HNRNPR,SZRD1,MMP7,SBSPON,MRPL52,TBL1XR1,SNX6,NCL,HNRNPA0,ARGLU1,TWISTNB,GMPS,EIF3A,PALMD,SRSF4,EDF1,SAP30BP,C19orf53,OAF,RBCK1,UBAP1,TSC1,CDC23,GPN1,PSPC1,NOLC1,AKT3,CD…
3.64058539316445e-05	RPL18A,RPL5,RPS3A,RPL10,NOP56,CHD4,NOLC1,TCOF1,FBL	EIF4G1,PES1,EEF1D,SLC4A1AP,EIF5B,NAA15,DYNLT3,ECM1,PLAT,PLRG1,CHMP3,CPA3,NAT1,ELL,IFT80,RPL18A,RPS21,PPM1G,ACSS3,TOP1,NFKBIE,CHERP,RANBP2,RPL5,SORBS1,XPA,RPS2,RPS3A,GBP1,PHF5A,CLSTN2,RPL10,CDC73,EIF3C,CSTF2T,NOP56,CHD4,NUBP1,TIMM44,AGR3,MYBBP1A,EML4,CTNNBL1,NUP50,UBR4,RTKN,ARAF,CEBPB,EXOSC1,LYVE1,GNAI3,SRSF9,PTGDS,NOLC1,RAB25,TCOF1,INTS5,CCAR1,ZNF280C,CLP1,SMARCA5,ALAD,SOD3,ZBTB8OS,SERPINA3,RAB3I…
0.0060535926931219	RPS11,TCOF1,GLYR1,DKC1,FBL,NOP56	PNN,MARK2,RPS11,RPS26,SMC1A,RPS29,ZNF787,GATAD2B,TCOF1,NDUFA7,SARNP,UBL5,HDDC3,PRRC2C,PTBP1,NDUFA11,NUTF2,CLTB,ATXN2L,HNRNPDL,MARCKS,SLTM,LSM7,ARID1A,SRSF7,ZFAND3,SUMO3,HPX,PCNP,ZBTB14,AGT,BOD1L1,ZC3H4,CRISP3,CTCF,YY1,UBTF,IGLL1,TRAPPC8,GLYR1,INTS12,LSM3,RBM5,RXRB,MLST8,TMEM189-UBE2V1,COX17,DKC1,MTA2,SAFB,NFXL1,FBL,LALBA,AK3,DCTN1,IK,MED8,ZC3H14,COPS7B,SNW1,UBE2V2,UGP2,LRG1,CHD2,NOP56,TRIM4,BRCC3…
0.0060535926931219	NAT10,NOP56,ESF1,RSL1D1,CHD4,URI1	NAT10,NUP93,NOP56,SMARCA5,HEXB,ESF1,RANBP2,ZHX2,ACBD6,PES1,RBM25,UTP4,TRIP12,RSL1D1,NHLRC2,TSTD1,PCBD1,NUP153,UPF3B,NSD2,GUSB,SMC4,ARHGAP1,RRP8,HEXA,NONO,RBM26,SETDB1,CELF1,POLR2B,BAZ1A,CHD4,STX5,ZFAND5,GLE1,VPS28,EIF3E,UBTF,TNFSF12,LRIF1,LSM6,ALAD,PPM1G,PDCD11,MAPRE3,ZMYM2,CDK11B,NAT1,PHF6,MTA1,PSMB7,AKAP8,ARSA,CNOT10,PRG4,SELENBP1,LAS1L,SRP72,GALK1,SEC14L1,FHL1,AP3B1,CPA3,BRK1,RBM17,SNW1,RNF7,I…
0.00169346679858084	CSNK2B,NRBP1,PPP1CC	GOLGA3,AAMDC,MFAP4,UTP6,TTN,SRP54,NHP2,PYGB,VCPIP1,SIKE1,PUM1,GATAD2A,CST3,COQ6,APOBR,CHAD,YTHDF3,BLOC1S3,MELTF,BAG6,VAMP8,CLINT1,TXNDC9,PELO,C7orf43,CCT4,EIF6,PDE5A,HDGF,NCOA1,STIP1,SH3BGRL2,ECHDC1,SMOC2,NDE1,PPP1R14B,RAB3GAP1,ACTR1B,SLC38A10,THNSL1,CSNK2B,WDSUB1,POLR2F,TIMP1,ZC3H15,EEF1D,SUPT5H,SNRNP40,NRBP1,OCLN,CPSF4,EIF2S3,TDP2,UBE2A,ISCU,PC,AKR1C3,GSTM2,PHKB,CD14,MLST8,GCC1,RMDN3,CSTF2,LSM5…
0.00656493572270882	COPB2,COPG1,COPA	PNN,RBBP6,ARID1A,ELL,RBM25,ZC3H11A,ZC3HAV1,THRAP3,SON,DNAJC2,PPP1CA,PHYHD1,EIF3C,COPB2,SRFBP1,EIF2S3,RPS26,NKTR,EIF3G,RBM26,POLR2A,SUMO1,BCLAF1,C19orf47,NBEA,SRSF3,EIF5B,SARNP,RBM14,SETDB1,SRP68,COMMD3-BMI1,EIF1,GATAD2A,DTX2,ARMT1,STIP1,MAN2C1,SRSF7,RPS15A,SMARCA5,ZFAND6,KIAA1143,MARCKS,NDUFA13,PHF3,CAMKK1,NAA10,NFX1,SART1,PPM1G,RALY,BRD4,FAM32A,ZC3H15,LIMD1,TRAPPC4,MPHOSPH6,PCIF1,RNGTT,SLIRP,SNX…
0.0088930904705606	NUP93,NUP153,SUMO1,NUP88,NUP188	NUP93,NUP153,LSM6,DRAP1,WDR54,TATDN3,DYNLRB1,SETDB1,INO80C,CTNNB1,PAFAH2,LTBP3,ZNF668,UFSP2,KRT77,INO80E,WDR11,SNX21,IFT80,PMM1,RHOA,INSR,HIST2H2AB,NEU1,CRYBG3,NDUFA5,RPS2,CNBP,TPPP3,IK,RBMXL1,ELOC,GATAD2A,DDB1,AMPD2,PBLD,HUWE1,INTS5,LAMTOR3,GLUD1,CHGB,ACTR1B,RIPK3,SUMO1,MAD1L1,GSR,METTL16,CYR61,VPS39,GATC,KANSL2,CSAD,CMC1,NCBP2,LMAN1,UTP3,ACTA1,CUL4B,IFT22,TTC9C,FOXP1,SAR1B,AOX1,NUP88,RPRD2,POFU…
0.000354418116097741	NUP98,NUP153,NUP205,NUP62,SUMO1,TPR,LMNA	RRP12,WDR3,ZGPAT,PLAT,NUP98,SF3B2,SNTB1,H3F3A,MRPL23,LAP3,DAPK1,FAU,CELF1,ZCCHC17,NUP153,MORF4L1,GOLGA4,ALDH1L1,CD2AP,TOP2B,TMPO,FTSJ3,STK11IP,NUP205,NUP62,SRP9,RPL17,ZMYM2,TWF2,CST3,POLR2B,PDE5A,NAA10,DDX18,MARK2,NLE1,EIF4G2,MCM6,TBC1D22A,THOP1,SLC12A2,DNMT1,UTP20,BRD8,OGDH,NMT2,GCN1,STXBP1,INTS4,ADAR,ADNP,RFC3,SUMO1,DVL2,GPT,HNRNPUL2,TPR,MARC1,BABAM1,CUX1,MED8,SPTAN1,CDKN2C,IGFALS,ASH2L,RPA1,BS…
0.00211133919569408	NUP98,PPP1CA,C1QBP,SNW1,KPNA6,NUP62	PTBP1,ELOA,USP36,CWC22,RPS26,RBBP6,SETX,RPL32,ZNF787,RPL35A,NOP14,PRPF6,INTS12,VAMP8,NOL8,TRIR,C19orf47,ZC3H4,GATAD2B,CMC4,PPP1R11,EHMT1,BRCC3,CLCC1,COPE,PRPF4,CLIC1,DNAJC8,SMC1A,ZC2HC1A,PNN,SPTLC1,ZNF638,MARK2,SPINT2,BPTF,UBTF,PDS5A,MLST8,SRFBP1,ATP5B,ASNA1,PNISR,ZFAND3,LBH,ISY1,MARCKSL1,HSD17B10,MAD1L1,NUP98,SARNP,NAA10,RBM5,SCGB2A2,NAXE,COA6,ADNP,NT5E,CCDC58,MASTL,PSMD4,YARS,MRPL18,CCNY,EIF2S1…
0.0068687717844557	ILF3,RANBP2,NUP93,NUP205	CNRIP1,FETUB,TGM2,PI16,NAA15,GPX3,SERPINC1,CNN1,CRTC3,PRELP,CCDC102A,GSPT1,U2SURP,ECT2,PPIH,ACSS3,DCAF13,MYH11,TGFB1I1,C8G,SMTN,CTPS1,MBP,PUF60,GTF2I,CCDC97,F2,ILF3,CORO1C,MRPL51,NAA50,SERPING1,CSRP2,AFMID,RANBP2,SLIT3,HID1,CAVIN1,ORM1,CD209,BZW2,PXK,PDLIM7,CHERP,PTBP3,NUP93,SNX11,C3,EIF3I,COL15A1,FBLIM1,GATA3,COA7,HPX,TSPYL5,LAMC1,FXN,MPHOSPH10,LYVE1,RFC3,B3GAT3,PDLIM3,PROC,SIKE1,SERPINA1,SH3BP5…
0.00727692874448481	FBXO7,PES1,RHOA	NOL8,NDUFA11,SH3PXD2A,PURB,NOP58,HABP2,RBMXL1,MAP7D1,RPS29,MRPS15,TBPL1,COX6C,MAEA,FBXO22,BLOC1S5,NDRG3,ITGB1,GOLIM4,ZC2HC1A,NDUFS1,UQCRQ,NCBP3,NDUFA7,TCOF1,CRELD1,CHMP1A,ARID1A,CHMP2B,UBL7,CUL4B,SMG9,ZNF787,ZC3H18,YIPF5,HGS,ERCC5,PCNP,MYL12A,COPS8,VPS39,RFC1,FBXO7,WRAP53,CALD1,BRD1,CHMP2A,RPL18,SP3,PPIE,ZNF460,SDCCAG3,GNB1,C1QBP,GTF3C6,SURF6,PDS5B,RBM28,S100A10,MAP4,PES1,ELOA,ACTA1,RMND1,BLNK,AT…
0.0027516520270888	ZC3H18,OSBPL10,SAP18	ZNF787,SP1,ZFP91,EIF4B,PNN,MFAP1,BOD1L1,ACTA1,INTS12,SLTM,ZC3H13,TCOF1,THRAP3,SMC1A,NFX1,HGS,RPS10,DDA1,PRRC2C,WNK1,MAZ,ZNF460,NDUFS3,TRIR,RABGAP1L,SETX,UQCRQ,SFPQ,RPL22,GATAD2B,BRPF1,PCNP,CENPB,SRRT,SP3,SLU7,DNAJC8,UBAP1,SEPT7,ZC3H18,CAPZB,SELENOW,NFKBIB,SWAP70,SDF2L1,TSC22D2,SNRPB2,C1orf174,OSBPL10,C1QC,SNRNP70,SNRPA,MSN,TUBB4B,SAP18,SLK,RPL39,CRABP2,GRN,SUB1,DHX36,NSRP1,BRD9,SON,MTX1,ENO2,TAF3…
0.00169346679858084	WWP2,OTUD7B,PARK7	TBPL1,TWISTNB,UBXN1,RPLP2,MED25,TRAPPC12,PPIL1,UBFD1,CCDC43,RPRD1B,CPB1,STXBP2,NOL11,ADO,BPNT1,SNAP29,CDYL,UBE2V2,PPWD1,DOCK4,LSP1,PSMF1,HOMER3,APOOL,ABRAXAS1,MRPL11,LSM6,C2orf76,ERI3,BOD1,CCNT1,LCMT1,TDP1,TIMM29,PIKFYVE,EML3,C11orf84,ABHD14B,MFAP5,WWP2,NIN,ACTR8,RPP30,COQ5,RANBP10,HUWE1,TXLNA,MARK3,MRPL35,PTPN11,PKP4,FAM96A,TERF2,PMPCA,SEPHS1,PIK3CA,CFL1,OTUD7B,ESR1,DARS,FAM129B,CD55,ZFHX3,NIPBL…
0.00854121907456476	PALMD,BAG6	KANK1,PSAT1,RCCD1,UBASH3B,MYO1D,TIMMDC1,CRYBG3,ARHGEF5,CUL1,COPS7A,NCCRP1,TMEM30A,VAMP7,RAP2B,CIAPIN1,NUP153,TROVE2,REPIN1,POP4,RARA,WDR48,ACAD9,KIF1B,RNF31,CRIP1,PRKCD,PIK3CB,IMPA2,NT5C2,FAM49A,DHRS3,GPT2,CHCHD5,SPIN1,RIT1,C9orf64,WISP2,DSN1,HERC5,FLII,PALMD,PKP1,DOCK7,ITSN1,ALKBH4,RNF214,PEX3,TSPYL5,ELOC,PLA2G4A,PAPSS1,MYH10,MAD1L1,UMPS,KIAA1217,GATA3,IVD,BAIAP2L1,SLC3A2,FBN1,SLC38A10,RAB2A,LRP…
0.00351326567155774	SMAD4,HSPA8,YWHAE,CTNNB1	SEC11C,ADPRH,WDFY1,NAXE,CSAD,CPN1,RPL4,SNRNP70,SMAD4,UBAC1,RPS3A,YBEY,TERF2IP,NADSYN1,UCK2,GMIP,TMEM109,CD2AP,SBF2,TMOD2,PDLIM1,HSPA8,PBXIP1,MICAL1,PAFAH1B1,DMAC2,KCTD15,BBS7,DNAJC21,RFC4,DSCR3,MTMR2,REEP4,MEMO1,FUCA2,COPS5,GLYR1,RIF1,DOK1,NID1,MGLL,ZNF217,ACO1,SMARCA1,EPHB4,SPON1,NFYC,EPHB3,BCL2L1,CHD8,XPA,NONO,FAM213A,GALNT6,PARVG,ATP1A1,XRN1,INPPL1,YWHAE,FAP,TEX264,GNPDA2,NUDT2,MFAP4,SEC14L1,R…
0.00351326567155774	SMAD4,HSPA8,YWHAE,CTNNB1	SEC11C,ADPRH,WDFY1,NAXE,CSAD,CPN1,RPL4,SNRNP70,SMAD4,UBAC1,RPS3A,YBEY,TERF2IP,NADSYN1,UCK2,GMIP,TMEM109,CD2AP,SBF2,TMOD2,PDLIM1,HSPA8,PBXIP1,MICAL1,PAFAH1B1,DMAC2,KCTD15,BBS7,DNAJC21,RFC4,DSCR3,MTMR2,REEP4,MEMO1,FUCA2,COPS5,GLYR1,RIF1,DOK1,NID1,MGLL,ZNF217,ACO1,SMARCA1,EPHB4,SPON1,NFYC,EPHB3,BCL2L1,CHD8,XPA,NONO,FAM213A,GALNT6,PARVG,ATP1A1,XRN1,INPPL1,YWHAE,FAP,TEX264,GNPDA2,NUDT2,MFAP4,SEC14L1,R…
0.000705775705493432	DDX3X,SNRPD2,EEF1D,RPL12,SRP72,HNRNPA3,RPS2,MCM5,NONO,TRIM25,RBM10,PAN2,CUL1,EIF3E	SPAST,DDX3X,U2AF1,EIF4G1,KCMF1,CHERP,DPY30,RANGAP1,IGFBP4,SNRPD2,EIF3I,COLGALT1,EEF1D,CSAD,SKIV2L,ENTPD5,RPL10A,ECHDC2,LPXN,PLCB3,NFKBIE,CXorf38,SCGB2A2,RPL12,ACSS3,POLR2F,SRP72,CHTF18,NAA10,TRMT1,SYF2,MED19,USP10,HNRNPA3,CBFB,MTA1,UBE2O,SF3B6,DR1,RPS2,NHP2,RPS17,NDUFAB1,EIF4E,INTS1,MCMBP,DMXL1,TRA2B,SH3BP1,TXNDC9,MRPS17,DCAF13,ATF7IP,ARMC6,NAA15,MCM5,SORL1,RPS12,MCM3,CASP3,NONO,POLD2,SF3B3,GARS,…
0.00184555072030479	WDR33,CSTF2,PLRG1,SNW1	SERBP1,PRRC2C,SNRNP70,SFPQ,SAFB,ZC3H18,WDR33,YBX1,TSC22D2,TXLNA,POLR2J,SRP68,YIPF3,SAFB2,ATRX,RPS26,MINK1,SEPHS2,RBM10,ZNF451,NUDT16,FCER1G,ACIN1,ZNF598,ELL,PNN,NCOA5,CSTF2,ZC3H11A,KIAA1143,RPS10,YARS,HMGB2,SRSF4,PLRG1,DIABLO,SON,CDK5RAP3,CHD4,NAA10,EIF1AX,ZNF579,CD14,STRBP,SH3PXD2A,RBPJ,CUL4A,DIS3L2,ATF2,INTS1,ITGA6,SNW1,NUDC,PTPRJ,KAT8,BCL2L1,DDAH2,GTF2H1,CNOT9,MED26,MAX,ACAA2,AMBP,BAIAP2,NIN,E…
0.00698810734359967	NEDD1,CEP97,CEP131,YWHAZ,NAV1,EXOC8,MED4	AK3,STXBP1,RALGAPB,AKAP8,NRP2,FUCA2,NEDD1,THBS3,VIRMA,ARAF,SF3B4,ZC3H8,PPP4R2,POLR2H,AP1G2,SFXN2,RFC3,METTL14,HMG20A,GNAQ,FAF2,METTL15,ACBD6,CMSS1,DPH6,IDI1,SMG8,NCOA1,PROC,RNF2,ACAT1,DPH5,SERPINE2,RCC2,ILK,SRSF9,BCL7C,THBS4,MRPL51,HOMER3,LAMA5,HIST1H4A,GDAP1,YEATS4,CEP97,EIF4A3,CFH,CAPZB,UCKL1,DDAH2,PGAM5,ATN1,PTGS1,PPP1R8,GIGYF2,SBF2,CDV3,PLAC9,CCDC115,CTSH,CSF1R,CEP131,SRPX,ARHGEF5,HOPX,JCHAIN…
0.00139271330544767	PNN,PHF5A,SARNP,SRRT,CHCHD3,ILF2,AGTRAP,FUBP3,WTAP,IMMT,ZC3H14	GATAD2B,RBM14,MARK2,PRRC2C,MAEA,NDUFA7,PNN,ATXN2L,PHF5A,SARNP,SUMO3,ZFP91,USF2,TBCA,RACK1,RBM6,PSMD9,CLTB,HDDC3,SMC1A,SRSF3,EIF2S3,SDE2,YBX3,KLHL11,SRRT,TCOF1,RPS27L,TMEM189-UBE2V1,RPS19,CHCHD3,CNOT7,CNBP,STIP1,RUFY1,ZRANB2,RSRC2,COX7A2,MTIF3,FDX1,ELL,ILF2,SLC12A2,COX5B,CMC4,PDAP1,RPS5,PTPN18,DCTN1,PSMD7,GGA3,AGTRAP,TACSTD2,FUBP3,ATP5A1,ARPC3,UBE2F,RPL26,ERCC5,CMC1,PDLIM2,WTAP,ITFG1,EXOSC6,RBCK1,…
9.70656932874603e-05	PHF5A,SRRT,EIF3A,RPL28,WTAP,RHOA,SARNP,CWC22,PNN,ACIN1,RPL32,MRPL23,SRP68	SDE2,PHF5A,EIF3C,EIPR1,SRRT,AP5M1,ISY1,PRRC2C,RPS11,RPS26,RPS20,MARK2,EIF3K,MAEA,MFAP1,NCBP2,CLTB,MED18,EIF3A,MYL12A,PPP1CC,FNBP4,ELL,C1orf50,RPL28,NDUFA7,TCEAL3,EIF4EBP1,RPS29,LRPAP1,MYL9,WTAP,DOHH,ADO,RANBP9,RHOA,SARNP,GSTM5,ATP5E,RPS18,CWC22,NOL8,RPS15A,C17orf49,DUSP3,ARID1A,ZNF787,CPNE2,PPIE,ABRAXAS2,PNN,BLOC1S3,RPS19,DDA1,ACIN1,EXOSC6,TBCA,ZC3H13,LBH,POLR2E,MYL6,GATAD2B,SCGN,RPL18A,DNAJB12,R…
0.00458254697674471	PHF5A,SRRT,SERBP1,RPL32,PPP1R2,ZC3H14,PNN,PABPN1,CHCHD3,PDIA3	SMC1A,ZFP91,CHMP1A,MAX,RPL29,SP1,PHF5A,SRRT,TMEM263,SLTM,MARCKS,ZC3H13,TCOF1,MARK2,RPS26,CLTA,SCAF8,CPS1,HDDC3,SAR1A,EEA1,VAMP8,RPS20,COX17,SERBP1,FEZ2,YLPM1,MINK1,RBBP6,PPIE,CBLL1,TBCA,BOD1L1,RPL32,PCBD1,CSN2,NDUFA11,NOP14,RBM25,ZC2HC1A,ARCN1,GID8,PPP1R2,RABGAP1L,NDUFA7,RTF1,ZNF24,MRPS18A,DCP1A,HPCAL1,PPIL1,GPATCH8,ZC3H4,ZC3H14,RBM33,RPS18,SPATA5L1,ATXN2L,PNN,REPIN1,LUZP1,MIB1,CENPB,RAP1B,IRF2,D…
0.00541509731314145	POT1,PDLIM2	SUMO3,ZFP36L1,ZFP91,MAEA,PPP1R12C,SETD2,GATAD2B,MARCKS,TPRKB,RPS19,CHMP1A,RSRC2,PPIE,BOD1L1,RBM14,SMC1A,SMAD5,GATAD2A,HSD17B10,GID8,NDUFA11,EIF4EBP1,DPH5,TMEM263,HDDC3,EIF3M,THRAP3,RPS26,SNRPE,AZI2,PPCDC,CHCHD3,ZBTB14,TMSB4X,TRAPPC4,ZFAND6,GPATCH8,MARK3,PCNP,RBMXL1,UBL5,ZNF24,EIF3A,RPL35A,GPX1,FNBP4,HSPB11,SUMO2,FOSL2,MAP4,GTF3C6,CLTC,SUDS3,RWDD1,TMEM189-UBE2V1,GPX8,CNOT7,SNRPF,MED23,POT1,GNG2,TA…
0.00114376916612455	TPRN,MPRIP,PDLIM7,TPM1,TPM2,MYO5A,LPXN	LGALS1,TGFB1I1,ALDH1B1,MYLK,DVL2,VCL,CNN3,TPRN,MPRIP,PDLIM7,PLS1,STK17B,SORBS3,SNX18,VIM,TPP2,LRRC15,RIPOR1,MRPL16,ARHGAP32,TPM1,FUCA2,TTC39B,ETFRF1,PDLIM2,NAXD,FHL3,SRP14,FOXRED1,SLC12A7,FSCN1,FLNC,FGF1,DDRGK1,PIN4,PTEN,PLS3,ADSL,WASL,CCT3,COL11A1,RBMS2,TPM2,FAM160B1,MRPL17,FBLN1,PCF11,RCN3,PQBP1,STXBP3,BCR,FTSJ3,COLGALT1,POFUT2,SVBP,RAB31,PXK,MYO5A,HAUS4,MAPRE2,MUC5B,F11,MRPL37,ETFB,ITGA5,UBR1,…
0.00556181584302135	LUZP1,NDUFA7,SNW1,PDLIM5,MYH9,PALLD	MSRB3,MXRA5,SULF1,RPLP0,TMEM189-UBE2V1,CNN3,COL11A1,ATP5B,CNN2,PPP1R11,CSRP2,EEF1A1,INTS12,PPIE,SEPHS1,PPP1R12C,NOTCH3,CDKN2AIP,MED9,LUZP1,CHCHD3,TG,LTBP3,FHL3,ITGA11,YWHAH,PPP1R13L,POLR2M,PPIL1,ZC3HAV1,CNOT7,HSPA8,ACTB,RPS20,ERC1,MITF,NDUFA7,SNW1,SRCAP,PPIA,ARL6IP1,OPTN,PPP1R12A,VGLL4,CFP,EIF3G,ANAPC4,DAP3,PDLIM5,PRPF19,GLRX,MAP4,ZFP36L1,OASL,CD4,FGD3,EPHX2,MYH9,ZC3H15,PALLD,LMNA,TIMELESS,NCOA7,…
0.00295595877741064	DDX24,PRPF40A	EPB41,RPL18A,GOSR1,ENSA,THBS1,DDX19A,EIF3K,WNK2,IFI16,USP16,CEP68,IVNS1ABP,DIS3,EIF3L,VPS51,POLR3E,PSMG2,RPL6,LRRFIP2,C19orf66,ATP5L,PSMF1,MED27,NFKB2,PPM1H,TBL1XR1,PSMB9,CTCF,ARMT1,SRSF3,MAP7,MCTS1,AP1G2,LPXN,TBCD,PPP3CC,PPP1CC,HIP1,DLST,TEX2,PHGDH,ARAF,ZBTB8OS,RIOX2,PPP1R9A,NAPG,PARVA,SYF2,WFDC2,PRR36,RBM26,PMM2,TOMM34,CYB5R2,HAUS1,TAF1,FLOT1,JPT2,FBXW11,TAF4,OTULIN,NEDD1,TMEM63A,TXNDC17,RXRA,C…
0.00317701773122857	SARNP,POLDIP3,PFKFB2	RPS26,RPS11,GATAD2B,SARNP,EIF2S3,PRRC2C,ZC3H14,RPL32,ELL,SRSF3,ISY1,RBM14,SUMO1,PPP1R11,RPS19,SRFBP1,REEP4,CMC4,POLDIP3,SDE2,C19orf47,MARCKSL1,MARK2,NMRK1,TXLNA,SRRT,SUMO3,NDUFA7,SMC1A,PTBP1,CLTB,MRPS15,CTSD,RNF113A,LBH,CUL4B,FKBP15,POT1,EIF3A,TMEM189-UBE2V1,KIAA0907,TRAPPC2,GLUD1,RPS29,RUFY1,RTN3,DNAJC1,MLST8,IK,MRPS12,FCER1G,CHCHD3,CUL3,PARD6B,STK10,PFKFB2,MRPL46,RPL35A,DHCR7,ZC3H7B,F11R,ZNF579…
0.00022744790610134	PGM5,GPI,HSPE1	PGM5,CAVIN2,CAVIN1,HSPB6,LAMB2,FHL1,MYO1C,CAVIN3,GPI,MYO1D,OLFML1,CNN1,CNRIP1,AKAP12,STAB1,BPI,BST2,NDRG1,VCAN,APOO,YPEL5,RPL35A,THY1,HLA-DMB,PABPC1,TARS,RPL13,GANAB,TARBP1,ANAPC2,TEP1,WDFY3,CPEB4,PECAM1,TERF2,TCERG1,LAMA2,VTN,TRAF7,ZFYVE26,WASHC4,CPSF1,HSF1,LCLAT1,ARL6IP1,S100A12,SCAMP2,PKP3,CFAP36,HSP90AB1,LYZ,CCAR2,THYN1,RERE,EEF1A1,GALC,TAGLN,RPS11,ENTPD1,RPS21,SKAP1,RPL32,ZC3H7B,CCDC92,LIPE,…
0.00414337126977096	IFIT3,RAD21,TRIM25	DPP8,SDCCAG8,SLC16A3,YLPM1,GHDC,IFIT3,MED24,PHGDH,GOSR1,FBXO38,CCDC50,GPATCH1,CCDC102A,COPS7A,NDUFA11,CSAD,BCAT2,BID,SUCLG2,USP15,MX2,CFL2,C7orf55-LUC7L2,SFRP1,NIPSNAP1,RAB32,EPB41L1,NDUFB8,ZNF217,ENDOG,MBOAT7,AFG3L2,ATP5F1,RPL4,PHKA1,PRKRIP1,INPPL1,IFI35,PTER,OAS3,MPI,HEATR5B,PTPN9,COL5A3,TMEM11,FGGY,PRIM1,AHCY,ACBD3,PTPMT1,RANGRF,LPIN1,ERI1,MAPRE3,SDHA,GGACT,PEF1,PPL,SHKBP1,UBE2T,ZNF598,LPIN2,P…
0.00322903126518004	PHF6,CHD4,RPS25,PIP	PHF6,ZNF638,MARCKSL1,MFAP4,EIF4G1,SON,CUL4B,NUP93,MRPS25,TPP1,TOP1,KIF5B,UTP18,EIF3C,SF3B2,DDX3X,GNB1,APOH,SF3B1,RBBP6,THOC2,RXRB,LEO1,GPX3,RPL12,TRIM33,EXOSC10,MRPS15,SRPRB,ANKS1A,EDC3,CRYL1,ISG20L2,HSPA12A,CHD4,PGM5,RNF113A,MARC2,CDC73,ABCF1,ZFR,THBS4,RBM26,ULK3,KPTN,RPS25,DERA,ELOA,SART1,DNMT1,RRP1B,TSR1,UTP14A,SRPK1,MTG1,SERPINA7,CISD3,UBE2G2,SULT1A1,CCDC186,ADAR,RBM45,BRMS1L,PCF11,MRPS22,RPS…
0.00632394556442281	AP2M1,ITGB1,AP2A1,FERMT2,UNC13D	WASHC4,LOXL1,CNN2,COL11A1,LRRC15,DRAP1,COL12A1,MXRA5,TAF7,THUMPD3,CAPZB,SGTB,ANKHD1,LCMT1,RABGGTA,CENPF,MRPL24,AP2M1,PKN1,GLIPR2,FAM96A,RAI14,SEC31A,AKT2,UBE2Z,ITFG1,COMMD6,NME1,SORD,EDC3,NBAS,ERAP1,UBE2V2,MTMR12,ITGB1,LSM5,EIF3J,SYNRG,VPS11,AKT1S1,ATXN3,METTL3,TOMM22,TAF5L,WIPF1,RAF1,AP2A1,ATG7,FERMT2,EXOC8,NGRN,STK24,STAT2,CNN3,FILIP1L,IFT172,KCTD12,COMMD5,MYD88,WDR41,ITIH3,ARPIN,POLR2L,PALLD,D…
0.00224852739168142	PKP2,CTNNB1,DSG2,JUP	PKP2,HERC2,CTNNB1,TIMM44,DSG2,HMGB1,ACTR5,MAD1L1,GMEB2,CALCOCO1,NAT1,ASPM,CNPY4,SGSH,MAP3K6,AHNAK2,SP140L,TAF4,KCMF1,VGLL4,TNS2,PLCB1,PTK2B,BBS2,SNX11,DHX35,ABHD5,HSBP1,MTA2,NUP93,PACS1,CPXM2,GTF2I,PRELP,ATP2C1,MTA1,HSPA12B,CSAD,TYK2,KIN,PAG1,SEC11A,PTMA,THNSL1,SETDB1,TSEN34,CD55,RTKN,NCAPD3,KIAA1217,LRP2,BUD31,BANF1,ELMOD2,EMC2,COMMD2,ME1,SETD1A,STIP1,CTSG,LAMP2,EIF3J,CNBP,NDUFA12,NBR1,ABCB6,SLC…
0.000216989376110629	PKP2,CTNNB1,DSG2,RNF31,JUP	PKP2,PPA2,OAF,RPS6KA4,ACSS3,CD59,BET1,PCMT1,TRPT1,REEP4,SRP19,GFRA1,PPP2R5A,RPS16,SEC13,PPP2R3A,SLC35E1,CORO7,ASAP2,PLCB1,DCLK1,ATP2C1,LAMC1,TTL,RRM2,MRPS24,TRIP6,CTNNB1,AHNAK2,LAMP2,ZCCHC8,RUNDC1,DSG2,WDR92,LAMTOR1,F5,NDUFA5,ITPKB,SPTLC1,GALNT2,PSMD12,SYNC,SMYD2,SUN2,BUD13,PPP2R5B,RNF31,SLC44A1,FAHD1,F11R,KIF13A,SMAD1,CCDC28A,DOCK10,TRIM36,ITGAL,TNFAIP6,ELMOD2,GNAI3,ECM1,METTL15,LIMD2,WDR82,SUPT…
0.00224852739168142	PKP2,CTNNB1,JUP,DSG2	PKP2,HNRNPM,EHD3,SPINT2,CTNNB1,NONO,BBS7,SARM1,MAD1L1,CTBP1,ZFHX3,POLR2A,JUP,WNK2,SNRPA1,ARAF,SOD3,AFG1L,MFAP4,RALY,CSTF2T,GSTM4,SMOC2,BUD13,TNS2,STIP1,CRMP1,UTRN,PRELP,ZMYND11,CBFB,HOOK2,LSR,AIMP2,DCAF8,BUD31,THUMPD1,RTF1,RBBP6,BIN1,BCAR3,PDS5A,TTC9C,CPEB4,SERPINA7,PCMT1,NOB1,HUWE1,PSMD4,SNX9,AP3M2,RBM26,MTR,AOC3,PODN,GNL3,WIZ,ING3,SGTA,DHX40,GFRA1,FBLN5,PPP1R14A,RAD50,WASHC2C,MED8,AK4,HEXIM1,PO…
0.00184555072030479	JUP,RPA3,DSC2,DSG2	NOLC1,RPL26,GABARAP,NPTN,TRIR,HDGFL2,SAFB,TRAPPC4,ZNF330,RPL28,SCAF11,NUDT16,HMGN2,C19orf53,PGLS,PNISR,MRPL30,CHMP5,CHMP2B,ZC3H18,ZNF24,ARL2,MAP7D1,RGS14,ACTBL2,NDUFC2,GABPB1,RPSA,JUP,CHMP1B,RPA3,CASC3,PEA15,ARGLU1,SNRNP70,AP3M1,STAM,MARK3,CHMP1A,EIF4B,CCDC86,RABL2B,SRSF7,SLC16A3,NFX1,ARHGAP31,EIF3A,PCNP,ZFAND6,ALKBH4,RAB5A,ECE1,DSC2,CBX1,PSMG4,PRKAA1,PGM2L1,DCLK1,PCMT1,XPC,ZC3HAV1,TRAF2,DNAJB4,C…
0.00184555072030479	CTNNB1,DSP,PKP3,JUP	RANBP2,BTN3A3,MAIP1,KMT2C,VGLL4,CTNNB1,PDS5A,TRPS1,RIC8A,DSP,AFG1L,SMC3,RAPH1,SERPINE2,NUP93,REPIN1,MAD1L1,TIMM29,ZMYM4,ZC3H13,PIP5K1C,FKBP2,PKP3,PTPMT1,NUP88,CHMP4B,VAMP8,SNX5,CLYBL,MPHOSPH6,POLR2H,NDUFA2,PNN,WEE1,CMPK2,CELF1,CWC22,GTF3C6,NDUFS1,INTS6,SIN3A,GGT5,MTA1,VTN,ZNF638,KLHL42,VAPB,CASP10,PABPN1,MGA,IFI44,ALDH1L1,CYP27A1,CDC37L1,SMAD2,RALBP1,SEPT1,STEAP4,COX6A1,DVL3,CYP51A1,PRKACB,SNRPG,…
0.00184555072030479	PKP3,DSG2,DSP,JUP	PKP3,DSG2,DPY30,DSP,SNRPD3,TIMM29,PPP4R1,HIST2H2AB,IQGAP2,ECHS1,JUP,NRF1,SBSPON,THUMPD2,SUMO1,URGCP,CYHR1,BPIFB1,SRSF1,ENOSF1,SPTLC2,AMPD2,XRCC4,SNX11,SEC13,STARD5,RSBN1,ALDH1L1,RUSC1,MAD1L1,PCYT1A,PFDN6,OXSR1,RAB35,SMARCE1,SLC25A22,CNOT2,EPS8L2,MIEN1,CPSF4,EHMT2,FAM96A,ATG12,SNRPA1,YTHDF3,CPB1,U2AF1,TTPAL,SPINT1,NAT1,SMARCAL1,BUD31,SVEP1,LRRC47,TTC9C,PODN,SON,SLC25A24,INTS13,MUT,SLIT3,DHX29,ZFYV…
0.00184555072030479	DSC2,CTNNB1,PKP3,DSP	DSC2,VTCN1,AMPD2,ADAM10,LENG8,MOGS,ATP2C1,CTNNB1,NSDHL,ASL,HSD17B12,WDR11,MLEC,ITPK1,PKP3,MARC1,NUP205,RNASEH2C,MSI2,CANX,NFATC2,AGTPBP1,CEBPB,HEXA,CASP9,TNFAIP8L2,TACSTD2,ZCCHC6,DSP,PRKAR2B,HUWE1,RRP8,OSBPL9,WDR43,F11R,CD59,TPR,CXCL12,PTGDS,PLIN1,MCC,MYBBP1A,ATP2B4,LUM,FBXO4,USO1,NHLRC3,ATP1A1,LYVE1,AKAP11,FBXW2,TFF3,RPAP2,VASP,BET1,BUD13,F5,CUL1,GBP2,PABPN1,AKR1B1,RABGEF1,PRKAA1,GLCCI1,GALNT1,A…
0.00689728285801005	PLEKHA6,PLEKHA5	PITPNB,NANP,RABL3,PLEKHA6,DGCR8,APAF1,SLC25A24,DOCK6,DDX60,PALD1,DPH6,BLOC1S6,PA2G4,ATP6V1H,XPO4,PGRMC2,PLEKHA5,ARHGAP9,NDUFAF1,HAPLN3,AUH,MAP1S,TRNT1,COX1,LCP1,IL18,REXO2,ACAA2,HELZ,PPL,BBS1,SEPT1,FOXO3,LYPD3,SCAF4,CDK11B,APOBEC3F,TRA2B,ALDH4A1,OPA1,SMC6,CHTOP,HERC5,NOVA2,TMTC3,DNAJC3,SDHA,ANXA4,MRPL22,GLUL,SLC44A1,COMP,PUS7L,HPRT1,AIFM1,LETM1,SRGAP1,REEP4,PARP2,RIOK3,XPO7,HTATIP2,GTPBP6,IRF2BPL…
0.00689728285801005	CTNNB1,PLEKHA6	ATP5D,CSN2,EIF3C,ATXN2L,CTNNB1,CUL4B,EIF1,PLEKHA6,AIDA,TPRKB,ROCK1,EIF1B,STXBP5,CAPZA2,FCHO2,LALBA,NUDT16,SMARCA4,CUX1,EPHX2,GABARAP,KNOP1,NAA10,TAX1BP1,ENO2,MED21,SAFB,NOLC1,TATDN3,SRSF7,YBX1,PPM1G,ATRX,NDUFB5,LIN9,NFATC2IP,BPIFB1,FUT11,ELOC,DTX2,UTP18,SUMO1,C11orf54,SRSF4,RPL26,WDR45,LBR,NSDHL,BLOC1S4,KIAA1143,PSME1,HMGCS2,PTPN12,POLRMT,RPA2,TTC28,TTL,ROMO1,TOMM5,MCAT,MLST8,CTNND1,KIF3B,SETMAR,…
0.00689728285801005	CTNNB1,PLEKHA6	SUCLG1,PSMB3,PPHLN1,ZC3HAV1,PRRC2C,ZBTB20,ZFAND6,ATRX,CAAP1,ATXN2L,YBX1,WDR11,RPSA,EDF1,UQCRQ,RGS3,ZNF638,GATAD2A,ZFAND3,CD59,KIAA1143,PIP,NFX1,AP5B1,AKAP13,MICALL2,OLFML2B,UBL5,TRAFD1,RERE,TXLNA,CRIPT,CARTPT,DCAF5,ZNF460,ACTA1,NUDT16,CLIC1,SRSF7,ZCCHC6,ANKS1A,APC,GNB2,RBBP6,CHMP1A,PHF14,PCBD1,NUDT14,SETD2,EXOSC5,CTNNB1,PLEKHA6,VPS13C,SPINT1,SNX9,PRKAR2B,DNAJC10,DCAF8,ATP2C1,HEXDC,EPCAM,THEM6,PDE…
0.00689728285801005	PLEKHA6,MED9	CARTPT,LBH,TBPL1,TOR1A,PLEKHA6,ELOA,RPL28,DBNL,PTBP1,RPL18A,SUMO2,PPIL1,RBM14,NDUFA7,RPS26,TXLNA,PPCDC,TRIR,ELL,VCAM1,PMPCB,RREB1,SMC3,YY1,TCEA1,UBQLN2,SNUPN,CHMP4B,SAP130,FTSJ1,EIF1B,PRRC2A,DOHH,EIF2S3,RSRC2,RPL32,CHCHD3,CDKN2AIP,LSM6,RBM6,MED21,HMGB2,DCP1A,KDM6A,ISY1,DDB1,SRSF4,ZNF787,MED9,RPSA,REPIN1,RPS11,C19orf53,SMIM12,ZC3HAV1,MBD1,CASC3,ATG4B,GRN,TCEAL4,SRSF7,PCMTD1,PITPNC1,RBM25,MAD1L1,MT…
0.00689728285801005	PLEKHA6,CTNNB1	PRR12,RPS5,DCP1A,FCHO2,SLK,TXLNA,FBXW2,DBNL,PPM1G,VCAM1,EFS,RPS21,CD14,SAFB,ZNF638,SRSF7,BRMS1L,AIDA,CSF1R,MYL12A,PLEKHA6,BOD1L1,SH3BGRL2,CHAMP1,ACTN1,RRP9,SNX9,ARGLU1,GLRX,SLBP,TG,SCAF8,CARTPT,ZNF330,S100A10,WDR45B,CUL4B,EIF1B,ENPP2,GPX1,HUWE1,COPE,AAMDC,TTF2,SCAMP1,ESD,REPS1,ATXN2,COMMD4,NFATC2IP,PLTP,JAK1,CMSS1,CHCHD3,MRPL13,GCHFR,DCPS,COPS5,STAM,CTCF,LBH,MGA,GNPTG,EIF3C,GID8,RREB1,RPL26,DPT,C…
0.00689728285801005	CTNNB1,PLEKHA6	PPP1R11,UBN1,UBA2,CTNNB1,HOOK2,PMF1,MED21,TRAPPC2,RBBP6,FCHO2,HDDC3,PLEKHA6,ARL2,PGAM1,CREB1,EIF3C,ACTA1,MARK3,CSN2,JMJD6,PDE6D,NDUFA7,CHCHD3,RAB1A,CBLL1,SCAF1,FPGS,MARK2,ACOT13,SH3BGRL3,PSMB4,LALBA,RACK1,FBXO22,PRR12,LSM5,RTF1,TOMM5,SON,ARL6IP1,YBX3,WTAP,CUL4B,ELOC,GDI1,POFUT1,PSMA4,SNRPE,LIN9,EPS15L1,TPRKB,PGRMC1,WDR45B,CHMP5,MRPL17,MAP7,VAPA,MLST8,PTAR1,TSPAN15,KATNAL1,PVALB,MRPL50,RBPJ,SAP30B…
0.00106160122782453	CGN,PLEKHA7,DCLK1,RTKN	ELOC,F11R,SMC1A,DPY30,GOSR1,SRSF9,DIABLO,ZNF326,CHCHD3,CTNNB1,MSRA,SMC3,CGN,CPXM1,SNX3,DR1,MAD1L1,TP53RK,RSRC2,INTS9,COX7A2L,CLIC2,AIMP2,MEPCE,PLEKHA7,PGAM5,CYCS,IGLL1,TBC1D10B,CPN2,CDK7,ELAVL1,ITSN1,TRPS1,THOC6,SRRT,SLC4A1AP,NELFB,FKBP14,TUBB2A,SNRPD3,CFHR2,RANBP2,ZMYM2,NSUN4,DDX56,IK,VPS36,SKAP2,AOX1,SLIT3,TTPAL,MRPS25,COX20,EPS8,CNBP,TPRKB,DCLK1,APOC3,NBAS,ALDH5A1,CRISP3,SUPT4H1,RBM10,NCBP2,NU…
0.00883361204294807	PLG,C7,F10	PLG,FGA,CFHR1,SAA2-SAA4,C7,MMRN2,F10,C8B,NIN,KLKB1,ITIH2,FAF2,RANBP6,SERPIND1,MMRN1,SMYD3,MBL2,HSPA4,NSUN2,SAR1B,DNAJB12,ITIH3,C4BPA,PECAM1,AFM,MST1,C8A,DENND4B,CPN1,AGL,RBL2,SRPK2,CAPZB,HIST2H2AB,ANKRD50,FDFT1,COPB1,CD99L2,CD59,ERCC5,TRAF2,TUBB2A,BSDC1,CAMP,CTSH,IPO5,GMPPA,MRPS31,CCDC102A,LIN37,POLG2,MICALL1,LAMB1,SUDS3,MAP4,FARP2,PPP4R2,GCHFR,CHD4,ADAR,SLC44A2,NUDT12,PAFAH1B3,ELOF1,HAPLN3,VTN,T…
0.00120485600400094	LIPE,ABHD5	GBE1,PC,APOD,PFKFB3,DCTN6,PEX3,STT3B,JUNB,DMTN,PYGL,KANK2,SCO1,CWF19L2,TACC1,ATAT1,EIPR1,WDR92,DLD,NMT2,INPPL1,PLIN4,IQSEC1,ETV6,AUH,AKR1C2,ACAD9,PRPF4B,USP32,CAVIN2,RPL13A,MYO1C,PDIA4,NCOA6,ASAH1,NDUFB1,RBM7,KANK3,LRPAP1,ERCC2,SLC25A11,LIPE,RPL6,STXBP1,VPS35,SDC4,COX20,TERF2IP,NDUFB8,EMILIN2,XPO1,FMNL1,COMT,RPL7A,PLD3,VDAC2,WISP2,FKBP5,MRPS21,ARID1A,GTF2F2,AOX1,CD9,CARHSP1,ABHD5,BPI,STX5,CCDC88B…
0.00120485600400094	LIPE,PLIN1	DCTN3,CCDC93,CAVIN3,EEA1,PPP1R11,MED21,PPP1R12C,STAB1,YME1L1,AOC3,PDIA6,FABP4,PLIN4,RPL32,STK10,SARNP,MFAP5,PPIL1,EHHADH,MECP2,EPB41L2,ALDH2,CNOT7,BTK,ITGA2,SAR1A,PTBP1,ATP5B,GAPDH,RABGAP1L,RPL29,RPLP1,NUP155,MZT1,HSPD1,DNAJC19,FBXL18,RSBN1,TBCA,DOCK9,CHMP4A,AASDHPPT,PYM1,SLU7,RPS21,DCTN5,FPGS,RPL13,MRPL2,ASAH1,GPT,LIPE,RTF1,CD163,BRD8,CD36,RMND5A,ATP6V0D1,GM2A,CHAMP1,EIF5,GGA3,EFHD2,PLIN1,TXLNA,…
1.14146304895733e-05	PLIN1,ABHD5,LIPE	PLIN1,PLIN4,AOC3,CD36,ABHD5,FABP4,GPD1,LIPE,FAM20B,ACAT1,NID1,EHD2,FHL1,PPP2R5C,LAMC1,LAMA4,AKR1C2,LAMB2,CAVIN3,HSPA12B,PFDN1,ITSN1,MED17,GSTO1,HLA-DQA1,VPS72,LSM6,MED20,TWF1,FSCN1,PRKCI,ATP6V1E1,COMMD5,GOLPH3,EPB41,STEAP4,MTM1,SKAP2,MOV10,NABP2,PLXNB2,FUS,EMILIN1,SERPINB9,STRAP,YEATS4,LRP2,ANXA9,KIAA0907,TAF10,NEO1,PDF,SRSF5,TM9SF1,LAS1L,GBE1,NSUN5,SH3BP5L,GLO1,BAG6,S100A12,POLR2F,PTK2B,S100B,US…
0.00120485600400094	LIPE,PLIN1	PLIN4,CAVIN3,FHL1,LIPE,AOC3,PRKAR2B,EPB41L2,PNPLA2,PLIN1,HMG20A,CAVIN2,STAB1,LDHD,HSPB6,GSPT2,HSPA12A,DCTN3,C2CD5,MAN1B1,GPI,BLMH,EHHADH,MBP,ING1,FABP4,CDC42,CTSC,WASHC4,ARIH1,MARC1,TPD52,MTMR14,PALMD,TUBB4A,PLEKHF1,DEPTOR,APOO,POLR2I,CKMT1A,RAB3D,PFDN1,PSMB6,NDOR1,NUDCD1,GRB2,LSM2,YIPF3,ARL6IP1,PNO1,ELANE,PRPF18,HCLS1,LTF,PPP1R1B,CCP110,PDIA6,MFAP5,PHB2,IRF9,NFATC1,PPIC,FAM118B,NUBP2,FBXO18,TSR2…
1.14146304895733e-05	LIPE,PLIN1,ABHD5	PLIN4,AOC3,FABP4,AKR1C2,LIPE,CLSTN1,INPP5K,PLIN1,VPS41,FRZB,AGRN,COMMD2,RPRD1B,CCL5,WASHC3,FAM45A,FHL1,YAP1,LRRC15,BLMH,SLC25A20,ZNF830,CASP6,MAN1B1,C11orf84,PARVA,PLXNB2,HSPB6,EHD2,SZRD1,EFS,MAMDC2,LOXL1,ACADS,EEA1,IKBIP,AP5S1,DLGAP4,C1orf123,ADA2,CEP57,STK11IP,SAMHD1,STAB1,USP5,COQ5,ETFDH,EZH2,ZMIZ1,COMMD8,BCL10,ABCF1,FAM96B,ABHD5,PACSIN3,F9,BCAT1,CORO7,LSM2,MDK,EEF2,GAK,GNA11,RNF7,C7orf55-LUC7…
0.00120485600400094	LIPE,PLIN1	PLIN4,FABP4,LIPE,ACSL1,PLIN1,LIN37,GPD1,AOC3,RASIP1,PRKAR2B,DOCK11,VPS13B,PYGL,MBL2,PNPLA2,APOBEC3F,MRPL35,CD36,PHF23,RBM15B,LDHD,BRD7,HMG20A,EHD2,TMEM230,ACSS2,GNG2,NUF2,USP34,TM9SF2,PC,ASAH1,DPP7,CARD14,ARL8A,PI16,ARL2BP,TXNIP,NAA35,TPP1,LARP1B,RCOR3,MRPL43,GANC,INPP4B,CADM4,MLYCD,TRAPPC3,RMDN3,ING1,G6PD,POLR3D,GGA3,TACC1,KTI12,HSPB6,ITGA2,PRIM1,RTL8C,CORO2B,SEPT9,MDH2,RPL13,SKAP2,CALML3,PCYT2,…
1.14146304895733e-05	PLIN1,LIPE,ABHD5	PLIN4,FABP4,PLIN1,FHL1,LIPE,URGCP,AOC3,ABHD5,ERBIN,LGMN,MUC2,PAFAH1B1,EHHADH,RPRD1B,HSPB6,NOMO3,AKR1C2,ZNF830,ACAA2,EHD2,CES2,DAB2,OGFR,CADM4,FBXO30,CORO7,PHC2,SCGB2A2,CD74,UBR3,CRYAB,OARD1,SIRPA,DAG1,IDH1,PRKAR2B,BABAM2,BEND3,ASAP2,MDK,AIFM2,CXorf38,SMG6,YWHAE,RPAP2,MIER1,PAIP1,CNPY3,LCP1,ARID4A,DDX20,MARC2,AGO2,HSPD1,SETD7,RAB23,SMOC2,ATP6AP2,LAMB3,MORF4L1,ACOT9,HEATR5B,UBR7,BRD8,PIAS1,WDR46,AP…
0.00120485600400094	PLIN1,LIPE	PLIN4,PLIN1,GPD1,FHL1,LIPE,ALDH1L1,FABP4,CAVIN1,GALT,PFDN1,HSPB6,CAVIN3,RALGPS2,HDAC7,MGLL,PALMD,ALDH1A1,ACSL1,PTGS1,ACSS3,UGP2,SPAG9,NFIA,ADH1B,PDXK,PLD3,ZFYVE1,CD36,ODF2,ARIH2,CDKN2C,RIPOR1,EAF1,BDH2,UBE4B,PPP1R1B,NID2,ARPC5L,UBAC1,ITIH5,CAMKK1,SLC4A1AP,AKR1C3,PRKCA,IDNK,ATP6AP2,H1FX,DNAJC21,LPIN2,SZT2,AFG3L2,ATP13A3,PLEKHA3,DHX57,MAP2K4,CAMK2G,ABCB7,PPP1R14B,ROMO1,AGR2,HAUS2,KSR1,TLK2,H3F3A,P3…
0.00120485600400094	PLIN1,ABHD5	AOC3,PLIN4,GNG2,RNMT,CAVIN1,ITIH5,EHD2,PFN2,MYEF2,HSPB6,RAB3IP,ASAH1,TCEA1,STARD5,SMAD1,SREK1,AHNAK,CPSF1,ASPH,FHL1,MGAT1,RRAS,RPE,CAPS,CD163,FOLR2,ME3,MSH3,UQCR10,KRT8,JAK1,KLC2,KYAT3,IP6K1,TLN2,PLIN1,CHMP3,TERF2,ARID4B,FEM1B,DHX9,CLSTN1,HEATR6,RETSAT,CAMK2D,POLR3B,ITGA1,AIFM2,SYNPO,NFRKB,ALDH2,RPS9,ABHD5,COBL,SUZ12,SMPD4,MDC1,ZHX1,EPB41L3,HAUS2,TTC27,MOB2,EIF2B3,MSTO1,PMPCA,IMP4,MRM3,FARSB,KIAA…
0.00120485600400094	LIPE,PLIN1	GGA3,CAPZB,EFHD2,ITGA2,EIF2S3,CCDC93,PAFAH1B1,PAG1,STK10,ATRX,HCLS1,FKBP15,AGFG1,TXLNA,ABCF1,ARPC2,ISCU,DOCK9,NDRG1,CLU,CTSF,ALDH2,TP53RK,PRDX2,EEA1,SNX2,PLIN4,EDEM3,OSBPL11,PLEKHO2,IFIH1,LGALSL,FABP4,LGALS9,KIF2A,DPH5,KLC3,CISD3,CCL5,POLR2J,AOC3,CNPY3,KIAA0513,PIK3R1,RARRES1,PPP1R11,DSG2,DBNL,SIRPA,LSP1,PARVA,DHRS4,LGALS7,INPP5D,TXNIP,TACC1,FBN1,TAB3,GRB2,OGDH,DTX3L,SCAMP2,CARTPT,LIPE,SYF2,AGRN,…
0.00120485600400094	PLIN1,LIPE	ADH1B,ITGA7,CAVIN1,HSPA12A,PLIN1,CD36,FABP4,GPD1,LIPE,AOC3,ACADVL,EHD2,MRPS14,EAF1,RFC1,ESD,FGGY,DES,ECM1,SMC4,MAOA,KRI1,MRPL30,EIF4ENIF1,MRPL12,MBNL2,GOLPH3,COA7,TRIM25,MIB2,DDAH2,MYO1C,CES1,EPB41L3,MRPS12,AOX1,MMRN2,CSE1L,ACO1,ENY2,ENOPH1,LAMTOR3,RBM3,OLFML1,NOSTRIN,THEM4,LENG9,LIMS1,RASIP1,AIFM2,PTER,SOD3,HSP90AA1,CAPZA2,PPP1R21,NID1,MGLL,NTPCR,TRAF3IP3,GRHPR,SOS1,MED16,HPS3,PLEKHO1,NCOA6,STX5…
1.14146304895733e-05	PLIN1,LIPE,ABHD5	HSPA12A,CAVIN1,EHD2,NOSTRIN,CD36,PLIN1,GPD1,LIPE,ITGA7,AOC3,PGM5,ADH1B,MGLL,HNRNPA2B1,IGFBP3,AIFM2,GNL1,OASL,PLIN4,PAPLN,PYCARD,FABP4,NDUFS6,ABHD5,GNPDA2,FYCO1,TIMM13,PTPN23,EIF4ENIF1,KIAA1671,EXOC3,ANXA9,MYO5C,ALDH1L1,SEC11C,ME1,CES2,CDK9,TIMM10B,SPINT2,TNXB,WWP2,VWF,GSTM4,MYO1C,NAA40,CASP2,SYNJ1,RIPK1,AKAP12,RABL3,HP1BP3,RPL8,MOCS2,KDM3A,SOS1,CRIP2,NSD3,NID2,HSP90AA1,THUMPD1,AP2B1,TLN2,CFAP20,P…
0.00825947013994772	SUMO3,ATRX,SUMO1,RBCK1,HDAC6,ZNF451,SP100	ZFP91,GATAD2B,RBM14,PNN,PRRC2C,SETD2,SDE2,SUMO3,ZNF787,INTS12,SRRT,RBMX,FNBP4,ISY1,SERBP1,RSRC2,CDKN2AIP,THRAP3,PCNP,COX17,VPS39,SMC1A,BOD1L1,RPS29,RPS26,ATRX,SFPQ,ACTA1,MFAP1,TMEM263,CENPB,SUMO1,CHMP1A,MAP7D1,GRHL2,SLC16A3,CHCHD3,RPS19,TMEM189-UBE2V1,RBCK1,TRIM2,CHMP2B,SAP30,SNUPN,PGGT1B,CHMP5,PRDX6,TRAFD1,ZYG11B,ZCCHC3,RBM6,WDR33,UQCR11,NDEL1,VPS26A,YBX1,HDAC6,HGS,IFI44L,MCM4,GBP1,C19orf53,ZNF3…
0.00825947013994772	SP100,SIN3A,PML,STAT3,SPTA1,TRIM22,TES	SP100,SNW1,TMOD1,EIF3C,NCBP3,DTX3L,MESD,CBLL1,FNBP4,TBC1D10B,PRPF6,ALDH1L1,CCDC9,TXLNA,CNDP1,ANXA1,ARIH1,SRRM2,ZC3HAV1,AGT,GATAD2A,MX2,PIP,RBM10,CTDSPL2,PPP1R2,QSOX1,SLC4A1,RBP7,MARK2,SFPQ,NDUFA13,SNTB1,HYI,DNAJB12,CSTF2,THRAP3,MICU1,SP3,C16orf62,PPP1CA,CCDC50,EDC3,ANAPC2,ELOA,SIN3A,CRISP3,SERPINA4,ITGA7,SUCLA2,SP140L,MB21D1,ABCF1,CIAO1,PML,CCDC12,PPP3CA,SHBG,SF3B5,PDZK1,CUL2,NID1,SEC61A1,DTYMK,N…
0.00825947013994772	SUMO3,ATRX,SUMO1,RBCK1,HDAC6,ZNF451,SP100	ZFP91,GATAD2B,RBM14,PNN,PRRC2C,SETD2,SDE2,SUMO3,ZNF787,INTS12,SRRT,RBMX,FNBP4,ISY1,SERBP1,RSRC2,CDKN2AIP,THRAP3,PCNP,COX17,VPS39,SMC1A,BOD1L1,RPS29,RPS26,ATRX,SFPQ,ACTA1,MFAP1,TMEM263,CENPB,SUMO1,CHMP1A,MAP7D1,GRHL2,SLC16A3,CHCHD3,RPS19,TMEM189-UBE2V1,RBCK1,TRIM2,CHMP2B,SAP30,SNUPN,PGGT1B,CHMP5,PRDX6,TRAFD1,ZYG11B,ZCCHC3,RBM6,WDR33,UQCR11,NDEL1,VPS26A,YBX1,HDAC6,HGS,IFI44L,MCM4,GBP1,C19orf53,ZNF3…
0.00825947013994772	SP100,SIN3A,PML,STAT3,SPTA1,TRIM22,TES	SP100,SNW1,TMOD1,EIF3C,NCBP3,DTX3L,MESD,CBLL1,FNBP4,TBC1D10B,PRPF6,ALDH1L1,CCDC9,TXLNA,CNDP1,ANXA1,ARIH1,SRRM2,ZC3HAV1,AGT,GATAD2A,MX2,PIP,RBM10,CTDSPL2,PPP1R2,QSOX1,SLC4A1,RBP7,MARK2,SFPQ,NDUFA13,SNTB1,HYI,DNAJB12,CSTF2,THRAP3,MICU1,SP3,C16orf62,PPP1CA,CCDC50,EDC3,ANAPC2,ELOA,SIN3A,CRISP3,SERPINA4,ITGA7,SUCLA2,SP140L,MB21D1,ABCF1,CIAO1,PML,CCDC12,PPP3CA,SHBG,SF3B5,PDZK1,CUL2,NID1,SEC61A1,DTYMK,N…
0.00825947013994772	SUMO3,ATRX,SUMO1,RBCK1,HDAC6,ZNF451,SP100	ZFP91,GATAD2B,RBM14,PNN,PRRC2C,SETD2,SDE2,SUMO3,ZNF787,INTS12,SRRT,RBMX,FNBP4,ISY1,SERBP1,RSRC2,CDKN2AIP,THRAP3,PCNP,COX17,VPS39,SMC1A,BOD1L1,RPS29,RPS26,ATRX,SFPQ,ACTA1,MFAP1,TMEM263,CENPB,SUMO1,CHMP1A,MAP7D1,GRHL2,SLC16A3,CHCHD3,RPS19,TMEM189-UBE2V1,RBCK1,TRIM2,CHMP2B,SAP30,SNUPN,PGGT1B,CHMP5,PRDX6,TRAFD1,ZYG11B,ZCCHC3,RBM6,WDR33,UQCR11,NDEL1,VPS26A,YBX1,HDAC6,HGS,IFI44L,MCM4,GBP1,C19orf53,ZNF3…
0.00825947013994772	SP100,SIN3A,PML,STAT3,SPTA1,TRIM22,TES	SP100,SNW1,TMOD1,EIF3C,NCBP3,DTX3L,MESD,CBLL1,FNBP4,TBC1D10B,PRPF6,ALDH1L1,CCDC9,TXLNA,CNDP1,ANXA1,ARIH1,SRRM2,ZC3HAV1,AGT,GATAD2A,MX2,PIP,RBM10,CTDSPL2,PPP1R2,QSOX1,SLC4A1,RBP7,MARK2,SFPQ,NDUFA13,SNTB1,HYI,DNAJB12,CSTF2,THRAP3,MICU1,SP3,C16orf62,PPP1CA,CCDC50,EDC3,ANAPC2,ELOA,SIN3A,CRISP3,SERPINA4,ITGA7,SUCLA2,SP140L,MB21D1,ABCF1,CIAO1,PML,CCDC12,PPP3CA,SHBG,SF3B5,PDZK1,CUL2,NID1,SEC61A1,DTYMK,N…
0.000430537067568944	PNN,THRAP3,CCDC9,RBBP6,PPIE,BCLAF1,SAP18	NEMF,MARCKS,HNRNPDL,PNN,SLU7,PRRC2C,ASNA1,MFAP1,HGS,THRAP3,COMMD10,NFX1,RPS11,CCDC9,SP3,RABGAP1L,YBX1,RBBP6,BLOC1S5,ATP5D,PCNP,UQCRQ,UBL5,HDDC3,HSPA8,RPS29,NAP1L1,RPS18,SRSF3,PPIE,LRWD1,INTS12,ABHD14B,POLR2D,RBM26,ELOA,SMC1A,ATG101,SERBP1,PGAM1,MRPS18A,INO80E,BCLAF1,UBP1,REPIN1,UBE2N,SAP18,DSCR3,SLTM,TAOK3,VPS11,CCDC86,RBM6,ZFPL1,PHF3,SAFB,LYVE1,SOD3,ARAP1,ARF1,TTR,DSP,FKBP14,GPD1,ZC3H13,RAN,PCBP…
0.00125583556098746	SMARCA4,HIRA,PPP1CA,SRRT,UBE2L3,CREB1,POLR2A,MED21,SETX,PIH1D1	SUMO2,GATAD2B,SMARCA4,ZFP91,SARNP,BCLAF1,ELOA,PPP1R2,CMC4,TMEM189-UBE2V1,CCS,SNW1,HIRA,CLIC1,PPP1CA,SRRT,RPS11,UBE2L3,HS1BP3,PNN,ZRANB2,EIF3C,CREB1,ATXN2L,TXLNA,RPL35A,RBM25,RBCK1,RTF1,POLR2A,MED21,RTFDC1,PLXNB1,MARK3,ACP1,CMC1,SETX,NOA1,BCAS2,DOHH,CLTB,NENF,RPS29,ELANE,PIH1D1,TFCP2,ACTBL2,RPL32,NUDT16,NIPSNAP3A,PPIA,PPP2R5B,NDUFA7,GRN,SON,RPS19,SLTM,DAP,GATAD2A,JAK1,NRBF2,TJP1,TBCA,MARCKSL1,NIPB…
0.00447126886464079	SRRT,RPS20,SMC1A,MED26,WAC,DNMT3A,CSTF2,UNK,ZC3H13	SRRT,PNN,TBCA,GATAD2B,ZC3H4,ARID1A,ZFP91,ATXN2L,PCNP,HDDC3,ISY1,SMAD5,BLOC1S5,RBM14,NDUFA11,SRFBP1,PPIE,NAPG,IK,UBL5,RPS20,SMC1A,EIF5A,MAEA,CLTB,LRPAP1,YY1,GCHFR,ZMYM2,TRIM2,MED26,ZNF668,NDUFV3,SP3,SNW1,SCCPDH,COPRS,NHP2,CMC4,RAB5C,IGF1R,BCLAF1,LTBP4,SUMO2,BOD1L1,SAFB,FARP2,PXDN,MED8,NDE1,C4B,RFWD2,SMCR8,PHLDB2,TFB1M,BCAS2,UBQLN2,NOL7,PYURF,WAC,TPRKB,ARL6IP4,ATP9A,B3GLCT,DAXX,GGPS1,PCYOX1,TNS1,TH…
0.00447126886464079	SRRT,RPS20,SMC1A,MED26,WAC,DNMT3A,CSTF2,UNK,ZC3H13	SRRT,PNN,TBCA,GATAD2B,ZC3H4,ARID1A,ZFP91,ATXN2L,PCNP,HDDC3,ISY1,SMAD5,BLOC1S5,RBM14,NDUFA11,SRFBP1,PPIE,NAPG,IK,UBL5,RPS20,SMC1A,EIF5A,MAEA,CLTB,LRPAP1,YY1,GCHFR,ZMYM2,TRIM2,MED26,ZNF668,NDUFV3,SP3,SNW1,SCCPDH,COPRS,NHP2,CMC4,RAB5C,IGF1R,BCLAF1,LTBP4,SUMO2,BOD1L1,SAFB,FARP2,PXDN,MED8,NDE1,C4B,RFWD2,SMCR8,PHLDB2,TFB1M,BCAS2,UBQLN2,NOL7,PYURF,WAC,TPRKB,ARL6IP4,ATP9A,B3GLCT,DAXX,GGPS1,PCYOX1,TNS1,TH…
0.00447126886464079	SMC1A,SMARCB1,ZC3H13,SRRT,VCP,MED20,CALCOCO2,INTS1,CTR9	TBCA,SUMO3,PNN,SARNP,ZFP91,CLTB,GATAD2B,MAEA,RSRC2,NDUFA7,PPIE,FCER1G,SAR1A,RABGAP1L,NDUFS6,MARCKS,TPRKB,HDDC3,MARK2,SP1,RPS11,SMC1A,RPS18,SARS,MRPS18A,RBM6,PRRC2C,COX17,RPL35A,SMARCB1,CDKN2AIP,MYL12A,RPS26,CCS,ZC3H13,ARL3,NFYA,IK,SRRT,PSMD9,WDR77,YLPM1,PEX5,SMG9,YME1L1,PCNP,SUFU,RTCA,EIF3C,COPE,UBL5,ZNF24,RPL32,VCP,THRAP3,CNOT11,TRAFD1,ZC3H4,HDGFL2,COX6C,MED20,GUK1,PSMD14,SNRPD3,GPX3,SLU7,CALCOC…
0.00447126886464079	SMC1A,SMARCB1,ZC3H13,SRRT,VCP,MED20,CALCOCO2,INTS1,CTR9	TBCA,SUMO3,PNN,SARNP,ZFP91,CLTB,GATAD2B,MAEA,RSRC2,NDUFA7,PPIE,FCER1G,SAR1A,RABGAP1L,NDUFS6,MARCKS,TPRKB,HDDC3,MARK2,SP1,RPS11,SMC1A,RPS18,SARS,MRPS18A,RBM6,PRRC2C,COX17,RPL35A,SMARCB1,CDKN2AIP,MYL12A,RPS26,CCS,ZC3H13,ARL3,NFYA,IK,SRRT,PSMD9,WDR77,YLPM1,PEX5,SMG9,YME1L1,PCNP,SUFU,RTCA,EIF3C,COPE,UBL5,ZNF24,RPL32,VCP,THRAP3,CNOT11,TRAFD1,ZC3H4,HDGFL2,COX6C,MED20,GUK1,PSMD14,SNRPD3,GPX3,SLU7,CALCOC…
1.46403480623051e-06	SERBP1,PPM1G,TARBP2,POP1,SNRNP70,WDR46,PES1,CUL3,GPATCH4	PNN,MARK2,GATAD2B,PRRC2C,PCNP,SERBP1,ZFP91,RPS26,MARCKS,ZNF787,UBL5,ARID1A,YBX1,PPM1G,ATXN2L,INTS12,PTBP1,PCBP1,THRAP3,TARBP2,SRSF3,TCOF1,UBQLN1,SRRT,ATP5B,CDKN2AIP,IDNK,SRRM1,RPS3A,C1QC,TMEM189-UBE2V1,POP1,RRP1B,CHCHD3,ZNF668,SNRNP70,WDR46,ZC3H14,TAOK1,NFXL1,HGS,PES1,PABPN1,MTX2,DDX52,LCLAT1,DIEXF,RPS29,KLHL42,GPT2,MARCKSL1,ELOA,RPL12,KAT8,SMIM12,FCHO2,PPAN,KNOP1,RPA2,CUL3,ANXA2,HIBCH,HERC5,PRKR…
0.00511806910631424	SERBP1,GPATCH4,WDR46,PPM1G,PIH1D1	PNN,MARK2,MARCKS,PTBP1,PRRC2C,ATXN2L,SERBP1,ZFP91,ZNF787,ELOA,UBL5,SRRT,RRP1B,FTSJ3,GATAD2B,TCOF1,RPS26,RPL32,RBM26,ZC3H18,ACTA1,ARID1A,PPP2R5D,ZNF638,ISY1,GPATCH4,SGTA,RPS3A,UBE2V2,WDR46,VPS25,EXOC8,PPM1G,RRP1,DDA1,C7orf43,TRMT61B,PCCB,PRKAB1,RSL1D1,DAPP1,PUM3,UBFD1,FCER1G,NCL,PROM1,MRPS5,ATXN3,FOXP4,KDM5C,ATG2B,INPP1,MLEC,HDAC7,VAMP8,SMPD4,RAB9A,RNF113A,PPP1R9A,NPNT,RPS10,TOP1,FAM162A,HDAC2,KDM…
0.00362917616553161	PPAN,RPS6,RPL3,PPM1G,RPS3A	GATAD2B,PNN,MARK2,ISY1,ZFP91,SUMO3,RPS26,TBCA,TMEM263,SRSF3,UTP11,PPAN,CLTB,YLPM1,PRRC2C,SRRT,COX17,ATXN2L,RPL29,PCNP,RBM14,RBM6,RPL32,DDA1,NDUFS6,NDUFA7,ARID1A,SFPQ,PHF5A,RPS29,CNBP,XRCC1,GDI1,RPS6,RPL26,RPS5,RPL24,YBX1,RPL10,BMS1,CHMP1A,NOC3L,SURF6,SEPHS1,NOM1,RPL35A,RPL3,SARS,PLCB1,LYAR,RPL13,FTSJ3,DGKQ,CLEC3A,FAM172A,RPS8,CHTOP,ANO6,APCS,STAM2,NISCH,ENPP1,DYM,PPM1G,AGTRAP,CD248,SEPT4,RPL27,TM…
0.00119481994730035	PNN,SARNP,ZC3H18,PPIG	GATAD2B,RBM14,RPS11,SUMO3,PNN,RPS26,SARNP,PHF5A,RBMX,NDUFA7,CLTB,SUMO1,TBCA,ZFP91,HDDC3,SRSF7,RPS29,RPS19,SLTM,CHMP1A,RPS20,SRRT,ZC3H18,RBM5,MED22,COA6,CYB5A,KANSL2,SRSF2,PDPR,RPL26,NDUFA5,HGS,EIF2S3,RPL35A,PPHLN1,EXOSC6,ELAC2,CNOT7,CHCHD3,SNRNP70,RABGAP1L,REPIN1,PPIG,ILKAP,PPOX,LAMB3,ARGLU1,RPS15A,SMC1A,EZH2,MAPK8,FAM136A,PHAX,ZNF460,SAP130,CD2AP,WASF2,BOD1L1,TMEM189-UBE2V1,RPS5,QTRT2,MMAA,ZMAT2…
0.00106160122782453	PPL,EVPL,PSMB4,PDE4DIP	EEF1A1,RPS26,PGAM1,GPATCH8,PPP1R11,ASNA1,GATAD2B,TBCA,HNRNPDL,SRSF3,MARK2,HDDC3,ZC2HC1A,RCOR1,UBL5,CLTB,UBAP1,SMC1A,SRFBP1,LRPAP1,HSD17B10,PDCD6IP,SDE2,MARK3,PPL,BOD1L1,SUMO3,CCT7,NDUFA11,PPIE,EVPL,ANAPC4,SAR1A,RPS18,UBE2L3,ROCK1,CALD1,MED21,NUP43,CUTA,PSMB4,SEPHS1,NDUFA7,UBA1,SETX,LMNA,ATPAF2,HOOK2,ANXA4,CHMP3,MX1,BIRC2,HPS3,MYOF,ADAM10,ALDH5A1,RBKS,PDE4DIP,PRCP,XAF1,APOBEC3G,LIN9,PRKAA1,ARHGEF5…
0.00689728285801005	PPP1R12C,PPP1R12A	HDDC3,CLTB,GATAD2B,SUMO3,SDE2,LRPAP1,NDUFA7,SRFBP1,FAM192A,SETD2,PNN,RPS11,SRSF3,ZFP91,PPP1R11,PPP1R12C,USF2,TBCA,ATXN2L,NOL8,CHMP1B,ACTBL2,SAR1A,KLF16,TFCP2,EEF1A1,BUD13,INO80E,DNAJC8,FBXL18,MRPS18A,GPATCH8,SLC4A7,EIF4E3,ZNF609,CAAP1,MAPK7,CRIPT,CHMP4B,LALBA,PELP1,SRRM1,CHKA,DBNL,PTX3,MELTF,NFS1,RPS27L,CD9,PPIL3,ZNF516,GIT1,NLRX1,ANKIB1,ZC3H12A,PPP1R12A,SLC12A2,CLEC16A,MLST8,EIF4G3,RAB2A,CHURC1-…
0.00295595877741064	PPP1R3D,PPP1CA	PPP1R3D,TTC38,DNAJA1,POF1B,MYO1D,ANO10,ALDH5A1,EZH2,RMDN3,SMAP1,DDR1,WDR48,ARHGAP24,HNRNPA0,KLHL36,NCOA7,DHPS,PVALB,SSBP1,TPRN,TXNL1,PRG2,PGP,STOML2,ATAD3A,MAPKAPK3,PIP5K1A,FBN1,ANAPC7,ADRM1,RAB2A,PRNP,KAT5,MACROD1,C1QB,NGRN,AP1G2,CLC,GART,GSPT1,XPO6,GSK3B,VPS13C,NPM1,VTI1A,PSMB5,TAF2,PPP4R3B,COPS7A,POMP,MRGBP,EML3,CA3,LSR,GNAQ,C9orf64,TRIM32,ELOB,LRRC57,TIMM23,DCAKD,LYPLA2,SBSPON,NUDT15,STIM1,AT…
0.00833841774453024	NSUN5,HSPA8,AP2A2,USP10	PCF11,UTP15,NSUN5,EPB41,SHKBP1,APOH,ZNF598,PPIL1,RPL4,PLEKHO1,THOC7,HSPA8,SETD3,PALD1,MMP19,ACAN,OTULIN,SAE1,CYP51A1,FOXA1,SP1,MAPRE3,ERP29,USO1,DHX15,PSME1,HPGD,SGPL1,RTL8C,TPD52,DYNC2H1,AP2A2,RAB3GAP1,PGAM2,AP2M1,AOC3,STX7,QSOX1,GMEB1,XAB2,ATP1A1,TTC33,NCAPG,ZNF217,TUFM,AKT1,PIK3C3,BDH2,DCTN5,SMYD2,TNN,RHPN2,FAM213A,DDX39A,MPI,PHGDH,EEF1AKMT2,HTATIP2,DSCR3,KHDRBS3,WIZ,RIOK2,IGFALS,XRN1,AK2,COMM…
0.000471488513733914	MDC1,KIF23,RBM10,KIF4A	EHD3,RPP38,SLIT3,ITSN1,THUMPD3,POLR2B,TMED2,TOMM20,MDC1,TMEM57,PIP,MCM2,KIFAP3,THOC3,CHGB,KIF23,SMC2,HMCES,CIT,EIF4G1,TACC3,SMNDC1,PLIN2,RPL17,MCM5,ATAD2,DYNLT3,NCAPH,PSMA1,SPG21,SNRPN,CCDC174,MRPL58,FAM198B,ABCF3,TOP2A,LZTFL1,SNRPA1,NCDN,BAX,IRS1,ECT2,TINAGL1,TPP1,FGF1,TRMT1,MCM7,SYF2,FAM136A,MSH2,STX7,MAN1A1,CHERP,ZNF592,WDR46,NDUFA5,CHAF1B,FAM50A,NAA15,INO80C,DEPTOR,IMP4,MSH6,DNMT1,TONSL,ANGEL…
0.00589632292456315	KIF23,PRC1,CDK1	MCM2,NCAPH,CHAF1B,NCAPD2,DAG1,CEBPB,NCAPG,API5,CASP2,KIF23,WDR74,TACC3,SMC2,MCM6,GINS4,KIF2C,KPNA2,PRC1,MPHOSPH10,DUSP3,CST3,POLE4,NUF2,ZCCHC17,ATE1,WDHD1,FMOD,VCL,PAPSS1,SLIT3,EZH2,TARDBP,RSL1D1,DTYMK,RBM8A,WISP2,PSMG2,NEXN,TMOD2,DEPTOR,CP,DYM,MBP,RRS1,ZGPAT,KARS,PSMD8,HMCES,CDK1,HSPA4L,PPIH,MAD2L1,DSCC1,LSM8,ANLN,DDX52,MKI67,GPD1L,NOL11,DYNLT3,BRK1,SNRPA1,UBE2C,ELAVL1,H2AFY,ARPP19,PDLIM2,ABCF1,…
0.00203744342952683	PNN,UBQLN1,YBX1,ZC3H18,RBM39,SNRNP70,YLPM1,SFPQ	SUMO3,ZFP91,TCOF1,MARK3,PNN,RBM6,CLTB,MAEA,SRRT,ATP5B,SMC1A,NDUFS6,RBM14,NUP43,ANAPC4,MARCKS,UBQLN1,MFAP1,SLTM,PPIL1,RPS18,UBL5,BOD1L1,RPS29,BLOC1S5,NDUFA7,NF2,PCNP,ARID1A,YBX3,ZC3H13,LRPAP1,TXN2,SMAD5,USP36,VEZF1,ZNF787,RBBP6,CUTA,ASNA1,ACTA1,MRPS15,MARK2,RPS11,NDUFS3,FTSJ1,SETX,C19orf47,PTBP1,GDI1,YBX1,ZRANB2,ADRM1,LSM7,BTD,BLOC1S1,SNX3,BBS2,SPAG1,MLLT6,ZC3H18,NOLC1,RAP1A,ACTBL2,PRRC2C,AFF4,COM…
0.000457521687083703	PNN,ACIN1,RBM25,NONO,SART1,FNBP4,NR2C2,SF3B2,CDK12	ZNF24,SH3BGRL2,PNN,HELZ2,MYL9,GATAD2A,ACIN1,NDUFA1,ELL,BUD31,EHD3,ZNF598,POLR2A,CCDC86,STIP1,MEPCE,RBM10,RBM25,NAA10,RNF40,ATXN2L,YARS,DCAF11,MRPS2,DIDO1,AKAP12,DPYSL2,ZC3HAV1,IGF2,RBBP6,SAP130,SYMPK,NONO,RNASE1,SETDB1,LSM6,BIN3,ZFR,PRKAB2,SART1,EDC3,SMG8,FNBP4,NR2C2,MYL12A,TXLNA,SF3B2,EIF3G,PSMD3,EXOSC6,ME1,TBC1D13,USF1,MRPL20,KIAA1522,NBN,CDC73,ZNF638,G3BP1,MED8,OTUD4,WISP2,FBXW8,CDK12,SMG1,LAC…
0.00203744342952683	SART1,RBM25,NONO,SNW1,SON,ZC3H18,PRPF40A,ZFHX3	SART1,RBM25,NONO,SMNDC1,EPCAM,CSAD,KIF11,DCLK1,POLR2A,TRMT1,MEPCE,HYI,INTS5,EIF3C,ESRP2,CNOT11,TRIP12,PODN,DDAH2,DCAF7,APOC4-APOC2,WDR33,PFDN2,ZNF638,CPSF1,SNW1,NOB1,SON,RPAP3,ALDH1A1,KHDRBS1,RPS27A,SMN1,NELFB,RBM17,DMAP1,TPR,ORM1,ATXN2L,MAD2L1,GPX3,PPP1CA,PRRC2A,GEMIN5,MED22,ZC3H18,TBC1D13,KIFC1,NOLC1,LYAR,MRPS6,SH3BGRL2,SMC3,SP1,AGO1,MXRA7,EIF4G1,DPYSL3,PGLYRP2,SAFB,GTF2E1,AGT,GUCY1A3,PRPF38B,F…
0.000704760959151702	SERBP1,RNPS1,ZRANB2,PNN,ZC3H18	WDR33,EIF4B,ELOA,SZRD1,MARK2,SP3,UBXN4,ZNF787,RBBP6,NEMF,NOLC1,NDUFA1,TARBP2,SAP18,CHMP2B,TCOF1,SRRT,YLPM1,ZC3HAV1,CCDC86,LUZP1,THOC7,DSCR3,MAX,ANXA5,CPSF2,SRSF3,SERBP1,CALM1,BRD1,ARL14EP,SLU7,SNRPE,MAZ,ZNF638,PCNP,MRPS18A,RNPS1,EIF1,NUP43,HGS,JUND,GSKIP,RPL29,BUD13,ATP6V1B2,PIAS1,MARCKS,CLTB,ZFP91,REPIN1,SEPHS1,ZRANB2,SP1,LSM5,NACA,MRPS12,MRPS15,PRRC2C,KIAA1143,SNUPN,SAFB,BRWD1,EIF1B,RTN4IP1,CAS…
0.000704760959151702	PNN,PRPF6,RNPS1,SERBP1,ZC3H18	PNN,EIF3C,HNRNPDL,CLTB,RPS18,BLOC1S5,CWC22,MRPS15,TPR,SP3,UBAP1,ZNF668,SMAD5,MARCKS,NDUFA7,SMC1A,MARK2,TBCA,RPS26,EIF3A,MAX,MRPS18A,NDUFA13,RGS3,ATP5A1,NEMF,GPATCH8,ADO,UBE2I,PFDN4,VPS39,INTS14,PRPF6,HSPA8,CASP8,CEP44,PNISR,PPCDC,SLTM,ZC3H14,CCT6A,SETX,RPS21,GATAD2A,EVI5,PDS5A,OTUD4,NCBP3,TSC22D2,LRPAP1,PPIE,DUSP3,LSM12,RUVBL1,RPL26,PSMD9,SRSF3,PYM1,GATAD2B,NFATC2IP,RPS20,SRRT,DAZAP1,SRFBP1,RNPS1…
0.000704760959151702	PNN,ZRANB2,RPS11,SERBP1,PRPF6	PRRC2C,PNN,ATXN2L,ELOA,YBX1,SRRT,EIF3C,ZNF787,UBL5,ZFP91,ZC3H13,MARK2,WDR33,EIF4B,ZRANB2,FAM192A,THRAP3,TCOF1,UBTF,SCAF1,ZNF460,PCNP,RPS11,MARCKS,LBP,ABLIM1,SERBP1,HIST2H2AB,FAM117B,NDUFA6,TDP1,PLG,CARTPT,TMX1,PHAX,F13B,SLK,AP5M1,DIDO1,USP4,BCLAF1,SMC1A,ARID1A,LANCL2,KMT2C,SENP8,SRCAP,IGLL1,RREB1,XRCC5,PSMA5,ARF1,SERPINF2,FUBP3,MED10,PRPF6,ZC3H11A,PPP6R2,KNOP1,CARD8,SPTLC2,PDE4DIP,ARSB,UBR2,ZNF45…
0.000704760959151702	PNN,SERBP1,PRPF6,PRPF4B,ESR1	ATXN2L,PNN,SRRT,PHF5A,ELOA,MRPS18A,GATAD2B,ZFP91,RPS29,SERBP1,SMC1A,YLPM1,MARK2,XRCC1,ZNF787,SMAD5,SUMO3,PRPF6,TARBP2,ZC3H13,SRSF3,NOLC1,RBM14,CENPB,SRSF6,ZC3H4,TCOF1,RPS26,SF3A3,HAUS3,RALY,ATRX,FTSJ1,CDKN2AIP,SP3,SARNP,CHMP4A,PCBP1,IK,TBCA,LBH,EIF1B,RPL35A,RSRC2,SLAIN2,PRPF40A,A2M,UBAC1,POLR2E,LYVE1,TANGO2,SOD2,CDC40,TOMM40,GALT,IGLL1,LPGAT1,BCLAF1,WIPI1,SELENOW,LGALSL,D2HGDH,RPS12,F13B,PRPF4B,A…
0.000704760959151702	PNN,RPS11,ZC3H18,SERBP1,NCBP2	SUMO2,RBM14,SUMO3,LSM6,PHF5A,PTBP1,RBMX,CARTPT,RPS21,EIF4EBP1,IK,PNN,RSRC2,PPIL1,LRPAP1,RPS18,TBCA,UBQLN2,FCER1G,RPS11,USF2,CUL4B,SYNPO2,LSM7,KRAS,SP1,TRIM25,YTHDF3,NCBP3,CPN2,APOC1,VPS29,MRPS2,MRPS12,MED18,RBBP6,POLR2H,RAB2A,ELL,RPL36,TPR,SHKBP1,SOD3,TRIOBP,BOD1L1,ZC3H18,VIRMA,BRAP,RAB1A,FBXO6,AAMDC,ST13,CD59,ZYG11B,MAP3K7,DHCR24,CNOT6L,SRSF5,NFKBIB,TXNDC5,DUSP3,PTPN11,RPL27A,CHGB,CNN1,CUX1,CHTO…
0.00558186551056364	PNN,PRPF6,SERBP1,RPL5	SRRT,PNN,ATXN2L,GATAD2A,SNRNP70,EIF3C,SMARCA4,RNF40,UBN1,PRRC2C,YBX1,CDC73,SAP130,EIF4B,MRPS18A,ZC3H11A,TTR,ZHX2,ZFP91,ACIN1,ZFAND6,YLPM1,RPS26,PRPF6,ZNF787,RTF1,ZC3H4,ARID1A,PTGDS,SERBP1,ARHGAP30,TTC37,GPX3,ITGA7,DLG1,ASPN,VPS25,SERPINF1,EXOC1,ATXN2,BTD,VPS39,UBAC1,AOX1,PTMA,CYGB,COX6C,NHLRC3,F13A1,CUTA,DGKA,DNM1,UBR4,TRIM4,ANAPC7,PI16,GPNMB,CIAPIN1,HSD17B11,MRPL38,AKAP9,GPD1,CCT8,DCLK1,PEAK1,MY…
0.00558186551056364	PRPF4,SART1,PRPF6,PRPF4B	SPG7,TAF8,PRPF4,ALG2,PLCB1,PPP1CA,ZDHHC5,SART1,ELOC,MRPS26,SF3B1,PRPF6,UCK2,HAUS8,DNAJC7,MRPL37,NAA10,HOOK2,SOD3,MTPN,EIF3B,STAT3,SHOC2,MARCKSL1,TMOD1,GPX3,PSMA3,EIF5B,FBLN5,U2SURP,PALM,RAB22A,LRRC14,FARS2,TOP3A,DPYSL2,CSTF2,SLC12A2,PLEKHS1,XAB2,MOB1A,FRMD6,MAEA,PM20D2,PPP1R14A,NMT1,ZNF346,NCBP3,SMARCAL1,GPAA1,MRM3,DNM1L,PRPF4B,STIP1,GFER,CHAF1B,LYVE1,THOC1,SNRPD3,EHD3,TBC1D10B,PPP1R11,TRMT1,TXND…
0.00301538837144076	NOP16,PES1,RRP12,DDX31,FTSJ3	TMEM214,VPS28,LSG1,MTX1,HLA-C,NOP16,TMX1,NUP93,HDHD2,SDAD1,PEX14,CUX1,RAB4B,NCLN,TIMM29,GATAD2A,STC2,HECTD1,TOP1,SETDB1,FCER1G,EEF1D,SS18,VAMP2,ZC3H7B,CXorf38,LARP4B,TSR2,EIF5,LARP7,ZBTB7B,GCN1,FAM32A,ZFPL1,PSMD9,RPP38,HBG1,OSGEP,DHX37,PES1,PI4K2A,TAF6,THEM6,EIF4E3,TPD52,RECQL5,NUF2,ANKLE2,GCHFR,PLD4,PKNOX1,GLUD1,NDUFB5,DHX29,PIGT,SYNJ2,CLEC3A,NFKBIA,PSMD3,AHCYL1,RRP12,HM13,SNRPD2,JUND,CENPV,RPS1…
0.00689728285801005	EWSR1,PRR12	SFPQ,PNN,PTMA,F13B,APOC3,MCAM,AKR1C2,ORM2,SNRNP70,GGCT,EMC7,SCAF11,SERBP1,SERPINA7,MARK2,C3,AMBP,PTGDS,ATP6V1G1,TPM1,ITGA5,LIX1L,EPB41L3,QARS,PLAC9,PPP2R5C,STAB1,EMILIN1,STAU1,CNOT9,HNRNPK,ZMYND8,MPHOSPH10,LMAN2L,GIMAP8,FRK,KCNAB2,IGFBP4,OCRL,RBM12,NAA20,RHOG,AQR,TCF20,PRMT5,NUDT8,VCL,LAMC1,RIOX1,PDZRN3,PPP3CC,HSPH1,CSTF1,XRN2,EWSR1,C1QB,ARRDC1,AVL9,PDCD10,APOA1,SOWAHC,SPEN,HSPBAP1,PPP4R3A,TFEB,C…
0.0080329549108168	PRRC2C,EZH2,CHD4	SARNP,MARK2,PTBP1,PNN,GATAD2B,POLR2D,RPL5,NDUFA7,PHF5A,ZNF787,DNPEP,CLTB,HGS,CUTA,PPIA,CREB1,SUMO3,ELOA,PRRC2C,PCNP,PPIE,ARID1A,RRP1B,RPS18,DDX3X,BCKDHB,LARP4B,FUCA1,GAMT,PHYHD1,LBR,ARMT1,AKR7A2,SNF8,SYBU,PHYKPL,RPL23A,NOP2,MMAA,RPS23,WDHD1,RPS3A,PRKAR2A,EML2,ATE1,ENTPD5,RPS6,BBS2,GSPT1,RABGAP1L,BPIFB1,KIF2C,CTSZ,CNP,NUP153,RPL32,CUL4B,RRP1,BUD13,DNMT1,RPL35,EZH2,ABHD14B,TBC1D9B,METAP1,TMEM189-UB…
0.00128657906138649	THRAP3,PSIP1,ZC3H18,SP1,TRA2B	PNN,HGS,TCOF1,ZNF787,THRAP3,ZRANB2,SRRT,PRRC2C,SP3,NDUFA11,SH3BGRL2,ACIN1,YBX1,ZC3H4,CCDC86,MED22,HPCAL1,PSIP1,MED9,LRPAP1,NUDT16,ZC3H18,RPS26,RREB1,DNAJC8,SRSF3,RBM33,BRD4,CCDC9,SP1,PTBP1,GPATCH8,PDZD11,RBMXL1,PPIL1,MVB12A,ZNF460,DNM2,C1orf50,LUZP1,TPRKB,ZNF24,SLTM,ELOA,HAUS3,C19orf47,PPCDC,TAOK2,DPCD,PNISR,UBL7,C5orf24,TFG,BCAT1,SMS,ZC3H13,PSMF1,RPLP2,CDC42EP4,ABRAXAS2,NFX1,SACM1L,COPZ1,HNRNPR,…
0.00887063198476749	THRAP3,SERBP1,SP1,ZC3H18	ZNF787,PPP1R12A,C1orf174,PCNP,ZC3H13,RBBP6,RPL35A,EIF4B,HGS,YY1,SLTM,CHMP4B,RBM6,NFXL1,PPIA,HDGFL2,SP3,ACTB,BASP1,CCDC9,SLU7,ZFP91,RPS19,ZNF330,SNUPN,PRRC2C,THRAP3,MARCKS,RCSD1,PPP2R5B,TCOF1,PHF5A,MFAP1,EIF1B,COMMD8,RHOA,RXRB,TRIR,UBL5,ZC3H14,QTRT2,UQCRQ,SNX15,CNBP,PYM1,BLOC1S5,SERBP1,CDKN2AIP,PNN,ZNF460,YWHAH,RPL32,WRAP53,SP1,GDI1,TOR1AIP1,NDUFA11,SCAF8,APOO,FNBP4,COMMD3,TBCC,FAS,ZC3H18,HMGN2,AR…
0.00599116833074609	RPL32,RPL29,PSTPIP1,RPL18A	TXLNA,GATAD2B,SARNP,RPL32,GIMAP4,PPP1R18,CCDC93,RPS11,RPS26,ROCK1,RPS18,SRRT,ATRX,INTS12,ATXN2L,LSP1,RRP8,MARCKS,MRPS18A,CUTA,ATP5B,PNN,RPL29,DNAJC8,ARHGAP15,MSN,RCSD1,PCNP,RPS29,NAP1L1,SRFBP1,CORO1A,WNK1,FAM192A,PRKAB1,PPP1R11,LASP1,PPIE,RPS15A,MARK2,THRAP3,BCLAF1,NAA10,PRRC2C,CRLF3,ARHGAP30,FNBP1,AMPD3,DEF6,TRAPPC8,RIOK1,PSTPIP1,SCCPDH,TOMM5,MTX3,CCDC22,GOLGA3,SUMO2,FGL2,EHBP1L1,VWA8,UNG,RALGAP…
0.0027084224554571	SIPA1L1,DENND1A,DNM2,LPIN3	MTDH,ATP5E,S100A10,NOL8,STK25,RFX5,PPP4C,RBM26,NOTCH3,NFATC2IP,MBIP,MAX,EIF4EBP1,GUCY1B3,KANSL2,CCZ1,LAGE3,SDE2,ZNF24,LAMTOR3,ADK,ACAA1,RPL29,FTSJ1,CCT6A,SAFB2,C19orf70,PRPF6,ZMAT2,GLMP,WNK1,ARL3,CREBBP,MAZ,BOLA1,TPT1,MRPS15,PRCC,ZNF652,ATXN2,LANCL2,NMRAL1,CDKN2AIP,EIF5A,CHMP1A,CAMKK2,PPIC,WDR45,CDA,SIPA1L1,C5orf24,ZNF787,SCAF1,MEMO1,TCOF1,USP36,NDUFA11,DENND1A,AFG1L,ACAN,HDDC3,RTCA,ARID1A,EMSY,R…
0.0027084224554571	CTNNB1,CGN,DENND1A,FBXW11	DOHH,HABP2,NDUFA5,RNPS1,NECTIN1,SUMO1,ACE,CTNNB1,NDUFA11,RREB1,GOLIM4,LTF,LAMTOR3,UBL5,ASNA1,XRCC6,TPRKB,PMF1,MAVS,CARTPT,CGN,TG,SNRPE,RPA3,HOOK2,CAAP1,GATC,BLOC1S5,IFT20,YIPF5,SRSF7,PPIA,ELL,CPSF2,DCP1A,USP36,EMG1,WDR45B,HADHA,AMPD2,DLAT,STEAP4,UBAP1,RPL13A,RTFDC1,SSSCA1,RBM3,ZKSCAN1,RPS11,GCA,NDUFAF2,GCC1,MRPL42,DENND1A,EPM2AIP1,SAP130,ZNF787,XRCC5,CCDC124,GLYATL2,UQCR11,NCOA5,PIH1D1,FAM162A,NI…
0.00632394556442281	RPL18A,INSR,CTNND1,CDK1,DARS	CLSTN2,MACF1,GMDS,DOCK1,EFHD1,NAXE,ADPRH,FNBP4,TNIP1,KIAA1522,PAM,MRPL33,ARID1A,RPL22,GOSR1,PANK2,TTC39C,SPG11,ZFP36L2,YLPM1,LSM6,RPL18A,PKP4,FCGRT,ERI1,COL3A1,SCAMP2,MRPS18C,POLR1A,POGZ,IDE,MFAP1,VPS51,DHX33,PRODH,DPP7,PNKD,F5,ERLIN1,ZSCAN18,INSR,HDDC2,C19orf25,FN3K,SPINT1,RAB35,OASL,TRIM22,TRMT5,CYB5R2,NUMB,VHL,HABP4,RANGRF,CYR61,HP1BP3,TMPO,TDP2,VCAM1,RIF1,GATAD1,HOOK2,HS1BP3,PRPF39,RBM26,SASH…
0.000736639436110852	GIT2,PXN,ASAP1,CSK,TLN1,GSN	PLBD2,SH3GL1,AIP,GLIPR2,RAB33B,DIAPH1,MDH2,EZR,COMMD2,EDC3,GIT2,PI4K2B,SFXN4,PRKAR1A,NRP2,KLC1,SLC25A36,PXN,CPEB2,MMP14,ADAP1,PKN1,CNN2,ASAP1,SORT1,MSN,TBC1D2B,APOBEC3G,VPS13B,PIK3CB,VWA8,RB1CC1,CPEB4,CCDC102A,ASCC2,LPCAT1,SRSF9,CDC37,FAM50A,VGLL4,CYB5R1,GSTO1,SDC4,RNASET2,GBP5,MCUR1,EIF3I,VIM,OSBPL9,PLCB3,C1R,SGTB,FBLIM1,CTHRC1,H1F0,MAPRE2,RAB5A,SH3YL1,MTPN,CSK,GPX7,GPI,UBE2Z,PPM1F,TLN1,PTPN11,H…
0.0045809224202325	SEC23B,PXN,VCL,ARHGAP5,ITGB1	VPS13B,MED23,ERC1,SEC23B,ACACA,RIOK1,DYNLL2,SH3GL1,VASP,FMNL3,PXN,XRN2,CCDC102A,VBP1,TANGO2,TEFM,URB1,MESD,RBP4,WDR1,SCYL3,GTF3C4,RRM2B,FOXRED1,EIF3G,USP32,ADD3,HIP1,DTWD2,CDK5RAP2,MMP14,CNKSR1,GPX7,MAP7D3,FBLN2,CGN,STXBP4,TMED3,TDG,VCL,ISYNA1,PTRH2,CTBP1,LMNB2,RAB24,TSR2,MRPL23,MRPS30,FGGY,COL4A1,MST1,SH3PXD2B,CPNE3,TXNL4A,COPG1,TRIM2,CNBP,PTPN2,STX7,TC2N,TNN,LAMA2,ANTXR1,SNTB2,SEH1L,GLUL,RBM7,H…
0.00599116833074609	RABEP1,RABGAP1L,EEA1,GGA3	PNN,GATAD2B,SMC1A,RABEP1,ZNF787,BOD1L1,ZFP91,PCNP,RPS11,PPP1R12C,NDUFA7,RPS26,HGS,SUMO3,TBCA,MARK2,UBL5,SRSF3,CDKN2AIP,TJP3,CHMP1B,EIF4B,RBM14,THRAP3,ARID1A,GDI2,SAR1A,ZC3H13,SETD2,RBBP6,SRRT,TUBA1C,RABGAP1L,SARNP,SLTM,CENPB,UBAP1,PYM1,DENND2D,TAOK1,GATA3,CA12,EEA1,LZTFL1,C1QC,LRBA,PGGT1B,NXT1,IFT140,SYTL4,PDLIM2,EFEMP2,NT5DC2,UGP2,WIPF1,RERG,MORF4L2,LIPA,ZNF385A,UBE2S,DNAJB6,YME1L1,CHCHD3,SEC16A…
4.19805283302087e-05	MAEA,NDUFS6,RANBP9,HTRA2,RANBP10	SRSF3,PNN,HDDC3,ZNF24,RACK1,RPS11,UBL5,SZRD1,EEF1A1,EIF3A,GPX3,EIF3C,MAEA,MRPS10,SMAD5,CLTB,RPSA,TBCA,VCP,CCDC124,NDUFS6,MED21,ZNF787,SETD2,TMEM263,RBM14,CAPZA2,STAM,UBAP1,SUMO2,PCNP,SLTM,MAZ,RTF1,ATRX,CCDC9,RBM6,HEXA,SRRT,SMC1A,MARK3,DDB1,INTS12,RANBP9,RPS18,EIF2S3,HNRNPDL,RPS29,PTBP1,CWC22,SARNP,PPP1R11,RPS19,PSMB4,KLF16,ZC3H13,GNB2,GPX1,GATAD2B,GRN,EFEMP1,CIAPIN1,DES,SNX33,CTU1,IDNK,SERPINA5,S…
0.0060535926931219	SUMO1,SNW1,LRPAP1,RALY,APC,IK	RBMX,ZC3HAV1,GRN,STIP1,PNN,SUMO1,ZNF668,ILKAP,SNW1,GPX1,SZRD1,MYL12A,RTF1,LRPAP1,RBBP6,SON,VPS72,MED8,PHF6,PRKAG1,RPL23A,DUSP3,CCL18,SRP9,ZNF638,COMMD3,TARBP2,SRRT,CHCHD3,SAP30L,SETD2,MFAP1,SLU7,SAFB,RALY,GNB1,ZCRB1,GTF2F1,APC,RPL35A,YY1,TXLNA,SMAD2,SPATS2,MRPS15,GATAD2A,RPAP1,PHF5A,ARGLU1,LSR,DPM1,NUP93,RNH1,NCOA5,BCLAF1,ZRANB2,RPS20,SMARCA5,CHAF1B,GSN,ZC3H18,ELL,MYL9,IK,NDE1,NAE1,SEC24B,CKS2,NO…
0.000229525366631665	ILF2,SRRM1,RALY,UBE2L6,RPLP0,TUBB,HSPA8,KIFAP3	ARID1A,CLTB,ACTBL2,PDIA6,EIF4EBP1,HDDC3,CDKN2AIP,CHMP1A,CCDC93,PCBP2,U2AF2,LSM6,ISY1,MARK2,UBE2A,PTMA,SAR1A,SERBP1,RNF14,TMEM106B,RCHY1,PRRC2A,DPH5,RPLP1,INTS12,FTSJ1,LALBA,YBX3,RANBP9,POLR2D,RNASEL,RFXANK,CPNE2,CDKN2C,USP4,ZFAND6,TBPL1,SMAD3,ILF2,SRRM1,EXOC8,MRPL57,MINOS1-NBL1,CEP57,SLTM,SNX15,RALY,UBE2L6,CD46,RPLP0,ARCN1,RPA3,NMRK1,RETN,RTF1,DDA1,VPS16,EIF3A,UBL5,PEX5,NDUFA7,ALOX15B,WDR26,GID8,…
0.000229525366631665	RANBP2,SNW1,IK,NUP153,CTDSPL2,NUP85,CDC73,CUL1	CELF1,RANBP2,NAA10,RBM10,CPSF4,BUD31,SLC4A1AP,MAN2A1,RBM15,MTA1,TRPT1,ANXA2,SELENBP1,SART1,WDR33,MTR,DCAF13,EPCAM,ZNF326,SNW1,IK,SERPINA5,NUP153,DPP8,CSAD,SUPT5H,KDM6A,CD93,IPO7,NHP2,LRG1,SMC3,YES1,U2AF1,BYSL,CTDSPL2,ILKAP,DDAH2,PSPC1,CREG1,SERPINA7,POLI,SBF2,COX7A2,SORBS1,AGT,GTF2E1,SUSD2,THAP12,CAMSAP3,NUP58,ZBTB7B,NMRK1,NAA15,RDH13,SF3B6,ZNF687,TATDN3,EIF4E,ENPP2,RIC8A,POLR2H,RTF1,CLEC3A,NAT10…
0.000713070938930307	SNRPD2,IK,PRPF6,RBM10,CUL4B,SMARCA5,THRAP3,RBM14	SOD3,ALB,MED8,ALDH1L1,ZNF638,SNRPD2,PDS5A,SPP2,APOH,MARK2,IK,GGT5,UTP6,EIF4G1,GC,MGLL,NID1,FGF2,INTS12,BCHE,GALT,SUPT5H,TIMM29,ME3,EIF3C,XRCC1,LAMA4,TIMP1,PPP1R14A,SART1,COA7,TPM1,DSTN,SEC61A1,LSM3,EDC3,NID2,SULT1A3,SF3B3,CSTF2,CNOT3,NOLC1,PGM5,SNX17,PROS1,PRPF6,NCL,NAT10,C8B,REXO2,SF3B5,DDAH2,RBM10,GPLD1,LYVE1,ERAP2,CUL4B,APOC3,PPBP,YTHDC1,TPM2,PRPF40A,SYNPO2,PTMA,SLIT3,C6,SIN3A,ZFX,RRP1,MMRN2,H…
0.00100532334535831	U2SURP,RBM10,CHERP,CWC15,SF1	PRPF6,EIF3C,SNRNP70,EIF5B,ORM1,U2SURP,DNAJB4,TTR,LYVE1,SFPQ,PNN,IK,CD99L2,RBM10,PGLYRP2,UTP18,HPX,MARK2,PLIN1,F2,CHERP,FETUB,THRAP3,CSTF2,AGT,SMIM12,C2,CDH5,MGLL,SOAT1,CCAR1,BTD,TAX1BP1,HNRNPM,NELFA,APOH,SH3BGRL2,STIP1,NONO,CPNE2,CNRIP1,ELOA,PTMA,TRA2B,SYNPO2,CPSF4,PDS5A,SLC4A1AP,PSMD3,C3,TF,SMC3,SRRT,NUP93,TIMM50,NCL,IGLL1,SRRM2,CSAD,TNS1,TRNT1,LSM3,LGALS3,CRTAC1,CWC15,ALDH1L1,YBX1,ZNF598,FAM96B…
0.00100532334535831	SF3B1,U2SURP,LEO1,SFSWAP,CHERP	PRPF6,ELOC,TTR,SF3B1,PRKG1,DPY30,AGT,EIF3C,EIF4G1,FOXJ3,PPA2,PPM1G,ORM1,TGFB1I1,HPX,MARCKSL1,PTMA,MAX,MYH10,CAMK2G,GSTM4,AMBP,S100B,ZFHX3,ARID1A,ACAN,ATXN2L,NUF2,RNF40,PLAC9,SERPINF1,U2SURP,HERC2,EIF3A,MFAP4,EMC4,FBLIM1,LEO1,NDUFA13,TF,MRPL18,SMIM12,BTD,MED29,SMARCA5,DDX46,SNCG,CSAD,HMGB2,WISP2,RBMX,SART1,CABIN1,RPUSD2,TLK2,SNRPD2,IGF2,TBCEL,STK38L,NCL,THRAP3,ALB,UBE2G2,CANX,APOL3,ASPM,SFSWAP,MYL…
0.00967944465432822	PPIE,SNRPE,SNRPG	TYMP,MTMR14,NAGK,ATP6V1B2,NCF4,TBCA,CAPZA1,RTN4IP1,FCGR3A,OVCA2,RAP1A,RPL29,PBDC1,SUMO3,HOOK2,ZC3HAV1,METTL16,MAN2C1,NSMCE2,DAZAP1,SRSF7,MAIP1,ATXN2L,LACTB,ETF1,CUTC,CD4,SMAP2,FAM96B,FBXW8,SRFBP1,ATP6V1F,RPL22,PPIE,CHCHD3,UNC119,TCOF1,NSRP1,TIMM21,AP5B1,SNRPE,TRNAU1AP,PHF3,SIPA1L1,ANKRD52,HSPA8,PPP4C,C15orf40,BRD4,NDUFS2,PPIA,AP5S1,SGTA,CWC22,NCKAP1,MAK16,MPHOSPH6,CEP44,IRX5,CTNNB1,PBLD,EHMT1,HNR…
0.000151070275931222	PNN,RBM14,SAP18,SP100,ACIN1,SNRNP70,SNW1,PLRG1,SDCBP	PNN,GATAD2B,RPS26,SARNP,RPS11,ZFP91,RPS29,SRRT,TBCA,UBL5,SMC1A,EEF1A1,NFYA,ZC3H4,ARID1A,MAEA,BCLAF1,CLTB,NDUFA7,ZC3H13,SUMO3,RBM14,PCNP,YLPM1,TMEM189-UBE2V1,SAP18,TCOF1,CHCHD3,MFAP1,AK3,LARP4,COA6,INTS12,SP100,PPHLN1,HDGFL2,DCTN1,ZNF460,ZNF143,NAA10,SAFB,SAFB2,YY1,ACIN1,MAPRE3,SNRNP70,CMC1,SNRPG,SH3GLB1,MTX3,YBX1,SLC12A2,ROMO1,AKT1,TACSTD2,OPTN,BRCC3,MYL6,PPP1R12A,SMARCB1,PRPF18,GIT2,XDH,HADHB,TR…
0.00358587761566181	SNRNP70,CHERP,FLNA,SON,SF3B1,SRRM2,SRSF11	CCDC102A,CSRP2,PPP1R14A,TNS1,URGCP,LUC7L3,TNS2,PODN,SULT1A3,DNMT1,ANXA1,ZFHX3,DAG1,BMS1,SUPT5H,SNRNP70,MYL9,SRSF2,SMAP1,GC,NEK7,NUP205,TPM2,DSTN,AHSG,AKAP8,CHERP,CRTC3,SMARCA5,LIN7A,SNTB2,LSG1,PRKG1,PPP1R12C,SMTN,DES,CAP2,FLNA,PPP1R12B,TANGO2,COA7,LIMS2,NDC1,ILK,TPM1,TMOD2,PPA2,BCHE,HSPA12B,EPCAM,HSPG2,PARVA,DNTTIP2,UTP3,SORBS1,FOCAD,SYMPK,SON,FERMT2,SF3B1,SPTAN1,GTF3C3,ACAT1,H2AFV,TPPP,SRRM2,PZP…
0.000528154029159673	RBM14,ZC3H18,RBMX,YTHDC1,SRRM1,SNW1,LARP7,CUL3	ZFP91,PNN,MARCKS,RBM14,YLPM1,PRRC2C,RPS26,GATAD2B,MAEA,SRRT,PCNP,MARK2,SMC1A,ZC3H18,THRAP3,SERBP1,RPS18,ZC3H13,SUMO3,ZC3H4,IDNK,TACC1,SUMO1,ZMYND11,RBMX,CHMP1A,CHD2,BRCC3,OARD1,YTHDC1,SAP30,EZH2,GNB1L,CHCHD3,RABGAP1L,SRRM1,F11,SNW1,SLC16A3,INTS12,TRMT1L,C1QC,U2SURP,BRD9,POP1,RAB10,GRHL2,PHYH,STX17,CHMP7,LARP7,ATXN1L,RBMXL1,PDCD6IP,CD46,CTCF,LBH,HECTD3,ITFG1,HGS,POTEF,FUBP3,PABPN1,F5,CHMP5,VKORC1L…
4.10224294368149e-06	SFPQ,ILF2,CUL4B,PPP1CC,RBMXL1	BOD1L1,MARCKS,THRAP3,ZFP91,ZNF787,SUMO3,PCNP,EIF4B,MFAP1,SERBP1,ZNF460,PRRC2C,TCOF1,SLTM,EIF3A,SAR1A,DNAJC8,PNN,HGS,BUD13,SMARCB1,NFX1,RREB1,TBCA,ZC3H4,NDUFA7,ZFAND3,MARK3,ISY1,C19orf47,SRFBP1,VAMP8,SLU7,SFPQ,UBL5,NOL8,ZNF24,RBBP6,GTF3C6,EZH2,RWDD1,UBE2O,SIPA1L1,U2SURP,RPUSD2,ILF2,YTHDC1,EEF1AKMT2,CUL4B,MRPL17,STAT6,RBMX,UBA1,RPL28,ACTL6A,MBD1,DEPTOR,GIT1,MRPL47,KIAA1191,DDB1,TMTC3,PRPF8,SLC16A3,…
0.00295595877741064	RCSD1,CAPZB	RPL32,BPIFB1,CARTPT,LSM6,PPP1R18,DCTN3,RPS11,DBNL,SETD2,LSP1,TANK,PHF5A,RBM14,PPP1R11,ROCK1,ELL,SELENBP1,CCDC93,PPIL1,RPL31,ATXN2L,POLR2A,NUBP1,MAEA,IK,SARNP,ISY1,COTL1,STX7,EEF1D,ZC3H15,TRIP10,RPS18,RBM26,SETDB1,AGL,FMNL1,TAOK3,FBXO18,GGA2,SEPT8,CCDC50,PPM1G,RPS27L,AHNAK,RPL19,TRIM32,FBXL6,SNX9,PAG1,EMILIN1,PEX6,ADPGK,TTC9C,AKAP8,AP2M1,TNIP1,NDUFAF2,MTA3,RCSD1,LAP3,COA6,KLC1,PBX1,CLSTN2,UHRF1BP1…
0.000608135317245258	ELAVL1,AP2M1	TRIM25,URGCP,EPHB4,SNCG,TACC2,DPP8,PPP2R2D,YBEY,TPM4,ELAVL1,GSTP1,MYL9,CGNL1,RDH14,PPFIBP2,OTULIN,SMIM20,RBM45,APEX1,RPS23,GLB1,RPL36,PTRH1,FBXO30,CROT,RETN,HDHD2,RIF1,ATAD2,MBL2,EHMT2,OAT,MAF1,TUBA1C,GNAS,PCOLCE,LYSMD1,MNAT1,ZNF24,MED24,TSKU,CNN3,GPI,NAA40,C8orf82,KRT17,STK24,CCDC88A,PPIE,CALML3,RNASET2,CNOT7,KRT81,DNAL1,NDUFA9,FBXL8,EIF2S1,CNOT11,LBR,PLBD2,UQCR10,GXYLT1,IDI1,FAF1,JCHAIN,RHOT1,M…
0.00140924936565228	RBM8A,RNF113A,TERF2	DR1,U2AF1,DPY30,FAM96A,RPL10A,DBR1,GTF2E1,PHC2,SUPT4H1,SNRPN,HDAC4,MSL3,DNAJB4,CYB5R3,NONO,FAM207A,CSK,CHAD,BUD31,RBM8A,PFDN6,CWC15,DIP2C,RNF113A,MORF4L1,DNAJB1,EMC2,POLR2F,FAM129B,TOP2B,ZNF385A,NFKBIE,KDM4A,RAB35,RAPGEF1,TAF7,TIA1,IL4I1,SNTA1,KIF16B,DDX46,SAP30,DOCK2,DDX23,POLR2B,COG2,CPEB2,CETN2,AFAP1,BABAM2,SLIT3,NOSTRIN,RNASEH2C,NES,TSR2,MYADM,QRICH1,LIMK1,PRPSAP1,ERF,GMFG,THOC1,NAIP,RPRD1B,W…
0.00414337126977096	RNF213,PTPN1,RNASEH2B	RNF213,PTPN1,BRPF1,CADM4,GALK2,TRAFD1,RPSA,XAB2,RNASEH2B,ANK3,EIF2A,GRHL1,CTNNBIP1,PLG,CETN3,EVL,BPI,RSRC1,ILKAP,NEURL4,PSME2,COIL,SERPINA4,TNK2,ADAR,TUBB3,FMOD,CNTRL,ZC3H7A,DOCK5,MYL9,PSMA1,ALDH1L2,GDI2,DRG1,ATF1,GRK6,SERPINA10,CLINT1,PROM1,CRISP3,GBP4,ETFRF1,C17orf80,RABAC1,ANXA3,DNAJC19,S100A12,CLTA,SHMT2,POP7,RPS15,FKBP15,TPD52,NAMPT,ATP2A2,RANGAP1,HDAC7,WDR33,FAM192A,DTX3L,LIG3,PDCD6,MTRR,MA…
0.00854121907456476	RNF214,LAGE3	RBBP6,RBM14,BUD13,MEN1,EIF3C,PRPF6,MARK2,PNN,ARID1A,TAB3,BCLAF1,NKTR,ZNF638,RBM6,WTAP,CLCC1,RNF40,UBE4A,ZC3H15,RNF214,CHD4,EIF1B,SESTD1,POLR2A,PLRG1,CCDC12,ARHGAP21,PRRC2B,TANGO2,PPIA,TDRD3,ATRX,MRPS15,SMARCA4,APOC3,RBM15,SMIM12,MEPCE,CENPB,BRD4,ZNF24,ISY1,PTPN18,KANSL2,ZNF326,ZNF787,ELL,DNAJC2,CABIN1,TRMT1,NEURL4,ZFAND6,PARK7,CARD16,GRIPAP1,ZC3H14,TPRG1L,THOC2,UFSP2,GSTM5,ANKS1A,RPS16,KMT2A,COMM…
0.00231855167730856	WWP2,MED24,XPO1,OFD1,MED21	WWP2,HECTD3,MRPL34,POLR3D,CINP,PHGDH,COPRS,OTULIN,YLPM1,RAB32,ZC3H18,SHKBP1,STX17,GINS2,TOP1,GSS,BORCS6,PTPMT1,MRPL27,HSPA8,SOS1,CFL2,GRPEL1,NDUFA11,NUDCD1,CCDC50,PFN2,SF3A1,RETN,AUH,FAH,STK25,SCGN,ARID1A,TMEM106B,SLC25A11,CUEDC1,VPS13A,SDHAF2,CPN1,ROCK1,SRRT,TUBA1C,MAPK9,KRT81,GHDC,ARHGAP12,SVBP,PTBP1,CYR61,PGGT1B,CDK17,MED24,RNF146,SELENBP1,ATP6V1F,DUT,TOM1,TYW5,BAG5,NAA50,MCCC1,LIMD1,TUBB,MYL6…
5.69800515947886e-06	RPL24,RPS15A,RPL7A,RPL13A,RPS6,NOC3L,RPL17,DDX56,CEBPZ,RPL6,DCUN1D1,CUL1,RPL3,RPL27	RPL24,RPS15A,UTP14A,RPL7A,RSL1D1,FGGY,GGT5,WDR36,CARS,PDCD2L,RPL13A,RPS6,APPL2,C11orf54,NOC3L,FAM208B,PBLD,TBRG4,ARAP1,FMR1,RPL17,RIOX2,YIPF3,CCP110,RARS,ME2,NMD3,DDX56,FBXO4,EIF2B4,TIA1,IRAK1,RNF20,GART,PIK3C2A,MAP4K3,CEBPZ,CLK3,KIF11,FAM49A,CEP131,TRMT1L,RBMX2,AIFM2,RPL6,DCUN1D1,YIPF4,MAD2L1,NGDN,LRPPRC,ANP32E,PLXNC1,NKRF,CHTF18,ABCE1,FAM111B,RNGTT,NOC4L,TSR1,WDHD1,HMBS,WDR18,UBE2G2,MAP7D3,SGSM…
2.42091321583415e-11	RPS11,RPS26,CNBP,RPS3A,RPL28,RPL31,SRRM1,RPS23,RPS5,RPS15A,RPL18,RPL35A,RRP1B,RPL23A,RPL10A,RPL5,RPL32,CUL1,RRP8	GATAD2B,RBM14,PNN,PCNP,SLTM,RPS11,SRRT,RPS26,ARID1A,GATAD2A,PPIL1,CNBP,RPS3A,RABGAP1L,PRRC2C,RPL28,SFPQ,ZFP91,UBAP1,TCOF1,PTBP1,COMMD3,INO80E,ZC3H13,MARK2,GAPDH,ATXN2L,SLU7,PHF5A,PPIE,EIF1B,RRBP1,RPL31,EIF3C,YBX1,SMIM12,HGS,SERBP1,NDUFA7,OARD1,DPH5,SRRM1,SMARCB1,WDR46,RPS23,MARCKSL1,TG,KLHDC4,RPS5,RPS15A,PNISR,TRIP12,PPM1G,TOP1,ZC2HC1A,IFT122,ATP5J2-PTCD1,RPL18,CMC2,ZC3H14,NFXL1,VKORC1,SNW1,RETN,…
2.0310864161181e-05	NOP56,RPS3A,RPL5,PES1,RPS5,RPS25,ESR1,NCL,RPL12,PABPC4,DDX24,CAPZA2	DDX3X,NOP56,TCEA3,NUP93,DDX21,RPS3A,RPL5,MAEA,BCAS1,PES1,RPS5,MFAP4,EIF4G1,GALNT1,RPS25,SUMO1,SH3BGRL2,STC2,TTC4,AGR2,LBR,DEPTOR,SERPINB6,FUCA1,ESR1,MCC,PCBD2,SUMO2,MGLL,EDC3,IL6ST,STRN3,MARCKSL1,GFRA1,NCL,ITGB2,GRK6,FCER1G,TOP1,IGF2R,ELOC,PKIG,SLC25A6,WDR35,SPR,MOCS2,DPM3,BAZ1B,PKIB,MARK2,EEF1A2,TOM1L2,MAPT,FAM98C,COA7,ZC3H15,GAMT,CST3,RSL1D1,RPL12,TAPBP,PCBD1,EEF1D,RNF113A,PABPC4,NRBF2,GSTM1,AT…
0.00679437390502778	RPL35A,RPS18,RPS5,RPL18,C8orf33,RPS19,RNF2,NOLC1	SUMO3,RBM26,MRPS15,RPS29,NUBP1,COMMD10,RPL35A,SMC1A,FCER1G,NDUFA7,PTBP1,BLOC1S5,MARK2,NOL8,SLU7,SARNP,FCHO2,KDM6A,MAZ,BUD13,TCOF1,LANCL2,CLTB,PSMA5,PPIA,ABHD14B,ZC3H11A,GATAD2B,SLTM,IK,ZC3H13,PHF5A,RBMX,FAM76B,ZNF638,SETD2,RPS18,UQCRQ,DHRS13,HOMER2,YTHDC1,ANXA9,C1QC,RPS5,CHMP1A,RPL18,STRIP1,C19orf53,FBXO28,AP4S1,MLEC,ENGASE,GNG12,ZNHIT2,SRSF3,ASCC2,ERC1,MTX3,DCP1A,CHMP1B,TRAPPC2,ATAD3A,CCDC93,C7o…
0.00145196545144975	RPS11,RPS26,RPS20,RPL31,RPL18A,RPL32,RPLP2,NELFB,RPL13	GATAD2B,RPS11,SUMO3,CDKN2AIP,PPIL1,RSRC2,EIF4EBP1,RBM14,HDDC3,RPS26,RPS20,SLTM,SRRT,RPL31,PHF5A,LRPAP1,RBMXL1,WTAP,PRRC2C,SRSF3,ZC3H14,SUMO2,HS1BP3,C5orf24,SPATA5L1,SAFB,RPL18A,EIF2S3,DNAJC8,CLTA,MARK2,DGUOK,GATAD2A,GDI1,ZCCHC6,SFPQ,COX17,INTS12,SLC16A3,MAEA,SMAD5,ATXN2L,EIF3C,PDS5A,COMMD3,MARCKS,UBAP1,PCNP,RPL32,CDA,CRISP3,RBMX,MED22,EXOSC6,RPLP2,UBTF,PRTN3,C5orf51,MTA1,MRPS2,MRPL14,ATP5E,MRPL27…
2.09543983697432e-13	RPL3,RPL23A,RPS6,RPL18,RPL36,RPL27,RPL17,RPL5,RPL35A,RPS13,RPL37A,RPS8,RPL27A,RPL18A,RPL13,CHCHD2,CAND1,RPL4,RPL13A,LARP7	RPL3,RPL23A,CHTOP,RPS6,RPL18,RPL36,PPP1R11,RPL27,RPL17,STK24,ERCC3,ZNF384,RPL5,PRPF18,POLR3E,PITHD1,VTA1,RPL35A,RPS13,RPL37A,C7orf25,CDH13,RPS8,RPL27A,GSPT1,RPL18A,TATDN3,BOLA1,TRIM56,MRPL24,TCAF1,CCDC149,STIP1,POLR2J,RPL13,DCUN1D5,MRPL14,RSBN1L,COPRS,OFD1,CHCHD2,DAPK2,MIB1,NIPSNAP2,CAND1,KDM3B,PMPCA,DNAJC1,MRPL32,PNISR,DDX49,FOXJ3,RPL4,DHX37,RPL13A,CCDC91,PRKRIP1,UQCC3,DTX2,UBE2F,KPNA3,PREPL,PAR…
6.62498384357306e-05	RPL18,RPL23A,RPL37A,RPL35A,RPL28,RPL34,RPL15,RPS3A,ILF3,PPAN,RPL14	CTSF,ACTR1B,NOL7,SELENBP1,STIP1,BPIFB1,WAC,RGS3,RPL18,RPL23A,NIFK,SRP72,OSGEPL1,RPL37A,NOP14,ZNF384,C10orf76,RPL35A,EXOSC8,BZW1,CST3,RPL28,UTP18,PKN2,TXLNA,TIMP1,NR2C2,TCOF1,RPL34,NMRK1,DCUN1D5,CCDC124,DDOST,RPL15,CUTA,NAT1,RPS3A,GTF2H3,G3BP2,FLYWCH2,DGKQ,PNO1,MOB1A,STRBP,COG2,MRPL57,RNF40,CSTF2,YTHDF3,SMCHD1,LAMB3,WDR11,RFC2,NUFIP2,CAPNS1,GNG5,LARP4,ARL3,BUD13,IVNS1ABP,RFXANK,ZFP36L2,ILF3,CRTC1,…
0.00721244950505016	RPS26,RPS11,RPS29,RPS5,RPL28,RPS19,ZC3HAV1,RRP8	ZFP91,PNN,MAEA,GATAD2B,MARK2,SMC1A,PRRC2C,SUMO3,PCNP,NDUFA7,TBCA,RBM14,CLTB,SRRT,RPS26,YLPM1,RPL35A,ATXN2L,SERBP1,MARCKS,RPS11,RPS29,FNBP4,MARK3,ARID1A,RPL29,THRAP3,RBM6,CHMP1A,NUDT16,RAE1,BPIFB1,SUMO1,NFX1,TANK,COA6,RPS5,RPL28,RBCK1,C19orf70,SELENBP1,CLIC6,MAP7D1,MICALL1,ROMO1,UQCR11,STRIP1,PTBP1,PPM1G,RPS19,TOP2A,RRP1,CSNK1A1,COA5,TATDN3,NAP1L4,HLCS,TCOF1,ATXN3,NDUFC2,EFHD2,CAPNS1,KIFC1,SLC1A5,…
0.0088930904705606	RPS26,MEPCE,RPL28,RPL35A,RPL34	MARK2,PCNP,ZFP91,PNN,BOD1L1,SERBP1,PRRC2C,EIF3A,NDUFA11,SRRT,ACIN1,THRAP3,ARID1A,SDE2,TMEM263,ZNF787,CWC22,ELOA,SUMO3,HGS,EIF4B,ZRANB2,SMC1A,LBH,RPS26,POLR2D,RBM14,NSRP1,ZC3H4,TDRD3,RPS19,MARCKS,SETD2,FNBP4,SMAD5,MEPCE,YBX1,AP5M1,POLR2E,GATAD2B,TCOF1,RSRC2,TPRKB,RPL28,TRIR,SRSF7,EFHD2,POLR3C,RPL29,RPS5,NUDT18,PPAN,SDCCAG3,ENPP2,F11,BRCC3,C1QC,SNX2,HDGFL2,CHMP1B,MED8,ITIH3,RAVER2,ANKZF1,TM9SF4,ZNF…
0.00211893539028298	RPS11,RPS20,RPS19,RPS15A,RPS26,EIF3A,RPL19,HUWE1	SARNP,RBM14,PHF5A,RPS11,GATAD2B,FCER1G,MARK2,RPS20,PNN,CARTPT,ELL,RPS19,LSM6,ARL6IP1,RBMX,SUMO3,ATXN2L,SRSF7,USF2,RPS15A,UQCR11,EIF2S3,CDKN2AIP,RPS26,TAOK1,RSRC2,GATAD2A,EIF3A,ATP5L,DARS,SUMO1,MAN1A1,ERAP2,STIP1,YTHDC1,NAA10,CFDP1,PLCL1,ERLEC1,INPP4B,VASP,REXO2,MGLL,EFHD2,BIN1,UBXN7,TP53RK,NMD3,CHMP1A,GBF1,TRAPPC6B,RAB2A,UBE2V2,EPHB3,PLTP,SMNDC1,POLR2A,FKBP15,TIMMDC1,ANKFY1,TANGO2,SLC7A6OS,RPL19,…
0.00825947013994772	RPS15,RPS3A,RPL35A,ZNF598,PIH1D1,RPS19,RPL22	CYR61,NDUFA5,CHCHD4,NOP56,PPP1R2,GPS2,PEBP1,LOXL2,PHKG2,USO1,SRRT,AFF4,ARID1A,PSMA6,NUDT15,RETN,GPALPP1,ACTL8,CD2AP,ZFAND2B,CUEDC1,USP16,C18orf8,RPS15,MVB12A,SAFB2,SUMO2,APOC3,TUBA1C,PHGDH,GHDC,POLR1C,ZC3H18,TPM4,FPGT,UNK,ZC3HAV1,WDR46,RPS3A,BCKDHB,SLC16A3,RNF214,RPL35A,SVIL,PCNP,RBM14,COMMD3-BMI1,SDCCAG8,SAR1A,CLTA,YLPM1,MRPL33,MYL6,PCBP2,TMEM63B,VPS28,MRPS24,ZNF598,DDB1,CLTB,HMGCL,PEX6,YIPF5,GA…
0.00127028954377046	RPS2,RPS3A,RPS3,DDX3X,RPL30,RPL17,ZNF598,RPL12,RPS23,CHERP,U2AF1	LSP1,RPS2,SPAST,NAT1,CPSF4,RPS3A,EEF1D,RAPGEF1,NFKBIE,RPS3,DDX3X,MTA2,NUDC,FAM103A1,CSAD,TTN,POLR2F,RPL30,RPL17,DBN1,COLGALT1,NBEA,PDK2,UBE3B,HCCS,ECHDC2,SDS,NACA,ZNF598,NSA2,MOSPD2,INTS9,RPL12,EIF4G1,EIF3G,SUPT4H1,BUD31,PLRG1,AKAP13,RPS23,CHERP,PI16,TANGO2,NMT2,SMNDC1,GP2,RBMS1,GLIPR2,GRPEL1,IFT80,ZNF280C,WDR46,DRAP1,GPR107,TAB3,CAPRIN1,SNTA1,YTHDF3,PTK7,FHL3,U2AF1,ZC3HAV1,CHTOP,SERPINA5,STK17B,…
0.00254576347950971	RPS15A,EEF1A1,TUBB,ATP5A1,RPS26,RPL22L1,RPS5,HNRNPA1,NUDC	RPS11,SMC1A,PNN,RPS15A,RCOR1,SUMO3,EEF1A1,U2AF2,UBAP1,TBCA,MARK2,SLK,GPATCH8,RABGAP1L,ANAPC4,NFYA,YBX3,MARCKS,HNRNPDL,RNF126,SAR1A,CDKN2AIP,TUBB,CLTB,ATP5A1,PCNP,SMAD5,PPP1R12A,HDDC3,RSRC2,ZC3H13,ENOPH1,UBL5,PPIL1,TRNAU1AP,NDUFA11,RPS29,RPS26,GATAD2A,PSMD12,MAIP1,FMNL2,NHLRC2,IL6ST,ATL2,LIPA,EXOC7,FAM98C,RPL22L1,NPRL3,RPS5,WDR54,CELSR1,PDK2,ZNF384,EIF3D,CEP44,TDRD7,SRPRB,IDNK,OLA1,COQ8A,MTFR1L,ZF…
4.31309446001047e-05	RPL17,RPL6,RPL13A,RPL32,RPL37A,RPL14,RPL3,RPL27,RPL35,NOP9,RPS6,RPS27L,SIRPA,NSA2	NOP16,DCTN3,RPL17,RPL6,RPL13A,RPL32,FAM213A,CMTR1,ROCK1,PALM,LARS2,ARIH1,UPRT,THRAP3,UQCC1,RPL37A,EXOSC6,CHKA,RPL14,AFDN,RUFY1,RIPK1,RPL3,CDKN2C,PEX6,RPL27,FNBP1,ARGLU1,LUZP1,FAM111A,ERH,JUP,ARSB,RHPN2,NUP93,DAPK3,PTBP2,IFIT3,RPL35,MCRS1,TPM3,MUC2,ITPKC,TTI1,TRIOBP,NOP9,AP3M2,PEX1,C8orf82,PMS1,LUC7L,RPS6,UBA7,TRIM26,DHX57,EEF1AKMT2,SH3D19,CALML3,FMNL3,FBN1,RPS27L,TMLHE,HSD17B12,RPAP3,CAPZB,PPP1R1…
7.33352494439816e-08	RPL17,RPL18A,RPL23A,RPL5,RPL27,RPS26,RPS3A,CHD4,RPL32,RPL13A,RPL37A,RPL13,RPL10,RPL31,RPS11,RPL35A,RPL35,RPS5	RPL17,RPL18A,RPL23A,RPL5,RPL27,RPS26,RPS3A,TXLNA,CHD4,RPL32,EIF2S3,NOP14,RPL13A,EIF3C,RPL37A,RPL13,OSBPL11,ELL,RPL10,FAM136A,EIF5B,RPL31,NSDHL,PPAN,SMARCA4,SRP68,RPS11,RANBP2,ACTA1,SMARCA5,ZNF598,CREB1,REXO4,DYNLT3,CHTOP,RBM10,FTSJ3,RPL35A,UTP11,PLIN1,ADNP,MSL1,SMOC2,RRP1,CSDE1,CIAPIN1,NAA10,LIMD1,SYF2,RPL35,REEP3,HPX,CNRIP1,SCAMP2,PTAR1,LAMTOR1,YIPF5,PARD6B,NUP93,TRMT1L,SLIT3,AGT,CHAF1B,PPM1G,NF…
0.00721244950505016	RPL18A,RPS15A,RPL32,RPS11,RPS26,RPL37A,RPL31,RPS21	CHGB,RPL18A,PHF5A,SCGN,GATAD2B,ELL,MTA2,ZFP36L1,RPS15A,LSP1,RPL32,MAD1L1,PXN,INO80E,INTS12,RBMS1,HIST2H2AB,RPS11,PLRG1,PCDH1,CHCHD1,DEK,PRCC,FOXJ3,RRP1B,ZC3HAV1,RPS26,EIF2S3,PPM1G,NUBP1,FCER1G,CHCHD3,GTF2F1,TAB3,MBP,WASF2,CARTPT,PIP,LRP2,TXLNA,IRF5,WDR35,DDB1,TRA2B,PEBP1,HSD17B8,GBP1,SYBU,RANBP2,EED,TTC9C,KIF2A,RPL37A,RPL31,TRIP10,RNF113A,RPS21,SVEP1,SUMO1,TIMMDC1,OTUD6B,TAF5L,CSAD,PKN1,LIG1,FAM1…
0.00599116833074609	EEF1D,RRBP1,PES1,CUL3	CHCHD3,GAMT,ZC3HAV1,GATAD2A,LRPAP1,EEF1D,CD59,EIF2S3,SCRN2,ABCF1,HDHD2,RRBP1,ELP2,CNOT10,EIF4G1,INTS12,ARL6IP1,TOP1,RPS11,SRP72,UBE2V2,ISCU,FNDC3B,TMEM214,STC2,MIB2,NKRF,LANCL1,M6PR,CSDE1,PES1,FCER1G,SNW1,SMARCA4,PEBP1,EEF1A1,TRIOBP,MAEA,SART1,WNK1,TIMM9,SCLY,PISD,CIAPIN1,ABHD14B,LUZP1,PHF5A,MTA2,CMC4,UBL7,MTFMT,CUTA,SNX2,TLE3,RAB32,F11R,CLUAP1,MAGED1,DGKQ,GABPA,PRKAR2A,PTPRJ,USP47,MBLAC2,MAN2A1,…
0.00265037425542424	RRP12,RPL5,RPL10,CHD4,ESR1	EIF3C,PPM1G,SURF6,SF3B1,OSBPL11,NOP14,RAB33B,MOB1A,C19orf47,ESYT2,RRP12,ASCC3,ATP5D,KIAA1143,RPS26,WDR45B,RPL23A,FTSJ3,EMC3,UTP3,VAPA,MYL6,LGALS3BP,PRPF6,LIMD1,BZW2,UFL1,NBEA,NSDHL,RPL5,RPL26,POLR2A,CCT8,ITPR3,RPL10,TRAPPC2,GATAD2B,EBNA1BP2,TOP1,M6PR,LMAN1,RALY,TXN2,DNTTIP2,EIF1,PMF1,ACSS3,ATL3,TXLNA,HIBADH,TMEM189-UBE2V1,PTMA,DHRS11,RAB10,ATL2,LAMTOR2,SMARCA5,PDCD11,CHD4,SEC22B,PDS5A,TUBB4A,MGRN…
0.000789721831967183	RRP1B,TOP1,PES1,RSL1D1,ALYREF,HNRNPA1	RRP1B,EIF3C,RRP1,RAB1B,TOP1,PES1,PBLD,MYBBP1A,NAT10,SPR,EIF5B,SEPT2,MRPS15,ABHD14B,RPL13A,PPM1G,SMIM12,RPS3A,HIBADH,PRPF6,GOLGA5,NOC2L,NAT1,NIFK,MAK16,AUH,HCCS,RPL32,MRPL22,ACTR3B,NEK7,SPINT2,NSA2,CTCF,RAB10,GRHPR,NUDT18,C19orf47,REXO4,GATM,TMEM214,EMD,M6PR,MARK2,EIF2S3,ELOA,PLCG1,NOP14,VAPB,NSDHL,CSAD,STX5,RPL10,CDK17,RPS15A,UTP18,CNDP1,TRIM4,ARIH1,SH3BP5L,DIEXF,CIAPIN1,LSM4,HMG20A,AHSP,PRPF8,UR…
0.000289495258072599	NOP14,DKC1,RRP8,RRP12,GNL2,RBM28,RPL32	NOP14,DKC1,PRKRIP1,DNTTIP2,NOL7,FBXO21,RRP8,INTS5,DAPK1,SPG21,PLRG1,SNRPB2,MRPS24,SERPINB10,CUL4B,DRAP1,NOP16,DDX56,PRPF6,ELL,HNRNPC,UQCC3,SAP30L,RRP12,MED27,INTS12,INIP,FRMD6,THOC3,TPD52,ZNF207,NSA2,MED20,HIRIP3,CCNT1,CHD4,CCDC86,PCYT1A,GNL2,SRP68,TP53BP2,CCDC50,CDV3,MFAP1,MRPS12,ALYREF,COMMD3-BMI1,IMPA1,UBL5,CDA,HECTD4,RPS15A,GTF3C2,RBM28,GRPEL1,LENG8,CNP,CRISP3,PFKFB3,KRT81,MKL2,PPA2,NHLRC3,MM…
0.000289495258072599	RRP8,ZC3HAV1,DKC1,FXR1,NAT10,HERC5,GNL2	TMOD1,RRP8,PIGR,PCYT1A,SART1,MYH11,SERPINA10,ZC3HAV1,CADM4,KDELC2,ANXA5,NAA10,SERPINE2,SEPT2,APOC4-APOC2,DES,DKC1,MED27,LARP4,MTMR2,FXR1,SRPK2,NUDCD3,SOD3,FRMD6,PON1,OAF,MKRN1,ROBO1,SH3D19,F2,TANGO2,ESRP2,F10,RBM25,SF3B1,CD93,RARRES2,EIF3G,PPM1G,CA2,PRG4,TNFAIP3,SUSD2,CAPRIN1,KPNA6,DCAF7,UBE2D1,PITRM1,POF1B,ZBTB8OS,STRBP,FAM83H,TAF6,TSEN54,SERPINF1,PALMD,TRIM2,MGA,NAT10,KIF3A,USP3,MRPL48,STARD13,…
0.00115703391022941	RSF1,SMARCA5,MARK2	RSF1,APOC3,PRPF6,SF3B5,F13B,SFPQ,FETUB,SERPINA10,CLNS1A,CRISP3,ORM2,NARS2,ORM1,NELFB,SMARCA5,PIK3R4,TF,GPLD1,EMSY,TLN2,MARK2,ERLIN2,CNOT9,KDM2A,HPX,FBXW2,FBL,LRBA,UBL4A,SRRM2,LSM3,TMOD1,CSTF2,MCAM,EIF3C,BOLA3,RRP1B,C3,SERPINA7,CP,AKR1C3,PPM1G,AAMDC,CENPB,GAB2,APOH,SNW1,RANBP2,SMIM12,RSU1,LUC7L3,PDS5B,ITGA6,FAM136A,FERMT2,THRAP3,RNF169,TRRAP,MRPS30,DTWD2,BAZ1B,RER1,SCRN1,PIGT,RBM25,ADNP,ACTR8,DCAF…
0.00115703391022941	RSF1,SMARCA5,PHIP	RSF1,LEO1,RBM10,SMARCA5,PGLYRP2,EIF3C,SERPINA5,LYN,AOC3,SERPINA3,MGLL,SMNDC1,SERPINA7,F2,PKP3,SLIT3,ALDH1L1,FAM168A,G3BP1,AKR1C3,CD209,ARFIP1,GPX3,TBC1D13,COPS7B,CNDP1,SHROOM2,UBE2G1,PA2G4,TALDO1,PRTN3,RAB1B,RBM25,TTR,EHD2,RARRES1,ZCRB1,CAVIN2,VCPIP1,NDUFB1,MPHOSPH6,SNX33,TBC1D10B,GSTM3,MED25,NDUFA13,LUC7L3,ATXN2,C6orf132,S100A4,CNRIP1,SERPINA1,NASP,HNRNPA1,SON,AGT,PAK2,ELL,SYNE2,CUL3,KLC2,SNUPN,…
0.00115703391022941	RSF1,SP1,SMARCA5	PNN,RSF1,SMC1A,ARID1A,SARNP,SRFBP1,CLTB,GATAD2B,RPS29,RPS11,CLNS1A,NDUFA7,SP1,AAMDC,SRSF7,RBBP6,SMNDC1,HDDC3,SDE2,SETD2,ZC3H13,NAA10,MARK3,PSMD4,HERC1,PPP1CA,SAP18,ZC3HAV1,ADNP,CTTNBP2NL,GOLGA3,BTK,DCTN1,HNRNPM,PAK1,WIZ,HADHB,ZC3H4,PIK3R4,GSTM3,BECN1,RPS27L,LSM7,DNAJC25,UBFD1,AP2S1,TPPP3,RIOK3,SDCBP,TMEM189-UBE2V1,FUBP1,ENDOD1,NFKBIB,TERF2,FCGBP,MTMR2,RASA2,NKRF,TIA1,CA1,SYNE1,AK3,P3H4,SMARCA5,SN…
0.00115703391022941	MARK2,RSF1,EZH2	SUMO3,PHF5A,LBH,SMC1A,RBM14,VEZF1,RSRC2,RBMX,ARF4,RPS19,RPS11,SRSF3,PPCDC,GATAD2B,GATAD2A,MARK2,EHMT1,INTS12,RPS20,ELOA,GSTM5,ASNA1,RPA3,IK,HSPB11,USF2,GPX1,ZNF787,POTEF,RSF1,PRPF38B,NARS2,USP33,HNRNPM,CSN2,EZH2,ISY1,SNTB1,EMSY,ADSSL1,TIMM8B,TRMT1L,MAPKAPK2,GATAD1,YTHDC1,SRSF2,DEF6,RABEP2,MORF4L1,HMCES,P3H4,PRPF6,RNASEL,STARD7,LALBA,SERPINB6,ROCK1,KNOP1,ILKAP,PIK3C3,PDLIM5,ACTA1,FAM177A1,DAB2IP,C…
2.94141189940629e-05	RSL1D1,NOP2,RRS1,NOP56,RRP1B,LARP7,NIFK	KNOP1,RSL1D1,EIF5B,EBNA1BP2,PES1,NOP2,RPL5,THUMPD3,TOP1,RPL18A,CEBPZ,RPS3A,ABCF1,PPM1G,NIT1,UTP6,EDC3,AGT,PAK1IP1,FTSJ3,EEF1D,MRPS5,PHF5A,RRS1,TIMM17B,RPP38,CD3EAP,ZC3HAV1,EMC4,PLTP,MTX1,EML2,SURF6,NOP56,ARAF,HCCS,ZMPSTE24,NOP16,WDR36,DDX10,PIP,NOP14,CHTOP,RRP1B,BZW2,RPL32,SLC4A1AP,BAZ1A,MYL6,ZC3H15,DDX3X,WTAP,FAM136A,SCAMP2,NAT1,COA7,DIABLO,SSBP1,LARP7,DDAH2,NUBP1,CLP1,CPSF4,LYVE1,INTS5,NIFK,ATR…
0.00201808204555335	RSL1D1,NCL,CUL1,FBL,COPS5	SAR1A,CERS2,SMARCD2,MAP7D1,REEP4,MRPL33,AP1B1,SLC16A3,RSL1D1,HM13,POLDIP3,ARID1A,UBE2I,LIMD1,PSMC5,NAPG,EMD,INTS9,NCL,CHD8,APOC3,RPL35A,ADAM17,HYOU1,SF3A2,GPALPP1,ZFP36L1,MRPS12,DCTN6,ST3GAL1,ZFAND2B,C9orf78,SUMO1,SEC62,RNF113A,MRPS24,NOM1,VPS28,CPD,RBM26,SNAP29,RPL22,SAMD1,GSTK1,TMEM109,NOTCH3,PHF5A,PEX6,KANK3,HIST1H3D,SETX,DCTN4,ZC3H18,TUBA1C,RHOB,AZI2,SCGN,TWF1,TAOK2,PRKRIP1,SCAMP1,PAPD5,PHF21…
0.00519169714645069	RTKN,RASAL2,PLEKHA5,PHLDB2	USP36,CWC22,MFAP1,RBBP6,MARK2,RPS26,PTBP1,DNAJC8,RPL32,C19orf47,MRPS15,NOL7,LUC7L2,RPL26,EIF3C,DIS3L2,RTKN,SON,RPL27A,SYF2,ATRX,INTS12,PRRC2C,FCHO2,PDS5A,RPSA,MAN2B2,SURF6,TTR,IK,SARNP,NFXL1,PCBD1,TCOF1,RPL31,TBPL1,SETX,NOL8,LTBP3,STIP1,SCAMP2,ELOA,ELOC,RTFDC1,ZNF668,CLCC1,ANXA9,DDB1,TAF5L,SCGB2A2,ARID4A,CCT5,UTP20,CXCL12,PPP1R14B,GOLGA3,TLE1,MRTO4,DMXL1,CD14,ZBTB20,CRKL,FUT11,LENG8,MDH1,CPVL,AFA…
0.000108497751810937	ZC3H18,SAP18,SAFB,SRSF7,SF3B6,CSNK2A1,SRRM1	THRAP3,SLTM,PCNP,PNN,ADRM1,ZC3H18,SFPQ,MAZ,SAP18,TCOF1,ZC3H13,NOLC1,CHMP1B,EIF4B,YLPM1,DUSP3,ACTBL2,SERBP1,PPIL1,CNBP,SAFB,ZRANB2,COMMD3,YY1,SRFBP1,ZNF787,NUDT16,SRSF7,REEP5,WDR33,UBQLN1,ZC3H4,ACTB,GABARAP,PDAP1,TTF2,BLOC1S5,HDGFL2,SRSF2,SPTLC2,RPS10,EIF3A,NUP155,MIA3,CARTPT,GABPB1,STRADA,ATP6V1F,ATP7A,COIL,SUGP1,VPS4B,RETREG3,ESRP1,HTATSF1,MAN1A1,PAM,PTMA,GUSB,GPX7,XRCC1,IGF2R,LZTR1,TSN,LCN2,TNF…
0.000168640233974576	THRAP3,MEPCE,UBL5,SFPQ,SRSF4,SNW1,SRSF7,PABPC4	PNN,SMC1A,THRAP3,SNRNP70,YBX1,RBM6,SRRT,SERBP1,ZC3H13,SARNP,GATAD2B,EDF1,NOLC1,RPL18A,INTS12,MEPCE,ATP5D,EIF3A,PRRC2C,DDA1,REPIN1,SRFBP1,SLTM,PNISR,PTMA,UBL5,ADRM1,ARCN1,ZC3H18,SAFB,HIST2H2AB,ZC3H11A,SFPQ,RPS29,NDUFA7,IGLL1,RPA3,CLTB,USP14,PELO,ADO,COL4A1,FTSJ1,HIST1H3D,GPLD1,TINAGL1,POLR2A,NSRP1,RPS18,NDE1,SLC9A1,CARTPT,TJP2,AGFG2,EIF2S3,ANKRD49,OARD1,RPL32,HTATSF1,TFAM,IK,NCBP3,G3BP1,SRSF4,TMEM…
2.55067100013704e-05	SART1,SF3B1,USP39,PRPF40A,THRAP3,SFPQ,PRPF6,SF3A2,SNRNP200	SF3B2,SART1,HTATSF1,SERPINF2,SF3B1,SENP8,ZC3H15,SPATS2,SCAF11,RPL10A,ADH1B,USP39,ENPP2,PRPF40A,THRAP3,PNN,RNF40,IGLL1,TPT1,SFPQ,COPG1,CDKN2C,SRP68,PTEN,LRG1,SMARCD2,GPT,PRPF6,CES1,INTS13,MYBBP1A,USP9X,A1BG,UTP3,SF3A2,VPS36,EIF4G1,SNRNP200,ALAD,GRPEL1,NELFB,FOXK1,CWC22,EIF5B,SDE2,RALGAPB,NUF2,MPHOSPH10,BZW2,DDX3X,YBX1,RSRC1,CFD,CNP,CD109,DAGLB,AHNAK,NDUFA10,TRIP12,MLH1,GNL2,EWSR1,STOML2,DOPEY2,APO…
0.00487997377641746	PRPF6,SART1,USP39,SF3B1,DDX23,NCSTN	SF3B2,PRPF6,GPLD1,SART1,USP39,EIF3C,IGLL1,RSRC1,SF3B1,PLCD1,CRISP3,YBX1,KIAA0907,ADH1B,EWSR1,RANBP2,TF,SRP68,HSPA12A,DDX23,MINK1,COQ9,TM9SF2,RFC3,AIMP1,LMAN2L,CCNK,PRKDC,MID1,INTS6,ENPP2,CTSG,ORM1,FETUB,ZNF638,ZMYM2,EIF4G1,AHSG,NR2C2,ELL,NUP93,AIFM2,DHX36,MARC1,AUH,CAVIN3,ARPP19,FGGY,MICALL2,EIF5B,F12,CELF1,ARHGAP45,GPATCH4,PBLD,ACAD8,DEPDC5,RASSF2,ALDH1L1,CUL4A,CSAD,TNFAIP8L3,LIMS1,CD163,RPS10,T…
0.00317701773122857	SBNO1,IVNS1ABP,EPS15L1	BSG,ANKHD1,ESRP2,TCF20,MGMT,TMED1,GPCPD1,SH3BP5L,TRIM28,C4orf33,SBNO1,HPGDS,DAB2IP,UBR3,UBE2F,PAPD5,EPS8L1,IVNS1ABP,LOXL2,PANK4,ITGB4,RASAL2,MRPS2,NT5DC3,CAMSAP2,IKBIP,ELP2,NAA25,RPL17,MAP4K4,GJA1,GDI1,MRNIP,LPIN2,RANBP10,PNO1,DCPS,NKRF,NEK9,LGALS1,MIA3,TIMM10,PRODH,MCCC2,SIPA1,SRPRB,TMEM126A,NOL11,ATL2,UBN1,SMG7,RB1,SNCA,GSR,GCN1,NUDT2,MMP19,SAMSN1,SORL1,ZMPSTE24,PMM2,AP1G1,EIF4E,GULP1,DFFB,CCZ1…
0.0027516520270888	PNN,SERBP1,SCAF1	ZFP91,PNN,GATAD2B,SMC1A,ARID1A,EXOSC1,MARK2,RBM14,SRRT,BOD1L1,INTS12,RSRC2,TCOF1,RPS26,YLPM1,RPS18,FNBP4,MARCKS,SUMO3,SERBP1,CCDC9,GID8,THRAP3,SFPQ,PRRC2C,TMEM263,PCNP,ISY1,CHMP1A,NUDT18,NDUFA7,MED8,CLN5,ALDH1L1,RBMX,SCAF11,SAP30,C19orf53,KIAA0907,RAB1A,CHM,RARS2,CNPY4,RTFDC1,MGA,GGT5,SCAF1,YBX1,DSCR3,C4B,ECI1,PRPS1,HIST2H2AB,CSF1R,ZBTB8OS,RBBP6,RRP9,WDR46,MRTO4,LSM7,SULT1A3,GLRX,SWAP70,KPNB1,RBM…
0.000163259112411074	SNRNP70,PNN,SERBP1,THOC7	ATXN2L,SNRNP70,PNN,PRRC2C,GATAD2A,SRRT,YBX1,SAFB,PRRC2A,SARNP,SMC1A,PRPF6,ZNF787,SDE2,GATAD2B,RBBP6,PTMA,MARK2,ZC3H18,PPIE,ABHD14B,CAPZA2,CCDC86,TXLNA,SLTM,ACIN1,THRAP3,ELOA,SERBP1,LRG1,MYO1C,RBP4,ORM2,PLIN1,AGTPBP1,LYVE1,GPD1,HIST1H2BB,TOMM70,SNAP23,SMAP2,RBM25,RANBP1,GCC1,RBM12B,LAMB2,WDR83,ITGA7,VWF,GRIPAP1,POLR1B,ABAT,FABP4,RPL27A,SMARCA4,GPT,NCKAP1,ARF4,AMBP,SERPINA1,EIF2S1,NHP2,REXO4,DYNLRB…
0.0027516520270888	PNN,SNRNP70,SCAF1	PNN,ATXN2L,SRFBP1,SETD2,PRPF6,EIF3C,SARNP,MARK2,MAP7D1,C4B,LRG1,INTS12,ARID1A,FAM192A,MRPS18A,CCDC86,FUT11,DIS3L2,TMEM263,TBCA,SNRNP70,COL6A3,EAF1,LUC7L3,KIAA0907,BRCC3,XAB2,EXOC3,RRAGC,YBX1,ZFR,IGLL1,ARID4A,SHTN1,SAFB,VPS26A,CSPG4,ALDH1L1,LUC7L2,MYBBP1A,SPARCL1,ALAD,ERCC2,NDRG2,GPATCH4,SRP68,HNRNPM,RBM12B,DARS,TSEN54,SCAF1,COX7A2,SNW1,ATP5H,DYNLT3,GABPB1,PDZK1,MINK1,OTUD4,ASCC3,RNF114,USP39,HLA-…
0.0027516520270888	SERBP1,PNN,SNRNP70	RABGAP1L,RPS26,PRRC2C,ACIN1,PYM1,GATAD2A,MARCKS,MAEA,ZFP91,ZC3H13,CLTB,BLOC1S5,ZC3H4,SARNP,THRAP3,NFX1,ELF2,MFAP1,RAVER1,COX17,MYL6,VAMP8,RTCA,YBX1,SERBP1,TBCA,NDUFS6,EIF4B,RPS18,RPL18A,PTBP1,YBX3,RERE,GATAD2B,RSRC2,ZC3H14,ZNF687,PCNP,VCP,TARBP2,ARGLU1,RPS29,MRPS18A,EIF2S3,TRAPPC11,RPL31,CDKN2AIP,UBE2G1,RPL32,WTAP,RPS11,NDUFA7,RACK1,RPL13,SCAF8,ISY1,PNN,RBM6,ARID1A,PPIE,YLPM1,SUMO3,DNAJC8,LRPAP1,…
0.00727692874448481	SCAF11,SRSF3,SNRNP70	GATAD2B,PNN,ARID1A,ATXN2L,RPS26,ZFP91,SRRT,SARNP,SCAF11,PRRC2C,SRSF3,SNRNP70,MRPS18A,MAEA,MARCKS,MARK2,ZNF24,SLTM,TBCA,CLTB,PCNP,RPS29,HDDC3,RPS11,ZC3H14,RBM6,ELOA,PTBP1,COX17,ZNF638,RBM14,YBX1,DENND4C,TCOF1,FUBP3,AMBP,MRPS16,TACC1,LARP4,DROSHA,VPS11,VWA8,WDFY3,CPS1,WDR55,CASC3,TBC1D24,ZNF516,UQCRH,ING3,UBE2V2,JCAD,ATPAF1,PPP1CB,CRTAC1,HNRNPDL,NF2,DSCR3,GRPEL2,EPM2AIP1,WAC,ZSCAN18,PGAM2,RCSD1,SUM…
0.00541509731314145	C10orf76,DYNLL2	CEP128,LIAS,C10orf76,RPS23,TRADD,FIS1,CASP9,MCCC2,DDX6,GSS,VAT1,PGM2,TXNDC5,SARS2,TBL2,STX5,NEB,GDAP2,GNL3,C17orf49,PIP4K2B,SNF8,CWC27,FGGY,ZC3H7A,BIRC2,DYNLL2,HID1,ACTR1B,ECE1,UBE2G2,ASCC3,RAB10,RPP38,TBC1D2,WARS2,APIP,ZDHHC13,TWF1,ELOF1,KIF1BP,FBXO11,SCRN3,MYBBP1A,COX6C,ZNF280C,SPINT1,PNPLA4,SH3BGRL,F11R,NISCH,HOMER2,PKNOX1,PEBP1,KATNAL1,IFIT2,SCAF1,MGMT,TIMM10B,DSC2,INTS10,CNP,DOCK9,ORC2,TPP1,…
0.000625238421659997	PRPF6,SF3B1,SART1,SFPQ,RBM10,THRAP3,SRRM2,PLRG1,CYLD	SRP68,EIF3C,ORM1,PRPF6,TPR,IGFALS,LSM3,SF3B2,INO80C,SF3B1,SNRNP70,SERPINA7,SART1,APOH,ELL,IK,TMED2,SON,SFPQ,GPLD1,ZNF638,C3,PGLYRP2,IGLL1,LUC7L3,WDR46,RBM10,C8G,THRAP3,AMBP,CP,FRZB,C4B,MPHOSPH10,ATXN2,HTATSF1,SOD3,APOC3,CCDC9,TF,GPX3,NDUFA13,EIF3G,CSTF2,RECQL5,SERBP1,SLIT3,SRRM2,ZNF207,SMARCE1,ZCRB1,EHD3,PLRG1,CLCC1,PHF3,PNN,ZFR,RBM15,GPR107,BTD,GOLGA2,NCOA5,THOC3,CLSTN2,NCSTN,CACYBP,CYLD,HRG,ALD…
0.000863078702349413	ISY1,ZC3H18,PRPF6,PHF5A,SRRT,ACIN1,SRSF7,LARP7	ZNF787,ISY1,BOD1L1,COA7,NDUFA7,PRRC2C,RPS20,TPRKB,FEZ2,ACTA1,MRPS15,MARK2,SP3,RBM6,RPS26,SMG9,TMEM263,UBAP1,THRAP3,HGS,PPCDC,RTFDC1,ZC3H18,CNBP,RAB2A,RPS18,GGT5,SARNP,C19orf47,SERBP1,PRPF6,RSBN1,C5orf24,RBM26,PHF5A,EIF2S3,PTMA,TBCA,WRAP53,PPP1R12C,RSRC2,SRRT,SLAIN2,ZC3H4,ZC3H14,TUBGCP3,ACIN1,VPS39,EIF3C,MTDH,INTS6,SAR1A,SETD2,DDA1,UQCRQ,CCDC86,RBM14,GPATCH8,CLTB,SRFBP1,UBAP2,GLRX,TFCP2,RPE,TRAPPC…
0.000220774344493224	RBMX,CHD4,TRA2B,PRPF40A,SON,RBM15,SNW1,RBM14,CDC5L,UBAP2L	GGA3,TTC9C,SRSF7,EHD3,PPP1R14A,DCTN3,PIK3R1,MED18,RBMX,CHD4,KANSL2,RTF1,CCDC12,POLR2A,RBM22,CELF1,NSUN4,ADNP,OARD1,VIM,PPA2,PPIL1,TRA2B,SIKE1,MRPL11,COL18A1,GC,LSM6,HYI,CNOT9,DAPK3,AHSG,GSTM4,ACTA1,SORBS1,ORM1,ZNF638,MAEA,PRPF40A,TPPP,SRP14,MAP3K6,YIPF4,SPTBN1,ADD3,RPL32,GATAD2A,SON,RBM15,MRC1,ZFAND6,ARL2,GTF2F1,SGTA,PGLYRP2,CHTOP,AP4S1,GRB2,SNTB1,RPS11,HRG,CSTF2T,ZNF598,SHMT2,PRPF18,PHLDA3,NIPBL…
4.43051299828607e-05	SF3B6,TOP1,SF3B1,SON,SF3B2,SMNDC1,MYO1C,EIF4A3,PRPF4,CDC5L,CUL1	EIF4G1,SF3B6,STC2,TOP1,TPX2,EEF1D,STRAP,CEBPZ,DDX3X,SERPINB6,SF3B1,KDM4A,SEPT2,CIAPIN1,RRP1B,PLCD1,MDP1,SMC4,UBE2T,GPX3,SMC2,PDZK1,CFD,NAA15,SON,SCRN2,SF3B2,DDX24,WDR74,DNPEP,NOSTRIN,BAZ1A,LSG1,NASP,EIF3C,SPG21,MPHOSPH10,SMIM12,WDR12,NAA10,RARRES2,LARP4B,DNMT1,STAT5B,PTGR2,IL6ST,NSMCE2,EML4,GSPT1,WDR54,GSTT1,PHYKPL,SMNDC1,SRP68,MYO1C,RAPGEF1,TTN,CNDP1,ELL,SHPK,FBLN5,MAN2C1,TFF3,PZP,ESRP1,GRK6,PIP…
0.000584858073034801	ZCRB1,SMIM20,CHD4,PCBP2,SNW1,RBM10,SRRM2,LSM3	TXLNG,PRRC2A,PRRC2B,RPS26,NMRK1,NFKBIB,NDUFA13,EIF3C,EDF1,SRSF7,COX7A2,CNOT10,UBP1,TAX1BP1,SNRNP70,TMEM106B,RBM25,EIF3A,EMSY,AP5M1,YIPF5,GCC1,DPYSL2,TSC22D2,CDK7,UBR3,SRRT,ZCRB1,TPR,SART1,BLOC1S5,SAMD1,SRSF6,MICALL2,SMIM20,GABPB1,CHD4,MED22,PCBP2,GGT5,SNW1,CCDC9,RPL22,ATP6V1B2,HIST1H3D,CLASP1,PHB,ZC3H14,PHC3,ZC3HAV1,NIPBL,SOGA1,RTF1,NFATC2IP,ATXN2L,ZC3H15,SERPINA7,ZNF24,CIR1,SON,RBM10,NCBP3,SEPHS…
0.00279690384666866	RNF113A,PHF5A,LARP7,THRAP3,YBX1,SNRPD1,SRRM1	PNN,RBM14,GATAD2B,SRSF5,CDKN2AIP,RPS29,LSM6,SUMO3,FCER1G,RPS15A,SMC1A,ZNF24,CD59,RPS11,CHCHD3,EIF2S3,ZC3HAV1,KDM4A,SRRT,ZNF638,ZFAND6,CCDC93,GATAD2A,LSM5,SP3,PPP1R11,HGS,DYNLRB1,RNF113A,RPL18A,FBXW8,ZC3H14,ARL6IP1,RPL32,WTAP,MARK2,HDDC3,MVB12A,SRSF6,CREB1,ZNF668,INTS12,RSRC2,PHF5A,KIAA0907,C1QC,RXRB,GGT5,GMPS,ACSS3,EIF3A,LARP7,LUC7L3,ALDH3A2,THRAP3,NOM1,TCOF1,NUP210,SAFB2,HEBP1,YBX1,THOC3,CRYL1,P…
0.00279690384666866	LSM3,YBX1,LARP7,CHD4,RBM10,ZNF830,ZC3H8	SRRT,RBBP6,PNN,CNBP,PPIL1,BCLAF1,ZNF638,GATAD2A,ZC3HAV1,EIF3C,ZFAND6,CBLL1,ATXN2L,LSM3,RREB1,SNRNP70,RBM6,PRPF6,RPL17,HMGB1,YBX1,EIF5B,MRPS15,CDC73,ELL,PRRC2A,SMC3,ZFAND3,SP1,RBM26,RBM14,MTA2,RSRC2,BRD4,LARP7,IK,DARS,TBC1D4,POLR2J,NID1,ANAPC2,ALDH1L1,SART1,RANBP2,ZNF579,ANTXR1,CPSF1,CHD4,CCDC93,ZMYM2,TRMT1L,CWC22,SRP68,EIF2S1,RPL27A,YARS,KIF2A,LYSMD2,JUND,AP2S1,DPM3,YTHDF3,ARMC6,RBM10,ARID4A,SH3B…
1.74905041285535e-05	CHD4,SF3B1,SNW1,SF3B3,RBMX,THRAP3,TPM1,RBM10,SF3A2,MEPCE	MED8,CHD4,PLRG1,MPHOSPH10,RBBP6,CSTF2,LENG8,AKAP13,IRF2,SF3B1,PRPF6,AOX1,SOD3,YY1,PNISR,DNMT1,DMD,FLNA,ZNF638,PPP1R14A,CPSF1,MARC2,RRP9,RSU1,TMOD1,CNOT3,LMOD1,ZFR,SYNPO,SNW1,PPP1R12B,VASN,SF3B3,RBMX,URI1,TWISTNB,SMIM12,BCLAF1,SMARCE1,TPPP,NCL,PPP1R13B,ALB,NTN4,NT5E,AIFM2,MYH11,GPATCH8,COA7,MARCKSL1,GPALPP1,SIN3A,GTF3C1,SAFB2,KRI1,VWF,POLR1E,NUF2,THRAP3,SART1,CNDP1,SLTM,DKC1,ACTA1,CRISP3,RBM26,HBG…
0.00355353042393936	PHF5A,YBX1,PRPF6,EIF4G1,DCTN1,CUL3,CUL1,HGS	PNN,RBM14,SARNP,GATAD2B,RSRC2,ZFP91,PHF5A,RPS18,GATAD2A,MARK2,YBX1,LBH,PRRC2C,ATXN2L,TCOF1,SUMO3,POLDIP3,CDKN2AIP,RPS11,CBLL1,RPL32,PTBP1,NAA10,PGM5,HADHB,EIF3C,CIAPIN1,PRPF6,TPR,RRP1,SYNE1,SUMO1,RIOX2,WTAP,RPS29,MTX3,RRP15,STIP1,EIF4G1,MED22,FBL,ARVCF,NASP,DCTN1,SERPINA7,VBP1,LSM7,RTFDC1,GPX3,CHCHD3,VPS29,TMEM189-UBE2V1,HEXB,CSN2,PBXIP1,FAM120A,NAPG,OPLAH,NUDT18,EIF4E,IFT80,HDLBP,FKBP15,BRMS1L,V…
0.00134740510481143	YLPM1,THRAP3,SLTM,PRRC2A,SRSF3,SERBP1,SFPQ,PCBP1,LMO7	ACTB,SURF6,TRIR,YLPM1,PDS5A,SCAF8,THRAP3,ZFP91,GATAD2B,SRRT,ACTA1,MYL12A,GATAD2A,SAFB,SLTM,RBBP6,SDE2,ARID1A,HGS,PRRC2A,WDR33,RBMX,PNN,RBM33,ZNF24,SRSF3,SUMO3,GPATCH8,ELL,SERBP1,CHMP2A,ATP5B,TAB3,RTCA,UBN1,RPS20,ZC3H18,TBPL1,SMC1A,TUBA1C,MFAP1,SETX,SCAF11,SFPQ,GID8,WTAP,RCOR1,MRPS10,ZNF687,RPS19,RALY,MAX,PNISR,QTRT2,NDUFA13,SNX17,C1orf174,ISY1,ZNF787,PCBP1,PXK,DPM3,RPS27A,H6PD,RPN1,GOLGA2,VPS11,G…
0.00513647966662256	PRRC2C,SERBP1,THRAP3,U2AF2,LARP7,SLTM,SRSF5,PHF5A	MARCKS,ZFP91,MARK2,PNN,PRRC2C,SMC1A,GATAD2B,PCNP,SERBP1,SARNP,ARID1A,SUMO3,RPS11,ATXN2L,THRAP3,TCOF1,TBCA,RBM14,RPL35A,RBM26,PYM1,LUZP1,RPL29,RPS29,ZFAND3,EIF1B,DSCR3,SDE2,COA6,CHCHD3,TAOK1,ISY1,C1QC,YBX1,DCTN3,MED8,USP6NL,CLTA,KANSL2,ZRSR2,PRTFDC1,PITPNB,FAM192A,ASCC2,SCUBE2,C7orf43,U2AF2,GCC1,LATS1,ARPC1A,SCO1,LARP7,GGT5,GGACT,LYRM4,RFC1,CTSZ,NOLC1,PSMD9,ABCF1,POLR3C,HMG20A,ERC1,MAP7D1,HDAC7,CC…
0.00031515002630302	PTBP1,PRRC2C,ZC3HAV1,HNRNPA1,HNRNPA3,SNW1,SRSF4,SRSF7,SFPQ,EGFR	RBM14,GATAD2A,PPM1G,MRPS18A,AP5M1,RNF113A,EIF3A,GCHFR,RPS29,POTEF,S100A10,INTS12,SLC16A3,RPL32,SLU7,LBH,ARL6IP1,CREB1,PTBP1,ASNA1,SUMO1,WTAP,UBE2B,ELOA,PPIL1,SNRNP70,CDKN2AIP,THOP1,ATP6V1B2,PRPF6,MED8,ZC2HC1A,ACTA1,ZNF787,UBL5,WDR45,ACTB,RPL35A,RNF40,HGS,SRRT,MARK2,C17orf49,UBTF,HMGB2,GNB2,NAP1L1,HSBP1,ALDH1B1,HNRNPDL,RBMX,RFC1,PRRC2C,SUFU,VPS39,ZC3HAV1,ACTBL2,ZC3H14,LSM5,SNRNP27,HNRNPA1,GPX1,FCH…
0.00134740510481143	SP3,PCBP1,RAD21,VCAM1,YLPM1,LARP7,UNK,NONO,CHD4	S100A7,KANSL2,RBM14,ZNF24,SP3,TAX1BP1,MED23,PCBP1,SAP18,TCOF1,THOC7,NUMB,ARF1,RPL22,XRCC6,RAI1,RAD21,ATP5J,NARFL,ZC3H18,VCAM1,LENG9,CTDP1,MBOAT7,SAP130,HSPA8,SCAF8,BPTF,EIF3C,FBXO28,PSD4,SH3BGRL2,PXN,AMBP,ACO2,SIPA1,SNRPE,PPP1R12C,FTSJ1,NDUFS6,MOB1A,PCNT,YBX1,RBM25,GPALPP1,ACAN,MYL9,ARL14EP,C12orf57,FAM76B,ABHD14B,NUDT15,YLPM1,REEP5,TXN2,PDZD11,LARP7,EIF5A,ZNF687,ATXN2L,FBXW8,NUP43,RPS20,MPZL1,TB…
0.00409963059488909	SH3D19,CDH1	DBNL,TRIP10,EPB41L2,FBN1,SH3D19,LRP1,SEPT7,AKAP13,DCTN3,PTCD3,MED24,ARPIN,C19orf66,CD248,RHOA,EFHD2,THYN1,MITF,MFAP2,H6PD,PKN1,GEMIN4,FNBP1,CILP,BPIFB1,CAVIN3,LAMTOR4,MAP4,VIM,DNAJA3,CSNK1A1,TNS3,ABRAXAS2,NOTCH2,MAP2K4,RIF1,C1QBP,ADIRF,CCDC88A,YBX3,DNM1,LOXL1,TPM1,AIF1,JCAD,ZC3H12A,FHL3,SNX29,PITPNA,SRPX,CDH1,DSCC1,TSC22D2,INPP5D,SMG1,CCDC93,GM2A,TRIM5,PITHD1,ZC3H7B,FANCI,FN3KRP,NPNT,TRAPPC6B,HIF…
0.000863078702349413	SIN3A,CHD4,HDAC4,HCFC1,SAP30,SEPT11,PDLIM5,PTMA	PRPF6,SIN3A,APOC3,CPSF4,MED8,RANBP2,CCAR1,U2SURP,CHD4,SRP72,RBM10,NAT10,GPX3,SF3B1,EDC3,HNRNPM,PDS5A,RPS5,FABP4,PTGDS,SNRNP70,SMIM12,CD99L2,MYLK,ZFAND6,SMTN,CHERP,ATXN2,SUPT5H,INTS5,HDAC4,HCFC1,HSPB11,NFATC3,AIMP2,MPHOSPH8,ZFHX3,SAP30,SOD3,CASC3,PEAK1,FLOT2,NASP,SIKE1,SNRNP27,ZYX,MED17,ADNP,SLC16A3,METTL18,MOB1A,CNBP,PLXNB1,ANXA1,CRTC3,FERMT2,SBDS,ZMYM4,RBM25,MFGE8,SNUPN,RBM7,LENG8,SEPT11,ARHGAP4…
7.90437282513536e-06	EPB42,SLC4A1,CA2,ANK1	NDUFA7,SPTB,HGS,SAR1A,DDA1,ISY1,EPB42,RBCK1,UBE2B,AHSP,CREB1,BUD13,CDC73,HAUS3,SMARCB1,ZNF787,TFCP2,ZFP91,RACK1,CA1,CCDC12,SLC4A1,FCER1G,SPTA1,SLC2A1,NDUFC2,MAEA,TANK,HOOK2,GNB2,CA2,CCDC186,GCC1,MZT1,CSN2,SRSF3,PTBP1,TOR1AIP2,HBS1L,C14orf166,HBD,SRP19,SEPHS1,HBB,ZDHHC5,C1orf50,CEP57,GATAD2B,VAMP8,CUL4A,EHMT1,SCAF8,GBF1,SEC24A,C5orf24,UBAC1,HMOX1,TPRKB,CD180,SNCA,PROM1,EPB41,FRZB,CCS,NCBP3,AVEN,HB…
0.00854121907456476	EPB42,HBA1	ASNA1,ERC1,RCHY1,HBG1,BASP1,MRPL57,THOC7,AHSP,EPB42,SMG9,NDUFA1,RAVER1,CLCC1,ZNF460,HMOX1,HERC5,DDA1,LYSMD1,CCDC186,ARHGAP18,TAF9,KHDRBS3,MPP1,NDUFS7,ZNF787,MARK2,EEF1AKMT2,UVRAG,SAR1A,SLK,ELOA,UBE2B,NXT1,INTS9,PNKD,CMIP,LETM1,COA3,SPTA1,RPS11,C19orf53,ME3,PRKRA,APOE,ZDHHC5,DDX59,SFXN5,NCDN,TSR2,PGAM1,ZC3H12A,ISG20L2,CA1,ADD2,NDUFA7,HBS1L,TRIP10,ROMO1,CD44,MOSPD2,SNCA,ARCN1,HBA1,KCTD10,PREPL,FCER…
0.00689728285801005	SLC4A2,ATL3	CUL1,SLC4A2,ESYT2,INTS5,ACSS3,PXK,SERPINI1,STRADA,PML,INTS1,RBPMS,GPT,SNRPD2,GBA,COLGALT1,CD9,ATL2,EIF4G1,PDIA4,INPP4A,CHMP1A,TTPAL,RBP1,YIPF3,CTIF,PLCB3,UBR4,DPT,SYF2,SUMO1,CEBPB,TMX1,CASZ1,TBPL1,KDSR,ARAP1,NUP93,SSC5D,MAN1A1,RAB10,CAD,SMC3,PAPSS1,C4B,HBZ,PES1,STXBP4,ITPK1,PGM5,LAMTOR1,SIN3A,ERAP2,CHAD,MYO5B,FAM122A,ATG5,ACADSB,LAD1,ATL3,MAPK9,RAB25,CUL4B,XPA,NUBP1,ARRB1,HLA-A,RPN1,COMMD5,PIK3CB…
0.00126764849782437	CHD4,SIN3A,SMARCAD1,CUL4B,DMAP1,USP7,SMARCA5	RPS18,PLAT,MRPS15,SEPT2,EXOSC6,PRPF6,ORM1,MARCKSL1,CCDC12,SAP30,STIP1,HPGDS,AHNAK,PLTP,C19orf47,NUP93,SRRM2,ALDH1L1,SH3BGRL2,MRPS2,U2SURP,EXOSC10,CAPNS1,RBMX,RBM25,BPIFB1,CHD4,SIN3A,TCEA1,SMARCAD1,CAPN2,POFUT1,ZMYND11,PHYHD1,ACO1,RFC1,RPL32,KIAA0907,NOP16,USP39,ITPR2,XAB2,CUL4B,NCBP3,COX7A2L,LYST,PHF23,COA7,ZNF668,BAG1,CES2,F2,CHGB,RPL12,TRIM36,FGGY,VCPIP1,ZC3H7A,DMAP1,MRTO4,NAA15,MLLT1,RARRES2,H…
0.00133341063119054	SMC3,RIOK1,MEPCE,SIRT6,PDS5A,CHD3,CUL7	FAM177A1,TOR1A,SMC3,OPHN1,MAD1L1,GATC,NXT1,BRD2,SAR1B,C1orf50,PCYT1A,CIR1,NOA1,ZC3H15,TOR1AIP1,MVK,RAB27B,RIOK1,PIH1D1,UNC119,STK24,NDUFS2,NHP2,ZC3HAV1,MED10,KIAA1143,NDUFA13,TTC30A,POLR3K,MEPCE,ZMYND11,RPLP0,DYNLRB1,PELO,ATP6AP2,SUFU,GRN,TRNAU1AP,GGA2,BRMS1,SIRT6,FAM111A,IFT81,UBE2N,PAPD5,LSP1,KANSL2,PDS5A,P3H4,MED9,LYPLA2,CDC23,HACD3,IFT80,VPS13B,ZC3H12A,MECR,POLR2I,POLR1E,SEH1L,CDH13,TBCA,AMPD…
0.0068687717844557	TRIM14,HSPA8,ZNF598,CDK9	CYR61,C19orf25,MZT2B,ZNF185,LPIN1,GHDC,PPL,ARF1,GTF2B,VCAM1,AP2A1,RXRA,PAFAH1B1,PRODH,OTULIN,MOB1A,NUDT4,TRIM14,SH3PXD2A,ZC3H18,MKNK1,GALK1,ATP6AP2,CBS,CCT3,SLC44A2,TRUB1,PPP1R12C,AP1B1,CREBBP,TPPP3,LGALS7,ABHD14B,NDUFS6,PCNP,LIN7A,MYL9,USP16,NUMB,TAX1BP1,DCAF10,GTF3C6,RPL28,ACTA1,MTMR9,PCNT,TMEM109,DCAF11,NFATC2IP,POLR1A,COPE,ZCRB1,MYL6,UNK,FAM107B,SNRPA,TARBP2,RBM14,HSPA8,PRPF6,UBE2I,USP18,FBXW…
0.000922630374864211	SMC4,NCAPH,SMC2,NCAPG,PRPF8	SMC4,SERPINC1,NASP,AZGP1,U2SURP,SLBP,ENPP2,EIF4G1,RFC3,RARRES2,ORM2,SON,NAT10,CSNK2A1,NCAPH,SMC2,KIF4A,SYMPK,INTS1,PLCD1,BTD,RBP4,SERPING1,RBM10,PRELP,AKAP8,TNPO3,LRG1,RFC5,NCAPG,CPSF1,SERPINA7,ORM1,KIFC1,TOLLIP,F12,SERPINF2,SLC4A1AP,APOH,LSG1,PRPF6,SELENBP1,KNG1,CSNK1A1,SELENOP,YBX1,BZW2,DYNLT3,MYO1C,SF3B5,HPX,HYI,USP39,MCM3,HMCES,PTMA,SF3B1,MDC1,FETUB,PTGDS,RBBP4,DMTN,SCYL2,OTUD6B,YEATS4,ATP2A3…
0.00039802857845197	SMN1,SNRPA1,GEMIN6,GEMIN4,SRP54,DDX20,SIN3A,NONO,DOCK7	RANBP2,CHERP,TRIM25,SMN1,CPSF4,CDH5,CHAF1B,POLR2H,SLC4A1AP,UBE2T,VWF,SMNDC1,NAT10,SNRPA1,GEMIN6,GEMIN4,SRSF9,KIF4A,PFDN2,ELOC,EXOSC4,DHX30,LAMA5,NASP,SRP54,PSMB8,DDX20,RFC4,GC,CSTF3,TTN,ARAF,POLR2F,PRPF6,RPRD1A,STEAP4,U2SURP,G3BP1,PARP10,WDFY3,IPO9,CA3,EIF2AK2,IFIH1,SIN3A,RASIP1,GINS4,RFC2,GNB1L,RALB,SNTA1,PAFAH1B1,RRP7A,NONO,NAA15,PYCR3,EDC3,EIF2B2,TNPO3,MRPL18,EIF3I,MORF4L1,HIST1H2BB,ZNF638,CET…
0.00722985845714205	SMN1,DDX20,KDM1A,GEMIN6,GEMIN4,SULT1A3,SNW1	SMN1,SMNDC1,NAA15,CHTF18,RBM10,CAPRIN1,NAA10,RANBP2,LAMA5,CRISP3,RALB,DDX20,AKAP8,DHX30,NAA50,CELF1,MORF4L1,U2SURP,HIST1H2BB,SLC4A1AP,KDM1A,UBE2T,GEMIN6,GEMIN4,FAM122A,GSPT2,SLIT3,ZBTB8OS,C8G,CAMP,ATAD2,CHAF1B,SULT1A3,ELOC,BCHE,RPRD1A,TRIM25,NUP153,ZMYM2,TAF5,C3orf38,U2AF1,ZNF598,GPX3,SNW1,PPP2CA,GPLD1,IL4I1,LARP4,PPAT,ZMYM3,PSMD3,BZW1,POLR2H,STOML2,EXOSC4,NCOA1,VGLL4,ADNP,PRPF40A,CPSF1,SUCLA2,BP…
0.000740068275035674	EIF5B,SND1,DDX3X,POLR2A,RPS2,RPS3A,SRP68	EIF4G1,EEF1D,CDC73,SON,EIF5B,ADH5,NAA10,SND1,SCRN2,SART1,RANBP2,DDX3X,SLC4A1AP,SF3B1,CSAD,AKAP13,FBLN5,TSPYL5,IL6ST,SERPINF2,POLR2A,MFN1,YARS,CNN1,MAGED1,CPSF4,FABP3,IDNK,AKR7A3,RPS2,MARK2,TOP1,AGT,GAMT,PBLD,YBX1,POLR2F,CAMK2G,TMOD1,DSTN,SYNPO2,ADH1B,NAA15,TNS2,RPL12,EMC4,PGM5,RBM10,HSPA2,GSTM4,XPA,C1RL,ZNF638,PGLYRP2,ABCF1,IFIH1,ERAL1,ELMOD2,TPM1,FAM98B,U2SURP,PIR,VPS16,TANGO2,PAN3,GALNS,LARP4B,…
0.00265037425542424	PNN,SRRT,THRAP3,ISY1,YTHDC1	ZFP91,PNN,GATAD2B,RPS26,SMC1A,SRRT,THRAP3,PRRC2C,BOD1L1,RBM14,YLPM1,MAEA,ISY1,MARK2,ZNF787,SRSF3,TCOF1,SERBP1,CWC22,ATXN2L,SLTM,GGA3,RPS29,MARCKS,TMEM263,PCNP,ARID1A,SDE2,RPS5,SUMO1,NDUFA7,SRSF7,YTHDC1,RPS19,LALBA,CHMP1A,MBD1,RPL35A,WDR36,C19orf53,CSN2,HDDC3,GPATCH4,IDNK,ZRSR2,LANCL2,LENG8,XAB2,PROM1,COMMD5,MSRB3,GIT2,APCS,COPS7A,ARGLU1,SLC16A3,NOC4L,PTPN11,ZFPL1,KLHL36,MAP7D1,PPIL1,NOLC1,PHF6,C9…
0.000373109229967647	PNN,CCDC9,MFAP1,YTHDC1,SRRT,ISY1	ZNF787,EIF3A,ZFP91,SUMO3,SMC1A,PNN,UBAP1,CCDC9,SLTM,MARCKS,MAZ,ACTB,TCOF1,PRRC2C,UBL5,SMAD5,PCBP1,MAEA,ARGLU1,RPS19,RABGAP1L,NFX1,PSMA5,YLPM1,PPP1R11,SETD2,RACK1,TPRKB,DDA1,VEZF1,ZBTB14,BLOC1S5,HSD17B10,USF2,MFAP1,CLTB,CUTC,YTHDC1,PPIL1,PPHLN1,SRRT,SRSF7,MECR,NID1,SZRD1,ELOC,REPIN1,AAMDC,SNX15,TES,HLA-DRB1,AIMP2,COMMD10,MED8,RBMX,GPT,IST1,VAMP3,SAFB,PPP1R14A,CHMP1A,MSN,RBM14,EIF4B,FAS,ZC3H13,C1QA…
4.41150921226792e-05	THRAP3,ISY1,PNN,ZC3H14,YTHDC1,GPATCH8,EZH2	THRAP3,MARK3,SETD2,ZFP91,MARCKS,ISY1,TCOF1,GATAD2B,SUMO3,ZC3H13,MAZ,ZNF24,MRPS18A,BOD1L1,PNN,ZC3H14,WDR33,ATXN2L,SLTM,HSD17B10,HGS,PPP1R12C,TMEM263,EIF3A,SFPQ,NSRP1,MAEA,ATP5B,MVB12A,NDUFA7,SP3,HDDC3,ZC3H4,PRRC2A,SP1,PGLS,CWC22,COX17,ZNF787,SMAD5,RPS19,ENSA,YTHDC1,C1orf174,NOLC1,ADH1B,TRAFD1,SRSF2,ARGLU1,ECHS1,RPS5,ACTR8,LYPLAL1,ZCCHC3,EDF1,MGME1,EHD3,PCCA,CMC1,HIST2H2AB,SERBP1,CSTF2,GNB1L,ABRAXA…
0.0010696792938657	PRRC2C,ZC3H14,SLTM,SNRNP70,EZH2,RBMX,ZRANB2,SUZ12,MRPS14	PRRC2C,SRRT,YLPM1,ZFP91,MAEA,ZC3H14,SMC1A,PNN,RPS26,YBX1,SLTM,TCOF1,ARID1A,TPR,SERBP1,SFPQ,CBLL1,NCBP3,CTSG,COX17,SNRNP70,DDRGK1,F2,ZC3H18,CRISP3,BIRC2,COL15A1,UTRN,F13B,IK,NDUFA7,CHCHD3,ALDH1L1,HIST1H2BB,MAN1A1,RPS16,SEC61A1,RXRB,EZH2,PTGDS,PLCB4,SLK,CPNE3,SMAP1,PLG,FUBP3,NCBP2,SAFB,CARS2,NOLC1,CPB1,SOD3,RPL12,RPL22,CLTB,RBM12B,STT3B,CDH13,ZNF143,SRSF4,TCF25,RBM33,SRSF7,UBE2S,RPS19,F10,RBMX,GRIP…
0.0010696792938657	PRRC2C,THRAP3,CUL4B,CDC5L,SRPK2,RIOK1,SNW1,SNRNP200,PRPF40A	PCNP,EIF3C,PNN,NUP93,RPS26,SCGN,SUMO3,PRRC2C,MCMBP,MAEA,SENP3,THRAP3,ZFAND3,OTUD4,COMMD3-BMI1,RTF1,ARID1A,RPL32,EIF3G,RXRB,RPS15A,ARIH1,CDC16,NUDT1,TXLNA,ELOA,SRRT,GATAD2A,RTFDC1,BLOC1S5,MARK2,MARCKS,ELP4,ZNF787,ANAPC4,ERCC5,RNF113A,EIF4B,CUL4B,MIB1,ATXN2L,FNBP4,RPS11,PELP1,EIF3E,TARBP2,RPL35A,RCL1,RPS3,MTERF3,NLE1,POLR1E,BYSL,NUF2,CDC5L,DIMT1,SURF6,TSR1,SAE1,SRPK2,ACTA1,PHC2,DDX54,MAIP1,CORO1C,A…
0.000991454699443184	THRAP3,SNRNP70,SFPQ,CUL3,FOXA1,PHF5A,CDC73,ISY1	PNN,ZFP91,SRRT,YLPM1,PRRC2C,MARK2,GATAD2B,SLTM,THRAP3,MAEA,COX17,RPS26,SMC1A,TCOF1,SRSF3,SERBP1,MFAP1,ZFAND3,SNRNP70,ARID1A,RPS29,ZC3H13,GATAD2A,SFPQ,SETD2,MGLL,PKP3,BRCC3,ZRSR2,CUL3,DNMBP,DCLK1,AGTPBP1,VPS26A,CORO2A,DSC2,NAT10,PWP1,PHKA2,CIAPIN1,MAD1L1,SMIM12,TRUB2,SNAP23,CCNY,COPB2,MED22,ZC3H15,SARNP,EIF3C,PRTFDC1,SCAF4,MBD2,PALM2-AKAP2,ZCCHC3,BLOC1S2,IDNK,AP4S1,STK38,ORM1,COL4A3BP,RAB25,CUTA,F…
0.00304333357490119	YBX1,CUL3,EZH2,LUC7L3,ZC3H18,SFPQ,HTATSF1	PNN,GATAD2B,ZFP91,SRRT,YBX1,SMC1A,ARID1A,EIF3A,BOD1L1,SRSF3,SERBP1,CWC22,CCDC9,THRAP3,ZNF787,ZNF24,PRRC2C,UBAP1,SRFBP1,HDDC3,YLPM1,TBCA,MARK3,ZC3H4,RXRB,ZC3H13,SETD2,RPS11,CUL3,TWISTNB,MED15,ZC3H15,CASC3,EEA1,SYNPO2,EIF2S3,EZH2,RRAGC,STAT6,SNAP23,HGS,GSS,COMMD5,SMARCB1,ENSA,BPI,ELANE,ZNF385A,WNK1,LUC7L3,DENND3,CCDC58,ADRM1,CTSH,SON,ZC3H18,PRPS1,PDCD6IP,POLR3A,MMAA,EFHD2,PGGT1B,COA5,EEF2K,SCAF11,N…
0.000947678948702191	SMC1A,SRSF3,ARID1A,PPIL1,PNN,MFAP1,SRSF7,SNRPD2,RAE1,LUC7L3,ARCN1,WDR33,HNRNPA0,RB1,SNRNP70,IK	ZFP91,GATAD2B,RBM14,RPS11,MAEA,SUMO3,RPS26,SMC1A,PRRC2C,PHF5A,CLTB,SRRT,SRSF3,ATXN2L,MARK2,ARID1A,RBM6,ISY1,NDUFA7,PPIL1,PNN,RPS29,SERBP1,YLPM1,NDUFS6,RPS18,TBCA,SMAD5,UQCRQ,FNBP4,RPS20,SAFB2,ITFG2,MFAP1,SRSF4,CHMP5,CHCHD3,APOD,ZNF609,NUDT18,SRSF7,F11,RPL28,SNRPD2,BRD9,C19orf53,C7orf43,CSN2,COMMD3,CRISP3,SZRD1,LSM12,PRKAB1,ZC3H13,SMARCA4,RAE1,BRCC3,MAP7D1,RBCK1,PPHLN1,CBLL1,LUC7L3,SBSPON,DYNLRB1,…
0.00198926789257468	SNX29,RAB9A	PKN1,LRCH3,CTSK,LSP1,RPL17,LPXN,TRAPPC6B,COMMD4,COLGALT1,DOCK9,CPSF4,AP2S1,BRCC3,COMMD2,SF1,CISD2,COMMD5,LIMK1,TLE1,SSFA2,SERPINB9,DR1,SNX29,TAF7,MORF4L1,RPRD2,CPSF6,PLEKHF1,CFI,GRAMD1A,BPGM,RAB9A,PRR36,PDCD11,TOPBP1,PRPF31,INPP4A,EHD4,MSL3,ATP6V1D,SNX18,LMAN1,EHHADH,SGTB,CASP3,ARHGAP27,SNAPIN,FAM103A1,NECAP2,MRTO4,SFXN4,DTYMK,COMMD6,BRAF,MTIF2,DTNBP1,REEP4,ERBIN,GRAP2,NIP7,PHC2,TWF2,CAMK1D,ARHGA…
0.00166420021061887	ABL1,NF2,SPTAN1,SRRM1	ZFP91,PNN,SMC1A,GATAD2B,MAEA,RPS26,ARID1A,MARK3,RBM14,PCNP,SETD2,RPS29,SUMO3,TBCA,PRRC2C,MARK2,ZC3H4,SRRT,YLPM1,RSRC2,CLTB,ASNA1,GATAD2A,MMRN2,RPS5,MIOS,GMPR2,RAB8A,SH3GLB1,NOLC1,ECE2,PPIA,RPL32,YME1L1,MSRB3,PPIH,FHL1,ZNF609,SLAIN2,PABPC1,CTCF,RPP30,SMARCB1,RAB1A,FBN1,CEP120,SEC11A,AGO2,ABL1,SRSF7,PPAN,RPL35A,GATAD1,MED21,MRGBP,TMEM189-UBE2V1,LSM7,CAVIN1,SEPT7,ORM1,PSMD4,TRIP11,GIT2,NF2,TCOF1,UCH…
0.000309850526737023	SP100,PML,RANBP2,NUF2,IFI16	SP100,ZC3H15,HELZ2,ARAF,SRSF9,CCAR1,CNDP1,DTX3L,PML,GBP4,ZC3HAV1,FAM96A,AGT,RANBP2,IRF9,USP9X,MTMR1,EIF3E,APOH,MCMBP,MFAP2,RBM10,CSTF2T,NONO,U2AF1,HNRNPA3,HPX,TRAPPC3,VCPIP1,ARIH1,GBP1,RPL30,DPH2,STAT1,NUF2,TRIM22,ELAVL1,NID1,THOC2,CSN2,CXorf38,IFI35,CNP,EEF1D,LCP2,PGLYRP2,CHERP,TAP2,CD99L2,XAF1,SLC5A6,IARS,PLRG1,PHF5A,FXR1,ATF7IP,PRPF6,SF3B1,F2,APOA1,NFKBIE,PLG,LIN7A,TAF7,GC,RPS19,ISG15,MTA3,IFI…
0.00296090371111185	SUMO3,UBE2I,ZNF706,AGL	TTC39C,MYL6,BLNK,TPMT,NECAP1,PRKAG1,ZNF217,ATP6V1F,PRKRIP1,LYPLA2,RPL35A,OTULIN,MAGED1,NFATC4,CCDC88C,SUMO3,MED24,UBE2F,GPKOW,TXLNG,DPP8,FAM98B,PPCDC,CAMP,BORCS6,PGGHG,PHKA1,EPM2AIP1,ROGDI,CHMP2A,ABHD16A,UBE2I,SNAP29,SEC24C,TCP11L1,TOM1,TAOK2,ATXN2L,PYCR2,TCEAL3,VPS35,ZNF706,CHTOP,EHD3,VPS72,SRP54,DEF6,UCK2,CHID1,STX10,MKRN1,LEMD2,NARS2,TRMT1L,B3GAT3,CCDC25,BRD3,GRPEL1,GHDC,ACSS1,TBPL1,HDHD2,MMP1…
0.000939174336733306	SPIN1,C11orf84,ELAVL1,ARRB1	CSTF2T,SIN3A,HNRNPM,SPIN1,RANBP3,CPSF7,MEPCE,SNRPD2,RBM10,CHD4,RBMX,EHMT1,UBTF,SULT1A3,TRA2B,EDC3,PON1,ZC3HAV1,ADNP,ZCRB1,ZMYND11,CP,LEO1,NBN,OTUD4,ATG12,CELF1,ZNF638,NAA15,EXOSC10,ANXA1,SMC1A,KANSL2,WBP11,GATAD2A,SSB,GPX1,CPN2,SMARCC2,SCAF11,FAM136A,TAPBPL,STK24,MAN2B1,HADHA,HMGCS1,PTGDS,PEBP1,GSR,ILF3,RETSAT,ABHD5,ME2,PPP3CB,NCOA1,C11orf84,ELAVL1,CEP192,PFKL,LSM6,DHX16,SEPSECS,ALG5,PUS7L,MORF4L…
0.00140924936565228	SPTB,SPTA1,ANK1	SPTB,CA1,HBD,AHSP,EPB42,SLC4A1,HBB,SPTA1,ANK1,SNCA,WARS2,BPGM,CLIC6,UBA7,CTNNB1,RNF169,HBA1,VDAC2,FAM172A,HBG1,SREK1,TRIM28,OGN,TIMMDC1,CMC2,PRDX3,MID1,EEF1D,LAMB1,FBXL8,ENPP1,RGS3,UNK,SF3B4,NAT1,COMMD10,FAM98B,CD47,MAT2A,ARL2,PDHB,FKBP9,SUFU,PARP2,TAP2,C9orf64,GRN,HMGB2,GP2,FBLN7,ANKFY1,MXRA7,NBAS,SPC24,TOR1AIP2,TRIP6,MED9,ARHGEF1,COX6B1,GREM1,RAD21,FOXO3,PIK3C2A,C17orf80,NDUFA9,MRPS24,GPATCH4,V…
6.41002700636628e-05	EPB41,SPTA1,SPTB,ANK1	BPGM,EPB41,SPTA1,SPTB,CA1,EPB42,HBD,HBB,ANK1,AHSP,SLC4A1,YOD1,CRYBG1,HBA1,SPOUT1,RUFY1,MSI2,EHD3,DMTN,HSPB11,PALLD,CPB1,MAP3K7,SNCA,CNOT10,CLP1,INPP5B,FAS,CCDC93,YME1L1,CDKN2A,PPP1CC,NDUFA11,BPI,HTRA2,EXOSC6,NDUFA10,DYNLRB1,GATAD1,SRP19,PAFAH1B2,POLR2D,CPEB2,FAM96B,RPS15,SLC25A35,PDE4D,NDUFA5,NDUFV2,NUP35,MED15,ALG1,USP11,ARHGAP45,LTF,PBDC1,METAP1,MAD1L1,GNB2,SMYD5,NSRP1,GTF2A1,BTF3L4,UBE2N,UBL7,…
6.41002700636628e-05	SPTA1,SPTB,ANK1,EPB41	BPGM,SPTA1,EPB42,HBD,POLR2D,SPTB,DMTN,SLC4A1,RPL29,ANK1,HBA1,ZCCHC8,EXOSC6,CA1,SPOUT1,SUMO2,AHSP,SON,ARL2,NEMF,FCER1G,PTBP1,PHF5A,ATP5A1,U2AF2,CAT,EPB41,GDPGP1,TOR3A,RPL28,RPL34,HBB,HBS1L,DCAF8,NDUFA7,TBCA,INTS12,RCC1,RTN4IP1,SLC2A1,AAMDC,ATXN1L,DDX59,MRPL39,FEZ2,MFAP1,SNRNP70,PCBP2,COX6B1,SUMO3,TYMP,BZW1,NDUFS3,TMEM189-UBE2V1,HNRNPDL,WDR7,SAP30L,BOD1,CFP,MAPT,NSMCE3,ACAN,ELAVL1,EIF3G,RPL26,DNTTI…
0.00162099654421629	SQSTM1,DVL2,LIMD1,DLST,GEMIN4,WDR81,FLNB,SMN1,LLGL2	TXNRD2,SQSTM1,LETM1,MMP14,DVL2,ALDH5A1,CDH5,TNC,HEATR1,TTC13,MTX2,COPRS,HNRNPD,CDC42EP4,ARHGAP5,MAGI1,HADH,ENPP4,ANKFY1,LARP1B,DUT,MGST3,PDZD11,LRIF1,MPP7,CHEK2,H2AFY2,RBM47,LIMD1,PABPC4,UBE2G1,MYH11,COX2,PSTPIP1,N4BP1,DLST,ACOT13,UQCC3,MRRF,KCNAB2,NDUFAF6,UBXN6,RPL19,PALD1,RPL27,METTL14,ITGA5,TTC9C,RALBP1,SUCLG2,NDRG3,CNP,HNRNPK,IVD,CBR4,CPSF4,GEMIN4,ECH1,WDR81,GPR89A,ANKRD13A,STXBP2,ASAP2,NECTI…
0.00854121907456476	SRCIN1,SORBS3	IKBKB,CFHR2,VAMP8,SYNPO,SRCIN1,PRPSAP2,CSRP2,PARVA,ADH5,FLNA,CAP2,PLXNB1,GLIPR2,ANKS1A,PM20D2,FBLIM1,AGPAT1,FILIP1L,PDLIM3,LRBA,PDLIM7,LAMA4,MYH10,MBP,PEX14,TBCEL,TGM2,CRIP2,HSPG2,TPPP,ARHGEF17,PRKG1,AHCY,PKIG,RIC8A,TNS2,NUF2,BSDC1,NKIRAS2,CRYAB,SVEP1,ASPM,LPP,BET1,DDAH1,SPTBN1,SOS1,MORF4L1,KRT7,ITPR2,DIAPH1,PFDN5,HNRNPC,HSPA12A,ZFHX3,ADD3,WDR46,TPM2,NOMO3,SORBS3,PLIN4,ZEB2,CCDC102A,B2M,ATP2B1,SB…
0.00854121907456476	SRCIN1,FBXO7	SRCIN1,NDC80,PRC1,ULK3,EMC9,TSPYL5,CASP7,GK,CYB5R2,BLMH,PSME4,RFTN1,ZNF281,GPR89A,MRPL14,GAS7,NCKAP1L,LRRC47,GGT5,WEE1,B3GAT3,ANKRD16,MCM3,PHIP,IFITM3,IDUA,NUDT18,UBE2B,LUC7L,CLCN7,QKI,UPF2,ARAF,TRIM36,FAM172A,TRIM2,ARFGAP1,RFC5,SNTA1,ATP6AP1,PBK,INHBA,AARS,PLGRKT,SAR1B,UBXN2B,PLEKHF1,NCAPG2,TROVE2,NAA40,SCP2,RAB7A,PRKAA2,HAUS2,NPM3,NSRP1,PHC3,NADK2,NDUFB11,JPT1,PPP6C,TTC9C,AP4B1,FBXO7,HSDL2,ELMO…
0.001923602756755	PNN,SNRNP70,PPIE,PRPF6,SARNP,SEPT9,PPIL1,PSMC1,SRRM1,RPS5	PNN,RPS26,ZFP91,SNRNP70,ZC3H14,ATXN2L,MAEA,PTBP1,ELOA,SLTM,RBM14,TPR,ZC3H13,PPIE,NCBP3,ZFAND6,MARCKS,WNK1,PRPF6,TARBP2,SARNP,ATP5B,RACK1,ARID1A,XRCC1,CDKN2AIP,IK,ZC3HAV1,FAP,PALM2-AKAP2,MARK2,DCLK1,SDCCAG3,SAMD1,SNUPN,KANSL2,MTX3,VCL,PDE6D,BUD13,CHMP5,RBM12B,CCDC93,IGLL1,PDE12,TNS1,USF2,LSM7,RAB8A,SLC16A3,CHMP1A,ZCCHC3,PRRC2C,ZRSR2,VBP1,CHMP4B,SAFB,SRRT,VPS26A,TMX1,XAB2,FAM76B,SEPT9,JCAD,BRCC3,BP…
0.000125793800241188	MYL6,PPIE,U2AF2,PNN,SARNP,GSK3A,PPIL1,RPS19,API5,SNRPD3,ZC3H18,YWHAH	RBX1,HPS3,LRRC40,NOLC1,LTF,MYL6,EXOSC3,SRRT,PSMD7,LSM12,PNPLA2,SCOC,CNOT7,FGGY,MED9,SP3,WTAP,PHKG2,PPIE,ARL3,CRELD1,ARF5,U2AF2,ARHGAP12,ZYG11B,LAMTOR3,S100A9,MRPS10,PNN,SARNP,INTS12,MELTF,LIMD1,PABPN1,PEX5,BAG5,ARID1A,PPP1R12B,EHMT2,GSK3A,NCBP3,HADHA,ZBTB14,RPL32,MAX,ACTG1,MED24,HACL1,PPIL1,FBXO28,HDGFL2,AP5B1,CINP,COMMD9,TBPL1,GOLGA5,RPS19,API5,NUMB,PSMD4,ELOC,FAM76B,TOP3B,FBXL8,SEPHS1,CDKN2AIP,…
0.00646076915386994	ELAVL1,SRRM2,RBM25,SNRNP70,HNRNPM,HNRNPA2B1,ZC3H18,CDK12,SNRPD3	SP1,SRSF6,NFIC,COX17,RCN3,NSRP1,SAMD1,XRCC1,ELAVL1,EMD,SRRM2,SPRYD3,ACTBL2,CHURC1-FNTB,YLPM1,DAP,CIR1,EXOSC6,VEZF1,JPT2,NFXL1,YTHDC1,LAMTOR2,IFT81,PLCG1,MYL9,SRRT,LSM3,SH3BGRL2,SKP1,ZC3HAV1,ERAP2,ENO1,CNOT7,ZC3H13,YY1,COA7,RIC8A,MYO1E,ZMAT2,MRPS18A,TCEAL4,ANKRD13A,SLC38A10,TOR1AIP2,RBM25,DIP2A,NOVA2,SNRPG,HDGFL2,AP2B1,TMEM263,HYI,SNRNP70,CNRIP1,TIMM8B,RAB1A,MED22,HNRNPM,RABIF,PRR12,RTFDC1,HNRNPA2…
0.000125793800241188	SNRPD2,MYL6,PPIL1,SART1,RTF1,SON,CUL4B,PNN,ISY1,PRPF40A,MTA2,EED	ZC3HAV1,SNRPD2,RING1,RNF113A,GOLGA3,TRAPPC2,MYL6,PIGT,MSRA,BUD31,PDS5A,RPS15A,SETDB1,RABGAP1,PPIL1,WTAP,SLC4A1AP,ZNF598,SFSWAP,PHF5A,EIF2S1,USP8,SART1,RTF1,CREBBP,ING3,COA7,SAP130,SRP68,PLTP,UBTF,EIF3G,SNTA1,RABGAP1L,DDAH2,PPP1CA,SUMO3,GPATCH8,RANBP2,THOC2,CD99L2,RBM15,SMC3,CHGB,POLR2A,DBNL,YTHDC1,ADGRL2,RAVER2,SRRT,EDC3,GOSR1,RBBP6,RBM14,LGALSL,ARL6IP1,DNAJC2,INTS5,SUMO1,RPL35A,SON,CHTOP,DNAJB12…
0.000516403780385442	PNN,SARNP,ISY1,DNAJC8,ACIN1,PRPF6,ZC3H18,NDUFA7,SMARCC1,SRSF4,CDK12	PNN,ZFP91,GATAD2B,CLTB,SRRT,YLPM1,SUMO3,ARID1A,MARK2,PSMD9,PRRC2C,RBM14,SARNP,MAEA,ISY1,RPS11,RSRC2,SRSF7,PPP1R12C,DNAJC8,ZNF787,HDDC3,SRSF3,ATRX,SMAD5,RPS26,ATXN2L,FNBP4,TBCA,MRPS10,CARTPT,PCNP,CHMP1A,RPS18,CDKN2AIP,CHCHD3,TMEM189-UBE2V1,ACIN1,GNB1L,MTX3,ZFYVE21,NCBP3,PRPF6,SH3BGRL2,ZC3H18,RPS27L,EEA1,SYNPO2,NDUFA7,SH3GLB1,STIP1,CAPZB,SAFB,DCLK1,SAFB2,U2SURP,COA6,CNRIP1,LALBA,TRAFD1,EIF3A,THRAP3…
0.000125793800241188	RBM25,CDC73,SRSF1,RPS5,NONO,U2AF1,RPS19,EEF1D,CUL4B,SNW1,BCAS2,SRRM2	BUD31,ELOC,RANBP2,SUMO1,DPY30,SUPT5H,CPSF4,CHERP,RBM26,RBM25,SLIT3,NUP93,HDAC4,SETDB1,TOP1,GATAD2A,SAP30,MTR,ZC3HAV1,CDC73,POLR2F,ARPC3,SNTA1,SRSF1,HUWE1,STIP1,ACLY,RPS5,DCLK1,AGT,UBE2V2,SRP72,SRSF2,NAA10,NRF1,AKAP8,ROCK1,NONO,PHF5A,BBS1,CTNNBL1,DPYSL2,DNAJC2,NUPL2,EIF3C,SIN3A,SLC4A1AP,PLRG1,NHP2,U2AF1,RPS19,RBM14,CSTF2,SAFB,WTAP,RPL27A,NCOA5,EEF1D,NCBP2,YTHDF3,IL18,ARMC6,TXNDC9,VASP,MAP3K7,USP8,…
0.000516403780385442	SRSF1,LUC7L2,ELAVL1,SRRM2,U2AF1,SRP14,SNRPA1,RBM25,SF3B4,PRPF6,DDX50	UBE2V2,SMU1,SRSF9,SRSF1,LUC7L2,ELOC,ELL,CPB1,NRF1,CCAR1,SLC4A1AP,ELAVL1,CPSF4,DPY30,SRRM2,HDAC4,LSM6,U2AF1,SRP14,RBM10,RNF7,BUD31,SNRPA1,RSRC2,EXOSC1,EXOSC6,DARS,NUP93,RBM25,SF3B4,RANGAP1,SH3BGRL2,MTR,CELF1,POP1,TTC9C,BBS1,STIP1,PRPF6,FAM96A,EIF4G1,CRIP2,CCDC124,NEURL4,CHERP,FAM122A,BABAM2,BTD,CHMP3,AOX1,PLTP,ABI3BP,ARPC3,ATP6V1G1,GSKIP,PELP1,TBC1D13,CSTF2T,TTR,EHD3,BBS7,INTS5,U2SURP,EPS8L2,CD209…
0.001923602756755	LUC7L2,U2AF1,CHD4,SRSF1,ELAVL1,SON,NONO,RPS19,SRRM2,HNRNPA2B1	DPY30,ELOC,AKAP8,NUP93,U2SURP,SUMO1,MAN1A1,CPSF4,ACSS3,RANBP2,HUWE1,LENG8,SUPT5H,TIMM29,SLIT3,MAD1L1,PHF5A,SETDB1,AGT,DCLK1,LUC7L2,DNAJC2,BUD31,INTS5,U2AF1,CHD4,INTS13,MGLL,SRSF1,CTNNBL1,SNRPN,SRSF9,NUPL2,STRADA,ELAVL1,NAA10,TRAF5,IFT80,MRTO4,SON,SCGB2A2,MFAP4,ECM1,BRD4,NONO,EIF5B,ARPC3,NHP2,GTF2F2,TXNDC9,RBM14,MOCS2,YTHDF3,RPS19,ISG20L2,CEP120,SETD7,KIF16B,SPAST,CPEB4,SRRM2,EHD3,COA7,TANGO2,HDAC…
0.000516403780385442	NONO,ELAVL1,LUC7L2,SRRM2,RPS5,PRPF6,U2AF1,RNPS1,RPS2,SNW1,RBMX	DPY30,BUD31,NUP93,UBE2V2,HDAC4,AKAP8,SUMO1,TTR,LENG8,RANBP2,REPIN1,ACSS3,NONO,CPSF4,ELAVL1,LUC7L2,CTNNBL1,POLR2F,YTHDC1,BPIFB1,AGT,MTR,SRRM2,NAA15,CHERP,RPS5,TOP1,SLIT3,CRIP2,PRPF6,UMPS,SRP72,TTPAL,SSRP1,TAF7,U2AF1,RNPS1,TSPYL5,CPB1,MAD1L1,NHP2,SUPT4H1,CUL1,RPS2,ERP29,AMPD2,SYBU,SNRPN,ELOC,ZC3HAV1,SAP30,EIF3C,NUP153,RDH13,RBM14,PLRG1,TRIM36,H3F3A,AGTPBP1,PPM1G,SFRP2,F11R,DNM1L,TXNDC9,THOC2,MINDY3…
0.001923602756755	PRPF40A,SART1,PIH1D1,CUL4B,DDX1,HNRNPC,SNW1,STAG2,RBM8A,RPS5	PIP4K2B,PPIA,CTSF,AIDA,ORM1,BRD2,TTR,GSS,NSMCE2,PPM1G,IK,SCAF11,BCLAF1,SELENOM,TDP1,S100A7,PRPF40A,FAM111A,IRF2BP2,XPO6,ING3,PCBD1,SART1,MAGED1,PWP1,CAB39,F2,APOH,BBS1,SMNDC1,ELL,BAZ1A,UTP6,DHRS11,A1BG,LDAH,ZNF579,RTN3,KATNB1,MIB1,MARK3,PQBP1,CIAPIN1,GPR107,LUM,TSC22D4,TRAPPC2,BORCS7,DSP,VIPAS39,CLCN7,INPP5K,MCUR1,SRP68,APRT,MKRN1,CD180,PIH1D1,INO80C,FUS,UTP3,CUL4B,EIF3C,IGF2,DPT,DDX1,ITGAL,LENG8…
0.00646076915386994	PNN,PPIL1,ZC3H18,YBX1,RBMX,ISY1,SFPQ,RPS19,HDAC6	ATXN2L,ZFP91,RBM14,ZC3HAV1,PNN,SRSF3,RPS26,RPS11,COMMD10,ACTBL2,SRRT,VAMP8,RPS29,ARID1A,MTDH,MAEA,ZDHHC5,CD46,INTS12,EIF3M,SNAP29,CRELD1,RPS20,PPIL1,RALY,XRCC1,ZNF787,TBCA,VEZF1,ZNF330,PYM1,TPD52,LSM6,RBM22,TMEM106B,HDDC3,SP3,RSRC2,BPIFB1,ZC3H18,SOGA1,ZRANB2,GCC1,GATAD2B,EIF5A,PSMG4,UBN1,TBPL1,MARCKSL1,ATP5J,NDUFA11,ARCN1,RPS18,COX17,HSPB11,BCLAF1,MAZ,PCYT1A,ZC3H13,MFAP1,ZNF638,YBX1,RBMX,ATG101,M…
0.00646076915386994	PPIE,SNRPD1,XRCC6,DHX15,MYL6,DHPS,DNAJC8,RBM39,U2AF2	SRRT,RCOR1,INTS14,PPIE,AP5B1,SNRPD1,C5orf24,WDYHV1,ZFP91,XRCC6,DYNC1LI1,ZNF280D,MICALL2,RBX1,FBXL8,SDCCAG3,NFATC2IP,HACL1,PSMC3,POTEF,NUP37,NAA50,TIA1,EXOSC7,ARF5,RXRB,NDUFA11,RACK1,PDIA6,CHMP1B,HIST1H3D,SMAD5,ZNF460,LSM12,CTDSPL2,INO80E,FAS,NUDT15,PCBP2,BLOC1S5,JPT1,USP15,LSM6,DHX15,COPS8,OGFRL1,RPS18,NIT2,PCNP,DPM3,KANK3,HBZ,AZI2,MYL6,SAR1A,DPH5,PTBP1,ANAPC1,AASDHPPT,CHCHD3,SZRD1,GPS2,SELENOP,R…
0.000516403780385442	PPIE,SARNP,U2AF2,PNN,VCP,PPIL1,YBX1,RBMX,ZC3H18,RPS19,RPS5	SOD1,ZFP91,PPIE,GDI1,TBCA,RPS26,SRRT,RPS29,PCNP,MAEA,MARCKS,ZNF24,NDUFA11,SMAD5,SUMO3,RPS18,SARNP,RPL32,U2AF2,GATAD2B,NOL8,CFP,SETX,MARK2,RTCA,EIF5A,ANAPC4,PNN,TSSC4,VCP,GAPDH,PTBP1,NUP43,FMNL2,NUTF2,RANBP9,SETD2,SRSF6,FCER1G,CCT4,PPIL1,NAP1L1,YBX3,ZNF574,YRDC,FAM76B,POLR2D,NHEJ1,SARS,RCOR1,CCS,BLOC1S5,RPS20,YLPM1,ARF1,C19orf47,ARID1A,NFX1,PLA2G15,AGO1,PRRC2C,DENND1A,YBX1,RBMX,C1orf174,ZC3H18,PRR…
0.00646076915386994	CHD4,DDX3X,SON,RBM25,CDC73,RPS3A,SRRM2,SF3B1,ZCCHC17	CHD4,SMARCA5,DDX3X,UBAP2,TTR,EIF4G1,PPCS,RRP1B,TOP1,SON,ZRSR2,RBM25,DCLK1,ZNF598,GCN1,A1BG,C1orf122,ASCC3,FKBP2,ATL2,CAVIN1,CDC73,RBM10,RPS3A,BTD,TRAPPC2,NAT10,SETD2,ABI3BP,TBL1XR1,CCNL1,RTKN,SPOUT1,INTS3,HRG,RANBP2,RPS29,DARS,POLR2B,HGFAC,BMS1,SRRM2,NUP93,GC,SUSD2,LSG1,MTR,DNMT1,PPP1R14A,YPEL5,KIAA0907,GLRX2,EIF3C,SOD2,STIP1,FGF1,PLRG1,DDX24,SF3B1,LIN7A,ZNF638,C19orf47,CKAP5,GFRA1,MED25,MAN2A1,P…
5.69800515947886e-06	PRPF6,CUL4B,PNN,SART1,SFPQ,RBM25,SF3B1,RPS5,CDC73,SON,ABCF3,LUC7L2,SLU7,CDC5L	PRPF6,ZNF598,FBXO28,PPM1G,HMGB2,DDAH2,CUL4B,POLR2A,PNN,SAFB,REPIN1,EMC4,SRFBP1,ESD,TTR,ELOA,SH3BGRL2,AHSG,AKR1C3,AGT,SART1,ILKAP,TBC1D10B,SRRT,SFPQ,ARID1A,TOP1,GPATCH8,RBM25,ZNF687,CREBBP,SP1,SRP68,EIF3C,SF3B1,TMOD1,MYL12A,CD3EAP,SETD2,GPX3,ZC3HAV1,RPS5,PDS5A,ALDH1A1,SERPINA4,SIN3A,ATXN2L,CDC73,C1orf198,SON,ABCF3,WDR46,DKC1,SEC24D,ANXA2,SBSPON,TIMM29,CEP290,BRD1,ORM1,VCPIP1,NID1,THRAP3,LENG8,PRR3…
5.69800515947886e-06	RBM25,PRPF6,CUL4B,SFPQ,PNN,ABCF3,SON,SEPT2,ACIN1,SART1,SF3B1,RPS5,EIF3H,SRRM2	RBM25,PRPF6,FBXO28,SAFB,RNF40,ARID1A,ZNF598,CUL4B,RBBP6,ESD,PNISR,SRP68,PTMA,EIF3G,GATAD2A,LRCH1,PPM1G,AGT,SFPQ,TTR,ILKAP,SETD2,TIMM29,REPIN1,PNN,ABCF3,SON,ADGRL2,DDA1,MEPCE,NELFA,GPX3,SRRT,NSRP1,SEPT2,ELL,GPATCH8,ATRX,TMOD1,EHD4,ZC3HAV1,SIN3A,PAPD5,ZNF687,ACIN1,SART1,BCLAF1,MRPS12,CD14,SRFBP1,SF3B1,SULT1A3,CPNE2,CCDC9,TCOF1,REEP4,RPS5,SERPINA7,HMGB2,EIF3C,POU2F1,DCAF13,SERPINA4,LIN7A,LENG8,EIF3H…
5.69800515947886e-06	CHD4,PRPF6,SFPQ,CUL4B,SNRNP70,CDC73,SF3B1,ZMYND11,SF3B2,PPIL1,SRRM2,NKAP,ILF3,TNIP2	CHD4,TTR,MARK2,ZNF598,NOLC1,RBBP6,PRPF6,PPM1G,EIF3C,SAP30,SERBP1,NUP93,SFPQ,PLRG1,CUL4B,SNRNP70,CDC73,PGLYRP2,SNUPN,UTP3,BPIFB1,BCLAF1,SF3B1,ANAPC2,HDGFL2,SAFB,ZC3H13,ATP5D,GPATCH8,REEP4,THOC2,ARGLU1,TIMM29,ZMYND11,FUT11,ZFAND6,SF3B2,TPR,TRAPPC4,RBM6,RBM26,NELFA,LYVE1,NOL7,CD14,PQBP1,MED8,PRKAR2B,IK,MRPS5,PLCL1,SRP68,ACSS3,IRF9,POLR2J,TSC22D2,ALDH1L1,DYNC1LI2,PPIL1,C7orf25,A1BG,SRRM2,MRPL47,FUNDC…
0.001923602756755	PNN,NDUFA7,ZC3H18,ISY1,YBX1,SFPQ,HNRNPA3,SRRM2,SRP14,CDK12	SLTM,BOD1L1,MAZ,MARCKS,MARK3,SMC1A,BLOC1S5,SDE2,PNN,MRPL57,RBBP6,NDUFA7,ZNF787,RANBP9,RABGAP1L,SETD2,ZC3H13,YLPM1,AP5B1,ZNF24,FNBP4,PRRC2A,RPE,SRRT,RPS21,ZC3H18,ISY1,GID8,RSRC2,TMEM263,BRPF1,GATAD2B,NFYA,YBX1,TSSC4,PRRC2C,TCOF1,MRPS18A,UBL5,THRAP3,PNISR,DENND1A,CWC22,HGS,PCNP,INTS12,PRKAB1,SCAF8,SZRD1,SFPQ,ACTBL2,CENPB,LAMTOR2,YBX3,PPP1R12C,CDKN2AIP,RBMXL1,MAEA,SURF6,COMMD3,TSC1,ZC3H4,FKBP1A,HNRN…
0.00646076915386994	GTF3C6,PRPF6,ZC3H18,PRPF40A,SNRNP70,RPS19,PPIE,MYL6,HSPA8	EPHB4,ATP6V1F,UBE2I,NUDT15,ATAD2,ARHGEF10L,KLHDC2,CLEC3A,MBOAT7,DNAJA3,FXN,SAFB2,WIZ,TBPL1,CLEC3B,ZFAND3,SHKBP1,ARF1,SLC16A3,LPIN1,ABHD14B,GTF3C6,SP1,SCLY,PRPF6,ZC3H18,DYNLRB1,COPE,TEX264,WISP2,PRPF40A,OGT,TXNDC17,SNRNP70,RBM14,WTAP,MAGT1,RPS19,NAE1,SNRNP27,OSGEP,PPIE,GOSR1,RAD21,MYL6,ATP1B1,BLVRB,FAM168A,CLTB,ALOX15B,P2RX4,CSTF3,CCDC149,RETN,ATG13,UBE2B,VPS13A,COL16A1,ZNF598,SPATS2L,NFYC,XPA,CMP…
0.00646076915386994	PNN,NDUFA7,ISY1,SBDS,SRSF4,SFPQ,SNRNP70,ZC3H18,YBX1	PNN,GATAD2B,ATXN2L,SRRT,ZFP91,SUMO3,SLTM,PAIP2,TBCA,CLTB,PRRC2C,SELENOW,SRFBP1,CCDC9,SETD2,TMEM263,CCDC86,MRPS18A,RPS29,ZC3H13,SAR1A,SMC1A,EIF3A,MARCKS,BOD1L1,SRSF3,ZNF24,NDUFA7,ISY1,TES,RBP4,SNRPA,IGLL1,ORM2,SERBP1,LSM7,SERPINA4,PITPNA,NOLC1,SPAG9,LYVE1,DNAJB6,RBM12B,APCS,IGFBP5,GPD1,SBDS,LUC7L3,SRSF4,SFPQ,AKR1C2,ITSN1,SNRNP70,WRAP53,EIF3C,TSR3,ACTL8,RRAGC,AHSG,ELOA,RRP9,POT1,GLOD4,HUS1,PGAM5,NX…
0.00646076915386994	PNN,SARNP,ISY1,RTF1,SNW1,ACIN1,RBMX,RPS19,MTA2	ARID1A,PNN,GATAD2A,POLR2A,SARNP,EIF3A,RPS11,INTS12,RBM14,SMC1A,ISY1,ZC3HAV1,TXLNA,THUMPD2,TPR,RPS26,GID8,SRFBP1,RPS18,GATAD2B,TCERG1,PTBP1,PPP1CA,RPL32,ACTB,RTF1,SNW1,NCOA5,ARF1,SETD2,CUTA,ACIN1,HS1BP3,RPS29,RBMX,POLR1B,CNBP,CUL4A,NAA10,ECM1,CTTNBP2NL,PHB2,DYNLT3,SMNDC1,CAPNS1,ERAP2,RPL17,SDHA,UQCRQ,SYF2,POLR2F,WDR45,ACTA1,DKC1,FAM120A,KRI1,PPP2R2A,GCC1,TMED2,RPL27,SORBS3,CMC4,RPS19,CAMK2G,GNL3,B…
0.00646076915386994	PNN,SNW1,MYL6,NDUFA7,PRPF6,TERF2,EEF1B2,PRPF19,SRSF5	ARID1A,PNN,RPS26,GATAD2A,POLR2A,SNW1,INTS12,CNBP,LRPAP1,ZFP36L1,PHF5A,TPR,SUMO2,RPS11,ACTB,RBBP6,MYL6,MAEA,SUMO3,RPS29,ZNF24,HDDC3,GATAD2B,RNF113A,ZFAND6,EIF2S3,NDUFA7,SP3,ACTA1,RSRC2,ZC3H4,NAPG,POLR2I,WDFY1,YTHDC1,PRPF6,HINT1,CHCHD2,ALDH1L1,DIABLO,EAF1,LAMTOR5,RPL39,MED8,PDE5A,UBL7,NDRG1,SBSPON,SUMO1,EZH2,ERAP2,TRAPPC8,NUDT9,TERF2,PRRC1,PPP1R2,FAM136A,ZNF668,C19orf53,MED1,SELENOM,DIS3L2,RPA3,TRI…
0.00646076915386994	PNN,RBMX,SARNP,ISY1,SNW1,PPIL1,RTF1,RPL7A,RPS19	ARID1A,PNN,RPS26,INTS12,RPS11,RBMX,POLR2A,SARNP,SMC1A,ISY1,ZC3HAV1,SUMO3,YARS,SNW1,ZFAND6,RSRC2,PRRC2C,PPIL1,SRRT,ZFP91,GATAD2B,RABGAP1L,MAEA,CUTA,TG,UBL5,CCDC93,INSR,UBE2V2,NAA10,RPL27A,RPL27,RPL17,DNAJC2,CCDC47,KANSL3,SUMO1,DARS,LSM7,SDHB,NUDT16,PHF5A,NUBP1,EXOSC6,MTA3,GNG2,FAM172A,RPL18A,SMNDC1,CUX1,B3GLCT,LDAH,SYF2,MKRN1,MOB1A,WDR45,SEC16A,GATAD2A,DTNB,RTF1,RPL7A,DSCR3,RIC8A,C8orf37,CAPG,RBM6…
0.00646076915386994	RPS19,GSK3A,LUC7L2,ABCF3,GTF3C6,NONO,SON,HNRNPA3,RBMX	LAMA5,ELOC,ALDH1L1,RPS19,PPA2,NBN,WTAP,SUSD2,FGF2,CAMK1,MAD1L1,DSCR3,ARGLU1,KANSL2,HUWE1,DDAH2,HMCES,MFAP4,CEP135,BCAP31,AGRN,PAPD5,NSD2,GSK3A,MED20,LUC7L2,ABCF3,S100A1,PXK,GSTM5,SCAMP3,BCCIP,RBM10,GLRX,KDM4A,NUDT18,CELF1,DYRK1A,ZNF638,PPP3CA,HOMER3,EMC4,PKNOX1,MAGED1,INTS10,GTF3C6,ANK1,NONO,SRR,RPS16,SUMO1,YTHDC1,TTL,SON,PLRG1,CSTF2T,F9,PDS5A,HNRNPA3,HCCS,TMEM30A,RHOC,ACTR6,SELENBP1,AKAP13,COL2A…
1.06927251233508e-06	PNN,RBMX,PRPF6,RPS19,ISY1,MTA2,SRRM2,PSMC1,SFPQ,SNRNP70,LUC7L2,SNW1,CDC73,YBX1,ZC3H18	RBM14,GATAD2A,PNN,RBMX,ELL,PHF5A,RBM26,EIF3A,GATAD2B,PRPF6,CUL4A,ACSS3,RPS19,ZFAND6,GABPB1,WTAP,RNF40,ISY1,SEC24D,ACTA1,SRFBP1,SRRT,IK,LALBA,SUMO1,KDM6A,REEP4,RSRC2,AKR1C2,DARS,MED8,LSM3,MTA2,SRRM2,ERAP2,TIMM29,PMM2,RPS10,ZC3HAV1,PSMC1,HGS,NFX1,GM2A,LSM7,TG,CFDP1,BCLAF1,SFPQ,SNRNP70,ZNF579,GPD1,SLC16A3,ZC3H13,PKN1,SLTM,COLGALT1,LUC7L2,PPID,PFKFB3,GRIPAP1,ATP6V0A1,NME1,VPS45,FBP1,CARS,CD3EAP,CMC1,…
5.69800515947886e-06	PNN,EEF1A1,SNRNP70,SARNP,PPIE,RTF1,ISY1,NDUFA7,CHD4,RBBP4,PRPF6,SRRM2,YBX1,HNRNPH1	PNN,LUC7L3,NEMF,EEF1A1,MARK3,SNRNP70,UBA1,ZFP91,ACTB,RPS29,PTBP1,GATAD2B,MAZ,SUMO3,ZC3H4,SARNP,GDI1,WNK1,ATXN2L,SPINT2,THRAP3,HNRNPDL,RPS18,ROCK1,PPP2R5B,RANBP9,SRRT,LSM12,NDUFS3,TG,PPIE,SLTM,BASP1,MRFAP1,VEZF1,ACTBL2,DAZAP1,PCBP2,RTF1,POLR2D,EHMT1,C19orf47,ISY1,ZC3H14,NDUFA7,RPLP1,MED6,MARCKS,SERBP1,CHD4,LARP7,TUBG1,CLTB,MAEA,RBM26,TBCA,TUBB,RPL26,RBBP4,PRPF6,HGS,MYL9,SRRM2,SAFB,NDOR1,CPVL,VPS25…
0.00646076915386994	PPIL1,VCP,RPS19,PPIE,SF3B4,YBX1,HNRNPA3,SNRNP70,SRSF4	TBPL1,ACTG1,XPO6,RPE,RBM14,EIF3M,ZNF24,GDI2,CARD9,PTMA,MRPL34,UBQLN2,CASP3,CMC4,VAMP8,RPS4X,CREG1,AKR1A1,SH3PXD2A,PPIL1,TBL3,TMEM106B,LRCH1,ACTBL2,UBQLN4,BEND3,RNASEH2B,THOC7,ILKAP,LGALS7,TAGLN2,USP15,PPP1R12C,TMEM263,RPL35A,GRB7,FAM192A,LPIN3,SVBP,ARHGEF10L,NSMCE2,C1orf35,PRDX6,VCP,TSC1,HIST1H3D,FKBPL,CHMP4A,RPS19,PPFIBP2,PTBP1,ANXA5,PCNP,NDUFV3,GNG5,VAT1,ZFP91,PCBP2,NUDT16,GRN,AZI2,IFT122,NDUFS…
0.000125793800241188	RTF1,PPIL1,PRPF6,NONO,UTP14A,RPS5,HNRNPA1,ABCE1,MTA2,CHD4,ARRB2,ABCF3	ZFAND6,GATAD2A,SRRT,BRD4,SAFB,RTF1,SMARCA4,THRAP3,SRSF7,RPL35A,PPIL1,KDM6A,GPX1,INTS12,RBM14,EDC3,ELOC,GATAD2B,MED8,PRPF6,RPS18,SUMO1,AP5M1,SERBP1,LALBA,UBQLN2,UQCRQ,ZRANB2,REEP4,CNBP,RPL28,SAP130,SRFBP1,ARL6IP1,ARID1A,MAN1A1,ECHDC1,TIMM9,NONO,UTP14A,LENG8,RPS5,BLOC1S5,HNRNPA1,RPL12,ZFP36L2,CSTF2,ABCE1,DIS3L2,STAM2,SYNJ1,PWP1,MED22,DNTTIP1,TBX3,GATAD1,MYH11,ITPA,PPA2,DCLK1,TMOD1,MBNL1,MTA2,DDX47,…
0.000125793800241188	PNN,DNAJC8,RTF1,NDUFA7,SEPT7,SRRM2,YBX1,SFPQ,HNRNPH1,SNRNP70,CDK12,RPS19	PRRC2C,PNN,MARK2,PCNP,CLTB,ATXN2L,GATAD2B,RPL35A,TCOF1,TBCA,RPS18,DNAJC8,ZFAND3,ZFP91,RBM6,MAEA,BLOC1S5,RPS11,RTF1,SMC1A,HGS,ELOA,PPP1R12C,CARTPT,ZNF787,ZFAND6,MARCKS,NDUFA7,EIF4B,NDUFA11,MED18,LUC7L3,NCOA5,KANSL2,TMEM189-UBE2V1,IK,FERMT2,RBM14,CHMP4B,ELOC,DTX2,EZH2,OARD1,SRSF7,NUP210,KANK2,MED26,IDNK,CLTA,DENND4C,FAM136A,UTRN,SEPT7,TRIM38,SLK,SRRM2,MAZ,UNC119,CTSH,NAA15,LAMC1,TTC39C,YBX1,LRG1,AG…
0.000516403780385442	PNN,ZC3H18,YBX1,SRSF4,HDAC6,EIF3B,PRPF4B,API5,SQSTM1,SRRM2,SNRNP70	ZFP91,SMC1A,EIF3A,PNN,SLTM,YLPM1,SRSF3,PRRC2C,SRRT,SAFB,SERBP1,THRAP3,GATAD2B,ZNF787,ZC3H13,ZNF24,MAZ,ZC2HC1A,HDGFL2,RBM6,ZC3H18,YBX1,RSRC2,TCOF1,MFAP1,RBM14,CCDC9,MARK3,PCBP1,SETD2,ARID1A,SP1,ZC3HAV1,RBBP6,ATXN2L,PPHLN1,RPS10,SPAG1,TSEN34,CNBP,PNISR,APOA2,RPL7L1,MAP3K4,KEAP1,RPL35A,EDF1,NFKBIB,MRPL30,PRKAB1,WDR70,SRSF4,HDAC6,SLC39A7,YEATS4,MPP6,BRPF1,RNASE4,GABPB1,UPF1,AP5S1,C19orf47,TBCB,HCFC2,…
0.00646076915386994	PNN,SNRNP70,PPIL1,RBMX,YBX1,SFPQ,EEF1A1,ZC3H18,SRSF4	RSRC2,RBM14,GATAD2B,PNN,CDKN2AIP,SNRNP70,ZFP91,PPIL1,RBMX,LBH,PPCDC,PHF5A,MARK2,TBCA,RPS11,ZFP36L1,MRPS18A,SUMO3,BUD13,GATAD2A,THRAP3,YBX1,SFPQ,CSTF2,ASNA1,SMC1A,EDF1,EEF1A1,SMAD5,YLPM1,INTS12,ATP5E,HGS,RNF40,SAFB,ATXN2L,TMEM263,EIF2S3,SRRT,CARTPT,RPS18,CLTB,MAD1L1,SERBP1,CCDC86,LUC7L3,KCTD12,SDE2,ADRM1,RAB5C,ZC3H18,CNRIP1,CPA3,ZC3H13,TES,C12orf57,MINK1,LYRM1,RBM12B,PTMA,PAIP2,LAMTOR2,MAN1A1,AP4S…
0.001923602756755	NDUFA7,PNN,ZC3H18,YBX1,SLU7,SFPQ,PPIL1,VCP,SRSF4,SRSF11	COMMD3,SLTM,SCAF8,ZFP91,UBAP1,MAP7D1,THRAP3,PPP1R12C,HGS,RBM6,SNRPE,GDPGP1,NDUFA7,MAZ,PPIA,PPCDC,BLOC1S5,SCGN,SCAF11,PGLS,SCAF1,ZNF460,NDUFA11,HDGFL2,NOLC1,SAFB,GPATCH8,DDB1,BASP1,CLCN7,PNN,ZC3H18,YBX1,ZC3H13,USF2,CHMP1A,SLU7,CCNT2,SFPQ,ZNF787,TWF2,HNRNPDL,LDHA,WDR33,WNK1,COX17,CIZ1,CBLL1,TCOF1,PODXL,UBN1,ZC2HC1A,MED22,PPIL1,SETD2,VEZF1,C5orf24,NDUFA13,TCP11L1,CHMP4B,MAK16,C19orf70,VCP,SRSF4,TXN2…
0.000125793800241188	PNN,SARNP,ACIN1,NDUFA7,PPIE,ISY1,YBX1,PPIL1,MAGOH,ZC3H18,PPP4C,HNRNPA1	SLTM,PNN,MRPS18A,SARNP,RPS26,SETD2,MARK2,ZFP91,GATAD2B,PRRC2C,ACIN1,RPS18,INTS12,NDUFA7,RBM14,MAEA,CLTB,ARID1A,TBCA,YLPM1,C19orf47,BOD1L1,ZC3H14,TMEM189-UBE2V1,NAP1L1,HDDC3,PTBP1,PPIE,ISY1,BRD1,CPSF2,SOD1,ZC3H13,STAM,RPE,GID8,NCBP1,SRFBP1,ATXN2L,TPR,PYM1,RPS29,SUMO3,RABIF,SPINT2,RBCK1,RTFDC1,RBBP6,SEPT3,RUFY1,NOL7,TOMM70,MLST8,HBG1,RPL30,CDC42BPB,RAD21,BMS1,RPL28,WDR74,PTBP3,YBX1,KIAA1143,PPIL1,R…
0.000516403780385442	PNN,NDUFA7,ISY1,RTF1,PPIL1,PPIE,CDC73,TGFB1,PIP4K2A,HNRNPA1,RBMX	RPS26,MRPS18A,ARID1A,PNN,NDUFA7,ATXN2L,MARCKS,TCOF1,TBCA,SRRT,ZFP91,SRSF3,HGS,HDDC3,ZNF638,SLTM,INTS12,PEX5,MARK2,GATAD2B,RPS29,ISY1,VAMP8,GATAD2A,RTF1,PPIL1,CLTB,SP3,MAEA,CUTA,SH3PXD2A,LRPAP1,ZHX2,RSRC2,NDUFS7,JUND,NFATC2IP,PRRC2C,PPIE,NKTR,ZC3H14,EIF4B,LSM6,BLOC1S5,LAMTOR3,CDC73,SARM1,SZRD1,MRPS15,ZCCHC6,RBM33,SS18,RPS18,SUMO3,UBN1,PPP2R5B,RPL32,LEO1,TGFB1,VEZF1,BRD1,EMG1,SRSF7,PIP4K2A,NCEH1,GN…
0.001923602756755	PPIL1,RBMX,RPS19,PPIE,UNK,THOC6,GTF3C6,SF3B5,EEF1A1,EEF1B2	RPL28,MAP7D1,ZC3H13,HDGFL2,BLOC1S5,PPIL1,NUBP1,ZNF330,SMAD5,CHMP2B,RBMX,ZC2HC1A,C19orf53,EIF5A,DPH5,RBMXL1,SAP30L,CHMP1A,RPS19,RPL34,ZFP36L1,PPP1R12A,NMRK1,NOLC1,ZFP91,SHROOM2,ILKAP,PPIE,SUMO3,SP3,BOD1L1,SLC16A3,ZC3H4,ACP2,CNBP,MED22,COX17,PRKAB1,CDKN2AIP,UFSP2,MARK3,RPS11,RBM6,BRD4,MITF,ARF4,C19orf70,SRRT,PPP2R5B,MMP7,DHRS2,RACK1,PTBP1,PPHLN1,SIL1,MYL9,FUBP3,CD63,RHOA,SUMF1,EHD3,UNK,SLTM,ZFAND6,…
0.00646076915386994	PNN,SARNP,PIH1D1,SFPQ,PRPF6,SRP14,RBMX,MYL6,YBX1	PNN,NKTR,RBBP6,THRAP3,MRPS15,BCLAF1,MIB1,SARNP,NUP43,RPL32,DNAJB12,ELOA,FAM76B,PIH1D1,FCER1G,MAN2B2,PEX3,COMMD8,PRRC2C,SUMO2,ELL,CHD2,CBLL1,RBM14,FAM192A,FAS,MARCKS,SFPQ,PGLS,RRP8,IK,PPP1R18,CLTA,FCHO2,TCOF1,PDZD11,RALY,ISCU,RNF113A,SRRT,PRPF6,ZRANB2,SRP14,RREB1,ATXN2L,NUDT16,HOOK2,FNBP4,MED18,MUC2,KANK3,EIF4G3,RPS6KC1,BOD1L1,NOP14,WTAP,PCNP,RXRB,NOL8,RBMX,VAMP8,MYL6,ZFP91,YBX1,ELP4,FUT11,QDPR,AT…
0.001923602756755	PNN,EEF1A1,PPIE,NDUFA7,SMARCC1,ILF2,YBX1,ZC3H18,SON,HNRNPL	SUMO3,CLTB,MARCKS,ZFP91,ZC3H14,BLOC1S5,PNN,RPL29,SMC1A,MAEA,PCNP,SLTM,SETD2,YLPM1,ARID1A,GATAD2B,RBM14,RACK1,ZNF24,RPS26,MFAP1,TBCA,PTBP1,LALBA,UBAP1,SRFBP1,EEF1A1,SERBP1,CSN2,RBBP6,SDE2,PPIE,CWC22,RBM6,FNBP4,RPS18,SAR1A,PYM1,EIF4B,FAM76B,GDI1,BOD1L1,MEPCE,ZC3H4,PPP1R11,POGZ,CTCF,TRIM32,NDUFA7,KIF22,CLTA,ELOA,PGRMC2,AUP1,NOLC1,CHMP2B,CHCHD3,MED8,SMARCC1,CANX,TMX4,CHMP1B,VPS29,EIF3A,THRAP3,DMAP1,A…
0.000125793800241188	RBM25,CUL4B,ILK,LUC7L2,SRSF1,SART1,PRPF6,RBMX,SF3B1,CDC73,DDX50,PRPF3	CPSF4,RANBP2,ELOC,SUPT5H,RBM25,CUL4B,EIF3C,SLC4A1AP,CD99L2,AGT,ZC3HAV1,SLIT3,CCAR1,ZCCHC6,RBM14,GOSR1,SOS1,ILK,INTS5,ZNF598,GC,LUC7L2,NEB,SRSF1,RABGAP1,CBX3,SMARCA5,DNAJB4,BRD1,FHL1,APOH,BUB3,SART1,PFDN2,WTAP,SVEP1,PDS5A,MCMBP,SOD3,RRP1B,PRPF6,EIF3A,TSR1,RBM12B,ARID1A,SYNJ1,WIZ,EIF4EBP1,PHPT1,RBMX,SF3B1,CDC73,ADH5,PABPC4,UBAP2,NUP93,GSTM2,ENPP2,DCLK1,POLR2A,RPS29,PLOD3,DDX50,USF1,ZKSCAN1,NDUFB7,M…
0.000516403780385442	PNN,NDUFA7,ISY1,SARNP,PPIL1,ACIN1,RBMX,PRPF6,API5,SMARCC1,SUB1	GATAD2B,ZFP91,PNN,CLTB,MAEA,RPS11,YLPM1,SRRT,TBCA,ATXN2L,RBM14,NDUFA7,ATRX,ZC3H14,SMC1A,ISY1,RPS26,SARNP,FNBP4,SMAD5,PCBP1,RPS18,PPIL1,PCNP,ARID1A,WDR33,MED8,TMEM189-UBE2V1,ACIN1,SAFB2,GNB1L,CHCHD3,DNAJB4,DCLK1,NCOA5,SBSPON,SAP30,CNOT7,NSMCE3,HGS,KIAA0907,ZNF668,NOLC1,TMEM263,XAB2,FEN1,CAPNS1,EEA1,PDLIM2,TNS1,SZRD1,RBMX,PRPF6,CCAR1,FUBP3,HMGB2,NAPG,MTX3,YME1L1,MMRN2,LALBA,MGLL,TRAFD1,HSPB11,PABPC…
0.000516403780385442	PRPF6,PNN,SNW1,CDC73,SRRM2,RTF1,RBM25,CHD4,CUL4B,MYL6,PSMC1	PRPF6,PNN,MEPCE,SNW1,ZNF598,ARID1A,SMC1A,SRFBP1,CDC73,SRRM2,KDM2A,RTF1,POLR2A,CSTF2,DPYSL2,UTP15,ZNF687,TMOD1,EIF3C,TLE1,ZFYVE21,ROCK1,THRAP3,ZNF24,TTR,SMC3,SETD2,SAP130,RBM25,CHD4,KDM6A,SP1,PLTP,PDS5A,ACTB,ZC3HAV1,JPT2,SH3BGRL2,NCOA5,SLTM,CUL4B,HPX,REXO2,WDR46,RBM6,KDM4A,ELOC,ZZEF1,SNX17,DCLK1,ACOT9,MSRA,CNOT3,DDA1,USP48,PTX3,MYCBP,SERPINA7,SMN1,STRADA,RXRB,GNB4,PRRC2C,VWF,RPS6,INTS12,SCGN,TP53R…
0.00646076915386994	ACIN1,NDUFA7,SFPQ,PPIL1,PNN,ZC3H18,PES1,PPIE,EEF1D	EIF4B,ZFP91,SLTM,BOD1L1,NFX1,PRRC2C,RBBP6,ACIN1,RBM6,CHMP2B,CHMP4B,PCNP,GATAD2B,COMMD10,NDUFA7,ZC3H13,POLR2E,USP36,SP3,SFPQ,COPE,SAP18,PPIL1,RPS26,TCOF1,SMAD5,FNBP4,SCAF8,ATXN2L,KIAA1143,RANBP9,GPX1,SMC1A,PNN,FAM192A,ZHX2,ZC3H14,RPL22,CNBP,ZBTB14,ZC3H4,BRD4,ZC3H18,MMP19,EIF4EBP1,DAZAP1,RPE,SAP130,BRPF1,RABGAP1L,BPIFB1,BLOC1S5,SRRT,RBM33,ARGLU1,MAEA,CCDC86,TUBA1C,PRRC2B,SAR1A,MINK1,PHF3,GPATCH8,RP…
0.000125793800241188	SON,RBMX,PPIL1,SNRPD2,PRPF6,SART1,DDX3X,PNN,SRRM2,SF3B2,HNRNPA3,SRSF5	SON,LSG1,EIF4G1,ELOC,TIMM29,AKAP13,KIF5B,RBMX,UTP6,PPAT,PPIL1,YTHDF3,IGFBP4,SRP68,SNRPD2,GNAQ,SERPINA6,PRPF6,CCAR1,ERAP2,GGT5,SART1,DDX3X,NEK7,ESRP2,XPA,WASF2,DCLK1,GPR107,PLRG1,MAP1B,INTS1,PPP3CA,KIAA0368,MAD1L1,SRSF7,PCLAF,CHERP,CLEC3A,CLIC6,PVALB,TOMM5,NBN,PGM5,AGT,PSMD3,EIF3C,NOL7,CDK11B,PNN,CCM2,SRRM2,FUT11,NMNAT3,YTHDF1,GTF3C1,PPA2,SF3B2,MAIP1,WDR46,CAMK1,VPS16,NDUFA4,HEATR5B,COPS7B,HNRNPA3…
0.00646076915386994	PNN,ZC3H18,PPIL1,YBX1,RPS5,RPS19,ISY1,GTF3C6,HSPD1	SLTM,ZFP91,ZNF787,PRRC2C,TCOF1,PNN,GATAD2B,EIF4B,PCNP,INTS12,SMC1A,ACTB,RBBP6,PCBP1,GPATCH8,SUMO3,RBM6,ZC3H18,RPL35A,ZC3H13,MAZ,BOD1L1,CCDC9,SRRT,YLPM1,PPIL1,THRAP3,YBX1,SRSF3,ARGLU1,SERBP1,CAPZA2,RAB8A,ATP5E,SRSF7,SLC16A3,EIF3A,CHMP1A,CHCHD3,CIR1,SAR1B,ACTBL2,RPS5,FAM76B,SUMO1,PRKAB1,TRIP10,S100A16,RETN,GET4,SNX2,NFX1,RPS19,USP11,CLPP,MED22,SAP30,ARL1,MARCKS,HGS,ARMT1,YTHDC1,SMAD5,RRAGC,RPA3,FDX…
1.06927251233508e-06	YBX1,PRPF6,SNRNP70,ZC3H18,PNN,PPIL1,LUC7L2,SART1,TJP2,SNW1,CHD4,RPS19,ELAVL1,SNRPB2,CD2BP2	YBX1,MARK2,SAFB,PRPF6,BCLAF1,SNRNP70,PRRC2C,GATAD2A,PNISR,PDAP1,EIF3A,ZC3H18,ARGLU1,PNN,TPR,PPIL1,NUCKS1,EIF3C,ZBTB8OS,DCLK1,RPS15A,CUTC,LUC7L2,WTAP,MFAP4,PRRC2A,SERBP1,RBM14,VPS39,SUMO1,RBBP6,ZFP91,RTFDC1,RBM26,NHLRC3,SART1,TJP2,SNX3,NPEPL1,HMGB1,TRMT1,SNAP23,NUP93,EMG1,EIF1AX,C6orf132,DIABLO,WAPL,POLR2J,SNW1,CDC16,MTUS1,KLF16,S100A4,RAPGEF6,DIS3L2,PTGDS,GSN,RPL27A,FCHO2,THBS4,TRAPPC12,CHD4,CXCL…
0.00646076915386994	PNN,RBMX,RTF1,PPIL1,SNRNP70,SFPQ,SRRM2,EEF1A1,YBX1	SLTM,RBM14,PNN,CDKN2AIP,GATAD2A,GATAD2B,SUMO3,PHF5A,ZFAND6,UBQLN2,ZFP91,RBMX,VEZF1,RTF1,ZFP36L1,PCNP,BOD1L1,COMMD3,PPP1R12C,RPL35A,THRAP3,PPIL1,SNRNP70,SRRT,UQCRQ,MAEA,TCOF1,UBL5,ACTA1,EIF4B,SRFBP1,NUTF2,NUBP1,RPS21,NAP1L1,MARK3,SFPQ,CCDC86,TUBB,RPS15A,SAFB,RPS10,SRRM2,EDF1,GRN,OSBP,MARK2,ADRM1,LUC7L3,IK,ELOC,CHCHD3,RBM12B,CLTA,SWAP70,RBM22,PPP1R11,SPTAN1,ZNF516,RPL30,BIRC2,SERPING1,SRSF6,GNA11,C…
0.00124889768541988	PPIE,PRPF19,PNISR,U2AF2,IK,THRAP3	TPRKB,NOTCH2,ENOPH1,TAMM41,YRDC,PPP1R11,CLUAP1,RABGAP1L,LIPA,ATPAF1,CREB1,CPSF2,RREB1,MRPL33,MED21,TG,PARS2,C5orf24,ATP6V1B2,CTSD,BCLAF1,UBE2L3,TBCA,FKBP1A,MRPL23,SH3PXD2A,DNAJA3,UBE2L6,DCTN4,NAPRT,GDI2,UBAP1,PPIE,UEVLD,COMMD3-BMI1,PRPF19,PPP1R12C,WBP11,NOL3,NAA50,AP5B1,CDA,PLCB4,EIF1,PTBP1,NOL8,PNISR,FBXO22,C19orf47,NME2,RPL35A,TELO2,RRP15,TUBB,CAV1,POLR2C,SMG9,TRADD,RPS16,XRCC1,ALDH7A1,ERCC6,U2…
0.000188267261926284	SRSF3,VCP,IK,RBM39,THRAP3,ZNF592,PIN1	SRSF3,SUMO3,STAM,SMC1A,DDB1,PPCDC,TBCA,NUP43,CLTB,SMAD5,VCP,SETD2,UBL5,GATAD2B,ZNF24,PPP1R12C,NDUFA11,HPCAL1,CCDC9,FAM76B,ADO,SARNP,SCAF8,COMMD3,BUD13,RCOR1,AZI2,VEZF1,RPS26,EIF4B,UQCR11,SZRD1,ZC3H14,IK,HDDC3,ARID1A,SDE2,HAUS3,TXLNA,NFYA,NFATC2IP,HSPA8,MED21,HSPB11,SFPQ,NFX1,RACK1,NACA,RBM6,PSMA2,PPP4C,UBA1,ZFP91,ISY1,LBH,ZMYND11,MFAP1,ERF,ATF1,PTMA,MED22,RBM39,THRAP3,CSNK2B,PAFAH1B3,CMC4,HDGFL2,…
0.00699622853986863	SRSF3,SAP18,ZRANB2,TPR,ARGLU1	HMGN2,DAP,USP36,NDUFA11,UFC1,C1orf174,SAR1A,DNAJC7,BASP1,SRSF3,C19orf47,EDF1,HDGFL2,DNAJC8,ELP1,THOC7,POLR3K,BLOC1S5,DNAJB12,SZRD1,SMAD2,DNAJA4,RALA,PEX14,SFPQ,MFAP1,SAFB,NFXL1,MRPL30,RBBP6,KLC3,ROMO1,MRPL19,ZC3H18,ADH1B,SAP18,PNPLA2,GABARAP,PPIL1,ZRANB2,TFCP2,LAMA2,PDLIM5,KDM1B,CCDC91,HAT1,NSRP1,TMX1,GBF1,RBM6,STRIP1,BCLAF1,EMSY,DDA1,PHKG2,WDR33,SPINT2,CSTF2,UCHL5,PRR12,DEF6,MAP4,SEPHS2,FGGY,PCN…
0.00078519095632609	COPE,SRSF3,PPIE,HNRNPDL,CUL4B,SRSF7,NFX1,KHDRBS1	MAEA,SUMO3,ZFP91,ZFP36L1,TBCA,MRPS18A,HGS,NDUFA7,CLTB,PRRC2C,MARCKS,PTBP1,TMEM263,HDDC3,RBM6,RPS19,SRFBP1,NOL8,SETD2,PPP1R12C,RPS11,MARK2,SMAD5,BLOC1S5,COPE,TMEM106B,ZC3H13,ATXN2L,PHF5A,SRSF3,CCDC9,SAR1A,PPIE,RBCK1,RPL28,GPATCH8,TANC1,RBM26,RPL35A,RAE1,CSTF2,WDR33,TBC1D10B,RPS5,EFHD2,SLC16A3,IFT172,CHMP5,DHRS11,SAFB,HNRNPDL,KMT2C,YWHAH,BRPF1,ACTA1,TMED2,NUDT16,DCAF10,LALBA,RPL26,MTFR1,NOP14,FRZB,…
0.00484420023886203	SRSF9,SF3B2,SNRNP70,YBX1,SRPK2	PRPF6,CRISP3,SERPINA7,TF,SF3B5,CNOT9,UTP18,VASN,STRN4,U2SURP,SRSF9,FGB,MED8,PPIL1,ALDH1L1,GC,RBM12B,XAB2,C3,POLR2H,BUD13,SRRM2,PTGDS,SF3B2,WIZ,DDX23,ADNP,ATXN2,LRG1,AMBP,ORM1,BTD,PAK4,LIN37,DPH2,GPLD1,ANK1,SERPINC1,PSPC1,FETUB,POF1B,WDR43,CENPB,PNN,ANAPC7,C8G,PPP4R3A,NDUFA13,SULT1A3,PPIH,NOM1,PLCD1,CP,GSPT1,ITPKB,RRP9,ZMYND11,RRP1,SMARCA5,INSR,ILKAP,GPATCH8,TRMT1,LYVE1,ATAT1,CHAF1A,SNRNP70,MORC3,…
0.00187193209270409	ACIN1,RBM14,SSRP1,SUPT16H,SMARCAD1,RTF1,CHD4	LRG1,RBMX,GATAD2A,RBM10,SMC3,SLC4A1AP,ACIN1,STIP1,RBM14,SSRP1,RBM25,RNF40,ZFR,NAT10,PHF5A,SUPT16H,DCAF1,PGLYRP2,EDC3,SNW1,SART1,C2,TNS1,ZNF598,RPS6KC1,RNF113A,NUP153,RSU1,ZNF638,MORF4L2,MSRA,WBP11,EEF1D,NCOA5,SUPT5H,SIN3A,ORM1,UTP18,SNTA1,CPSF4,RPL12,SON,PLTP,U2SURP,LBH,ORM2,MRPS2,CFL2,ZMYM4,TUBB2A,SMARCC1,SRP9,RBM26,CHERP,HEXB,RRP12,TAF5L,SBSPON,ADNP,ANP32B,HMCES,HOPX,POGZ,TGFBRAP1,DDX3X,STMN1,S…
0.0080329549108168	STAG2,KDM2A,CDC5L	MTX1,TIMM29,CD209,SULT1A3,MCMBP,YTHDC1,SYNJ1,MED8,IGFBP4,PAPSS1,ZW10,ACSS3,ZEB2,SOD3,SBSPON,RANBP2,CHCHD3,TRAF5,HNRNPD,TMEM33,H2AFY,CMC2,SF3B6,OPA1,DEK,CLIC2,DCLK1,NONO,MAP1B,ALDH1L1,EPS8,PSMF1,PLTP,MCM3,COL14A1,STAG2,MOB1A,CHERP,PAWR,PPA2,TP53RK,SELENBP1,AIFM1,STK38,PABPC4,SNX9,AIMP2,NR2C2,BUD31,DERL1,COA3,CCM2,ECM1,PPIH,SCYL1,CTNNB1,QARS,PSMB6,SLC25A25,ACTR1A,SEC24B,TIMM50,SNX27,HS1BP3,KDM2A,YI…
0.00482025397384366	ILKAP,BTK,GLUD1,INSR	CANT1,SYF2,CARTPT,DAG1,PIP,ARHGEF1,SUMO1,PABPC4,ERP29,WDR92,NUP93,ILKAP,TGFB1I1,DEPTOR,DNAJC7,ARHGAP15,PCK2,HIST2H2AB,ARFGEF3,GALNT7,MOB1A,TAOK3,BTK,DTYMK,NOL3,SUFU,QSOX1,TRAPPC8,LUC7L2,GLUD1,RPL27A,USP47,ABRACL,NCOA5,TPRG1L,NUP210,SMCHD1,ACADSB,PEAK1,NIN,UBAP2,ZNF668,ANXA9,TRMT1,NHP2,RPL18A,EIF3C,ECM1,WASF2,BUD31,SBSPON,AHNAK2,PSMB8,IL6ST,SPOUT1,TUBB2A,TFAP2A,GPATCH4,RPL10A,MPP7,YARS,FCER1G,PSMD…
0.00403901308717691	HNRNPDL,HSPE1,STIP1,TPR,PIH1D1,GRPEL1,RIPK3	RPL32,MRPS18A,RPS26,RPS29,PTBP1,RPS11,RPL29,EIF3A,ASNA1,SARNP,PRRC2C,HNRNPDL,NOL8,MARK2,SRFBP1,ZNF787,RPS20,UBL5,PNN,EIF3C,RNF113A,FCER1G,MAEA,TPRKB,PSMD9,ARF3,SAR1A,CCDC93,PCNP,SNRNP70,NAP1L1,PEX5,SERBP1,INTS12,ATXN2L,DDX3X,SCAF11,TTC28,RPS18,TMEM189-UBE2V1,HSPE1,PHYHD1,CKS2,SUMO2,METTL1,GTF2F1,LYAR,STIP1,MFN1,CHCHD3,RPS21,PRDX4,VPS8,SLC25A5,ARMT1,PITRM1,COA6,AGO1,COX6C,AKAP17A,WDR24,NDUFA7,CSN2…
0.00482025397384366	CASP3,XPO1,ABL1,ELAVL1	YBX1,TRAPPC11,PLVAP,RPL18,POLR1C,CASP3,RBM26,AFG1L,MAP4,GNG5,PTBP1,ABRACL,RPS29,MRPL42,RAN,GRN,IGFBP6,NPTN,RPL35A,ITGB1,RABEP2,XPO1,GALK1,RPS15A,TPRG1L,RAP1A,ZYG11B,NDUFS6,HSPA13,SURF6,PCBP2,AP5B1,BRPF1,WDR33,NFATC2IP,MEA1,TNPO1,TFCP2,DNAJB12,HAUS1,NPRL3,RPS20,CCT6A,AKR1C3,ORC4,STEAP4,RPL23A,FAM107B,UBE2N,GNB2,NOP14,NPM3,CHMP2B,CPSF2,LRPAP1,SIPA1L1,FBXW8,UBE2K,CPNE3,ZNF148,APOM,COMMD3,SAR1A,C17or…
0.00733784765958348	SNAP29,FGFR1OP2,GOLGA2,TRIM25	NAB2,USP3,ANXA3,SEMA3C,DAP,ACBD3,HECTD3,UGGT1,FCGR3A,PCNT,OTULIN,SNAP29,NKAP,PRPF6,VPS51,EIF4G2,CALR,STEAP4,INTS13,ADNP,AUH,SPDEF,FAM111B,BOLA1,CDKN2C,TRAPPC6B,FPGT,PHGDH,DNMBP,IFIT3,URGCP,CCDC88C,RUFY1,ARHGEF16,CBX4,DYNC2H1,PARP9,NT5C2,CRMP1,FUK,C1orf52,MTCH1,HAUS2,CDC42EP5,MPI,SRP54,SRSF5,TYW5,FGFR1OP2,LOC107984056,RBM26,FKBP11,RAP1B,LEMD2,ABHD14B,FIG4,FNBP1L,WARS2,PHKA1,CLPX,GSS,BCL7B,EPB41L5,…
0.000547420539397758	MAGT1,MLEC,RPN1,AUP1	ZFP91,GATAD2B,PNN,MARCKS,SETD2,SUMO3,BCAP31,ISY1,PCNP,THRAP3,CWC22,SRFBP1,SDE2,BOD1L1,SEC61A1,ATRX,SRRT,GID8,PPA1,TDRD3,RBM14,SLTM,ZC3H13,PPP1R12C,PRRC2C,SETX,ZC3H4,HDDC3,COMMD10,ZC3H18,EIF5A,RPS26,STT3A,ZNF24,DBNL,RSRC2,ELOA,CCDC86,ACTBL2,FAM192A,TCOF1,MAGT1,IGF2R,SPCS2,PCYT1A,PTDSS1,MLEC,MLYCD,TOMM5,VTI1A,RPE,SNX12,SUDS3,TMEM214,HDAC6,ZNF451,EMC4,ATP9A,DFNA5,FILIP1L,IRF6,TBC1D17,LRRC1,OXA1L,MMP…
0.00296090371111185	GOSR2,RAB5A,STX4,VTI1B	SUMO3,GATAD2B,ARF4,RBMX,USF2,PNN,EIF3M,CLTB,RSRC2,PHF5A,PTBP1,PPCDC,RPS19,POLR2L,TBCA,RACK1,SETD2,MARCKS,NFYA,FCER1G,NDUFA7,COMMD10,NUTF2,MRPS18A,HDDC3,UBA1,SRFBP1,LSM5,EIF3A,PSMA5,RAB8A,TMEM109,CCDC88C,GOSR2,VAPA,PRR14,UBL7,TRAPPC4,RAB5A,HGS,LYSMD1,SON,HDAC6,STX4,RPL29,RHOA,API5,CHMP1A,KARS,NDUFV3,ATP1A1,SLC39A7,RPS6KA4,WNK1,CCDC86,XRCC6,RABL2B,MVB12A,SEC62,THEM6,WDR24,ZDHHC5,DCAF7,VTI1B,ATAD1,E…
0.000789721831967183	SARNP,STX7,UBL4A,RAB1A,NAPG,SYNPO2	SUMO3,RPS11,PHF5A,MARCKS,RBMX,RBM26,HGS,EIF4EBP1,PCNP,ATXN2L,NUBP1,RBM14,MRPS18A,UBL5,PPCDC,RPS26,CIZ1,MARK2,IK,LALBA,TBCA,CLTB,SMAD5,ZFP91,RBBP6,SZRD1,GATAD2A,UBQLN1,RPS18,ACTA1,MAEA,UBQLN2,SRSF3,ZFAND6,RPL29,SAP30L,DDB1,LACTB2,RPS15A,SARNP,CREB1,RAB8A,STX7,GCC1,OXNAD1,PTAR1,PPA2,C1orf116,SMAP1,MRRF,BPIFB1,SH3BGRL2,MRPS15,PCYT1A,CNOT7,GMEB2,PLTP,UBL4A,DTX2,UTP18,PCBD2,GDI1,FAM20B,PADI4,SASH1,HEX…
0.00854121907456476	STXBP5,STX12	PAK2,PKN1,PHKA1,CNN2,COMMD2,GEMIN4,RIPOR1,EPS8L1,RSBN1L,COL11A1,FHL3,GIT2,PIKFYVE,MED27,NXT1,PIP4K2C,USP47,RHOG,DIEXF,NSUN5,NCOA7,LRRC15,NSUN2,CAPZB,TLN1,MGP,TTC1,STXBP5,ARHGAP27,HSD17B11,GRAP2,PTGS1,HIP1R,ERBIN,FBXO18,DNAL1,SDR39U1,STX12,H3F3A,UBA1,YBX2,PHKB,MRPL3,RAI14,SLC25A36,FAM20B,RIOK1,ERCC6,TMEM189-UBE2V1,TBC1D2B,BIRC6,RAB31,GSN,MFAP2,HS1BP3,TTN,C11orf84,NECTIN4,SH3GL1,DOCK6,MEPCE,PLIN3,A…
0.0068687717844557	RAB5C,RBM10,DUSP23,CTR9	SETDB1,ZNF638,ACSS3,ATL2,NUP153,SMNDC1,TRAPPC2,IBA57,CNBP,RREB1,DOK1,NHLRC3,TRIM24,MCC,ANKS1A,GATAD2A,SON,TJP2,MIB1,ERCC5,TG,CYLD,BRD2,ZC3HAV1,DDX46,POLR3B,CUL1,NFX1,MFAP4,SNX21,RTFDC1,RAB5C,UBAP2,EPS8,NDUFA10,PNO1,CSTF2,FTO,OTUD4,LSM3,EHMT1,CGN,RBM33,NDUFA1,TST,PRR12,TRIM56,RDH13,PPP2R5B,SF3B2,IRX5,AMPD2,IVNS1ABP,HMGB1,KIAA0907,LYVE1,MED6,SENP1,REPIN1,TPR,BTN3A3,NCBP2,CMA1,RBM14,TKT,TRNAU1AP,IFT…
0.000403374302152905	SUGP2,EGFR,CHD4,RUVBL2	SUGP2,CNOT3,SMARCA4,HNRNPM,YTHDC1,ALDH1L1,POLR2J,ILKAP,ANXA1,CDK6,DIDO1,NID1,PNN,ADNP,PLA2G4A,LIG3,MMP9,GPATCH8,SON,CUL4B,ZNF598,ARFGEF1,HMGN2,DNAJB4,MYL6,CREBBP,AIDA,ZNF609,TMOD1,DAG1,CENPC,SRSF4,SMARCE1,SAFB,WDR33,APOC3,LUC7L3,NCOA5,MAX,S100A4,RBM33,NCBP3,RBM25,SNRPD2,CTDP1,CUTC,GALT,BOD1,BOD1L1,SESTD1,ATXN2,LRBA,NUP210,MBD1,GOPC,MRPS16,PPFIBP1,RAP2B,DDX23,CCDC186,YWHAQ,MORC3,HNRNPA0,TIMM29,SMG…
0.00248070136350948	DNMT1,UHRF1,PRIM2,KIF11,ZCCHC17,RARA	ORM1,SMG8,KDM4A,DNMT1,NCAPH,MAD2L1,NCAPG,PRELP,FGF2,SERPINA3,AGT,NAA15,BCAR3,ITGA7,MCM6,AKAP12,AKAP8,ANKRD17,PGLYRP2,C1orf35,MSH6,UBE2T,NAA10,MRTO4,NKRF,TONSL,UHRF1,RBP7,PRIM2,SMC4,DDAH2,CUL1,F2,APOH,WDHD1,RIF1,TIMMDC1,UBE2C,HPX,RFC2,NLE1,FXR1,EBNA1BP2,ME3,TOP1,BTD,HDGFL3,TOP2A,MYH11,GNL2,RBM25,SAFB,EIF4G1,PDS5A,SYF2,NOP16,NRP1,PCLAF,CRYL1,TTC39C,NISCH,KIF11,ZCCHC17,OCRL,GPX3,MFAP4,IARS2,PLIN1,PR…
3.54373233814979e-05	SF3B1,PLRG1,SF3B2,CHD4,RANBP2,U2AF1,XAB2,PDS5A,THOC2,PHF5A,SRSF9,SMARCA4,SNRNP70,KPNB1,SRSF7,ZNF326,SUZ12,ELAVL1	PRPF6,TTR,SF3B1,PLRG1,AGT,SF3B2,CHD4,NONO,PGLYRP2,RANBP2,U2AF1,STIP1,ELL,THOC1,XAB2,PDS5A,SMCHD1,THOC2,ACTA1,SLIRP,ZC3HAV1,DARS,EMC4,API5,SLC4A1AP,NSMAF,CDH5,ABCF1,DRAP1,TOP1,SMIM12,MCMBP,ZNF598,CLSTN2,PRDX6,RNF40,SRP68,GMFB,NASP,AIMP2,MEPCE,PHF5A,SRSF9,WDR33,CHMP1A,OSBPL11,EIF4G1,PPP1R2,SMARCA4,SNRNP70,KIF2A,ELOC,HUWE1,SCGB1D2,SAP30,SVEP1,AKAP8,SOGA1,GTF3C2,INTS5,MICU1,KPNB1,LRPAP1,HPX,PHF6,MOB1…
0.00809622933234394	GLIPR2,LMNB2,CD14,NR3C1,VCL	CCDC50,CCDC102A,EFEMP2,UBE2V2,ITGB1,MSN,ENTPD1,EPB41L2,HSPA9,PPM1F,MFAP2,RSBN1L,NDUFAB1,FH,CDC42,MSRB3,KANK2,SWAP70,SNX2,CPEB4,POGLUT1,HIST2H2AB,RASAL2,EML3,FGF2,PLEKHF1,WDR24,HECTD1,OSBPL9,WIPF1,C1QC,GLIPR2,SUPT4H1,NDE1,YIPF5,CPB1,ENG,PALM2-AKAP2,CTHRC1,DNAJA3,MED23,FAM114A1,FHL1,FXN,MRPL37,LMNB2,H6PD,AP2B1,STX7,PDLIM2,PGP,MAPRE3,CNN2,FBLIM1,TBC1D2B,MYLK,GAS7,SYBU,TCP1,MAP4K5,RHOB,CDK5RAP1,RAB23…
0.00809622933234394	GLIPR2,LMNB2,CD14,NR3C1,VCL	CCDC50,CCDC102A,EFEMP2,UBE2V2,ITGB1,MSN,ENTPD1,EPB41L2,HSPA9,PPM1F,MFAP2,RSBN1L,NDUFAB1,FH,CDC42,MSRB3,KANK2,SWAP70,SNX2,CPEB4,POGLUT1,HIST2H2AB,RASAL2,EML3,FGF2,PLEKHF1,WDR24,HECTD1,OSBPL9,WIPF1,C1QC,GLIPR2,SUPT4H1,NDE1,YIPF5,CPB1,ENG,PALM2-AKAP2,CTHRC1,DNAJA3,MED23,FAM114A1,FHL1,FXN,MRPL37,LMNB2,H6PD,AP2B1,STX7,PDLIM2,PGP,MAPRE3,CNN2,FBLIM1,TBC1D2B,MYLK,GAS7,SYBU,TCP1,MAP4K5,RHOB,CDK5RAP1,RAB23…
0.00727692874448481	EMD,EZH2,SUZ12	GATAD2B,PNN,ATXN2L,RPS26,SRSF3,CLTB,RBM6,RPS18,MAEA,RPS11,TBCA,HDDC3,NDUFA7,SRFBP1,MARK2,ZFP91,MRPS18A,INTS12,SUMO3,SRRT,ISY1,SMAD5,COX17,SMC1A,ARID1A,PTBP1,RPLP1,CHMP1A,TPRKB,SPCS3,FCER1G,PRKAB1,MAP7D1,NFX1,EMD,IDNK,MKI67,ANKLE2,ATP5B,RBL2,C19orf70,SETX,MYBBP1A,ATP5D,RHOA,ITIH3,RPL32,RPL35A,WNK1,UNC13D,NUBP2,ATP1A1,PCNP,FBXL15,EFEMP1,SMARCB1,UTRN,PPAN,ZNF385A,CSNK1A1,GALNS,FTSJ3,GPRIN3,PRPF19,EZ…
0.000904288915023983	HMGB2,PPP1R9B,LUZP1,FLNA,CLTB,PPP1R18,JUP,TPM1	ATRX,SMC1A,NUDT19,BPI,AZI2,SNW1,ATP5D,COMT,TNK2,POT1,APOD,MAP4,HMGB2,GDI2,PPP1R9B,ANKLE2,LUZP1,NADK2,MIER1,GFM2,KIAA1217,G3BP1,FLNA,SARNP,PDK1,PRKAB1,DOHH,CLTB,ARPIN,TUBA1C,ZFP36L1,MFAP2,ARID1A,NDUFS2,SCGN,MRPS10,KLHL11,ATP5B,ELANE,FCER1G,SEC24D,CCDC93,COL11A1,COQ6,CARTPT,CAMP,ZRSR2,ARCN1,PPP1R18,PPP2R5B,FAM172A,RBM22,ARL1,PRIM1,OPTN,KIAA1671,ANTXR1,CST3,FARP2,PRKAR2B,TTF2,BTF3,ANAPC2,MAP4K2,C1or…
0.000904288915023983	SYNPO,CAPZB,TPM2,TPM1,DAPK3,NEXN,ARPC5,AP2A1	SYNPO,CPB1,CAPZB,LOXL1,WDR24,TPM2,UBE2V2,TPM1,GLIPR2,AMPD2,ILK,PPM1F,KCTD12,KCMF1,FHL3,COPZ2,DAPK3,POLR2F,PDLIM2,FAM96A,EFEMP2,CDH11,PDIA5,CSRP2,SNX29,COL11A1,CPEB2,NEXN,PRKAB2,LRRC15,GOSR2,ST5,ATP6V1G1,FERMT2,ALDH1L2,RARRES2,SMAP2,RBM47,RNF7,PHC2,SNX18,ARPC5,PLOD1,TBC1D9,EFEMP1,FBLIM1,PRPSAP1,VIM,PML,CELF1,AP2A1,SNRPE,SEPT2,TTC9C,CRTAP,TRAF6,LSP1,PLEKHF1,NFKBIE,GMPR,CTIF,CARTPT,FPGS,PUM1,RASA3,E…
0.000177958916634689	SYNPO,AP2A1,TPM1,AP2M1,CAPZB,DAB2,RAI14,TPM2,NEXN	SYNPO,AP2A1,PDLIM2,EFEMP2,MSRB3,SEC23A,STAT6,SNRPE,TRIP10,CSRP2,RARRES2,MRPL24,TPM1,EPB41L2,GLIPR2,FOXK1,TLN1,PTPN12,AMPD2,AP2M1,NRBP1,MED30,FTL,NKAP,MDN1,SEPT7,KANK2,CAPZB,EMILIN1,PUDP,PKN1,THBS3,SNX18,MED23,ZRSR2,ROCK2,DAB2,MYLK,DENR,RAI14,KDELC1,SPAG1,CARTPT,ATG12,FBXW2,FRMD8,PLEKHF1,BLOC1S6,FBLIM1,LSP1,YTHDF2,FSCN1,RARS,RHOA,MAP4,OCLN,GTF2H4,UBE2V2,TUBB6,DNTTIP1,FARP2,SOWAHC,ARHGAP5,BYSL,MTMR…
0.000904288915023983	SYNPO,TPM2,TPM1,CAPZB,GNAI3,PPP1R18,PPP1R12B,DAB2	PDLIM2,PRPF4,RAB3D,TRIP10,SYNPO,MSRB3,EPB41L2,EEA1,STK10,FSTL1,CSRP2,PLRG1,RPS19,COL2A1,SNX2,SUMO2,SEPT7,ATG12,TPM2,TMSB4X,WIPF1,CELF2,LRP1,ZHX3,FBLIM1,SETDB1,ADGRL2,ADAP1,GSTO1,TPM1,POLR2I,ASAP2,CAPZB,MAPK13,GNAI3,TRAPPC12,DIEXF,GIT2,MAP4,MAP4K3,FOXK1,GOLGA3,SEPHS1,ARPP19,FAM120C,LIMS1,CUL2,FOXP4,IKBIP,OTULIN,AK3,APOA4,YWHAH,KIAA1324,THYN1,MVB12A,EFHD2,COMMD6,NAA15,DIAPH2,ASPN,RDH13,PPP1R18,ARHG…
0.00541509731314145	RAB8A,SYTL1	GATAD2B,RBM6,LBH,SNRPE,GATAD2A,HDGFL2,MAZ,CHMP4B,VCAM1,ATXN2L,SERPINI1,BCLAF1,SRSF3,TOR1A,PPIL1,SRFBP1,CHMP2B,DAP,ZC3H13,SP3,CHCHD3,DDA1,CNBP,ACTBL2,ARGLU1,HMGN2,PTMA,POLR2E,EIF3A,ITGA7,CLTB,GABPB1,KIAA1143,NHEJ1,PSMG4,GABARAP,MARCKS,RBM14,YRDC,MARK2,MRPS18A,CRIPT,CHMP1A,SLTM,C19orf53,SETD2,RPL28,RPE,DNAJC8,TPR,RPL31,ZFP36L1,SUMO3,SCO2,SAR1A,GLRX2,EIF2S3,DBNL,WDR33,SERBP1,PDAP1,POTEF,SMC1A,RPS19,…
0.00541509731314145	RAB27B,SYTL2	SARNP,EIF3C,RPS11,MARK2,GATAD2B,RAB27B,PNN,MAP4,SON,HNRNPDL,CHMP4B,GALNT7,ARCN1,RPL35A,RPS29,PPIL1,ASNA1,HDDC3,NDUFA7,CCDC93,TUBA1C,SZRD1,PYM1,RBBP6,PAK1,CLCC1,UBE2A,RPSA,PPP1R11,EIF1,EIF1B,PSMB3,BCLAF1,MRPS10,PYCARD,BPIFB1,RACK1,NOL8,TPRKB,EIF4A2,COL16A1,STK10,NCBP3,LALBA,UQCR11,ZFP36L1,PRDX2,ABCF1,PROM1,BET1L,TC2N,BCAP31,RBPMS,SNRPD1,SYTL2,YIPF3,LSM3,VAPA,XPNPEP1,COG2,PELP1,GGA3,SNRPD3,IFIT2,MD…
0.00541509731314145	SYTL2,RAB27B	ZNF787,SYTL2,SLU7,RPS26,RPSA,HNRNPDL,PTBP1,RABGAP1L,HGS,TCOF1,BOD1L1,SMC1A,UBAP1,UBQLN1,GATAD2B,RPS11,CLTB,CDKN2AIP,SNRPE,PPP1R11,TACC1,EIF3A,RACK1,NUTF2,ATP5B,PPIL1,NDUFA11,ELOA,RCHY1,HDDC3,PCNP,TBCA,PCBP1,ARL6IP1,PNN,LBH,MARCKS,ZNF24,RPS29,PYM1,RPLP1,SP1,TUBA1C,SH3PXD2A,GDI2,PPIE,BASP1,LALBA,RPLP0,NFATC2IP,SARNP,RAB27B,DNAJC12,RBCK1,EFHD2,SH3BP1,RHOC,RPS3,SAFB2,ARHGEF2,ATP8B1,DACH1,BPGM,POLR1C,…
0.00642000639505257	TACC3,PLEKHO2,KIF11,CKAP5	NAT1,TACC3,NOSTRIN,SH3BP1,MRPL43,ECT2,RFC4,SRSF9,LPXN,NSL1,CSK,HMCES,PLEKHO2,NSMCE2,SERPINB9,UCK2,CDK1,KIF11,HPX,CHERP,RMDN3,IRS2,UBE2O,HK3,ARFGAP3,WARS,AHSG,ATG3,TTC4,SFXN5,ME2,ABI1,DBNL,PLIN4,RANGAP1,CCDC102A,RPL5,POLR2B,IRS1,TIA1,NSA2,MCM3,CAVIN2,SUPT5H,AUH,AMPD3,SND1,HRG,PHKB,DYNC2H1,SHMT2,MCM2,CKAP5,UTP6,SHPK,RANBP2,PCNA,MALT1,CDC42BPB,ERP29,AAMP,BRK1,PI16,DACH1,LSP1,RETSAT,ATG5,EZH2,CELF2,R…
0.00716691555633464	PTBP1,RBMX,ZFR,EIF3A,PABPN1,HNRNPDL,U2AF2,ZC3HAV1,GNB2,MTDH,BCLAF1	ZNF460,PPIE,SAR1A,RPS26,RBMXL1,DPH5,ZFP91,RIPK2,PDXP,SLTM,YLPM1,ZNF668,NFX1,NFYA,NUDT16,VPS16,STXBP5,UBTF,IK,PTBP1,ZC2HC1A,RBM26,SCAF1,ASNA1,TSC1,CWC25,NCBP3,RBMX,C18orf8,KPTN,EIF4B,FCER1G,HCFC2,EVI5,REXO4,SARNP,GNS,SRFBP1,DDX1,TUBG1,ZFR,ZNF687,USF2,TTF2,NDUFA11,NDUFS6,TXLNA,RANBP9,RRP8,PCNP,SETD2,EIF3A,ATP6V0A2,GCSH,PABPN1,MAP3K7,HGS,CENPB,MAEA,RBM33,TBCA,ARL2,POLR2E,ECHDC1,HNRNPDL,PPIL1,MINDY3,…
0.0027516520270888	DERL1,RPS2,TCF25	RANBP2,EIF5B,EIF3C,WASF2,NUP85,CYFIP1,PML,TOP1,UBR4,NUP93,HUWE1,NSDHL,CNOT2,TMEM33,DERL1,STIP1,RRP1,NQO1,CFAP20,GMPPB,ZC3HAV1,MANF,INTS2,CSNK2A2,EIF4G2,PPM1G,DPY30,ARL6,RPS2,BZW2,PHF6,HINT1,EIF2B2,INTS1,NAA15,LARP7,EIF3E,ACSL3,HECTD1,CHAD,MBLAC2,FCER1G,EIF2B5,LPIN3,KCMF1,SEC14L2,URGCP,NAT10,NPC1,ABCF1,REEP4,ENTPD5,BPIFB1,ANKS1A,SF3B2,MAN1A1,GPD1,XPA,SRP14,NUP188,UBE2V2,ERP29,CKAP5,RAC1,MARCKSL1,L…
0.0050999943643306	SLC16A3,CHMP2B,HMGB3,WDFY3,RIF1,RPAP1	CCDC50,CBX4,PPIE,TBPL1,CSAD,NAXE,GTF2B,RUFY1,DFNA5,YLPM1,CXXC1,COL16A1,NUP188,GOSR1,RAD21,SLC4A1,TUBA1C,HNRNPUL2,PHKG2,SUMO2,GRPEL1,MAP4,SLC25A11,EHMT1,MPDZ,TMEM11,ZC3H18,NSRP1,S100A12,CFL2,SLC16A3,NOP56,CUEDC1,CHMP2B,ADK,BID,GHDC,HMGB3,WWP2,SAR1A,TXNRD3,YBEY,SCOC,PIH1D1,ARF3,TRUB1,GP2,ARL15,MYL6,HSBP1,CCT4,TTLL12,HNRNPUL1,BOLA1,DCAF11,QTRT2,SBF2,WDFY3,MBL2,UFSP2,ATP2A2,TNPO1,RIF1,TPM3,PPP4C,EHD3…
0.00102961348793771	NASP,ANXA5,HMGB1,GAMT,PACSIN2,DNMT3A,PPM1G	LBP,BTD,TANGO2,EIF4G1,LARP4B,ORM1,LRG1,LIG1,PES1,SELENBP1,SERPING1,KIF11,FETUB,MDC1,CP,HYI,SERPINA1,ME3,SLC4A1AP,NASP,AZGP1,SF3B5,ORM2,CFB,F12,ANXA5,PRPF6,KDM2A,GNPDA2,UTP18,ACO1,PLCD1,RANBP1,TOLLIP,CYB5R1,NAA15,PTGR1,ZNF598,DIEXF,UBAP2L,DNAJA1,UHRF1,SERPINA7,MYCBP,POLD3,CSAD,TRIM25,GPT,SULT1A3,HSPA12A,MKI67,SNX5,HRG,CHD4,MORF4L1,FBXW2,A1BG,CUL5,TONSL,PON1,ARFGEF3,HPX,MCM3,RAB30,POLR2H,CRYL1,WWP1…
0.00854121907456476	TFAP2C,EZH2	GATAD2B,SMC1A,ZFP91,SRSF3,PRRC2C,TFAP2C,PNN,SUMO3,MAEA,CLTB,SRRT,RBM6,RPL35A,MARK2,ISY1,SERBP1,NDUFA7,RPS18,PTBP1,BUD13,TCOF1,POLR2E,GATAD2A,TMEM263,RPS11,SMAD5,RPS26,ZNF787,ATXN2L,ACIN1,UQCRQ,RBM14,MFAP1,DOK1,FCHO2,NFX1,CTU1,EZH2,NDUFC2,C4B,ZC3H14,CNBP,GLG1,MMRN2,RTFDC1,RPL18,STAT6,VCL,PGLYRP2,YTHDF1,NMNAT1,MAP7D1,HDAC2,MYH14,PTPN11,STX6,GLUD1,F10,NUDT18,CHMP5,BPTF,GCC1,F2,PARP4,KANSL2,PRDX2,NHS…
0.00600547056938612	BPTF,HMGB3,SMARCE1,RAN,GNB4	TIMM29,CCDC174,AKAP8,XAB2,POLR2E,NOL7,SAP30,TP53RK,ATP6V1H,ELOA,MPHOSPH10,FOXJ3,CHD4,SENP1,ISY1,RRP9,TWISTNB,RBM17,PQBP1,WDR46,RRP12,TUBB2A,IRF2,CALML3,PLXNB2,POLR2J,XRCC1,PHF20L1,BPTF,ADD3,THOC2,TF,NOP14,RBBP6,MED29,EIF3G,C4B,PRPF8,PTPRJ,SYF2,EBNA1BP2,MUCL1,ELP3,BPIFB1,AIDA,PSMG2,SEPT2,SURF6,MED8,SNX29,FBL,BRD2,DYNC1LI2,AHSG,RNASE1,RAP1A,PSMD9,EIF3C,FBLN1,TTR,BYSL,JCHAIN,CPE,KIAA1143,HSD17B12,C1…
0.00364058289939207	TRIM16,MAPT,PPM1G	ALAD,MEN1,UBR4,DDX52,STK17B,GSTM1,CD93,ACTR6,DPP7,EIF5B,TSFM,CD36,TTR,ABHD4,FBXO6,MYO19,PRRC2C,PAIP2,KCMF1,BRD7,PLTP,MAPK9,RTKN,RPL12,TRIM16,CYFIP1,MARK2,LLGL2,PAK1,MAPT,ADD3,INTS6,SLC35E1,GSTM5,FAHD2A,LDB1,KPTN,MTMR3,RRAGC,CEBPB,NTHL1,CHMP3,SRCIN1,RRP1,TSTD1,RUBCN,USP9X,ARMT1,ANGEL2,TIMM22,PGR,CYFIP2,IPO8,RAPH1,NFS1,AGFG1,MAP3K2,LSM3,MBD3,SPINT2,SELENOW,DBNL,GFM2,MEAF6,PVALB,MED17,SELENBP1,TMED1…
0.00848816781233847	SARNP,THOC7,PPIE,RPS21,ZC3H11A	SRRT,HOOK2,MARCKS,ZNF687,RPS26,RTCA,AP5M1,CHMP2B,SP3,NXT1,SP1,PCNP,TMEM109,DCAF5,SH3PXD2A,SLC16A3,NDUFS6,REPIN1,SARNP,BRWD1,TXLNA,RFLNB,HSPA8,EIF3M,THOC7,RPL28,SRSF3,REEP5,DPH5,COPE,EDF1,UBE2B,RPS15A,ZNF787,PPIE,XAB2,QTRT2,MRPS10,RPS21,MRPS5,CARTPT,RPL18A,PRPF6,MAX,CLIC1,ZNF24,SF3B1,TCEAL3,SAFB,CLTB,RALY,LRPAP1,HNRNPH2,ZC3H11A,PTBP1,CCT6A,TARBP2,CHMP4A,SNX9,GPATCH8,TRIR,HNRNPDL,PSMG3,MARK2,PSMA5,…
0.00128657906138649	PPIL1,POLDIP3,BCLAF1,ZC3H11A,C19orf47	PPIL1,ZHX2,SUMO2,PHF5A,SZRD1,RWDD1,ZFAND3,GATAD2A,ATP6V1B2,ZC3H18,CDC73,DAZAP1,RBM14,POLDIP3,NDUFA5,RPL28,PRPF6,RTCA,RIPK2,ROMO1,TOR1A,CHMP4B,INTS12,RPL34,SRSF7,BUD13,CLTA,WDR45,ILKAP,RPL31,LRPAP1,CHMP1A,SRSF3,RPL29,BCLAF1,ZC3H11A,ELP3,CMC4,RPL18,TBPL1,RBM33,FCER1G,EIF5A,UBE2V2,GLRX2,ZMYM4,RSRC2,KANSL2,SRM,RPS19,CAPG,PSMA4,TOR3A,ZNF24,ARHGAP1,CCT6A,TRMT1L,BLNK,CDKN2AIP,LSM5,LSM12,TIMM9,TSC1,C8orf…
0.00887063198476749	SARNP,ZC3H11A,BCLAF1,THOC7	UBL5,SRSF3,HDDC3,MARK2,RPS29,SARNP,PPP1R11,RPS11,NDUFA7,RPS26,HGS,EIF3A,ISY1,MED21,RBBP6,RPS18,GRN,GID8,ROCK1,TBCA,SMG9,CDKN2AIP,REEP4,TIMM8B,DBNL,MED8,INTS12,SUMO1,ZC3H11A,TMEM11,F11R,SNX21,EIF5B,PNN,TIMM29,SPCS2,AKAP8L,BCAM,ELOA,BICD2,ACBD3,CMC4,DUSP3,NSMCE1,CAPNS1,SH3BGRL2,PHYKPL,TRIP12,BCLAF1,YY1,SP3,RRP1,NSMCE3,CIT,ELAC2,RAD50,ZC3H13,AFG3L2,OXSM,CIR1,ARHGEF5,THOC7,TMX1,AK6,TPR,SPEN,IK,OARD1,…
0.000428103407286148	PNN,RBM14,EZH2,CSNK2A1,SUZ12,BCLAF1,THRAP3,IK	PNN,ZFP91,PCNP,GATAD2B,BOD1L1,INTS12,SMC1A,MARK2,RTF1,SRRT,SUMO3,NDUFA7,RSRC2,RBM14,SUMO1,SLTM,ZNF787,MARK3,SERBP1,HSD17B10,ARID1A,MAEA,SARNP,MED6,CENPB,UBAP1,PRRC2C,MARCKS,EIF4B,SP1,SETD2,RPS11,PPP1R12C,RPL35A,EFHD2,NUDT16,CHCHD6,NOLC1,MAP7D1,YTHDC1,EIF3A,ARGLU1,AHNAK,MBD4,SLC4A7,WDR33,EZH2,C19orf53,SEPT11,APOC1,KIAA1143,MED15,SRCAP,SNAP29,COL1A1,F11,RPS5,TCOF1,CSNK2A1,HSPA13,SUZ12,C19orf70,BCLA…
7.4828806703877e-05	PNN,THRAP3,SFPQ,BCLAF1,SNRNP70,SUZ12,ALB,EZH2,SAP18	PNN,MARCKS,PRRC2C,BOD1L1,ZNF787,ZFP91,MARK2,PCNP,GATAD2B,THRAP3,SRRT,SFPQ,SUMO3,YBX1,ATXN2L,RBBP6,MAEA,DNAJC8,EIF4B,MFAP1,NFX1,SAFB,LUC7L3,CHCHD3,F11,DNAJC9,GRN,BCAP31,HOOK2,BCLAF1,ZC3H13,CASC3,ZNF579,CSPG4,HDAC1,SNRNP70,PKP1,GPKOW,MRPS12,DDRGK1,BRCC3,ZC2HC1A,SUZ12,SRSF4,SLTM,MSRB3,RPS29,HTATSF1,F13B,SERPINB10,ALB,UBA1,PPHLN1,SMC1A,ATG16L1,RBMS1,ABLIM1,RPA2,RPS10,CDH5,RIPK2,CD59,USP11,EEF1AKMT2,P…
0.002148796826441	PNN,PRPF6,SFPQ,SNRNP70,THRAP3,ACIN1,RBM14	YLPM1,PNN,EIF4B,S100A10,SNW1,ARID1A,PRPF6,MARK2,SRSF3,MARCKSL1,RSRC2,ZC3H14,CLCC1,SRRT,SMC1A,SFPQ,MAEA,GATAD2B,RPS26,BPIFB1,RTF1,BLOC1S5,ZNF330,ATXN2L,PPHLN1,SNRNP70,TPRKB,SMARCA4,THRAP3,C19orf47,COL16A1,MAZ,MARCKS,CCDC12,PPP1R12C,TRAFD1,SAP30L,EIF3A,RPS29,ZNF574,GDI1,ACIN1,ZNF787,MYL6,PSMD9,TPR,REPIN1,RPL28,RBBP6,UBAP1,INTS12,CCDC50,PRRC2C,RBM14,SNX17,SRFBP1,CWC22,INO80E,GON7,CLIP2,EHD3,MARK3,SR…
0.00934260719469665	THRAP3,SAP18,SFPQ,PNN,ACIN1,GSK3A	ZC3H18,EIF4B,GPATCH8,PPHLN1,RBBP6,SAFB,THRAP3,ZRANB2,PHF3,MRPL30,SAFB2,BOD1L1,SRRT,SAP18,ZC3H13,HDGFL2,COX17,BRD4,CNBP,SFPQ,PCNP,SAMD1,SLTM,MARK2,RPS26,TCOF1,ARGLU1,EDF1,CHCHD3,FAM76B,C1orf174,SP3,MFAP1,RPL26,CSNK2B,ZMAT2,PNN,ACIN1,GABPB1,RBM6,MPDZ,TARBP2,GUCY1B3,HSPB8,ADAL,LYVE1,EXOSC1,RRP1,S100A4,VPS13D,MYH11,UTP14A,RIOX2,PRKAR1A,MPRIP,RAB10,UBE2G1,FTSJ3,LTBP3,ZFYVE16,CHCHD4,UMPS,CAB39L,MAPK8,M…
7.4828806703877e-05	SNRNP70,ALB,IK,SF3B2,EFTUD2,UBE2A,RBM14,SFPQ,CSNK2A1	ALDH1L1,ENPP2,NAT10,CSNK1A1,EIF3C,SNRNP70,RANBP2,CHERP,POLR2H,RBM10,LEO1,FABP4,F13B,SNCA,AKR1C3,CES1,PKP3,CSAD,GMPPB,ALB,ITGA7,HPX,LRG1,CDH5,URGCP,JCHAIN,SERPINA7,IK,NEB,SUPT5H,SF3B2,POLR1B,SON,PLTP,SIN3A,SULT1A3,ANK2,HBG1,ANAPC2,GPD1,RRP1,POLR2F,EFTUD2,U2SURP,UBE2A,RBM14,HTATSF1,CHCHD5,CNOT4,FRZB,LALBA,SFPQ,PSMD2,ELL,ZNF579,APEX1,KCMF1,RPL10A,CTNNBL1,CSTF2,POLR1E,NEK7,TAX1BP1,NAA50,USP9X,CSNK2A1…
0.00934260719469665	PNN,SFPQ,THRAP3,EZH2,CSNK2A1,API5	ZNF787,PRRC2C,SLTM,PNN,ZFP91,TCOF1,SRRT,YLPM1,EIF4B,BLOC1S5,SFPQ,THRAP3,SRSF3,ZNF460,BOD1L1,SERBP1,RBBP6,CHMP2B,WDR33,TRAFD1,HGS,SMC1A,NFX1,HDDC3,UQCRQ,MARK2,MARCKS,PPHLN1,ATXN2L,EFHD2,CAPZB,LALBA,NDUFA7,COA6,TACC1,SUMO1,SUMO3,EIF3A,SNX2,SAFB2,C1QC,PDCD6IP,F11,RABGAP1L,NOLC1,CTCF,CHCHD3,ZC2HC1A,DYNC1LI2,RBMX,GATAD2B,ARPC1A,EZH2,YTHDC1,CSNK2A1,SRSF5,MECR,SEC16A,NUMB,CDKN2AIP,FCER1G,MIF4GD,ARGLU1,S…
1.15957344722378e-05	SFPQ,PRPF6,SNRNP70,PNN,THRAP3,LUC7L2,SART1,IK,MED12,SF3B6	SFPQ,PRPF6,PTMA,SNRNP70,PNN,APOC3,SERPINA7,THRAP3,EIF3C,RTF1,PADI4,GPD1,STX5,GPLD1,CPSF6,ITGA7,FNBP4,SOD3,CD93,SRRT,SLTM,SMIM12,ALDH1L1,MYCBP,HPX,REPIN1,LUC7L3,FBXO28,SNW1,SRSF7,PPM1G,SRFBP1,A1BG,TMEM106B,RBM10,NDUFA1,BPTF,BRD4,AMBP,ADNP,BOLA3,LUC7L2,ATXN2,PPP2R2D,POLR3A,RAD50,SRP68,RALY,HDAC3,MRPL38,FETUB,SUPT5H,KLKB1,SUGP1,SELENOW,ASPM,CDK7,FAM120A,BAG1,U2SURP,ACTB,POLR2C,CWF19L2,SART1,MATR3,DN…
0.002148796826441	THRAP3,SNRNP70,SFPQ,PNN,LUC7L,METTL3,IK	REPIN1,THRAP3,SAFB,SNRNP70,LUC7L3,SERBP1,MEPCE,ENPP2,SRRT,SFPQ,PNN,RBBP6,PNISR,SPATS2,YBX1,WDR46,MINK1,DNAJC7,NOP14,ZNF638,IGF1,ILKAP,YLPM1,SMNDC1,HSPB8,CENPB,MMRN2,CLCC1,CSTF2,ANKIB1,PTMA,SCAF8,LRRC57,RBM6,WDR33,CSF1R,LSM3,PSMD3,BBS1,SRP68,PRKRIP1,ELL,ATXN2L,EIF5B,NSMCE3,DIDO1,ELOA,HDLBP,CHMP4B,MAX,SPEN,RCN2,MAGED1,MRPL20,SRC,TULP3,FERMT2,POLR3E,LUC7L,UBTD2,BTD,METTL3,RRS1,DAPK1,PSMD4,CIP2A,MRPL…
7.4828806703877e-05	PNN,PRPF6,CHD4,BCLAF1,IK,SART1,SF3B2,THRAP3,SRPK1	PNN,EIF3C,PRPF6,ZNF638,RBM25,CHD4,BCLAF1,TXLNA,ELL,WBP11,RBBP6,EIF4G1,SON,MGLL,KIF11,MIB1,THBS4,APOH,RNF40,TPR,SMC4,STMN1,PGLYRP2,PDS5A,YBX1,IK,CCDC12,SART1,UTP3,DNAJC7,CUL4A,SF3B2,NOL7,SRFBP1,NOP16,ZRANB2,FAM192A,DUSP3,THRAP3,MYO1C,EHMT1,NOP14,ZNF24,AGT,RTF1,LARP4B,SNX17,DHRS11,ORM1,RPL32,BBS1,GATAD2A,MAN1A1,GAMT,AIDA,NKTR,PPIL4,CSTF2,RPL12,RAI1,DKC1,C19orf47,ANLN,TOP1,RANBP3,POLR2J,LRG1,BEND3,I…
0.00934260719469665	PNN,BCLAF1,PRPF6,THRAP3,CHD4,API5	PNN,BCLAF1,RBBP6,ZNF24,PPIL1,ZNF638,RNF40,SRFBP1,PNISR,PRPF6,ARID1A,TPR,PRRC2A,UTP3,EIF3G,PDS5A,PRRC2C,RBM26,C19orf47,KRI1,SDE2,CCDC12,BRD4,CDC73,RPL17,TANGO2,RBM25,THRAP3,YBX1,EHMT1,SMARCA4,SP3,ZC3HAV1,NOP14,NMRK1,INO80C,MYO1C,UTP18,PCNP,SAFB,THBS4,VPS11,ARAF,SLC7A6OS,POLR2A,CHERP,FAM136A,GSTM5,POLR1B,CENPF,DIS3L2,CHD4,PCNA,DNAJA1,EIF2S1,PTMA,WDR46,MTUS1,CMA1,API5,KIF11,GMPR2,AGR2,SMNDC1,C12orf1…
0.000638787209076376	NDUFV2,HNRNPL,KHDRBS1,YBX3,ACTB,VAPA	MRPL57,CHMP5,PCNP,TOR1B,FOLR2,NDUFA1,LUZP1,CNOT7,DUSP3,ATP5D,NDUFA11,BCLAF1,PPP1R2,GINS2,DDB1,PLVAP,MTDH,ZC3H4,SNRPA,ILF2,NDUFV2,KIAA1143,GPX1,DBNL,RPL28,HNRNPL,EVI5,MAEA,RAD50,ASNA1,LYST,ZFAND3,CHCHD4,USF2,NPM1,CUTC,TOR1A,PRCC,MAZ,CCNT2,XRCC6,FAS,ACSF3,MAP4,PIK3C2B,ZFAND5,USP33,PRSS8,GNB2,ZYG11B,NFX1,GID8,RPL31,C12orf4,ZRANB2,KHDRBS1,ACAT2,VCAM1,PHKA2,SAR1A,RWDD4,MRPL33,MARCKS,KHNYN,COMMD3-BMI1,…
0.000638787209076376	NDUFV2,HNRNPL,KHDRBS1,YBX3,ACTB,VAPA	MRPL57,CHMP5,PCNP,TOR1B,FOLR2,NDUFA1,LUZP1,CNOT7,DUSP3,ATP5D,NDUFA11,BCLAF1,PPP1R2,GINS2,DDB1,PLVAP,MTDH,ZC3H4,SNRPA,ILF2,NDUFV2,KIAA1143,GPX1,DBNL,RPL28,HNRNPL,EVI5,MAEA,RAD50,ASNA1,LYST,ZFAND3,CHCHD4,USF2,NPM1,CUTC,TOR1A,PRCC,MAZ,CCNT2,XRCC6,FAS,ACSF3,MAP4,PIK3C2B,ZFAND5,USP33,PRSS8,GNB2,ZYG11B,NFX1,GID8,RPL31,C12orf4,ZRANB2,KHDRBS1,ACAT2,VCAM1,PHKA2,SAR1A,RWDD4,MRPL33,MARCKS,KHNYN,COMMD3-BMI1,…
0.00642000639505257	TJP2,RAE1,CTNNA1,TJP1	GATAD2B,ZNF787,RPS26,NDUFA7,TBCA,MARK2,TXLNA,SARNP,SUMO3,ZFP91,PEX3,BUD13,SMC1A,PRRC2C,CLTB,SEPHS1,HDDC3,SRSF3,TUBB,SAR1A,F11R,RAC1,TJP2,CD47,GNS,C1QC,TACSTD2,APCS,WDR35,CLDN7,SCAMP2,RAE1,MAZ,MTX3,RAB5A,TRAPPC2,TKT,PEPD,CMC4,CLCC1,DPH5,CCDC86,DHRS7,TANC1,NHSL2,PTRHD1,KPTN,CCDC93,RAB25,SEC23B,CDC42,ANKLE2,ANKRD16,HCLS1,SDCBP,SKAP2,ARHGAP25,CTNNA1,CHMP2B,IRAK4,PRAG1,ARL2,LRWD1,TARS,COBL,RARS,CPQ,ST…
0.00689728285801005	TMEM87A,BET1	TMEM214,SRPRB,TMEM87A,STT3A,TM9SF3,NSDHL,F11R,SEC61A1,ATP2C1,SPINT1,CUL4B,GLG1,HM13,GAMT,CTNNB1,DSC2,CSNK2B,BET1,ATP13A1,PDS5A,TMEM33,VTCN1,VAMP8,TOP1,LMAN1,EPCAM,IGF2R,PSMB3,CNOT10,RREB1,SRP68,HEBP1,XPA,SEC62,PACSIN3,RBM26,SLC27A2,SPINT2,PLTP,KIF5B,BBS1,CAPG,HMGB1,CD3EAP,TOMM5,WISP2,RNASEH2C,CAMP,PEA15,SPG11,DCAF13,UBTF,S100A4,CASK,PKIG,KLHL11,CSAD,ZC3H15,HIP1R,EPHB3,ANGEL2,ATL2,MYO18A,SF3B1,MAP…
0.00689728285801005	TMEM87A,SPCS2	TM9SF3,RPL7L1,TMEM87A,CCDC47,SON,ZCCHC6,UQCRB,SPCS2,GLG1,NOC2L,PRSS8,SPAG1,IDS,SMG5,RPN1,ARL6IP1,SEPT2,RER1,EMC4,ARHGEF10L,ZKSCAN1,TP53RK,THEM6,LSM2,KXD1,TWISTNB,PPOX,RAB1B,BAX,ZNF638,PRTN3,SEC61A1,HAUS4,GTF2A1,ANKFY1,RMND1,CTSH,PSMD3,VAMP8,ATP6V1C1,NSDHL,NAA20,FAM3C,PUS10,PMF1,TIMM21,AHR,MRPL52,NKTR,COX20,UQCRQ,COX7A2L,SEC16A,NDUFB6,HMCES,RAI14,APOBEC3G,SH3BGRL2,ADAM10,MPC2,POLR3E,TRIP13,SRPRB,P…
0.00162101386364575	ACTB,PTBP1,NOLC1,ATP5B,YBX1,RPS18,BRD1,DHX15,SRSF7,RBM14,HNRNPA3,RPA2	ZNF787,ZFP91,EIF3A,PNN,GATAD2B,RPL35A,ACTB,ELOA,PTBP1,YTHDC1,RPL28,ZC3H13,ACTBL2,SETX,UBAP1,GID8,ZNF330,CWC22,EEF1A1,COPE,C19orf53,ARGLU1,NOLC1,MAP7D1,SRRT,SLTM,DDA1,SUMO3,MARK3,ATP5B,EIF3M,PPP1R12C,ARID1A,THRAP3,RPSA,YBX1,RACK1,RPS18,INTS12,HSD17B10,MARCKS,SNRPE,PPP4C,SMAD5,BRD1,RANBP9,ATP5D,MARK2,SEPHS1,SERPIND1,DHX15,SRSF7,ASCC1,RBM14,LALBA,GNG5,SAFB,NDUFA1,TOR1AIP2,FABP7,ZNF574,YWHAH,CLTB,NEM…
0.000608135317245258	TNC,FN1	PTBP1,SARNP,ASNA1,TNC,RPS11,CNOT7,PRRC2C,MRPL55,LUZP1,CALD1,CLTB,HNRNPDL,RPS29,RPL35A,RPS15A,RPL32,ATP5B,PPIA,EGLN1,LRPAP1,INO80E,FAS,FKBP2,NXT1,CUTA,YBX3,ELOA,GET4,ZFP36L1,CWC22,RRP8,NOL8,MRPL42,NEMF,STK10,NDUFA11,NUDT16,NDUFS3,ATP5A1,ZC3H4,C1orf50,MED21,GATAD2B,GTF3C6,DHRS11,SMC1A,INTS12,BUD13,PCNP,QTRT2,CSN2,MSRB3,RPL29,CUL4A,AMPD2,MARCKS,MARK2,DHRS4,WFDC2,NUBP2,CFAP20,AFAP1L2,ANKFY1,TGFBI,PHF…
0.000608135317245258	TNC,FN1	RPS11,TNC,CALD1,PTBP1,ASNA1,YBX3,PRRC2C,EGLN1,RBM26,CNOT7,CLTB,PNN,HNRNPDL,RPS15A,SARNP,NDUFA11,NDUFS3,GTF3C6,PCNP,FKBP2,PPIA,SMC1A,MRPL55,TGFBI,AGFG1,RPS29,NOL8,THRAP3,CUTA,WDR61,RPL32,RRP8,LUZP1,DHRS11,SRFBP1,PIN1,MAP3K7,ZFP36L1,CWC22,STARD5,SRSF7,MARCKSL1,NDUFV2,MRPL42,RBMXL1,CHGB,IK,NEMF,ANKFY1,SON,EEF1A1,MARCKS,AMPD2,REEP5,PSPH,ASAP2,WASHC5,BCKDHA,MAMDC2,SEPSECS,PAG1,CPSF6,ARRB1,LAMTOR2,APBB…
0.000736639436110852	NAT10,TRIM24,MED12,CNOT3,EZH2,MED23	CLIC3,NAT10,PRKRIP1,SMAP1,RNF7,PCCA,STRBP,TRIM24,SIN3A,SNRNP70,SFRP1,CBR3,PAFAH1B2,CDK9,FRZB,HTT,THOC2,TMOD1,SNRNP200,SNTB2,CNRIP1,NELFB,AQR,MARK2,SAFB,MCAM,CAPN2,KRI1,CCDC43,UBE2A,HMG20B,ADNP,AIMP2,SBNO1,RGCC,TAF1,HELZ,RHOB,NOM1,DNAJB6,CDK13,HEATR6,ATP6V1H,U2AF2,GCN1,KLC2,MAP1S,WASHC5,SF3B2,LCLAT1,KYAT3,AKAP8L,H6PD,MED12,RRP8,POLA1,PTPN1,NRP1,BCL7B,RPS17,PDS5A,NAA15,UBAC1,SRSF7,CNOT3,ASPH,BECN1,…
1.00336837239804e-06	SORBS3,TNS1,UTRN,OSGEP,PPP1CC	TNS3,EPB41L2,CCDC50,COMMD2,KCNAB2,MNAT1,ELMO3,SEPT4,TMEM30A,INTS13,MRPL33,DIS3,DYM,PPP1R12C,D2HGDH,CD36,CXorf38,NMRAL1,FGD2,PRKG1,KLC4,FNBP1L,PPP1R21,ARHGAP31,KANK2,SORBS3,YWHAG,MARK3,CRYAB,CXCL12,MRPS24,RPS11,APOL2,OTULIN,CHMP2A,TNS1,MITF,DDX3X,CCDC88B,MTMR9,UTRN,PREX1,DPYD,MAP7D1,TPMT,SYNPO,GMDS,SP1,MSN,OPLAH,CFHR2,ACOT9,ALDH1A3,ALDH1B1,KANK3,POLR3E,ARL3,CTH,SULF1,TMEM109,FAM168A,ZC3H12A,TAGLN,…
0.000935349152883111	TNS1,SORBS3,UTRN	TNS1,PDLIM4,KANK2,LPP,ILK,FIS1,NEO1,TRIP10,FERMT2,LMNA,LGALS1,TRIM56,SORBS3,LIX1L,MPRIP,UTRN,PLEC,MYL9,MYLK,LIMS2,NFKBIE,GPX3,ITGA5,AFG3L2,PPM1B,STARD5,RAB23,UBE2V2,VCL,ARL15,LMCD1,LMO7,ALDH1B1,FSTL1,PLS3,APPL1,SNTA1,DPH5,ZC3HAV1L,TBCEL,FHL3,IKBIP,HIBCH,DCAF11,NOM1,NRP1,IGFBP7,SLC38A10,EDC3,SEPT11,PRKG1,FAM20B,PDLIM2,DTNBP1,ZC3HAV1,EMILIN1,PPME1,CNOT11,BSG,TGFB1I1,BRIX1,SET,RNPC3,DAGLB,POGLUT1,HT…
0.000935349152883111	TNS1,SORBS3,SNTB2	EFEMP2,KANK2,TNS1,FH,APOE,NXT1,ANG,HSPG2,SORBS3,MSRB3,RANBP10,C1QC,CAVIN3,TPM1,TPM2,FSTL1,EFEMP1,RPL39,CD59,LPP,EPB41L2,YIPF5,TLN1,TXNDC9,CCDC102A,PDLIM2,SNTB2,FHL1,CSNK2A1,ATRN,COX8A,MTPAP,TBRG4,PTAR1,PTGS1,SAP30L,LMNA,RBMS1,UBE2V2,SEPT7,SNX2,LTBP1,CXCL12,AP2S1,PDZRN3,NECTIN4,FLAD1,CPB1,CNN1,CSRP1,SORBS1,ATP5L,PODN,GGCT,ASNA1,RAB11FIP5,MRPL52,CPZ,CCZ1,PTER,HIBCH,ANGPTL2,BPHL,IGFBP7,SDCBP,LSM8,TU…
0.000290204609503736	CTCF,HNRNPR,TOP1,RPL10,BAZ1B,GLYR1	RPL23A,CTCF,BCKDHB,GUK1,C14orf166,CTU1,ATP9A,ATP2A2,ZFAND6,ABHD14B,BLOC1S3,CTSG,EFS,LMAN1,TOR1AIP2,CD46,GOLGA5,AMDHD2,HNRNPR,NDUFB11,ITGA11,TOP1,KIAA0513,HMGB3,TUBG1,NDUFC2,PIGT,TRIP4,SMC4,PPAN,MAT2A,WFS1,GIMAP4,SMAD5,EHMT1,SURF4,CENPC,TIMMDC1,LUZP1,PRPS2,DPYSL2,ADAM15,OLFML2B,RPN1,C8orf82,NDC1,EDC3,CSE1L,GSS,RPL5,RAB2B,PRPF40A,WNK1,MBOAT7,MICALL2,TRIP12,HEXB,CSF1R,TXLNA,SRPRB,LSG1,TOR2A,ZFAND5,G…
0.00216451233674398	TOP2B,IK,CHD4,CSNK2B,TOP1	PRPF6,CLP1,SETD2,PDS5A,SRP68,TOP2B,TF,APOC3,ZMYM2,RBM26,CUL4B,NEB,ELOA,NKTR,SLC16A3,PGLYRP2,IK,HPX,SIN3A,SNW1,PHKB,CHD4,CSNK2B,SEC61A1,MAGED1,PSMB3,LUC7L2,TOP1,STX4,TTR,ZNF638,ZNF787,NFX1,SCAF1,POLR2A,TPR,SETX,SENP1,PEA15,RAB1A,CNOT3,OXCT1,SERPINA6,BRD1,PHF3,H2AFV,MED8,SULT1A1,ACSS3,PAFAH1B2,PBX1,FCER1G,OAF,LRG1,ZC3H18,PICALM,ZFX,RB1,TAF5L,CFD,GOLGA3,NUBP1,NDUFA7,AHSG,SYPL1,RPS16,CCNL1,RAB11FIP1,…
0.000290204609503736	CHD4,TOP2B,RBM14,IK,SUMO1,USF1	GOLGA3,ILKAP,PDS5A,CHD4,TOP2B,RBM14,RBM25,SMG7,MRGBP,SETDB1,DSP,TNS1,SLC4A1AP,ZC3HAV1,JPT2,CD14,STX5,IK,A1BG,SLC25A6,NKAP,PPM1G,SURF6,SCAMP1,RPS15A,SERPINA6,KANSL2,CAMK1,LSM6,S100B,RTF1,SCAF1,ALDH2,RPL23A,CUL1,SRP72,ARL6IP1,UBTF,GSS,GATAD2A,SUMO1,LPIN3,TINAGL1,INTS5,SERPINC1,BRD2,POGZ,CSNK1D,C2,SMARCA5,CYGB,GLMP,RARRES1,SYNM,DPM3,TMEM106B,CSPG4,CAT,NSMCE1,SIN3A,RCL1,PRPF6,HNRNPAB,RARS2,DHRS11,USF…
0.000290204609503736	CHD4,TOP2B,TOP1,SMARCA4,SNRNP200,RBM14	CHD4,PPM1G,EED,TOP2B,TNS1,H2AFV,TF,CUL4B,THOC2,KDM2A,RAB10,DUSP3,EIF3C,S100A10,LAMA4,HPX,ILKAP,TOP1,ZNF638,SRPRB,SLC25A6,RSU1,LYVE1,SERPINA3,SIN3A,SSR4,PRPF6,SMIM12,SMG7,DPM3,LARP7,GC,NOP56,CABIN1,SCAF1,RALY,TM9SF3,XAB2,APOA2,SMARCA4,SEC11A,ANXA5,AGT,TATDN3,ME1,STT3A,PCOLCE,APOC3,TOR1AIP2,ME3,PDCD11,NAT1,CLU,WFDC2,AARS2,TGFBRAP1,MAIP1,F5,CNDP1,TRAF7,HMCN1,SNRNP200,RBM14,NAA10,ABHD16A,SNTA1,MYO1C,…
3.13615279799628e-06	TOP2B,USF1,MTA2,CHD4,SMARCA4,IK,CTCF,HDAC1	TOP2B,SIN3A,SNRPD2,BPIFB1,SART1,NUP93,USF1,INTS5,MTA2,UTP6,ZC3H15,ZNF598,SLC4A1AP,DYNLRB1,NKTR,SUPT5H,TTPAL,NUBP1,CELF1,RPL18A,CUL4B,PPM1G,CNOT3,SLC16A3,FAM103A1,LMAN1,HNRNPA1,TNS1,DPY30,PLRG1,SERPINA4,NUCB2,CHD4,PDS5A,TATDN3,LBP,SEPT2,SF3B6,SMARCA4,IK,DOCK9,SMAD4,CTCF,NDUFAF5,PRKRIP1,CSAD,GSTM2,ACP5,KANSL3,NGLY1,ARHGAP31,DHRS11,PTBP1,MITF,ZFHX3,BAZ1A,SNTA1,NHP2,GAB1,EHBP1L1,HEXB,CD99L2,TFCP2,CAR…
0.00216451233674398	RBM14,SFPQ,SEPT7,SUMO2,TOPBP1	ZFP91,GATAD2B,PNN,MARCKS,ZNF787,PRRC2C,BOD1L1,RBM14,SETD2,SRRT,ARID1A,MARK2,ARGLU1,MFAP1,SMC1A,SLTM,ZC3H13,TCOF1,YLPM1,PCNP,RPS29,SRSF3,THRAP3,MARK3,SFPQ,INTS12,MAEA,ISY1,GID8,EIF4B,TMEM263,EIF3A,SAFB,GABARAP,RAB1A,SNX6,RPS5,RBM6,ZC3H18,CHMP1B,SEC11A,RPS15A,NOLC1,SNRNP70,APCS,DENND3,MUC2,KIAA0368,GPLD1,PGGT1B,ZYG11B,TSR3,GNG5,PPIL1,COL18A1,MAP7D1,RAB8A,SEPT7,TIMM21,TIMM9,SDC1,PYURF,DPM3,RPL26,NDU…
0.00999576315912918	SAFB,CABIN1,THOC7,ARID1A,ZFR,CDC16,KPNB1,NFKB1,MDC1,HNRNPDL	RBBP6,RBM6,ZNF638,CNBP,RTF1,LAMA4,PNN,ZNF24,PRPF6,SLTM,CCDC86,FBXO28,NKTR,SAFB,MEPCE,RXRB,GPATCH8,INO80C,SNRNP70,CUL4B,GATAD2A,WDR33,ZC3HAV1,EXOC3,SRP68,SNUPN,CABIN1,ZC3H14,BRD4,SON,EIF4B,PADI4,RBM26,APOH,NDUFA11,THOC7,ZC3H18,CHCHD3,RPL32,ARID1A,SH3BGRL2,MRPL30,MAP7,LAMC1,RANBP2,APOC3,C1orf174,CLINT1,CD93,TAMM41,NID1,MRTO4,PCMTD1,ZFR,CDC16,KPNB1,UBA6,CHD4,SLC7A6OS,NFKB1,CD36,ZMIZ1,HUWE1,SNRPD2,KC…
0.000301800441737393	MED8,SRRT,PPM1G,TP53BP1,TAF15,HDAC4,DNAJC7,SRSF1,CAPZB,SF3B1,SIN3A,KHSRP,RAD50	SLC4A1AP,YTHDC1,RBMX,PLTP,ELOC,TP53RK,BPIFB1,SRSF9,PSMD3,MED8,CSTF2T,ISY1,RBM22,URGCP,CPB1,SRRT,PPM1G,TTR,THUMPD3,THRAP3,ILKAP,TP53BP1,PPA2,LSM6,TAF15,LCMT1,AP1M1,NHP2,NFX1,KCMF1,DIABLO,HDAC4,MAP1B,LRCH4,BUD31,MUC2,CPSF4,ABCF3,ALB,DNAJC7,MRPS2,CLP1,SRSF1,GTF2I,IFT80,CAPZB,SRP9,RDH13,MAN1A1,BABAM2,DNAJC19,SNRPA1,ELL,AGT,HELZ,SF3B1,TRAPPC8,LUC7L2,EDC3,THOC1,MECR,SIN3A,KHSRP,EXOSC1,SDHA,U2SURP,FAM96…
1.90200072740484e-05	RBM10,DPY30,TP53BP1,KDM2A,PAICS,SF3B1,MED20,SIN3A,MED8,POT1,SFPQ,INTS9,FOXK1,MED22,TRIM28	RANBP2,EIF3C,HPX,SUPT5H,RBM10,NUP93,CSNK1A1,SRP68,NAA15,TF,CHD4,LEO1,SERPINA7,RTF1,PDS5A,EIF3D,SRP14,CHERP,GC,CSTF2,SRP72,DPY30,IK,TP53BP1,PRPF6,CNDP1,GOLGA3,ZC3HAV1,LAMA4,EPS8L2,CCDC92,NDUFV2,CCAR1,GTF3C2,KDM2A,VRK1,SRRM2,SERPINA1,CSE1L,KIAA0368,PAICS,CPSF4,KIF5B,TIMP1,SF3B1,SLC4A1AP,CP,OGDH,APOH,FAM120A,QARS,POGZ,EIF4E,PPP2R5C,SF3B2,CNOT9,RBM15,MED20,SIN3A,AP1B1,RBM25,ORM1,MED8,MAD1L1,GATAD2A,E…
0.0034136970986551	TP53BP1,NUDC,SAP130,CARM1,NFIC,RAD50,SMARCC2,WTAP,NBN,PRR12,CIRBP	GPALPP1,APOD,TRAF2,ANP32A,TP53BP1,IRF6,DHRS1,NUDT12,KMT2C,USP8,GGT5,FBXW9,VPS16,NOVA1,NUDC,SAP130,AHNAK,HSPA2,FAU,MAP1B,CARM1,SCGB1D2,BOD1,C1orf52,TMEM132A,KRT17,PHB,INPP4A,LMOD1,ACTN1,CAVIN3,MKL2,TLE3,PDCD10,SERPINA1,UBE3A,PLCB1,RBM14,NSRP1,TXNDC9,PKP2,PXK,FGF2,CSRP1,CSRP2,CAP2,ARHGEF5,CTPS1,LIPE,YY1,PDCD6IP,PPP2CB,SCCPDH,ZC3H13,MRPS36,TGM2,PCMTD1,YTHDF2,RTL8C,NFIC,RPL15,RAD50,UTRN,SMARCC2,MYL6,…
0.0034136970986551	ANAPC16,TP53BP1,NFIC,THOC7,CD2BP2,RBM5,SMARCC2,RBM10,SRRT,DGCR8,STRAP	CD180,SON,SETD2,HBG1,SARNP,PLEKHF2,S100B,ILKAP,QRICH1,ANAPC16,SHTN1,SNX16,MAN1A1,ADGRL2,BUD31,PNISR,TP53BP1,MELTF,NFIC,GUCY1A3,SAFB2,ZMAT2,SYNM,MTSS1,MBOAT7,THOC7,ZMYND11,RBP7,PCDH1,S100A1,CD2BP2,ESRP2,RABEP2,EXOC8,METTL26,PDS5A,CHMP2A,RBM5,CRYBG3,RBM14,NBR1,BPI,NUP93,SMARCC2,CPEB2,RBM10,ENAH,PGRMC2,GMPPA,FYCO1,ENY2,TBC1D10B,AR,THUMPD3,JMJD6,TSC22D4,KIAA1143,TEX264,ST3GAL1,NARFL,ISY1,MPO,SRRT,RTC…
0.00999576315912918	MYL12A,ARID1A,LSM3,SFPQ,SF3B1,SAFB,HNRNPDL,THOC2,RPA2,PARN	DPYSL2,RTF1,PRPF6,FUT11,UGP2,CD93,PNN,CCDC86,BCLAF1,JPT2,CPNE2,RBBP6,PHF3,ENO3,CTDSPL2,CHMP4B,SRRM2,SNW1,MYL12A,MYADM,C19orf47,RBM6,PGAM5,FABP4,BRD1,RRP9,ARID1A,HMGB2,UBE2G1,IRF2,LSM3,NRP1,GSTM2,ACTR1A,ATP5D,ZBTB7B,KLF16,EIF2S2,PADI4,CSNK2B,PTPN12,BRD2,KLHL11,SFPQ,ZC3H15,ADSL,MMP9,ZC3HAV1,CDK12,CREG1,GNB2,SF3B1,MEPCE,SAFB,TNK2,SF3B2,LUC7L3,ITIH5,ETFA,MICALL2,CNPY3,HIST2H2AB,CORO1B,LIMD2,RBM17,MIN…
0.0006790728849398	SRSF3,ZC3H18,THRAP3,SRSF7,PHAX,SMARCB1,CDK2,NOA1	PCNP,GATAD2B,TMEM263,SRSF3,ATXN2L,PRRC2C,RPS26,EDF1,EIF3A,HGS,MRPS18A,BOD1L1,CCDC9,POLR2E,NUDT16,RPS16,BRPF1,ZC3H18,SUMO3,MARK2,THRAP3,YBX3,ZC3H13,MFAP1,ZNF787,PPP1R12C,RPS18,UQCRQ,SMAD5,MARCKS,NDUFA7,ZFP91,NUP43,MAZ,BCLAF1,ARGLU1,RPSA,SRSF7,RPS5,RPL26,SAFB,CLTA,RAB3GAP1,RPS11,CIR1,GABARAP,PPIL1,CHMP1B,IPO9,NAA40,RAB8A,EIF4B,TUBB4B,WDR45,WDR45B,PLCL1,EIF2S3,HPCAL1,TRMT112,CLYBL,FAM20B,PPHLN1,RBBP…
0.00317262908138345	PNN,SRSF3,ZC3H18,SRRT,FEN1,ELAVL1,BUD31	RBM14,ZFP91,SMC1A,PNN,ZNF787,SERBP1,GATAD2B,SRSF3,PRRC2C,INTS12,CCDC9,YLPM1,USF2,CHMP1A,WTAP,SLTM,ATXN2L,MAZ,RPS26,RPS19,POLDIP3,RBM6,ZC3H18,GATAD2A,EIF3A,ACTBL2,ZC3H4,TMEM263,NFX1,MARCKS,SRRT,COMMD10,CHMP4B,SLU7,MFAP1,POP4,RBM22,PPCDC,HGS,ZC3H13,FAM76B,FABP3,NDUFC2,FUBP3,SMAD2,SUMO1,NONO,SAP130,NUP155,TRMT10C,FEN1,LASP1,FEZ2,CAPZB,ELAVL1,ZC2HC1A,NOTCH3,BCLAF1,CHCHD3,RFTN1,UBA1,EIF4G1,RPS15A,STIP…
2.13001250939245e-05	PNN,SRSF3,THRAP3,SRRT,ISY1,ELAVL1,EZH2,RBBP6,YTHDC1,FEN1	ZFP91,RBM14,PNN,SRSF3,GATAD2B,RSRC2,SUMO3,YLPM1,THRAP3,SRRT,BOD1L1,SMC1A,PCNP,MAEA,CWC22,SDE2,RPS26,PPP1R12C,TCOF1,INTS12,PRRC2C,ARID1A,ATXN2L,ZNF787,ISY1,MARK3,SMAD2,MARCKS,SETD2,NFYA,KANSL2,POP4,HGS,PPCDC,RBM12B,F11,USF2,FAM76B,AKAP8L,NDUFA7,LIN7A,CHMP1A,SMARCC1,EFHD2,YWHAH,ELAVL1,TIPRL,RRP1,EZH2,TGFBRAP1,RBM22,HAGH,STIP1,PTX3,KRT16,MVB12A,NCAPD2,SETMAR,MAOA,ZNF385A,EIF3M,MGLL,RBBP6,MAZ,ZYG11B,…
0.00317262908138345	SRRT,THRAP3,SRSF3,RBBP6,SAP18,U2AF2,SNRNP70	ZFP91,SLTM,GATAD2B,PRRC2C,SRRT,BOD1L1,ZC3H4,THRAP3,SUMO3,EIF3A,CCDC9,PCNP,SFPQ,EIF4B,BLOC1S5,SRSF3,UBAP1,HGS,ATXN2L,SAR1A,PPP1R12C,POLR2E,LBH,CHMP1B,YLPM1,RBBP6,MAEA,SMC1A,CWC22,MARK2,SNRPG,HDDC3,ACIN1,SP1,SAP18,ATL3,NCL,EDF1,MRPS12,RPS11,CCDC93,TCOF1,EFHD2,TRAFD1,RPS29,ZNF330,IDNK,MFAP2,U2AF2,CRELD2,FOSL2,NDUFA7,BCLAF1,BRPF1,HDGFL2,ZNF622,CCNT1,KLHL42,EIF2S3,RABGAP1L,F2,EEF1A1,LYVE1,DCTN3,TINAGL…
0.00317262908138345	PRPF6,PRPF40A,ZC3H18,U2AF2,MRPS14,NOA1,SRRT	ANKRD27,LRIF1,ZC3H4,TRMT11,LSG1,OSGEPL1,VEZF1,RANBP9,TXNDC17,GGA3,CTNNBL1,PGGHG,LDLRAP1,TYW5,SFRP1,ZCRB1,TBC1D2B,MIB1,BORCS8,GTF3C6,PPIC,CLTB,L3MBTL3,ANAPC10,PPIAL4C,DPM3,PEX3,CSN2,RBM42,RBM26,TMX1,STK38,RPL35,SNAP29,MIF,CHMP4A,PRPF6,PCNP,RPL35A,ARIH2,CEP192,LTBP2,CLIP2,RPS15A,ASNA1,ZRANB2,SDAD1,PRPF40A,RPS20,SCLY,ZNF638,SUPT6H,ADO,POLR1D,CRYBG3,CTCF,FAM49B,ZC3H18,IFT43,ZGPAT,FKBPL,U2AF2,PPIL1,KI…
0.00689728285801005	IFT20,CHCHD2	PHF3,SAFB,BOD1L1,SAP18,THRAP3,CUTC,TMOD3,MFAP1,TPR,ZMAT2,SERBP1,ARGLU1,ZC3H13,SNRPE,CNBP,BRD4,RBM6,VAMP8,NOLC1,TRIR,CHCHD3,PNN,BCAP31,PNISR,SAFB2,SRSF7,USP36,ACTBL2,IFT20,CTNNBIP1,ZC3H18,RTN4IP1,TRMT11,ZRANB2,NUDT16,PGLS,WDR33,SLC39A7,ATG4A,C5orf24,RPL26,BRPF1,CABIN1,MEN1,DNAJB12,INSR,ZNF787,ZNF574,SRSF3,PIH1D1,EDF1,MARK2,EIF4B,HTATSF1,UBE2A,PPIL1,GABPB1,NUP54,UBE2R2,RWDD4,AP5S1,RIC8A,PCBD1,TCAF1…
0.00380855217994249	H3F3A,TXNIP,TRIM28,HCFC1,CREBBP,RPA1,U2AF2,HEXIM1	SMAP1,MED20,AGPAT5,GTF2E1,ING1,ZNHIT6,RUSC1,PYGL,TPRG1L,TRAF6,RBMX,TP53RK,GLRX,CYP27A1,ARL8B,RAB4A,DDX17,H3F3A,TXNIP,STRN4,NOP9,PNKP,TATDN3,ELMOD2,TRIM28,MXRA5,UNG,PTGFRN,RDH13,HNRNPUL2,HCFC1,ATP5F1,ACOT13,HK3,BMS1,TARBP1,EHBP1,HIP1,SNCA,ERAP2,CSTF3,WDR70,GFRA1,FAM129B,FH,ADPRHL2,CREBBP,NASP,SLC9A3R2,YWHAB,INTS5,MLKL,PSPC1,MAP3K6,VBP1,STRBP,CNOT2,PRPF31,TMEM11,MORF4L2,NDUFC2,RPA1,SF1,DPY30,NOL9,C…
0.00150390032740366	TRIM29,BOD1L1,MARCKS,RPL26,DCTN1	TBC1D9,TRIM29,GLUD1,GATAD2A,CNBP,HGS,UBL5,AKR7A3,PCNP,BOD1L1,MARCKS,MARK2,HSDL2,EIF3A,EIF3C,GATAD2B,RPL18A,SDE2,NDUFA13,CD59,FOXA1,SERPINB5,KTN1,ATRX,ESR1,DPH5,CIZ1,FAHD1,PRRC2C,PIP4K2B,ACIN1,RPS21,BCLAF1,SZRD1,FNBP4,MPZL1,TFF3,ELL,TATDN3,TBCA,ZFP91,RBBP6,PRPF6,PTBP1,FBP1,ARF3,RTFDC1,RPL26,ACTA1,RPS11,SMARCB1,RPS26,GID8,CRAT,PHF12,FBLIM1,TTC33,MSH2,RFC2,MAP4K4,PCBD2,ECI2,SMAD4,ANP32E,HAPLN3,PIK3C…
0.00556181584302135	TRIM29,SUN1,SVIL,RNF31,TTLL12,PIH1D1	PARP14,DAB2IP,MDK,PHF14,PARD3,DOCK7,EXOC6B,ABAT,VTCN1,PTK7,POLDIP3,TRIM29,ITGB1,PBLD,TAB3,MTMR2,EPCAM,IMPA2,MZB1,SIPA1L1,CHMP1B,PRRC1,TCAF2,IQGAP2,NF2,GLS,CRIP1,MDC1,LSM14B,AIFM2,SUN1,C11orf96,NFIX,DHFR,VPS4A,NAMPT,SVIL,FRMD4A,COX5A,ITGA6,LAMP2,TRMT1L,PSME1,LAIR1,RNF31,IFT43,PRTFDC1,RPP38,GORASP1,PFN1,MPZL1,STX5,CAPG,GLUD1,KLHDC4,MAGI1,OGFRL1,EEF1A1,CHTOP,RHOT1,POSTN,CHMP3,RUNDC1,MRPL3,ATL2,HMOX1…
0.000935349152883111	NOLC1,ARRB2,POLR1B	GATAD2B,PNN,HDDC3,PRRC2A,SRSF3,ACTB,ZFP91,SRFBP1,RPS26,EIF3A,SRRT,THRAP3,NOLC1,ATXN2L,SLTM,ISY1,PPP1R12C,MYL12A,ZC3H18,SAR1A,ZC3H13,CCDC9,RPS11,RACK1,TMEM263,SMC1A,LBH,PRRC2C,SAFB2,CCDC86,BOD1L1,ZC3H4,RPS19,SAFB,SNRNP70,SP100,LIN7A,KERA,CCDC22,LSM7,VPS29,POLR1E,FBP2,ALCAM,RPS5,ARRB2,GTF2H1,ALDH1L1,ACY1,EIF5B,MICAL3,DCLK1,FRMD8,MCMBP,LYAR,PLRG1,ZC3H14,SYNJ2,EPHB3,TNS3,GFRA1,EFHD1,CCDC97,MAN2A1,BCA…
0.000172345631838929	SRSF3,EIF3A,RBMX,SRSF7,PNN,SARNP,ZC3H13,PTBP1,SERBP1,RPL18A,SMAD5,DDX39B,GPATCH11,RUVBL1,NPM1	PHF5A,SRSF3,EIF3A,RPS26,RBMX,SRSF7,ACTA1,RPS18,GATAD2B,SUMO3,ATXN2L,PNN,RBM14,SARNP,RBBP6,ZC3H13,RPL32,NDUFAF7,TRAPPC11,UBQLN2,GRN,CUTA,PTBP1,YLPM1,ZFP91,ATP5D,SERBP1,RPL18A,RBM26,EIF4EBP1,SMAD5,NUP93,GSTT1,SAR1B,RPS21,GTF2E1,STRN3,BLVRA,BUD13,CMC4,VDAC3,MSRB3,CLIC6,NDUFAF4,TRAPPC8,TBC1D9,CA13,DHX38,DDX39B,BBS2,MIF,FBXO4,ITPKB,GPATCH11,KRT15,NAGK,POP4,STARD7,GTF2F1,CFAP20,PAAF1,AKR7A3,FAM84B,COX1…
0.00833841774453024	RPS2,CHERP,DROSHA,CHD4	UTP6,SPG21,NASP,CPSF1,RNF20,EIF3C,CRYL1,DNMT3A,NUP93,WDHD1,KIF13A,STMN1,DDX3X,MTHFD1L,RFC2,TRIM26,STOML2,NOC2L,DCAF13,CEBPB,NAA10,XPA,CXCL12,POLE3,RPS2,MTHFD2,PPIH,RSL1D1,CRYZ,NONO,AGR2,MAD2L1,MTA2,PDCD11,MKI67,CHERP,MAIP1,BRD2,HMGB3,DROSHA,TRIM33,MAPKAP1,OSBPL2,PHF6,RRP1B,SMC4,LSG1,NAT10,PHGDH,DHX57,ATG3,EMILIN2,COASY,TOE1,CASZ1,MIB2,IDUA,PABPC4,CMBL,EMC8,PAPSS1,HSPB8,CHD4,SMARCA5,KIF23,EXOSC1,R…
0.00432800906601397	UBR4,UBE2L3,EIF5B,KCMF1,KIAA0368	MAP3K7,INO80E,FMNL2,FAM111A,UBR4,UBE2L3,ROCK2,NDUFA13,COX6C,CYFIP1,HUWE1,EIF3G,AMPD2,GLUD1,HSPA1A,THUMPD2,EIF5B,PPIA,ITGB1,RPL18A,ARVCF,EIF2S3,ANKRD13D,KIF5B,NPC1,ECI1,CREB1,DSC2,PSAT1,SMG9,ZFAND3,NUP93,SAP30,UBQLN2,COLGALT1,CUTA,RPS15A,ATRX,LYPLA1,KIAA1143,ATP5D,MRPL40,EPN3,GRN,EIF1B,PPT1,BRD2,ROCK1,TMEM63A,PPP3CA,RRBP1,APCS,WASF2,KCMF1,MOGS,MOB1A,ATP5O,GON7,PSMA2,RIOX2,GOLGA1,NDUFA5,RRP1,NUB1,C…
0.00558186551056364	ZNF281,YAP1,AR,TARDBP	EIF5,ZNF281,SF1,PVALB,NAXD,SYNC,TRMT5,AGA,TAF10,KIAA0391,SERPINE2,STX17,ARFGEF1,ILKAP,MFAP2,ACP1,MAP4K4,MCMBP,KIF4A,YAP1,CENPB,YIPF3,ATRX,RAB13,IBA57,NKRF,SAP30BP,AVEN,TRIP6,TRNAU1AP,POLR2F,AMPD2,COL16A1,NDUFS1,HP1BP3,PAFAH1B1,TAF6,VARS,KLF16,SAE1,ITGA7,EXOC5,ZNHIT2,EHMT1,GAB1,SLC25A20,UBXN2B,GTF3C6,ZMYM3,AR,TOR3A,HERC1,TRPT1,PTPMT1,GNG12,CXorf56,KLC1,PLGRKT,KBTBD2,FAM114A1,KCTD15,PARP1,NDUFV2,CH…
0.00558186551056364	EIF4G1,ZC3H18,USP10,YBX1	MDP1,AIDA,BAZ1A,NAT1,EIF4G1,PHF6,ACADSB,CUL4B,DDX3X,RBBP6,DNMT1,GFRA1,CST3,ZC3H18,NT5C,CHD4,CLU,SRPK1,DNPEP,VPS16,AKAP13,ABI3BP,MAGED1,EIF5B,NISCH,ZC3HAV1,ENTPD5,MAN1A1,THBS4,INPP4B,AKR7A2,ITPK1,CD3EAP,BCAS1,DYNLT3,PNISR,AGT,PARP14,USP10,WDR74,RREB1,RRP1,MARCKSL1,CHMP1A,TMEM214,DSCR3,BCL2L1,PLPBP,PCYT1A,CLYBL,VAT1,PRPF18,ERAP2,SUOX,PPM1G,YBX1,COA7,GPATCH4,GP2,RPS26,FUT11,ASCC3,HEXB,HINT1,DDAH2,AR…
0.001339328486611	PPM1G,WDR36,CHD4,RPS6	NOP2,MYBBP1A,PPM1G,MOB1A,PRPF6,TTR,MAGED1,AGT,WDR36,TKFC,TOP1,EIF4G1,PPP1CA,MRPS5,SURF6,SF3B1,A1BG,RPL35A,ZNF280C,ARHGAP30,RSL1D1,ORM1,WISP2,SART1,WDR61,EIF3C,MYL6,RRP1B,THOC2,INPP4B,PRDX2,ELOA,CNOT9,CEP131,SMARCA4,RNF40,POLR1E,CHD4,SPTLC1,ADNP,RPL32,FAM136A,MAX,H3F3A,DDX24,PLRG1,RBBP6,NOC3L,WASHC4,RPS6,UTP6,DNAJC7,RBMX2,SERPINA10,SCLY,PMPCB,CREBBP,HPX,APOH,EP400,PGLYRP2,SEC16A,DDAH2,GTF3C2,RBM5,…
0.001339328486611	PPM1G,USP36,TBL3,WDR36	ELOA,PNN,RPS26,TXLNA,BPIFB1,EIF3C,PPM1G,PRPF6,SMIM12,MARCKSL1,CWC22,PDS5A,SEPT2,ARID1A,ZNF638,DNAJC8,SERBP1,BCLAF1,SRFBP1,C4B,ITIH3,USP36,VWA1,PIGR,GRHPR,TCOF1,RPL32,FCHO2,TTR,THRAP3,NUDT18,YBX1,MRPS18A,NFX1,HGS,ZFAND3,PRRC2B,WNK1,SNRNP70,UBE2O,NUDC,ISY1,CLCN7,LALBA,ZNF668,SEC61A1,RNF40,RTF1,UBL4A,HOOK1,MGLL,SLC7A6OS,SMG8,FAM136A,RAB9A,REXO2,DAG1,PHF21A,SUMO1,AMBP,FBLN1,CORO1C,HAUS6,PMM1,TRA2A,ND…
0.00733784765958348	CHMP1B,CHMP2B,CHMP1A,VAMP8	ZNF787,SLTM,ZFP91,SRRT,PNN,SMC1A,SRSF3,YLPM1,PRRC2C,TCOF1,ARGLU1,MARCKS,INTS12,CHMP1B,RPS26,WTAP,BOD1L1,HDGFL2,MARK2,NDUFA7,RBBP6,ZC3H13,MAZ,SETX,GATAD2B,ARID1A,SLU7,UBAP1,EIF4B,PSMA5,UQCRQ,CBLL1,CTCF,SRFBP1,DOCK9,YY1,NCL,SAFB,PPHLN1,TG,ZC3H18,C19orf53,SUMO1,NOLC1,MED8,SUMO3,TUFT1,ZNF330,MROH1,PPIL1,PITPNB,PES1,ANAPC1,PHF5A,RPS15A,GPX7,MAP2K7,KXD1,RCN1,PEPD,SOD2,RPL18A,CHMP2B,CTSS,ENPP2,RPS19,MAP…
0.0080329549108168	VAMP8,VTI1A,MED21	VAMP8,NDUFA2,RAB1A,PEX5,PLTP,ABHD14B,RFK,DNAJB12,GOLGB1,NENF,CYGB,NOL7,SNX33,EMD,EIF3C,YIPF3,STRADA,PPAN,CNOT7,DAP,TAX1BP1,RPL22,ESYT2,ZNF787,JUND,PPM1G,PLAT,MYCBP2,TRA2A,ATP2A2,ACOT13,DYM,STON1,PIH1D1,EIF1,CFAP73,ATP5B,RETREG3,VPS13C,SLC12A7,LIPE,MTDH,SARM1,LMAN1,RNASEH2C,CHCHD1,CCNT2,ELOA,ALDH7A1,ZFAND3,TRIM24,CNPY4,NT5C3B,PMF1,SLIT3,AUP1,NPTN,SIGLEC1,KNOP1,PPFIBP1,VTI1A,CD46,MED21,TOMM70,DUSP1…
0.000922630374864211	DOCK2,SYK,VAV1,PTK2B,BTK	GMFG,BECN1,ARHGAP4,LRCH4,PLCB2,UBLCP1,DPYD,DOCK2,UPRT,SYK,GIMAP4,VAV1,GMIP,RAPGEF1,HCLS1,CD163,TACC1,EML3,ITGB2,CPEB2,IRF5,SCRIB,MYO1F,RGS10,STK11IP,SLFN5,FHL1,CDH1,NCKAP1,SLC25A25,FGL2,CYLD,COMMD2,TBC1D10C,SET,TRAPPC6B,CCDC92,IL16,NCF2,PSMB7,PPP1R13L,ACSL4,SMC5,SOD2,MYO1G,PTK2B,TJAP1,CPA3,EZR,PACSIN3,PDZK1,TKT,DOK2,MRPL18,FAH,FGD3,HDAC2,CD74,TMEM173,CASP7,PTPN11,DPH2,ACAP1,CHMP4A,BTK,POLR3K,ARHG…
0.00248070136350948	VASP,PPP1R2,RBM26,YWHAH,UBR1,UFC1	SUMO3,HIRA,USF2,GRN,ZFP36L1,PPCDC,PPIA,TRIP10,CD59,CALD1,SULT2B1,NOTCH3,CSRP2,RBMX,SARNP,ATXN2L,RTCA,ARF4,PSMB3,MAP4,RPL35A,TRIOBP,NDUFA11,RPS20,SCGN,GTF3C6,NF2,FHL3,NDUFA7,EIF3M,LSP1,PPP1R12A,TPRKB,VASP,LRPAP1,PPIE,IK,ZFAND6,SEPHS1,EIF2S3,MSRB3,KANSL2,TFCP2,NDUFAB1,PPP1R2,RBM26,CREB1,AAMDC,BLOC1S5,UBL5,GPATCH8,CCDC50,MARCKS,YWHAH,SULF1,SYNJ2BP-COX16,UBR1,HOOK3,YBX3,OSBPL8,EDF1,BPHL,PTPN11,TPM4,F…
0.00135669351749756	ELAVL1	MRPS2,LXN,ZC3H14,FBXO28,HSPA12A,CREG1,TPM1,ATP6V1D,MED30,MYCBP,DDAH2,SURF6,ING3,GPALPP1,NBN,QKI,SAFB2,OGFR,DCTN3,CSNK1D,CRIP2,RTL8C,CLCN7,ETV6,ELOC,URGCP,TINAGL1,ASPM,RSRC2,PGM5,CAMK2G,C3,HSD17B11,PECAM1,TIMM9,PLXDC2,ITGA7,GGT5,SYNC,PDLIM2,COA7,SLC7A6OS,CDC42,CSTF2,C7,DNMT1,EDF1,AGT,MSRB3,NT5E,MXRA7,USP16,TCERG1,KCTD9,PZP,TRIOBP,NTN4,COX1,LYZ,TNFAIP8L3,CWC22,KIN,MRPS12,ARSB,CTSS,PRPF6,EML1,UBE2F,…
0.00967944465432822	CHD4,WDR36,PWP2	PRPF6,PPM1G,RBBP6,PNN,NKTR,EIF3C,CHD4,SMARCA5,TOP1,ARID1A,CUL4B,SETD2,ILKAP,SF3B1,RNF113A,TTR,SMIM12,GAMT,WDR36,POLR2A,ECD,LEO1,BCLAF1,NOP14,C11orf54,ZC3HAV1,ZC3H11A,INTS12,SH3BGRL2,BBS1,GNB2,PIP,RBM25,SAP30,HBG1,KNOP1,CWC22,PDS5A,RNF40,SRP72,PRDX2,RBMX,NFX1,RPS26,STK10,FAM192A,CELF1,YTHDC1,MRPS25,TAF7,HSPA5,NUP205,ZRSR2,ENOSF1,DARS,U2SURP,PKP4,TATDN3,HM13,SND1,SURF6,CLP1,BMS1,CLU,MCMBP,GCDH,ACAT…
0.00432800906601397	ZC3HAV1,KNOP1,RPL32,RRP15,BUD13	RPS26,ATXN2L,EIF3G,SON,CWC22,PHF5A,ARID1A,MRPS15,TXLNA,INTS12,EHMT1,ISY1,ZC3HAV1,PNN,KNOP1,PRRC2A,RPL32,CDC73,MAEA,ELL,ELOC,BBS1,PPIL1,SMARCA4,MAN2B2,RPL23A,PLRG1,SRRT,STK10,PRPF6,SNW1,ZC3H11A,TTR,PRRC2B,MOB1A,FCER1G,REEP4,CORO1C,RPL30,TIMP1,TPPP,EPB41L2,ARMT1,TLK2,SNX29,CDC42BPA,OPHN1,NBEA,DCLK1,TRAPPC2,ABCF1,DIAPH1,CCNT2,CAMKK1,RRP15,MARC1,UCHL1,PAPLN,STARD7,MGMT,AP3M2,MARC2,CTU1,SDHA,RIPOR1,AD…
0.00833841774453024	WEE1,SPAG9,NUP160,KIF13B	SLTM,ZFP91,ZNF787,ZC3H18,PNN,SFPQ,ZC3H13,SRSF3,MFAP1,RBM6,RPS10,HDGFL2,PRRC2C,BOD1L1,EIF4B,TCOF1,MAZ,DUSP3,TMEM263,MAEA,CCDC9,CCNT1,NOLC1,SMC1A,NDUFA7,EIF3A,SAFB2,SCAF8,RBBP6,INTS12,ZNF330,RPS26,PSMG3,CAPZA2,HGS,MRPL30,RBCK1,SAFB,UQCRQ,NSRP1,YY1,SNRPB2,PPHLN1,STRIP1,CCS,YWHAH,FAM117B,COX17,RABGAP1L,DPCD,GATAD2B,REPIN1,BASP1,NDUFC2,NAA25,WEE1,AAMDC,MPST,TXNDC9,HMGN2,SPAG9,EDF1,UBXN4,LSM6,CHCHD3,AR…
0.00931120288456407	PCBP2,TUBB,ZC3H13,CASP14,TP53BP1	ZFP91,PNN,GATAD2B,RPS26,MAEA,RBM14,MARK2,PRRC2C,GATAD2A,SERBP1,MRPS18A,YLPM1,SRRT,TBCA,ACIN1,SRSF3,WASHC3,BOD1L1,ZNF787,SMC1A,SAP130,ARID1A,CWC22,COX17,MARK3,MARCKS,TCOF1,SETD2,YBX1,WDR33,GRHL2,CNOT7,CASC3,ZYG11B,RBCK1,BRD9,NOLC1,SRFBP1,PPM1G,KHDRBS1,PCBP2,CNOT11,NAPG,ZNF622,RPP30,TUBB,SLTM,NCBP3,UBL7,BCLAF1,ZC3H13,AGPAT3,TGFBRAP1,SF1,UBAP1,SAP18,REPIN1,CERS2,CBFB,TBL1XR1,NXT1,RRAGC,CSTF2,HSPBP1,…
0.00385236468697971	RIOK1,XRN1,RPA1,RPL5,DDX24	VASP,DRAP1,GBP1,RIOK1,UNC13D,DOCK8,FBLN5,CD74,MYO9B,HCFC1,ECHDC2,SF3A2,ACAP2,GLRX5,FNBP1,SETDB1,NUP153,BMS1,ACTA1,PPT1,MFAP4,EIF3G,HLA-DMB,MYO5C,DERL1,BCL7C,ATL2,MIEN1,NUP93,COTL1,RNF113A,KIF2A,NSA2,XRN1,CTDP1,SAP30,GAMT,SCGN,ELL,RPL31,WDR46,ITGB2,PACS2,BUD31,HEBP1,IK,MRPL37,PIH1D1,SCRN3,EML4,CEBPB,CELSR1,CIR1,STEAP4,ERCC5,LSP1,LIMD2,TPPP3,COL5A3,TAPBP,PLCG2,RPA1,GFRA1,PTPN6,TMEM126A,AGPAT5,HLA-A…
0.00565008645150237	YBX1,RBBP6,CTCF,CUL4B,EZH2,API5,SUZ12,EEF1A1	PRRC2C,SERBP1,ZFP91,PNN,MARCKS,SMC1A,YBX1,ZNF787,THRAP3,SUMO3,YLPM1,SRRT,SAR1A,TCOF1,ACIN1,SETD2,ZNF460,RBM6,RBBP6,PCNP,RPL35A,SLU7,RPL29,RPS26,CCDC86,DPM3,CTCF,CUL4B,ZC3H14,EZH2,HGS,SCAF11,RRP8,SEC61A1,PRR12,DSCR3,MUC2,GATAD2B,PRRC2A,TMEM189-UBE2V1,NDUFC2,GPKOW,CHCHD3,RABGAP1L,ACAD8,REEP6,ARGLU1,PGM5,ZC3H18,UBE2B,API5,RIPK2,RPS29,C1orf174,NDUFA7,SCAF4,PCID2,SUMO1,ZC3H4,SUZ12,PRKRA,CP,EPC1,UQCRQ,…
0.000234503384365435	MCRS1,GABPB1,SP3,MAX,ZNF24,YY1,SP1	PNN,SF3B5,CREG1,MCRS1,SFPQ,PPP1R12C,SAP18,LUC7L3,PRPF6,ABRAXAS2,SUMO3,MMP19,THRAP3,ZNF598,ZC3H18,GABPB1,SP3,SPEN,ZMAT2,RPS10,SDE2,EDF1,SPATS2,SLU7,C9orf78,ZC3HAV1,RPL29,PHF6,ACIN1,SNRPD2,MAX,RIPK2,PLRG1,HIST1H3D,INTS12,TALDO1,RBBP6,MARCKSL1,ZNF24,ZRANB2,ILKAP,SNRPA,CBLL1,AAAS,ZNF574,SCAF1,BRD1,FUT11,SERBP1,CNOT11,PRKRIP1,YY1,STIP1,YIPF5,CNOT7,HTRA2,SON,RNF40,TKFC,MINK1,PLEC,SRSF6,SFSWAP,GM2A,BLOC…
0.00184555072030479	GATAD2B,SUMO2,ATP6V1B2,TRAPPC2	GATAD2B,HNRNPDL,CDKN2AIP,HDDC3,KAT8,SRSF3,SARNP,PPP1R12C,ZFP91,SMC1A,SUMO3,CHMP4A,CLTB,NMRK1,MAEA,RPLP1,SMAD5,WRAP53,GTF2A1,TPRKB,IP6K1,RPL35A,RPL29,EXOC1,ZC3H18,TMEM189-UBE2V1,BLNK,SLK,MRPS18A,PTBP1,ASNA1,SARS,NDUFA7,SUMO2,RACK1,RTCA,EVI5,CUTA,PRRC2C,SLTM,SAR1A,PYM1,UBAP1,RPS26,ZHX2,MARK2,BLOC1S5,GDI2,LTBP3,TOR1AIP2,GATD1,COX17,SAP30L,PCBP2,TBCA,MVB12A,MRPL55,ATP6V1B2,THRAP3,TBCC,TBPL1,MTDH,VEZF…
0.000641518282014615	ZC3H13,ZC3H18,MED14,EIF4A3,MED21	SMC1A,ZFP91,GATAD2B,THRAP3,ZNF787,BOD1L1,YLPM1,MARK2,PNN,SRSF3,PRRC2C,MARCKS,MAZ,SUMO3,WDR33,RPS26,SERBP1,RPS11,PCNP,RABGAP1L,MFAP1,PPP1R12C,SDE2,NDUFA7,RSRC2,DUSP3,ZBTB14,DNAJC8,REEP4,RPS10,NOLC1,NFKBIB,ZC3H13,NDUFC2,PAIP2,SAFB,RPS15A,RFC5,GCC1,HSPB11,SCAMP2,EIF3A,ADRM1,ZC3H18,TMEM205,SFPQ,CLTA,SNRPE,YBX1,DTWD2,TLDC1,HIST2H2AB,TWISTNB,MEAF6,TRAFD1,THEM4,SARNP,B3GLCT,SLK,CYB5A,RBCK1,RPP30,YWHAH,I…
0.000168058505710012	PNN,SARNP,SNRNP70,SRRM1,ZC3H14	PNN,GATAD2B,PRRC2C,ATXN2L,SRRT,CLTB,MARK2,RPS26,SARNP,TBCA,TMEM189-UBE2V1,LUC7L3,SNRNP70,PCNP,ZFAND3,RBM14,RBBP6,BOD1L1,SMC1A,YBX1,FNBP4,EIF4B,UBL5,SFPQ,RPS11,WNK1,PTBP1,SERBP1,SLTM,UQCRQ,ZNF787,PPIE,CHCHD3,NDUFA7,PTGDS,WDR33,YME1L1,ZNF579,C9orf78,NSMCE3,CNOT11,CHMP5,EEA1,PDLIM2,THRAP3,CCDC93,SRRM1,NKAP,CAPZB,SRFBP1,PALM2-AKAP2,CSN2,IKBKG,MTX3,DTX2,HTATSF1,GIT2,RPA2,MBD1,RPS29,FCER1G,KIAA1143,NFS…
0.00184555072030479	PNN,SARNP,SNRNP70,ZC3H14	ZFP91,PNN,GATAD2B,SMC1A,SRRT,MAEA,MARK2,PRRC2C,RBM14,YLPM1,ARID1A,SUMO3,SERBP1,YBX1,SUMO1,RPL35A,CLTB,FNBP4,SARNP,RSRC2,SFPQ,RPS26,ATXN2L,MRPS18A,TCOF1,COX17,RPS11,PCNP,RPS5,POLDIP3,ZC3HAV1,PPM1G,CUL3,SYNPO2,SNRNP70,PARN,EXOSC1,HGS,FUBP3,DCLK1,NDUFA7,ZC3H14,RPS18,FAM45A,MCMBP,MAN2B2,NOLC1,SH3BGRL2,PLCL1,FAM76B,UTP18,CHCHD3,PPIL1,VDAC1,ARVCF,BTD,RPS3A,SERPINB6,ANXA2,SNRPD2,GNB1L,EIF3A,AMPH,MPZL1,E…
0.00532722929380559	SAFB,RTF1,PNN,SRRT,ZC3H18,CHD3	ZFP91,SAFB,RACK1,TXLNA,VCP,RTF1,PNN,YLPM1,HS1BP3,PSMC3,YBX1,PCNP,ATXN2L,PSMB4,SRRT,FCHO2,CENPB,SMAD3,PPA1,SNRNP70,PKM,C17orf80,KDM6A,ZC3H18,SMARCA4,NFYA,ARL1,ETF1,FAM192A,SMC1A,MAEA,HDGFL2,FAM76B,ELOA,TBCA,TRAPPC4,PGAM1,TCOF1,SRSF3,IDS,CASC3,EHMT1,XRCC1,NUDT15,MFAP1,GID8,PTBP1,RPSA,RREB1,ARID1A,REPIN1,RNF40,ATRX,RPS26,SFPQ,AKR1C2,WNK1,POFUT1,VWA1,SRSF4,BRD9,CHD3,YEATS4,NFKBIB,HYPK,TIMM50,SSR4,CMP…
4.02242278950176e-06	ZC3H18,ACIN1,PNN,SLTM,SRRT,PPHLN1,ZC3H13,YTHDC1,RBM14,RBMX	ZC3H18,CCDC86,THRAP3,ACIN1,ZRANB2,YBX1,EDF1,RPS19,PNN,SRSF7,CNBP,ZFP91,BOD1L1,HDGFL2,SLTM,PHF3,SRRT,MFAP1,WTAP,NPTN,ZNF330,PPHLN1,EIF3C,SAP18,YLPM1,ZC3H13,TCOF1,CTCF,EIF4B,CHMP2B,TRIR,SUMO1,RWDD1,PRKAG1,TG,FNBP1,KLHL11,BCAP31,RABGAP1L,UBTF,RETN,FAU,NDUFA5,YTHDC1,IRS2,APCS,IFT80,CLEC16A,FN3KRP,SNRPG,S100A12,ZC3HC1,LIN7A,SUMO3,ARCN1,DRG2,RUFY1,NEMF,DSCR3,MTFMT,VPS28,ARL3,GATAD2A,RBMS1,TACO1,DERL1,N…
0.00532722929380559	RBMX,RBM6,ZC3H13,RBM14,XAB2,PNN	SUMO3,PTBP1,UBL5,PPIA,MARK2,RBMX,UBQLN2,MAEA,PHF5A,RBM6,TBCA,RPS18,ZC3H13,ASNA1,HNRNPDL,ARID1A,TCOF1,NDUFA7,MARCKS,CLTB,RBM14,GATAD2B,HGS,RPL29,RPS20,RPL32,PCNP,CUL1,RPS15A,SWAP70,SP1,GRIPAP1,LBR,RPS29,SCO1,XAB2,SUMO1,SAP30,KLHL11,MMRN2,PNN,RPS19,EEF1A1,SPCS2,DHCR7,PRKRA,LSM12,RPP30,ARHGEF10,MYBBP1A,CHD2,ILF2,CHMP1A,NCBP2,ALDH3A2,COMMD5,DSCR3,ACADS,BCLAF1,LAMTOR3,GRN,PYURF,C1QC,CLIC6,KANSL2,SARNP…
0.00532722929380559	RBMX,SLTM,RALY,RBM14,ACIN1,ZC3H13	SUMO3,SRSF7,SUMO2,RBMX,CEP57,LSM6,GATAD2A,RPL35A,RPS19,VEZF1,NUPL2,TMEM263,HDDC3,COMMD10,ZFAND6,RPS6KC1,FPGS,RABGAP1L,NDUFA7,AP4B1,RIPK2,MARK3,TARBP2,USP14,IRF2,GAPDH,ACTA1,CCDC9,MED22,MRPS33,LSM3,SLTM,DENND4B,REEP5,USF2,NAXE,C19orf70,RPL34,BRWD1,MAX,SHROOM2,STEAP4,LRRC40,SLU7,ARID1B,RALY,LCLAT1,RBM14,ACIN1,CBLL1,FTSJ1,KANK3,MARCKSL1,ZC3H13,RPS20,PRTN3,GATAD2B,BUD13,FCER1G,EIF4B,LAMTOR3,ZC3H4,CCD…
0.00532722929380559	SAFB,ZC3H18,PNN,RALY,RBM14,SRRT	C9orf78,UTP3,FAM192A,YBX1,RPL26,LUC7L3,KPTN,RTFDC1,RPL34,RRP36,AP5M1,UBXN1,NMRK1,THRAP3,RNF40,SNRNP70,NOLC1,SAFB,SERBP1,ZC3H18,PTMA,RPL28,HNRNPDL,CWC22,GPALPP1,FBXW8,SRSF3,GNB2,TAX1BP1,TRAPPC4,EDF1,ATXN2L,RHOA,PNN,TANGO2,MARCKSL1,RALY,SP3,MRPS12,ABHD14B,KANSL2,DIDO1,CARD8,YLPM1,SAP18,CHMP1B,HEXA,UBP1,PRPF6,UBE2I,RBM14,GSTM5,C19orf47,RXRB,SRRT,TAOK2,SEPHS1,EHMT1,PIAS1,PGLS,GOLGB1,ACTR1B,CASC3,SOD2…
0.0010855106102724	PNN,RBBP6,BRD4,SLTM,WDR33,SNW1,ZC3H18	ATXN2L,PRRC2C,PNN,PRPF6,MARK2,HAUS3,SMC1A,GATAD2B,RACK1,MARCKS,ACTA1,ZNF787,MRPS12,THRAP3,RBBP6,EIF1B,RPL36,CWC22,SARNP,SLU7,BOD1L1,NOL8,BRD4,KDM6A,RPS18,SLTM,ZNF24,TXLNA,ARID1A,WDR33,RBM33,ZRANB2,BTD,CCDC86,WDR82,HIST2H2AB,GRN,HGFAC,SNW1,YBX1,ALB,SNRNP70,TXNDC5,MRPS16,CARTPT,MEN1,SMG9,LIN54,CFDP1,MRPS18A,MCFD2,AARS2,TRIO,DHX57,PRDX2,ECM1,POLR2J,SERPINC1,TTR,UNG,GRIPAP1,NDRG1,EIPR1,NFKBIB,FAM136A…
2.94755511406821e-05	SAFB,ZC3H18,SLTM,ZC3H13,RBM6,YTHDC1,ZC3H14,RBMX,PPHLN1	SAFB,ZC3H18,GABPB1,PNISR,SLTM,EIF3A,HDGFL2,BRPF1,HMGN2,ARGLU1,NOLC1,EDF1,ZNF330,EIF4B,RPS10,RPL26,ZNF787,SRSF7,ZC3H13,CHMP1B,THRAP3,SMAD5,SP3,RBM6,YTHDC1,GABARAP,PYURF,MAZ,SFPQ,TRAPPC4,GNAS,RPS16,FAHD2A,TCERG1,CHMP4A,ADD3,GDPGP1,PRKACA,TOR1AIP1,SAFB2,ZC3H14,LCN2,CUX1,THOC6,DNAJB12,BOD1L1,SUMO1,MYL12A,EIF3M,YY1,ARMCX3,REEP4,COX17,EIF4E3,CAVIN3,RBMX,SLK,GTPBP6,TFAM,SLAIN2,CCDC124,SLU7,SRSF4,KIAA146…
0.0010855106102724	SAFB,ZC3H13,SLTM,RBM6,ZC3H18,PNN,PPHLN1	SAFB,SAP18,PNISR,ZC3H13,NOLC1,ARGLU1,MFAP1,MRPL30,HMGN2,THRAP3,TCOF1,GABPB1,EIF3A,SLTM,TRIR,ZNF330,CHMP1B,RBM6,C19orf53,RPS10,ZC3H18,YY1,SP3,REPIN1,USP36,TRAPPC4,EDF1,VEZF1,WNK1,CTPS1,VCP,CAVIN3,PAIP2,DFFB,FUBP3,CARTPT,YEATS2,PFKP,CHMP2B,ARMCX3,CYR61,ZFP91,EIF3M,USP14,ADRM1,RPS16,UNC119B,SF3B5,HDGFL2,SRSF7,NOTCH3,TANC2,HLA-F,TAOK2,MRPL21,SUMO3,SPG21,ARHGEF7,PPCDC,CSN2,PNN,BLOC1S5,RUFY2,PPHLN1,CCP…
4.90113461168725e-07	RBBP6,PNN,ISY1,RBM14,RALY,ZC3H14,ACIN1,ZC3H18,MZT1,PRPF4B,RTF1	RBBP6,PNN,RPL35A,CNBP,ISY1,ZFP91,BOD1L1,GATAD2B,SMC1A,ZNF787,CHMP4B,SUMO3,SARNP,MARK3,RTFDC1,ZC3H4,PCNP,NDUFA11,C19orf53,PRRC2B,SUMO1,SRFBP1,ARID1A,RPS18,YLPM1,RBM14,RALY,ZC3H14,SP3,CWC22,TRIR,MARCKS,NUDT16,SAR1A,NMRK1,RCSD1,MPST,RABGAP1L,PPIA,CCDC86,PRRC2C,ACIN1,SMC3,SCAF8,SERBP1,EIF3A,GNB2,SRSF3,SAFB2,RPS11,ZC3H18,UBL5,APCS,IMMT,LXN,SERPINB5,NDE1,EFHD2,RPL28,ARGLU1,RBP7,ANAPC4,CTCF,SAMD9L,MZT1,…
0.00854121907456476	CUL4B,CUL2	ELOA,SUMO1,NFX1,NUDT16,PRRC2C,DNAJC8,ASNA1,NUBP1,RPL28,RPS11,CWC22,RPL32,DDB1,PKP3,SARNP,GSTM5,RPL35A,WDR45B,CLIC1,NOLC1,PRKAB1,RPL18A,CUL4B,CARTPT,INO80E,C19orf53,BRD1,CUTA,FNBP4,EIF3C,TBCA,FCHO2,MARK2,C19orf47,MPZL1,PCNP,CLCC1,UQCR11,ARAF,PPM1G,SNUPN,YBX1,CELSR1,UBE2V2,KRT8,RUFY3,NAT1,ATP5J2-PTCD1,NUP205,FAM120A,OAF,MISP,COA7,SEMA3C,AZI2,ARID4A,EMC2,PMVK,RGS3,CUL2,TIMM23,P4HTM,CD44,WDR70,IFT52,…
0.000309850526737023	GATAD2B,GATAD2A,MTA2,HIST1H4A,CHERP	RBM14,PHF5A,USF2,SARNP,LSM6,RSRC2,SUMO2,GATAD2B,GATAD2A,ISY1,TTC9C,RBMX,UBE2V2,IK,NDUFA7,RRP8,VEZF1,TRA2B,SMU1,MTA2,HIST1H4A,MMRN2,EFHD2,ACSS3,SRSF2,BPHL,CC2D1A,ELOC,SYNCRIP,TMEM189-UBE2V1,MAPK3,NUP58,TRAPPC8,LPA,SLC4A2,RTFDC1,GOLGA2,LDHD,TNS2,CAPN1,CD2AP,NUMB,ABCB7,PRPSAP1,FNTA,TNKS1BP1,WIPF2,TSC1,PIGT,YWHAH,YTHDC1,ZNF185,GRB7,KRT17,MTPN,DNAJC10,TNXB,POLR2I,UVRAG,MCMBP,MINDY1,SCGB1D2,CADM4,GSTM1…
0.00589632292456315	ZNF217,KDM1A,KIF1B	ZNF217,TXNIP,FBXO18,KDM1A,MED4,POLE4,NIPSNAP1,ADD3,RPS9,PDE5A,TMED5,RXRB,ZMYM2,BET1L,ELP4,ACOT8,SEC16A,HK2,EIF5,APOD,HPGD,WDR48,UGGT1,PLVAP,SCAF4,CMC1,DBR1,MTMR2,LPCAT1,ELF3,DSN1,SMG8,LRRC1,ERF,PAXIP1,MED12,ZCCHC17,CALML3,TM9SF1,DEFA3,IL1RN,SSFA2,CSE1L,NUP153,GOLGA4,FADD,CHMP4A,AMOTL2,STX12,SAMD1,ARFRP1,PCF11,FST,SRPK2,PDLIM2,AASS,SAP130,GMPS,KIF1B,MGST3,GSE1,PSMD10,FAM208B,MAMDC2,ZMYM4,ESYT1,MDH…
0.00727692874448481	GATAD2B,GATAD2A,HDAC1	ZNF787,ZC3H13,CHMP1A,MFAP1,INTS12,EIF3A,COMMD10,COMMD3,PPHLN1,MAP7D1,CNBP,RBM6,SLTM,RBMX,RPL26,NOLC1,UBQLN2,RBBP6,COPE,UBAP1,GID8,RPL35A,CBLL1,CWC22,ACTA1,ABL1,TNRC6B,KANSL2,PNN,SLC16A3,RPL22,C19orf70,IFT20,GATAD2B,CHMP2B,GPATCH8,CARTPT,BOD1L1,RPS19,ACTBL2,POTEF,C19orf53,GATAD2A,EIF4B,NUBP1,SNX17,SP3,LAMB3,GABARAP,SRRT,PPIG,MMP7,RABGAP1L,COX17,DUSP3,SNRPB2,DSCR3,SAP18,NR2C2,SMC1A,CHCHD3,FKBP3,TMO…
0.00656493572270882	CENPB,ZMYND8,RNF2	MAEA,ZFP91,ZC3H13,SUMO3,ZFP36L1,PPIE,NDUFS6,PNN,CLTB,BLOC1S5,MARCKS,PRRC2C,SLTM,YLPM1,RACK1,RPS11,SMC1A,RSRC2,SMAD5,ALOX15B,CCDC9,ZC3H4,COPE,HSD17B10,VEZF1,SARNP,TMEM189-UBE2V1,ZBTB14,TBCA,CENPB,ACTB,ZHX2,NDUFA7,POLDIP3,FAM76B,PPP2R5B,SRRT,MFAP1,VAMP8,SERBP1,RBM6,PRDX5,NFX1,PTPN2,MAN1A1,ECE2,HNRNPA3,TXLNG,CCZ1,MRPL46,NDRG3,FKBP1A,RBBP6,CREBBP,NDUFA13,POLR2M,HPGD,EXOSC5,INTS8,SLFN5,CD99,RREB1,PLBD…
0.0027516520270888	MGA,TRMT1L,DDX54	GATAD2B,SRRT,TBCA,RPS26,INTS12,PNN,MARK2,ISY1,RSRC2,MARCKSL1,BRD4,ELL,CWC22,DLST,RPS29,ATXN2L,MARK3,HOOK2,EIF5A,ZNF787,HSD17B10,DNMT1,COA7,USP39,COX8A,SON,NCBP3,HNRNPM,OCLN,PPM1G,ANKMY2,OSBPL1A,PALM2-AKAP2,LDHD,NME7,TMOD1,OCIAD2,HNRNPA0,PABPC4,ATPAF2,ZNF638,HMGN5,MGA,RRP1B,GPATCH4,NSD2,CAMSAP1,SAMD1,NSUN4,RASA1,RPS25,FAM177A1,COMMD10,PPP1R9A,KIAA1671,AQR,DBR1,MED23,NUP85,UTP3,ZC3H6,SNRNP200,PHF6,…
0.00296090371111185	ISY1,ZNF830,AQR,EXOSC9	PUM1,ISY1,PLAT,NONO,PLRG1,LCMT1,SSC5D,VBP1,PHB2,WASF2,SMU1,CHERP,POLR2H,RPAP3,TTN,QSOX1,RBM22,NDUFAF3,TAF5L,HSF1,CALML3,SRSF9,UBE2M,U2AF1,PNPLA2,NLE1,NR2C2AP,U2SURP,AAMDC,MRPS25,PUS1,MRRF,SMC4,ALDH1A3,IGF2,ZNF830,NEO1,AQR,GRB2,PRPF4,CRYL1,FKBP4,TBC1D22A,GTF3C3,PSMA1,PAPD5,ZFAND6,NUP58,VKORC1L1,MYADM,VPS72,SMAD1,RWDD4,AIMP2,EXOSC10,TONSL,SLC25A24,GPAA1,LIN54,CDC23,LUC7L2,ATXN3,GPS1,GDAP1,BABAM2,DE…
0.001339328486611	SF3B1,SART1,SF3B2,ZRSR2	PRPF6,EIF3C,MCMBP,MARK2,SNRNP70,SF3B1,SFPQ,SART1,NOLC1,IK,SUPT5H,RANBP2,PNN,SNW1,CDC73,BOD1L1,SF3B2,PI16,SON,YTHDC1,PLCD1,CCDC9,IGLL1,ELOA,HBG1,SAMD1,PPIL3,NDUFV2,NID2,BRD2,SOS1,NELFB,APOH,APOC3,ZMYM2,NAT10,DDX23,SERPINA7,NSUN4,LIN7A,NUP93,PSMD3,ALDH1L1,PPP1R12B,SNRPD2,SRP68,ARHGEF17,INTS12,ILK,MAP7D1,NR2C2,BPI,ZRSR2,ZC3H13,POLR2J,STEAP4,PPIL1,ANXA1,EIF5B,TGM2,S100B,A1BG,FBXO6,SMARCA5,HNRNPA3,LSM…
0.000331597480166071	PDLIM5,WNK1,ARRB1,U2AF2,CNN2,FN1,ZYX	ASNA1,CPSF2,CLTB,SMAD5,DOHH,UBL5,TCOF1,PRRC2C,SNRPE,EIF3C,NUP43,PPIA,ANAPC4,SEPHS1,SRFBP1,EEF1A1,PNN,RPSA,ELOA,CUTA,SPARC,CNOT7,MARK2,PDLIM5,PPIE,CCT7,EIF1B,PCNP,GDI2,NDUFA11,TXN2,CHMP2B,TMEM263,USP36,PTBP1,GATAD2A,RPA2,UBQLN1,TPRKB,ZNF787,RPE,WNK1,ATP5B,PPP1R12C,SMARCB1,NUDT16,POLR2D,ROCK1,GID8,HAUS3,SETX,ENOPH1,STARD13,FCHO2,GLRX,ENPP4,CLIP2,ARRB1,CD59,ZC3HAV1,U2AF2,AAK1,INTS12,LRRC15,NUDT9,TAX…
