# Supplementary material for: Machine learning empowers phosphoproteome prediction in cancers
Source: Oxford University Press journal article supplement (doi:10.1093/bioinformatics/btz639), 2019-08-12
Supplement: btz639_supplementary_data.zip [file btz639_supplementary_data.zip › top_ovary.tsv]

0.00263841569633492	ABI1,NCKAP1,EPS8L2,TIMM50,MKI67	AP2A2,MPV17,GOLGB1,SNRNP200,SELENOH,GMPPA,TXLNA,TMED3,SRSF6,SPATS2L,TOMM34,APRT,IPO7,TRAM1,FLOT2,EIF3I,TMEM205,ABI1,KIF11,RPS5,COX6B1,NCKAP1,SSR1,APLP2,EPPK1,DDX17,MAP2K2,EIF5B,HPCAL1,PPP6R1,REEP5,CHI3L1,DNPH1,RPIA,EPS8L2,TIMM50,GBE1,ITIH4,FNBP1L,ESD,TRNT1,STX6,SARS2,OPLAH,TSR1,SLC16A1,C16orf62,C4B,TOP2A,IPO4,MKI67,PHF5A,RNF40,HSD17B12,GORASP2,NDUFA9,RARRES2,RMDN1,PAPSS1,SMARCB1,IFIT2,SERPINB1,PA…
0.00239770003450556	RUVBL2,SLC25A11,TUBGCP2,RCC1,RUVBL1,TWF2,RPS27,CAND1,LARP7,TARDBP,UBE3A	C3,C4B,KLKB1,HBG1,PROS1,ITIH4,MAP1S,PSME1,PSMB1,EEFSEC,GON7,GPC1,SDHA,KRT23,TPP2,C5,ATP5J,TPD52,CPT2,SERPINA6,ARPC1A,B2M,CRIP1,RUVBL2,SLC25A11,C8B,NAE1,RIPK1,DNASE2,TFAM,TNFAIP2,UQCRC2,CLDN3,ATPIF1,IGFBP7,TUBGCP2,RCC1,GOLIM4,DCTN3,CSDE1,DFFA,SEC23B,C4BPA,PMPCA,CMPK2,PARP14,STX6,GALNT7,RUVBL1,TNPO1,CRYAB,ARMC1,PICALM,IFIT3,ZNF622,C9,PRMT1,WDR33,ALDH7A1,ENDOD1,ACAA1,SEC61B,GLDC,GNS,BRIX1,AMBP,FTH1,…
0.00130303329113586	ADD3,ADD1,LAMP1	CWF19L1,TMX1,SNRPC,ADD3,PRKAA1,PSMA2,DNAJC9,TRIM28,PEBP1,ADD1,TUBG1,CIB1,PDAP1,SARNP,PRKAR2A,HBS1L,SDCBP,SORD,RPS23,GRK2,MGEA5,CSK,TRIR,TSPAN14,WDFY1,PBRM1,FAM114A2,EML4,PPP4R3A,SUSD2,PKP4,EXOC2,BAG6,ST14,ITIH3,PSME1,CFB,RPA2,PSMC6,OPA1,SKP1,LRRFIP1,LIG3,GALM,DSG2,C5orf51,GPI,RNPS1,DSP,AEBP1,RFC1,HMGN1,FUT8,ENG,HGS,RPS19,TIMP1,LMNB1,EDF1,TLDC1,CRIP1,ACIN1,UPF2,SH3BP1,CCAR2,ATP2B4,USP48,BCAT2,KRT1…
0.00908956735432602	ADD3,ADD1,LAMP1	CWF19L1,TMX1,SNRPC,ADD3,PRKAA1,PSMA2,DNAJC9,TRIM28,PEBP1,ADD1,TUBG1,CIB1,PDAP1,SARNP,PRKAR2A,HBS1L,SDCBP,SORD,RPS23,GRK2,MGEA5,CSK,TRIR,TSPAN14,WDFY1,PBRM1,FAM114A2,EML4,PPP4R3A,SUSD2,PKP4,EXOC2,BAG6,ST14,ITIH3,PSME1,CFB,RPA2,PSMC6,OPA1,SKP1,LRRFIP1,LIG3,GALM,DSG2,C5orf51,GPI,RNPS1,DSP,AEBP1,RFC1,HMGN1,FUT8,ENG,HGS,RPS19,TIMP1,LMNB1,EDF1,TLDC1,CRIP1,ACIN1,UPF2,SH3BP1,CCAR2,ATP2B4,USP48,BCAT2,KRT1…
0.00182276550940492	CHD3,ITIH1,CFH,APP,RANBP2,ST13,HPX	RARS2,TSNAX,ATP13A1,APOL1,ATXN10,GDI1,HBS1L,DAZAP1,SH3BP1,DDX39A,TBC1D9B,BLVRB,TPM3,LLGL1,DUSP3,CHD3,TECR,TSN,ALDH1L2,ITIH1,TUBGCP3,PACSIN2,NHP2,HIST1H1A,SNRPA,CD151,SERPIND1,SNRPA1,TF,TPR,BCL2L13,VPS26A,ACAT1,HNRNPLL,CFH,RRS1,SRP14,APP,EHD3,RPL13A,SPTA1,RPL24,DHCR7,FTH1,GATD1,PAWR,SFXN3,ATP6V1E1,EXOSC8,DNAJC11,PI4KA,CAT,HSPA14,PLEKHO2,PRKCSH,SUPT5H,SERBP1,LIMS1,ARHGAP18,MRPL4,RPA2,PIP4K2A,RANBP2…
0.000832430585681856	KIF11,PPP2R1A,TRIM25	ERP29,PRSS1,HIP1,NUP43,TMSB10,SOX17,ERP44,NAXD,PYM1,EPCAM,KIF11,HMGB1,GRB7,RPF2,CAPG,OLFML1,IGFBP7,CLIC1,CRABP2,RAB8B,PPP2R1A,YBX1,LMNB1,PTGFRN,ASCC3,DENR,NUDT5,CARHSP1,PPIG,TCEA1,HMGA1,HNRNPA2B1,KRT17,PABPC1,COL1A1,PCNT,SRSF9,CAT,DRAP1,EMC7,RBMXL1,SCYL2,UTRN,DYNC1I2,RPS16,PTPRA,POTEF,DPT,POLDIP3,ACTR10,PAK4,ARL6IP1,MAT2A,CLCC1,RPS15,KARS,SAMD4B,NAE1,COL14A1,DAG1,LMAN1,FBLIM1,CCT7,AP2A1,SP1,ERMP1…
0.000832430585681856	APOD,APOA2,ALB	APOD,GC,APOA4,AKR7A2,AZGP1,APOA2,ZMYND8,SERPINC1,HRG,UTP3,TTR,LEMD3,SERPING1,APOH,C8A,CFH,PPIA,MYO18A,C7,ALB,RARS2,SREK1,APOC1,PRPF40A,GRB7,RBMX,RPLP2,VCP,RBP4,PRKAR2A,SSR4,FASN,SEC24A,ECHDC1,TRIM56,CRYZ,IPO5,VPS28,ARHGEF6,TWF1,MFAP5,HDHD3,KDM1A,RBM15,DCAF8,GOSR1,CA1,GNA13,WDR82,PDLIM7,PPAT,PPM1F,CHMP2B,SLC1A5,SMARCC1,GPC4,PRPSAP2,CTSS,SEC23IP,MCM7,RPLP1,CHD3,RHOT2,CHD4,RBM4B,EXOSC10,ARPC3,TP53BP…
0.00510804944096897	PCBP1,ARHGAP4	PSME1,CPXM1,PCBP1,ARHGAP4,LMOD1,PPIA,AP2A1,SHMT2,STAMBP,ETFDH,KLKB1,GPC1,ZC3H14,ERP29,PSMA5,HIST2H3A,EIF4H,CDS2,VAT1,SPTLC1,SORT1,EIF4B,YKT6,WARS,TBCB,TOP2A,CCT6A,ANXA6,HNRNPF,GOLGA2,KRT18,PDCD6,PDE12,PRKAR2B,RTKN,HSP90AA1,BAZ1B,SNRPC,AFM,AGO1,C1QB,S100A9,PPP2R2A,TF,SLC12A7,TNXB,PDIA2,HKDC1,BAG5,STX7,MPRIP,GNB4,H2AFY,SLIRP,CALR,F9,C9,OLFML3,PARP1,TTC37,NOP10,SERPINF2,GNPNAT1,PDLIM7,CKB,CAPNS1,TNF…
0.00510804944096897	ARHGAP4,PCBP1	ARHGAP4,PSME1,CWF19L1,CDV3,GPC1,XPNPEP1,ANXA11,CPXM1,PDIA2,WARS,VPS26A,PI4K2A,SCAMP3,PSME2,LUM,PLEK,PKN2,HIP1,UCHL1,PCBP1,RAB8A,TMX1,EIF5A,RABL6,RARRES2,RBP4,PDCD6,PPIL1,BAG2,HMGB1,AATF,CALR,PPIA,HLA-DPA1,SUPT5H,PIP4K2C,GSTO1,ARF4,SCLY,SCO1,USMG5,ERP29,RTN4,PPIH,ERLIN2,SEPT8,PPM1G,RECQL,ARHGDIA,KCMF1,HLA-B,CAND2,SRGAP2,DDAH2,MTCH2,CPPED1,AGRN,PRPF6,CUL4A,RPF2,HKDC1,GDI1,RAB7A,GIGYF2,AP3D1,MFN2,PO…
0.00191225877593423	CAND1,HNRNPL,CHORDC1	PSMA5,SERBP1,RPL21,ZRANB2,STRN3,NUDT4,RAN,HMGB1,LGALS3,PSMA1,NASP,TRIR,ECHDC1,RPL19,FAM213A,SAP30BP,A2M,AFDN,DERA,CRIP2,HMGB2,PSMD6,PSMB8,RANBP1,YY1,OSBP,RPS25,ITIH2,RCN1,ANP32A,APOC3,RPL8,FUBP1,PPIF,RPL7A,CAND1,SUMO1,DAP3,PROS1,BCAM,NOLC1,CFI,FOLR1,PSMA7,CMPK1,RPS14,RPS15,NIT2,DSTN,TRA2B,FABP4,HBS1L,PFKP,PC,PGM5,SARNP,GBA,HMGB3,TIMP1,PTPN1,RBM25,PCM1,EDF1,ZC3HAV1L,TMA7,CST3,SNRPG,ATP2B1,GTF2I,DC…
0.000259283669399092	SHC1,GRB2,PSMC2,PSMC5,CAD,UBR5,XPO1,PSMD12,PC,SMARCA4	CKB,GSTM2,AKR7A2,HIST1H1B,AGO1,SERPINH1,MAP4,PRKAR2A,PFKL,CSK,COMMD4,PRKCD,SHC1,ARMT1,MARK3,NME3,GRB2,GNG12,PSMC2,STAT1,PSMC5,CAD,PRCP,FKBP10,RAD23A,DNAJC8,RPS16,ITGB4,PCYOX1,SEC63,PGD,RBM27,LHPP,SUPV3L1,ACOX1,BABAM1,UBE3C,UACA,PPP1CB,CYB5A,UBR5,AP1M2,DDX21,ABCE1,AP3D1,XPO1,UPF1,VTA1,NIT2,PPP1R21,ARHGAP35,MOGS,ARFIP1,NOLC1,SLC25A10,NEK9,HBS1L,HK1,CTNNA1,GTPBP1,RPAP3,RPL37A,NAT10,PSMD12,GALM,SCAF4…
0.00587402308509794	ACTN1,CALD1,EPB41L2,LIMA1	LPP,TPM4,MFAP2,LTBP2,ACTN1,ZYX,FBN1,CALD1,MAP4,SF3B6,CDC5L,AASDHPPT,PDLIM5,TPM1,TAGLN,MYH10,FKBP1A,SLC3A2,RIF1,ZC3H11A,CLUH,COL5A2,NCBP1,ATAD1,TRIM33,CILP,GCA,DYNLL1,TGFB1I1,SEPT8,POTEF,POSTN,EIF4A3,ALDH1B1,MPRIP,PRPF38B,MYADM,FHL3,PLIN3,SNX18,TXN2,MYO1D,EPB41L2,MYL9,CCT7,TMEM33,UBE2V2,INTS1,ILK,ILVBL,C1S,HNRNPC,CDC23,PDCD11,HIST1H1D,LRP1,GGA1,HEATR1,LIMA1,H2AFX,TRIP10,CAVIN3,EHD4,ARCN1,SMARCA5,P…
0.00903211381277368	LDHA,ACAA1,ALDH7A1,MTA1,GRPEL1,PRDX1	PSMA4,LDHA,CRIP2,PSMA1,EIF5A,PSMD10,HSP90AA1,GMPR,YWHAZ,KLKB1,ECHDC1,PRKAR2A,PEBP1,ATXN3,AKR7A2,NIT2,SKP1,FECH,HPRT1,PAPOLA,PDCD6IP,KDELC2,CLPP,PEF1,ACAA1,ZRANB2,AGK,XAB2,ATP2B4,TNFAIP2,CWF19L1,RAB3GAP1,TXN,PNP,VPS29,SELENBP1,IAH1,DNM1L,RCN1,CCDC50,PSME1,VAT1,RBBP4,ERP29,F12,GRB7,POTEF,USP8,CD109,MARK3,STRIP1,PPP4R2,PSMB1,HIST2H3A,RBM42,RANBP2,SNRPC,PEX11B,ALDH7A1,MTA1,COPS6,MAP2K2,URB2,VDAC3,ELO…
0.0014513989676839	HNRNPR,CCDC6,CD2AP,CSNK2A1,CDK1	CDS2,NOC2L,LAD1,ITGB5,B2M,GPI,MFAP1,RAC2,PUF60,RAVER1,ALDH16A1,SELENBP1,FKBP3,MAIP1,PDIA5,TMX4,DUSP3,CPNE1,HNRNPR,THBS2,HNRNPH3,TRNT1,CMPK2,SH3BP1,EIF2B1,MAP7D1,CAND2,DDX52,PWP2,TPD52,NDUFAF4,LAMB3,CAST,PARK7,CCT7,ACLY,ATP2A2,CCDC6,EHD4,ABCF2,RBMXL1,ZC3H11A,CPSF6,NLRX1,IFI16,TNPO1,PGP,CD2AP,CD74,ERH,PHIP,RPL10,ARL6IP1,DCTN4,NCF1,IVD,ARIH1,HSPH1,RABL6,AK3,ME2,ZW10,ARPC5L,NSDHL,POLR2A,GALNT1,PPP2R5…
0.0059670356216558	HNRNPU,RPL8,RPS6	SNW1,SRSF1,HNRNPU,GAR1,SNRPB2,CSNK2B,TFAM,CHTOP,SOX17,RPL5,HNRNPA2B1,SNRPD2,RPL8,AP2S1,WDR70,SUPT5H,TNC,NUP153,RPS3A,SNRPC,SNU13,YY1,SNRPD1,TRA2B,TRMT1,NECAP2,CSNK2A1,DRAP1,SRP14,THOC6,HSPA4,ANP32E,CAT,RPA3,RPS17,SF3A1,DDX46,DDX23,FBLN2,HDGF,DNAJC9,FBLN1,ZFR,FTL,POTEI,MXRA5,RPL21,KANK2,CDK1,ELAVL1,TOP1,SRSF3,COQ8A,RPS12,BST1,ALYREF,RPS6,COQ9,DDX52,KRT17,LUC7L3,ERI3,MESD,TXNL1,VARS,DHRS7,HARS2,ACS…
0.00510804944096897	CDS2,PTRH2	DSCR3,EDC3,FKBP1A,KRT17,VPS36,RAB2A,LAMTOR3,TLDC1,COMP,FEN1,RABGAP1,GSK3B,LAMP1,C16orf62,KIDINS220,FNTA,EIF5,TNPO2,ITGB2,PRKAA1,RAB4A,LARP7,RAN,YARS2,NOSIP,ARPC4,HECTD1,DSP,RBM8A,PTGFRN,NELFB,NACC1,HOOK1,DECR1,NDRG3,ANXA5,PSMD1,SNW1,CDS2,ARRB1,ANP32B,CRIP2,PPIG,PPIF,HNRNPAB,NIPSNAP1,AKAP8,NHP2,MRPS23,RAP1A,CPT2,GMPR,PLBD2,PPP4R2,DHRS4,EMILIN2,SCARB2,PRPF19,MTA1,ACADVL,SCFD1,GRSF1,FAM50A,GNAS,SH3G…
4.05219061795368e-06	NUMA1,USP39,PGAM5,RPS12,KRT17,BAZ1B,SARNP,YBX1,RPS18,RAD21,DDX42,PRPF8,STAU1,PSME1,SMARCA5,RPL17,LTF,TOP1,HSP90AB1,EPRS,RPL15,RPL6,RBM28,ALYREF,CTBP1,SMC3,HSD17B10,ADNP,CSE1L,EEF1A1	GNG5,RALY,DRAP1,BIRC6,NT5E,DAXX,VBP1,NUMA1,NASP,TIMP1,PITPNA,USP39,MAP2K2,FEN1,PGAM5,CST3,CRABP2,ATPAF1,CLUH,OLFML3,SMC2,RANBP1,RPS12,PFDN5,PNN,KRT17,BAZ1B,UBAP2L,SARNP,YBX1,RPS18,SGTA,SUN2,RAD21,CAPG,ATP6V0A1,DDX42,PRPF8,STAU1,PARD6B,PPP1R10,PSME1,SMARCA5,GLIPR2,RPL17,ANP32A,LTF,EIF2B1,TOP1,CDK1,HSP90AB1,MTHFD2,EPRS,RPL15,LAMTOR3,ANP32E,RPL6,POR,GLUD1,RBM28,ALYREF,DCTN6,SH3GL1,CTBP1,EXOSC5,WRNIP…
0.00304596754933676	TALDO1,PDCD6IP,CHMP4A,RBBP7	WT1,WDR77,EIF2B3,PACSIN2,RAB10,TLDC1,MYH14,F13A1,PGM1,EXOSC5,AP2A2,MRPS27,ELAVL1,TPD52,AMBP,ANXA1,DOCK2,RBM28,LARP4B,LAMTOR3,BAZ1B,MYH11,GATM,HLA-DRA,TALDO1,RTKN,C21orf33,LAMP2,DNAJC11,TMSB4X,MRC1,PDCD6IP,MRPS25,SSRP1,CNP,PFDN5,GSN,OXSR1,TXNL1,MRPL46,SSSCA1,LDHA,RNF114,MRPL15,FLOT2,IDUA,RPL14,EBNA1BP2,ESD,CCT2,TIMP1,RP2,COX4I1,PICALM,GOLGA2,HIST1H1B,SEPHS1,NDUFA4,ERLIN2,GPI,MATN2,RRP1B,MAP2K4,SLC…
0.00304596754933676	TALDO1,PDCD6IP,CHMP4A,RBBP7	WT1,WDR77,EIF2B3,PACSIN2,RAB10,TLDC1,MYH14,F13A1,PGM1,EXOSC5,AP2A2,MRPS27,ELAVL1,TPD52,AMBP,ANXA1,DOCK2,RBM28,LARP4B,LAMTOR3,BAZ1B,MYH11,GATM,HLA-DRA,TALDO1,RTKN,C21orf33,LAMP2,DNAJC11,TMSB4X,MRC1,PDCD6IP,MRPS25,SSRP1,CNP,PFDN5,GSN,OXSR1,TXNL1,MRPL46,SSSCA1,LDHA,RNF114,MRPL15,FLOT2,IDUA,RPL14,EBNA1BP2,ESD,CCT2,TIMP1,RP2,COX4I1,PICALM,GOLGA2,HIST1H1B,SEPHS1,NDUFA4,ERLIN2,GPI,MATN2,RRP1B,MAP2K4,SLC…
0.00363838394032904	GPI,MFAP1,ERH,STMN1	CRIP1,IRGQ,TBC1D4,B2M,GPI,MFAP1,FKBP3,CMPK2,LBR,SNRNP200,RAVER1,PDIA5,G3BP2,NOC2L,RBBP7,LRP1,ERH,CD74,PSMC1,METTL26,CDS2,STMN1,RNASE1,NDUFA5,ACAT1,NUDT5,HM13,ITGB5,ATP1B1,LARP4B,SEPT11,MRPS28,VPS36,ARFGAP1,HIST1H1A,EPPK1,EMC1,MPV17,IFIT2,IFI30,HMGB3,SUN2,CHID1,EIF2B1,AGT,UBR4,SSBP1,GOLGB1,RAB34,TOR1AIP1,HEXA,SP100,FIS1,CORO7,USP14,RPS28,LAD1,VDAC2,BCAT1,FHL2,FIP1L1,LTF,RBP4,UFL1,VBP1,KIAA1468,RTC…
0.00837175339537143	STRN3,HECTD1,RPL3,CTNNB1,CTNNA1,THRAP3,RPL12,EIF6,SEC24B,TRIM33,MYL6,EIF4A3,CUL3,USP15,AHCY,NUP98,NUP214,RPS27,PDLIM5,TMPO	STRN3,HECTD1,OSTF1,LSM8,LZIC,FKBP15,ENO1,ANXA7,TFAM,RPL3,LSM14A,CTNNB1,TBC1D5,CTNNA1,THRAP3,GOLIM4,RPE,C4BPA,PFDN6,GALK1,RBM27,RAB31,VAV1,RPL12,CSNK2B,TBC1D9B,EIF6,MMP14,PSMD14,CD74,AP1S1,ARIH1,PLOD2,APLP2,ARL1,TPR,VWF,SEC24B,DES,EPS15L1,HERC4,ITIH3,NUCKS1,MARK3,ADGRE5,PHF6,MYO18A,CMAS,HNRNPH3,TRIM33,SORBS1,CARMIL1,EFL1,CILP,CCAR2,MSI2,MAP2K1,FDPS,YWHAB,DRG2,MYL6,QDPR,ZMYND8,RAB5A,KRT17,EIF4A3,HN…
0.00263841569633492	CTNND1,CDH1,CTNNA1,APP,CTNNB1	RBMXL1,RNPS1,SOX17,CTNND1,CDH1,SRSF1,CSNK2B,SRSF11,ECHDC1,RAN,XPNPEP1,RPS16,STOM,SRSF3,HNRNPH3,SUPT16H,SARNP,DHX15,CTNNA1,RPS3,OSTF1,ZC3H14,DSG2,NUP43,AFDN,CSK,SSRP1,TMSB10,RPS3A,DBT,PPIF,PIP4K2A,HMGN1,MRPL1,EPB41L1,DPT,HDLBP,MAN2A1,PECAM1,HMBS,SCRIB,PRSS1,HNRNPD,TWF1,RTN3,ABHD10,PELP1,FAM114A2,RBM27,ARFGAP3,NT5DC1,SNRPA1,SNW1,SNX9,ZRANB2,WDR43,AATF,TMSB4X,RENBP,TPD52,C5orf51,BRK1,PCNP,SPARC,REXO…
0.00200935106571458	DEK,DAXX,CHMP4B,SMARCA5,NCL,CSNK2A1,SUPT16H	CSNK2B,RBM39,RNPS1,DEK,HMGN1,DAXX,PTBP1,RPL8,SOX17,APOB,A2M,STOML2,VBP1,NAXE,DNPH1,PCNA,SNRPG,SMC1A,SRRT,RBBP4,RPL35,MAT2A,KRT17,DRG1,SUPV3L1,ADAM17,TXNDC17,UBXN7,MAT2B,PRTN3,CHMP4B,SMARCA5,RANBP1,SNRPB2,TIMP1,DES,NCL,ZC3H15,STOM,HNRNPAB,MAPK14,YBX1,HMGB3,GSK3B,AMBP,PUF60,SNRPD2,MFAP1,SF3A1,SRSF6,NSMCE4A,DDX21,BRD4,OSTF1,DPT,NDRG3,ASPN,PNPT1,EPB41L1,HLA-B,RHOC,XPOT,OGFR,COASY,ACTR3,AP2S1,MRPL46,M…
0.00504842541052256	DDX5,LRSAM1,UBE3A,CAMK2D	RBM27,CAPS,TRA2A,FBXO21,SDCBP,DDX5,USP39,EIF5,QPRT,LRSAM1,GNPAT,CDV3,EPS15,LEMD3,RAP2B,GALK1,GSTO1,DNAJC3,PGAM5,RPS16,DHCR7,CASP8,CA1,TUBB,UBE3A,TMED10,SFXN3,CTSD,RPL13A,NAXD,CSTF3,SMU1,NOLC1,EFTUD2,SORT1,NIT2,ARHGAP18,HMBS,ERP44,IDE,CD74,TRMT112,ALDH18A1,SLC44A1,HBB,RRAS,IMPDH2,CAP1,ARPC3,CAMK2D,NPC2,SNRPC,H2AFX,ITGAX,NFKB1,MYEF2,NUP88,APEH,FKBP3,SPR,COG2,SNX4,RABGAP1,MKI67,COX2,IL4I1,PSMA2,SNRN…
0.000832430585681856	DLGAP4,TRIM25,SORBS2	TOP2A,CDK1,NCAPD2,HSPA9,CSE1L,RBM39,EIF5B,CWF19L1,MAPRE1,BCAS2,HSPA8,DLGAP4,HSPA4,TOLLIP,ERP29,MKI67,DDX46,PURA,TMCO1,MPST,SMC4,RFC5,PPP2R1A,TOP1,PCBP2,RBM12,AGO2,MCM4,NDRG3,ST14,EIF4B,RRAS,EIF4G1,MRPS22,RPS28,MRPS28,PNPT1,MARC2,ECH1,NASP,LMNA,SMC2,KDM3B,CLEC3B,HEBP1,VPS33A,KIF11,PDIA2,FIBP,TNPO3,TRIM25,KARS,DYNC1LI1,PAPSS1,MECP2,MDK,NUP62,AKT1,SRSF9,TSTD1,RPTOR,ETFDH,TMPO,DNAJC8,STMN1,BAG6,CP,LT…
0.00263841569633492	CDK2,DOCK7,VCP,YWHAZ,ARPC3	CDK2,GALNS,DOCK7,METTL7A,EIF4G1,IGFBP2,RPL19,RPL4,NSUN2,PKN2,RTKN,EMILIN1,NUDT5,ELOC,RPS15,NEK9,GNG5,ARL6IP1,SRSF11,ZRANB2,EIF3H,COL14A1,BSDC1,LAMA3,CFB,RPS5,PTGR2,FAF2,APEH,GLDC,HNRNPAB,ELOVL1,TWF2,MARC2,PDP1,COL6A2,VCP,DHRS1,PFDN2,TSN,IPO11,PRCP,EIF3L,PPIA,ACTR2,CSNK2A1,PTPN12,TUBGCP2,COPS5,PEF1,DYNC1LI1,KCMF1,THRAP3,CSK,TMSB10,YWHAZ,HSPA12A,PRKCD,FABP5,FRMD8,HECTD1,NRBP1,RALGAPB,RBBP4,NDUFS3,P…
0.00743116892100929	RAC1,EXOSC5,DOCK7	STMN1,EEF1D,FKBP4,RPL14,SMNDC1,LNPEP,EMC1,ACAA1,SVIL,SNTB1,FBP1,RAC1,MRPL4,SCO1,NPC2,UBA6,CCT6A,CHMP1A,SF3B6,HMGCL,CKAP5,PPP1R7,MVP,ECHDC1,MYO1E,FOLR2,PARD3,KHDRBS1,CLASP2,UFL1,UBE2M,SELENBP1,MRPS25,SUCLA2,NUP85,DIAPH2,SAP18,HADHB,BMP2K,YKT6,SNRNP200,MYO1C,EIF4H,NOL9,H2AFY2,CLASP1,GARS,INF2,FBN2,ARFGEF1,ARMCX3,CPSF6,SAFB,CACYBP,WASF2,DPM1,UBQLN2,CAPG,ARHGAP35,KRT5,SERPINB9,KRT7,ELAVL1,CYB5B,PHB,P…
0.00587402308509794	DSG2,PKP2,JUP,DSC2	DSG2,PKP2,JUP,DSP,SP1,DDX1,FAM114A2,HMGN1,DSC2,RPS6KA3,PICALM,RBMXL1,KTN1,SFN,FBXO21,SLC39A14,PRPSAP1,HBS1L,TRIP6,C8G,DHX15,NIF3L1,IARS,WRNIP1,GPS1,SNAP23,STIM1,PPP4R3B,MRRF,GMPR,CHMP1A,ABHD10,VPS4A,NES,FEN1,KRT17,THBS2,STXBP3,HSPA8,ETHE1,MOV10,CUL4A,PEBP1,MPI,SH3GLB2,SNRPC,ARMC1,SNRPE,TES,SUN1,HDLBP,MAP2K4,LANCL1,PFKL,PLXNB2,SBF1,RAB31,NACC1,GPI,GLRX5,ANXA3,NNMT,ARID1A,POLB,FIBP,MUC1,MCMBP,OCIAD…
0.00587402308509794	CANX,MYO18A,MYH9,PKP2	CKB,GOLIM4,DNAJB1,C2,CANX,GGCT,NIF3L1,COL3A1,PRDX6,ACTG1,SCAF11,FBLN1,GLS,DNAJC3,IKBIP,KRT19,GBE1,MTA1,ACTR10,DDX23,SMYD3,TSN,PPP1CB,PTGES3,USP8,AIP,RPA2,ALDH4A1,DUSP3,ACSS1,SPARC,AIFM1,PPP4R2,ABAT,ADPRHL2,ALDH1L2,ALCAM,ZC3H14,AHCYL1,SLC27A1,HTRA1,HMGCL,CLEC3B,BABAM1,TACSTD2,PTMA,MYO18A,DCAF8,TIMM10,GOPC,APEX1,AHCY,YY1,MYH9,BAG6,LAMB2,PDLIM3,CDC5L,PKP2,SUCLG1,PPIG,SUPV3L1,SAFB,DDOST,PSPC1,C1R,HNR…
0.00198046499138357	EPB41L1,PSMA5,NOP16,HNRNPUL1,COPS3	SLC25A3,KRT19,COQ8A,EPB41L1,HIP1,DYNLL1,TPD52,MYH10,HMGN2,IDH1,EHHADH,ND4,TMA7,PPP4R2,P3H4,NPC2,COL3A1,WDFY1,RASA1,AP1G1,SIRT5,OLFML3,GMPS,UGDH,ZC3H14,ACOX1,RPA2,PARN,FIS1,RRS1,PSMA5,ECI1,TALDO1,C8G,C8orf82,NOP16,PCNP,HNRNPUL1,HDHD3,DAG1,NDRG3,AMPD2,PTGIS,PRKCD,AP3B1,YLPM1,ATP6V0A1,LXN,TMSB10,PPP1R21,OXCT1,GLRX5,ME2,MRC2,PON2,C1orf123,HBD,ALDH6A1,BLVRA,CD109,YWHAG,DLD,DNAJC9,GALE,MRPL41,ABCE1,YWH…
0.00304596754933676	LYN,EVL,SPTAN1,VASP	CORO1C,RAC2,ATG7,EPS15,MBNL1,COLGALT1,CD163,ARPC5,ETHE1,ARPC4,MAN2A1,GTF3C3,MYDGF,CUL4B,LYN,PFN1,MYO1F,DPYD,DYNLRB1,TBCD,STK10,ARHGAP45,PAPSS1,UGP2,WBP11,RANGAP1,PSMB4,HSPH1,TNXB,ATP6V1B2,SNTB2,DIS3L2,XPO5,TMED4,ARPC1B,FUBP3,STX12,LSP1,WASHC5,XPOT,TYMP,NIPSNAP1,ACTR10,ITGB2,SPTBN1,RAD23A,MTDH,CAPS,STX6,SRGAP2,EVL,GCC2,ITGAM,BPTF,AMBP,PSMC1,CA1,ATP13A1,ARPC1A,CD63,EEF1B2,LNPEP,LGALS3,CPPED1,IFI30,…
0.00132797581287245	CSNK1A1,LGALS3BP,ELAVL1,LYAR	TNFAIP2,AKR1C3,CLDN3,ABHD11,CYC1,TMED9,NDUFB5,THEM6,PUS1,PYCR3,TMOD1,PIN1,OLFML3,PKP3,GNPNAT1,MUC16,NME2,SDAD1,HTRA2,NDUFA8,MDH2,SNRPC,EIF2S3,PRRC2A,CSNK1A1,ITIH1,SOX17,GRPEL1,OGN,TUBGCP2,NDUFB4,ATP6V0A1,VAMP7,STK3,OLFML1,MROH1,DOHH,PLD3,PCYOX1,PSMD3,KIAA1217,ARF6,G3BP2,S100A16,CLINT1,HDHD3,GOT2,PLG,ANXA4,GSDMD,LETM1,LXN,RHOC,PPIF,YWHAZ,LGALS3BP,GRSF1,ZNF185,PTK2,EPS8L2,TNXB,ALDH18A1,GSTM2,ADSL,A…
0.00743116892100929	FGA,FGG,FGB	FGA,CA2,FGG,FGB,C4BPA,NDUFS7,PROS1,ACTBL2,PLOD2,MSI2,RPL28,ITIH3,ATOX1,RPL8,RPL37,AKAP9,PRNP,PHF6,PDS5B,HDHD2,NHP2,LSM6,RPL38,ANP32A,UBE3C,ELP3,NUCKS1,DDX1,PFN2,COPS3,CRYAB,MPO,RBM14,LSM2,LAS1L,CNBP,GBE1,HBD,SNTB1,PCCB,ARRB1,SLC25A22,UBR4,P4HA2,HOOK3,SUMO1,SLC39A14,FLOT2,AKR1B1,SF3B3,CD46,ARPC2,SEC24B,PRKCA,SELENOF,VPS16,EXOC3,ACAD10,CTSG,LRRC47,STUB1,PPP6R1,RAB2A,GCLM,RPL10,MRPL49,SH3BP1,DSG2,SL…
0.00743116892100929	FGA,FGG,FGB	SAP18,FGA,DBR1,KLK6,FBN2,ORM1,SLC4A1,NDRG2,PROS1,APOD,ARFGEF1,PRPF31,FGG,APOC1,SRP54,BIRC6,H1F0,NDUFS2,APOC3,PSMB5,MYO18A,AAK1,BZW2,NFXL1,WDR18,EPN1,FGB,MYO1E,KIF13B,UBE4B,ACIN1,PSMD14,CLU,RPL27A,PSMA7,GIT1,PCNP,RAB3GAP1,SFPQ,AARS2,SERPING1,LRG1,FAH,CDK5RAP3,ARPC3,APAF1,THOC2,TST,TJP2,PPP6C,NBN,CCNY,RACK1,AP1S1,EFL1,EEF1A1,SRP72,STX12,ACTBL2,DCTN3,SMU1,MACROD1,HDLBP,TTR,CDC42BPB,C5orf51,AIF1L,MES…
0.00743116892100929	FGA,FGG,FGB	RBMX,DDX17,PLOD2,ADAR,TMPO,SLC16A3,SRSF9,PBRM1,FGA,PEBP1,REXO2,DBNL,PNPT1,RSF1,SNRPD2,PROS1,TMX2,SART3,NEK7,FLNC,SRSF10,RPL8,ANP32B,TRA2B,ISCU,PRTN3,PRKACA,SEPT8,SMC1A,SNTB1,FGG,PFN2,TFAM,SNRNP70,MYDGF,HSD17B10,WDR1,C4BPA,P4HA2,NAP1L1,TDRD7,MARC2,BAG5,TMCO1,CLPX,ARFGEF1,CYFIP1,PTGES3,GLYR1,MRTO4,HNRNPA1,HSDL2,RPL21,CHMP5,YARS2,TSPO,NT5C,POR,YIPF5,NUDT2,DHTKD1,MEMO1,PDIA3,APRT,M6PR,NAXE,RBM10,SNRP…
0.00561849759007741	TPM2,PALLD,TPM1,ACTG1,FN1,CORO1C,MYH9,FBLIM1,MYO18A,FLNA,DCN	MYL9,TPM2,PDLIM3,PALLD,CALD1,TPM1,CNN2,TGFB1I1,ACTG1,SORBS1,FN1,FBLN2,VCAN,FBLN1,THBS2,PFAS,MXRA5,RNPS1,C1S,FAP,CORO1C,ZYX,MYH9,FBLIM1,MYO18A,CNN1,ENTPD1,PDLIM2,ISLR,EIF4A3,PDLIM5,DUSP3,MMP2,TUBB,PAFAH1B3,CWC15,PLXDC2,MYL6,ZC3HAV1L,TUBG1,PLS1,SYNE1,CNN3,NARS2,EIF2B3,SERPIND1,ATL3,TLN2,IK,MYO1D,RTN4,YBX1,PTER,ATP5C1,LRP1,FLNA,NPEPL1,CYB5R3,SLC29A1,NONO,AHNAK,EPN1,SORD,MSH2,PSME3,MRRF,PDXDC1,ECI1,P…
0.00561849759007741	PALLD,TPM2,FLNA,TPM4,WDR1,PDLIM7,LIMA1,SQSTM1,FN1,MYO1C,MDC1	PLXDC2,PALLD,MYO1D,PDLIM2,CNN3,UBE2L3,CNN2,TPM2,FLNA,TPM4,WDR1,VCAN,P4HA1,ITGA5,UBXN6,MYL12A,ISLR,CALD1,HLA-DPA1,FHL3,MMP2,EEFSEC,SFXN3,NNMT,EIF2B3,PDLIM7,HTRA1,FBLN2,LIMA1,SQSTM1,RBM42,DDX1,PNPT1,P3H3,P3H1,PDLIM3,MMP14,FN1,CEP170,GLB1,TGFB1I1,THOC1,PFDN1,ANPEP,ANP32B,SRP14,PMPCB,CHTOP,CDC42EP4,POLR3C,MYO1C,ACAT2,PTPN1,MYADM,CASP1,RARRES2,CNN1,CSTF3,TARDBP,CD9,CHMP4A,TMEM33,VAMP7,NMT1,HSPA4,CDC42…
0.00561849759007741	TPM4,MYH9,HSP90AB1,CAPZA1,RAI14,PFDN5,MYO1C,WDR1,ARFGEF2,EPS15,SORBS2	POTEF,CNN2,TPM4,DPYSL3,VCL,MYH9,PDLIM2,SYNE1,EIF4A3,PEA15,ZYX,CNN3,ALDH1B1,RAC1,LIMS1,MYL6,TGFB1I1,PTBP1,PIR,KANK2,PARVA,STIP1,FDXR,HSP90AB1,TNS1,MYL12A,COL11A1,XPO5,FLAD1,LUC7L3,PPFIBP1,CAPZA1,RBM4B,LASP1,PAWR,PPIL1,TAGLN2,PTGS1,SORBS1,SRP54,ACTN1,PLOD2,RAI14,PFDN5,FAM3C,TRAF6,GNPAT,RECQL,MAP4,ARHGAP18,B4GALT1,CYB5R3,MSH6,AP1M1,FERMT2,CAPRIN1,BIN1,SH3GL1,HEATR1,RBM34,PLXDC2,AGRN,UFC1,SEPT11,MTHF…
0.00620037161100885	FLNC,FN1,DCTN1,TES,MFN1	ITGB5,FLNC,PDLIM5,PDLIM2,MYL12A,TGFB1I1,FHL3,PLXDC2,MMP2,RAB31,FAP,MAIP1,RENBP,NARS2,CRTAP,NNMT,GIT2,FOXK1,MAPRE1,SEC23A,MGMT,GLRX,TUBB6,ITGA5,MACROD1,TLN1,THOC1,P3H4,LASP1,DUSP3,P3H3,FN1,IKBIP,PIR,PIP4K2A,ARHGDIB,SERPINF1,CTPS1,ALDOC,AFG3L2,MYO1B,EEF2,OGN,TM9SF4,MYO9B,DOCK2,AHCYL1,M6PR,TMOD3,CAST,SH3PXD2B,TSTD1,TPM4,DNAJA2,C14orf166,PFKM,TMEM87A,TBCA,CNPY3,NUCB1,CHTOP,ACTG1,ACAT2,UCHL5,TALDO1,SP…
0.0077851431733886	GTF3C1,C1QBP,AHSA1,RPA3	SNRPD2,ERP29,DHX15,RBBP4,SRSF3,RBM42,GTF3C1,MESD,PCNA,RAB8B,RALY,NT5E,TOP2A,KHDRBS1,HNRNPU,TNPO2,DRAP1,RRAS,TRIM33,U2AF1,SNRPA1,C1QBP,KIF11,SHMT2,FUBP1,AHSA1,SLC25A13,BUD31,SNRPB2,SAE1,RBM39,U2AF2,PRKDC,HNRNPD,HNRNPL,CAVIN1,TARDBP,HIP1,OTUB1,HMGN1,RPA3,TSFM,HSPA4,SRSF9,NCAPD2,IDH2,AFDN,TGFB1I1,SNRPC,ARAP1,AATF,LUC7L3,CSNK2B,MDK,HNRNPA2B1,PIP4K2C,S100A10,AP2S1,MYEF2,CUL3,NSUN2,NUP43,CCT4,GOLGA3,SN…
0.0059670356216558	HBA1,HBB,SLC4A1	BLVRB,HBD,HBA1,CA1,HBB,PPBP,SPTB,SLC4A1,SPTA1,ND4,HBG1,FUT8,LEMD3,HDAC2,CA2,ERP29,ADD1,FLNC,EEF1A1,CAT,INF2,COG2,PRTN3,SLC44A1,RPL38,GFM1,EXOC2,KRT7,WDR11,POTEI,SF3B4,TUBGCP3,GFM2,CPN2,H2AFX,CYP20A1,MAOB,MRPL46,RNMT,ADRM1,HSPB1,BASP1,MTHFD1L,LAMTOR3,FCGRT,SNRPG,TMSB10,RAD23A,ARPC4,RPL23,EMILIN1,FES,VPS26B,PLTP,RRAGC,PFKL,ATP2B4,SAFB,CGN,SBF1,IRF9,RPS19,DDR1,IQGAP2,SERPINH1,ITIH1,PIN1,TBCB,ARHGDIA…
0.00252307596477772	HBA1,HBB,HP,CDK2	HBD,RPL7A,HBA1,RPL21,CA2,SMARCB1,SPTB,USP24,FGA,SART1,SERPING1,RPL31,DHTKD1,PPBP,HBB,SLC27A3,SPTA1,MTOR,EPS8L2,RPS29,RPL30,FADD,RPL13,POLR3A,MIEN1,MRPL41,COPS8,C5orf51,TMEM109,HADHA,ITIH3,RPS25,SEPHS1,NUCB1,PDCD10,CST3,TMED1,RPS4X,PPP4R3B,COMMD8,PROS1,RPL17,YWHAG,A2M,CAT,RAP1GDS1,BCCIP,ELANE,SLC4A1,CTSB,CHAMP1,CCDC6,ME1,PLS1,MAT2A,EXOC1,SAP18,ACTL6A,CHMP4B,COQ5,HP,CUL2,MAP2K2,CD81,PRTN3,RASA1,USP…
0.00198046499138357	BAG6,MMS19,GNAS,B2M,HLA-B	AGO1,HSPH1,CMAS,MRPL46,SEC24B,POLR2H,EXOSC5,PSMC1,PSMB1,ARF6,COX4I1,PWP2,BYSL,GSTP1,SRM,CUL3,PSMA2,SRP72,PSMD5,BAG6,CEBPZ,AP2B1,EIF3D,SNX1,MMS19,FCHO2,GNAS,B2M,PALM2-AKAP2,LARP4B,SP1,SAR1B,FUS,LDHA,ABCC4,RPS29,RAB8B,PSMD9,SF1,RPL13,COX6B1,CHMP1A,UBA1,DNAJB1,WDR70,ERH,TBCA,REEP5,LRRC47,NDUFA5,APEX1,DHX36,ZW10,RBBP7,GFM2,PSMD10,CLDN3,LSS,HDGFL2,SLC44A1,CCT2,GOLIM4,TLDC1,UBE2M,NUDT5,RAB11B,U2SURP,EX…
1.24350886870388e-06	HNRNPL,HNRNPF,HNRNPK,GTF2I,FUS,MATR3,MCM2,HNRNPU,NCBP1,HNRNPA0,RPA3,RANBP2,HNRNPA2B1,MAGOH,TARDBP,CDC5L	SET,SMCHD1,HNRNPL,RPS27,TEX10,HNRNPF,CSTF2T,HNRNPK,GTF2I,SIN3A,RFC1,PEPD,THBS2,DDX19A,C1QB,RSL1D1,UTP4,SNRPC,PWP2,NOL9,ANP32A,LAMTOR2,LGALS1,SCO1,FUS,MATR3,MCM4,MRPS22,CNN3,ZC3H4,RPRD1B,OGT,RFC2,S100A10,MCM2,ABHD16A,CCT2,SUPT5H,GATAD2B,HNRNPU,EDF1,DNAJC7,C12orf57,MAVS,YWHAH,XPO5,SERPINB1,NCBP1,SKP1,BID,PXDN,POLR2A,HNRNPA0,FCHO2,PAK4,COL5A1,SMARCB1,RPA3,GNL3,COL12A1,SERPINF1,SFPQ,CHMP1B,RAB3GAP1,U…
6.72717356901918e-05	HNRNPF,HNRNPK,SNRPC,MATR3,MCM2,HNRNPA0,HNRNPA2B1,MAGOH,TARDBP,FAM120A	SET,SMCHD1,HNRNPL,RPS27,TEX10,HNRNPF,CSTF2T,HNRNPK,GTF2I,SIN3A,RFC1,PEPD,THBS2,DDX19A,C1QB,RSL1D1,UTP4,SNRPC,PWP2,NOL9,ANP32A,LAMTOR2,LGALS1,SCO1,FUS,MATR3,MCM4,MRPS22,CNN3,ZC3H4,RPRD1B,OGT,RFC2,S100A10,MCM2,ABHD16A,CCT2,SUPT5H,GATAD2B,HNRNPU,EDF1,DNAJC7,C12orf57,MAVS,YWHAH,XPO5,SERPINB1,NCBP1,SKP1,BID,PXDN,POLR2A,HNRNPA0,FCHO2,PAK4,COL5A1,SMARCB1,RPA3,GNL3,COL12A1,SERPINF1,SFPQ,CHMP1B,RAB3GAP1,U…
0.00992285367339081	HSP90AB1,CUL1,STIP1,FLNA,FKBP4,RPAP3,HGH1,HSF1,SAR1A,DNAJA2,RPL32,ACTG1,CDC73	HSP90AB1,SCYL2,ASPN,PLEKHO2,CAST,ALYREF,SMARCA5,LIMS1,BST1,VBP1,VCAN,FERMT2,SH3BGRL,CUL1,RBM25,SEPT8,RSU1,CSNK1A1,RRAS,PTGFRN,PARVA,UBA7,ACSL4,MYADM,RPL24,STIP1,EXOC2,TNS3,TOP1,GPX3,FLNA,VAPA,LTBP3,HOOK1,POLDIP2,HNMT,CSE1L,PPP1R14A,SELENOH,MSN,YARS2,KRT5,CRLF3,EPS15,MDK,FKBP4,MRPS5,RPAP3,TNPO1,ELANE,ACADSB,PTER,PFKM,DAB2,CHAMP1,HGH1,TMX2,ACIN1,CD2AP,RPL36,APOL2,HSF1,FAM129A,PSMB8,SAMD4B,PPP2R1A,A…
0.00200935106571458	HLA-B,CRYL1,HIP1,TUBB,ZMAT2,USP8,HTT	HLA-B,KRT17,CTSD,PNP,CRYL1,ANKRD17,RRAS,XPNPEP1,RANBP1,UBR5,ASCC3,PSMB5,EFL1,PCBP1,TSG101,KRT5,PPCS,LEMD3,LAMA3,RBBP9,HIP1,RAB21,PTP4A2,STXBP1,STRN3,TUBB,GRPEL1,NAXD,HNRNPAB,CAND2,PLS1,ILF3,NASP,ZMAT2,HSD17B4,CTSB,NUDCD1,PPID,H2AFY,PPIL1,DDX56,GSK3B,GMPPA,USP8,HARS2,PSMA2,LIMA1,NPC2,RPS14,GAK,SCRIB,TWF2,GPI,SPATS2L,CD74,MUC1,PFKP,MSLN,ENG,ATRX,AP2S1,OLA1,KIAA1217,SLC16A3,NUP210,AP1G1,NARS2,RPS6KA…
0.000170182935835679	EPRS,LARS,PFDN5,IARS,TRIM25,VBP1,PDHA1,DARS,CCT5	COL1A1,SF3B6,MTHFD2,EPRS,PDIA2,PNPT1,LARS,COL1A2,SHMT2,PFDN5,SERBP1,EIF2S2,SDAD1,EIF1AX,EIF2S3,IARS,RELA,PCBP1,RAB21,IPO11,ERLIN1,RANBP1,PDIA5,LRP1,DNAJC7,TRIM25,ARL6IP5,STOML2,EIF2S1,VBP1,ERC1,PCNA,MRC1,CHMP2B,SF3B2,LIMA1,COL5A2,TIA1,PDHA1,CCT6A,IARS2,ACOX1,UTRN,FCGRT,NSUN2,EIF5B,EIF3D,EFL1,HSPD1,TMED5,DNAJC9,KIF11,DCN,MRPS6,GALNT1,CDK1,RBM26,NOP10,DARS,RPS14,SORBS1,PSMD3,ANP32E,RRAS,RPL4,ALDH16…
0.000474252686453015	HNRNPD,RAB5A,HNRNPA1,TARDBP,IGF2BP2	SP1,FGB,EIF2S2,FGG,SEPT8,MAN2A1,OLFML3,EIF3I,EIF3E,RBMXL1,LUC7L3,CAVIN1,COMP,TRIM33,EHD2,SNTB2,CD55,FGA,ABCF3,PEBP1,ILF3,HNRNPH1,BCCIP,HNRNPD,REXO2,RAB5A,LXN,UBE2N,USMG5,PIGT,LSM8,DHX15,GLG1,HNRNPA1,EIF4B,PSMB7,CA2,ARHGAP1,SNW1,PPIH,RPS23,TARDBP,POGZ,VWF,HBD,ZC3H11A,SF3B5,HTRA2,PTGES3,PFKM,GNAQ,FBN1,HNRNPUL2,LMOD1,GOLIM4,SART3,MSI2,PAPSS1,RPL11,HSD17B12,CTSG,UBXN6,XPO5,CHMP4A,EIF3L,IGF2BP2,MDK,GL…
0.00743116892100929	BAG6,JUP,GPC1	NEK9,IARS,DSP,PFKL,DRG2,RBCK1,SDAD1,MNDA,NUCB1,SKIV2L,LEMD3,GOLIM4,ITGA5,VPS26B,STRIP1,ZRANB2,NAPA,SSBP1,GON7,LAMA5,HMGN3,TTC37,ILF2,BAG6,LSM6,C2,SRSF2,GAR1,CCDC6,ACO1,ILF3,TRIP11,SERPINB6,KPNA1,DDX39B,CNBP,RAB8B,RARRES2,C16orf62,USP9X,SLC44A2,SORD,FDXR,CBFB,ALDH2,ATAD1,PPAT,NUP54,PITHD1,GALNT2,GOLGB1,WFS1,CFH,EIF2A,RBM26,TMEM109,DDAH2,JUP,ITPR2,PRPSAP2,CDH1,TMED10,SLC3A2,RPIA,SKP1,LRP1,PGP,EEFSE…
0.00743116892100929	JUP,ITGB4,ITGA3	JUP,ITGB4,CBFB,GOLIM4,CRELD1,CEP170,OSTF1,CDC42EP4,RBMXL1,TPM2,BANF1,FDXR,TMOD1,NAA15,AP3B1,ATP5B,CAPNS1,COPG1,COPE,ITGA6,HTRA2,ASAH1,NAPA,ALDH3A2,GPNMB,TRMT1,CSDE1,FECH,LAMA5,BAX,NACC1,DSG2,ESYT2,SEC23IP,LYPLA2,RAB2A,TOMM40,EPB41L2,TPI1,COG3,PLEK,DNPEP,OXCT1,RHOC,ALDH16A1,AP3D1,CDC42,LANCL2,STX7,TM9SF2,FLII,ASRGL1,ITPR3,PIGK,DPY30,SART1,HMGB3,PTGR1,CRYAB,CTSA,GSTM2,PEF1,PRCC,NAGK,COX17,SRRM1,IK,…
0.00118381561156985	RAN,SNW1,PSIP1,RTF1,BRD4,RUVBL1	RPS14,RAN,SREK1,SNRPC,EIF2S3,RBM25,AMPD2,AP2S1,HNRNPC,THYN1,NACA,HNRNPAB,HSPA14,CHTOP,ANP32A,RBM39,ZYX,FAM114A1,ECM1,FLNC,PRPF19,RPA3,RPL35,SNW1,HNRNPUL1,FEN1,H1FX,CWC15,SRSF9,FLNA,PIGT,HNRNPA2B1,PSIP1,SNU13,ECHDC1,RBM14,HSPA8,SRSF1,RPS20,SUPT5H,TRA2B,RTF1,PPP4R3A,STXBP1,GLRX5,BRD4,TSPO,PTBP1,DUSP3,PGM3,FBL,SORL1,RPL8,RPL3,NT5E,ISLR,RBM27,PHGDH,C5orf51,RBM12,SLC16A3,GTF2I,PAXX,RANBP2,PLS3,KRT17,C…
0.00834774318521387	LAD1,CDH1	LAD1,PDHB,SUMO1,NIT2,USP39,DUSP3,P3H3,MRC2,GRB7,NIF3L1,ASPN,TKFC,FARSB,ERP29,C1R,CDH1,GTF2I,TAGLN,SHC1,ACSS1,FTO,MSRB2,PDLIM7,MYADM,GNA13,SLC25A6,EPB41L2,NASP,SBF1,POLDIP2,PSME2,VIM,HNRNPAB,NECAP2,RCN3,CRYL1,VPS51,ZC3H14,PGM2,RPL17,POFUT1,ECHS1,PDHA1,CAPG,DRAP1,PPBP,NT5DC1,MTPAP,TM9SF2,ENDOD1,NFS1,NFU1,PPP2R2A,NAPA,CCDC6,CTSB,MAP1B,LXN,RABL6,BLMH,LSM14B,ALDH9A1,NPC2,BRCC3,VAMP7,CLUH,SPATS2L,RTF1,…
0.000248508824601605	LAD1,CTNNB1,CDH1	PPAT,SEC24D,DUSP3,LAD1,TRMT10C,C1R,CORO1C,SUPV3L1,DNPEP,IDH1,WRNIP1,PFKL,RAB31,TPM1,PEF1,CTBP2,TBXAS1,CBFB,TMLHE,PCNP,GAR1,GOLIM4,AHCY,NAXE,CLTC,PRDX6,ST14,DRG2,SLC30A9,AHCYL1,NIT2,CTNNB1,ZRANB2,ECHS1,ARFGAP3,GOLGA3,MYO18A,HDLBP,DDX18,TAGLN,ARHGAP1,SEC24A,ENDOD1,ZMYND8,NIF3L1,ASAH1,ITGA5,DCN,HSP90AA1,PKP2,AP2S1,PLS3,DPYD,ACAD8,CDH1,IMPDH2,ANKFY1,AP3D1,XPNPEP1,DSG2,PDLIM3,SAP18,GTF2I,CNN1,GLRX5,AD…
0.00834774318521387	LAD1,CTNNB1	LAD1,ILVBL,SRP14,IGLL5,APOL1,SCAF11,EPS15L1,S100A13,PON1,MDH1,ASH2L,RAD23A,A2M,BAZ1B,METTL7A,MDC1,PARK7,C2,ASNA1,MAP1S,SUCLG2,C5,SF3B4,DDX17,SERPIND1,LDHA,AKR7A2,GMPR2,BAG5,PSME1,ORM1,FRG1,BAG2,RTN3,DHRS4,RBP4,PSMA1,TXN,HSD17B10,CTNNB1,KLKB1,ECHS1,ITIH1,MDH2,SRP54,NECAP2,ME1,VDAC3,GOLIM4,APOB,CDC37,TKFC,SCPEP1,UBXN4,TIMM9,TP53I3,RAB8A,DBI,FUBP1,JCHAIN,PRPF3,CYB5R3,H2AFV,PPP1R2,SEPT8,GPD2,POTEI,PY…
0.00908956735432602	LARP4B,FHL3,FAM136A	MRC2,PSMA5,STIM1,TRMT10C,MYH10,PLS3,LARP4B,NUDT5,PCNP,FLNA,DSG2,GLG1,MYCBP,ECHS1,PSMB2,QSOX1,PRKCD,AP3B1,MAP1B,PRDX1,SLC25A3,COQ8A,ALDH6A1,GCDH,ARRB1,NACC1,NUDT16,LRPPRC,PANK4,RPL15,MPO,VPS26B,RNPS1,COL5A2,AHCYL1,MLEC,CD55,ANXA6,TPM2,PCOLCE,MDH2,RAD23A,SOX17,DSC2,SLIRP,SRSF10,PSMB1,F11R,WRNIP1,SERPINF1,PABPC4,FUT8,TBCB,BCAM,SLC9A3R1,PDLIM4,GNG5,DNAJC2,PKN2,FHL3,RPAP3,DUSP3,NT5DC2,NUDC,PIP4K2C,CHM…
0.00931389337093164	CANX,EIF4B,DCTN1,EZR,DNMT1	GMPR,ZC3H14,PSME1,WARS,RUFY1,GSS,BAG5,PSMB2,ARPC5L,ECHDC1,CALR,CLPP,NDC1,CSTF1,TDRD7,MAP2K3,LBR,NDUFB10,CYB5B,STX4,TUBB4B,ACADVL,AATF,AK4,HACD3,CLIC1,PSME2,ABRACL,LGALS3BP,HADH,LZIC,RAB3GAP1,DNAJB11,PPP4R1,TIPRL,HDAC2,SNRNP40,GBP4,NEMF,MTPAP,PKP2,FUT8,HIST2H3A,NT5DC1,FAM98B,CANX,NUBP1,GPC4,RBMXL1,POGLUT1,TBL3,DARS,GRB7,JUP,EHHADH,EIF4B,RPL38,DSC2,WASL,GPX4,MAP2K6,PTK7,CHMP5,TALDO1,ERC1,GPS1,RPS11…
0.00517462068303244	ARPC1B,ACTG1,MYO1E,AHNAK,VCL,ACTN4,ANXA2,ZNF638,RAP1B,DDX39B	LASP1,RTN4,TPM4,ARPC1B,ALDH1B1,ACTG1,ARL6IP5,THOC2,NRBP1,FN1,ACTN1,TPM1,RAB31,RRBP1,POSTN,RBM14,MAP3K20,LGMN,POTEF,FAM114A1,DNPH1,ARPC2,MGMT,SNRPC,TAGLN2,CAPG,NDUFB9,SNX9,MSN,HLA-B,RCN3,CUL5,MYO1E,CLIC4,SH3PXD2B,AHNAK,VCL,PALLD,BST2,VPS13C,PAK1,CORO7,IAH1,ACTN4,PIP4K2A,ANXA2,RPL15,MYL12A,NONO,USP10,C11orf54,MTCH1,SMYD3,ZYX,NOSIP,NAPRT,ZNF638,C9orf64,TMED2,HLTF,CNN3,GALK1,FUBP1,SKIV2L2,RTF1,RNPS1,…
0.000101613395729304	LTBP1,HLA-DPA1,EFEMP1	SMU1,EFHD2,SF3A3,SLC44A1,AKR1A1,NDUFS5,IRF2BPL,NOP16,STAG1,POLD2,ELAVL1,MAIP1,LTBP1,STXBP3,GNB1,H1FX,PSMA4,RPS4X,NID1,YWHAQ,SRP54,CNDP2,ATG7,AKAP9,LYPLA1,IGFBP7,VDAC3,JCHAIN,TUBGCP3,SNAP23,ARHGEF6,DRAP1,FNBP1,ARHGEF2,PUM3,PRPF4,FAM98A,TXNRD1,B2M,CCDC50,HLA-DPA1,PRKAA1,SCARB2,PGM5,C9orf64,STT3B,SMC4,LAMC1,FYCO1,EFEMP1,G3BP1,RMDN1,PRPF3,CD81,DCAF7,THOP1,TXLNA,COL4A2,TPP1,RBBP4,COL4A1,PRKDC,CCDC90B,…
0.00834774318521387	GRB2,AP1G1	DTYMK,SRI,REXO2,FTH1,BCKDHB,LRRC59,TM9SF2,APRT,ANK3,RPS12,COG2,METTL7A,TPP2,PRMT5,RPS21,TMED10,DIS3L2,MMS19,DOCK2,MIEN1,SUGT1,CDIPT,DOCK9,SKP1,NME2,PTGR1,SERPINB6,GRB2,SELENOH,PPP1CA,P4HB,SLC12A7,CPSF1,HPRT1,COG4,EHHADH,LACTB,ARHGAP17,SCLY,OXCT1,NQO1,FH,C9orf64,MRPL44,VARS,CST3,ADAM17,C11orf58,CDS2,LMAN1,AP1G1,EIF4A1,HSPA14,IDH3A,CFB,ATP6V1G1,NAPRT,ESRP1,TMEM126A,GALK1,FBN2,NEMF,FMNL1,GEMIN5,BCAS…
0.0049581758091763	PPP2R2A,MARK3,PKP2,PPP2R1A,PRKAA1	SNRPC,PIP4K2C,DDX39A,CWF19L1,ITIH1,NDUFB10,SORD,ABRACL,DSG2,SCAF11,PPP2R2A,RUVBL1,ZC3H14,PSMC4,MARK3,BCAT2,PKP2,SMARCC1,DUT,FUBP1,RAB11B,PNN,CDC37,CS,MATR3,LRRFIP2,AFDN,STK39,LUC7L3,BAG5,DNM1L,PPP2R1A,WTAP,DSC2,PSMA2,PPT1,BABAM1,PGM2,DNM2,AMPD2,TBC1D9B,C1QB,PKP3,CRYAB,HMGN1,SRSF1,DDT,GLDC,EIF4B,TRA2B,ERGIC1,TSSC4,BCAM,CNN2,PRKAA1,RCN3,ATP6V1D,DSTN,GATM,TXNRD1,TJP1,HNRNPA2B1,SBF1,DFFA,SAP18,SHTN1,…
0.00226226485629081	SNRNP70,PTBP3,SNRPA,HNRNPA1,SLTM,STOML2,AKAP8,NAA15,DDX5,HNRNPDL,CDK2	PRKCA,CCNY,GRHPR,SMNDC1,SDHA,RPL30,PPP1R8,SLC25A3,CYC1,SNRNP70,URB2,WDR81,RBM39,IRF2BP1,SCO1,H1FX,BRD4,TXNDC17,CLEC3B,FOLR2,TGM2,PTBP3,ITIH1,QTRT1,FDPS,PLOD1,SNRPA,MCU,SEC61B,TMEM263,ST14,MCCC1,HNRNPA1,NUBP1,RBBP6,SLTM,TBC1D9B,CLPX,RAN,TIMM9,STAB1,TOR1AIP1,SDHB,NAT10,STOML2,LYPLA1,ADAM17,GNG5,POLD1,SAMD9,APOD,DPT,EPN1,CWF19L1,TMX1,RAE1,CCDC90B,YBX3,AKAP8,YES1,CKB,PMM2,POLR3C,NAA15,COL4A3BP,COL1A1…
0.00376380113989743	URB2,RPL13,CEBPZ,NOC2L,RPL10A,PWP2,CHMP1A	COPZ1,GPI,MFAP1,APOL2,POLB,ERH,CD74,SNRPA1,VIRMA,PDIA5,HMOX2,URB2,RPL13,SNRNP200,RAB31,GORASP2,PPP6C,GOLGB1,NDRG2,POLD1,UBXN7,WDR1,TPR,PBDC1,SBF1,FKBP3,NOP58,AK3,CWC27,CEBPZ,GLUD1,HADHB,MRPS25,EXOC4,NOC2L,OSTF1,FHIT,RUVBL1,HIST1H3D,LTF,COX7A2,HNRNPR,ACAA1,FNDC3B,PHGDH,HNRNPF,RPL10A,TNPO1,PIGT,PUM3,TRAM1,GNPAT,RPS12,GARS,REEP5,HNRNPH3,PARK7,PWP2,COL12A1,ILF3,POLR3C,AGT,ASNA1,ARPC5,MMS19,METTL7A,PO…
0.00510804944096897	RAB8B,PIGS	NOC2L,FKBP3,HSD17B11,FHL2,SEPT11,COPS2,GPI,MFAP1,RAVER1,TMX4,CRABP2,AIDA,SNRNP200,STAT2,CPSF6,AP2A2,VAC14,IFI16,AGL,ADPGK,LXN,TNPO1,RAB8B,ARPC5L,NSDHL,METTL26,ATP5J2-PTCD1,FBP1,SSBP1,PIGS,SNAP23,SBF1,PPP6C,SEH1L,RAB31,RPL35A,MPV17,MAP7D1,HADHA,LAMTOR1,PDIA5,SMARCB1,LRRC47,CNPY3,FIP1L1,ATP6V0A1,H2AFY2,NDUFA13,SLC16A3,EPRS,CAB39,AK3,PDP1,TMEM126A,PSPC1,SORD,RBM25,ABCF2,SRP14,AKAP9,RBP1,FAM129A,YAP1…
0.0077851431733886	MKI67,G3BP1,CDK1,DCPS	MKI67,LARP1,FLOT2,NTPCR,CCDC6,G3BP1,INTS13,PSMB7,PPP2R1A,FLOT1,UBXN4,MPI,KRT23,VAPB,CBX5,RAB14,AP2A2,HLA-B,CDK1,GIT2,ASMTL,NDUFB6,PTPN23,CDC23,IGSF8,ALYREF,CCT4,TRAFD1,DCXR,PSMD11,SMC2,TARS,APRT,SLC25A13,GON7,FIBP,PLOD3,CSTF1,CSK,ACTL6A,USMG5,PTPN1,CHORDC1,SNX4,LSM8,FOXK1,PDIA2,UBE2M,DCPS,GATM,PRNP,TLN1,CLNS1A,CLASP2,SWAP70,ZMAT2,CSTF2T,PSMD14,PIGS,RIF1,CHI3L1,YKT6,IVD,CSTF2,CAPZA2,MFN1,PARK7,MAP…
0.0077851431733886	MKI67,CDK1,IFI16,TOP1	MKI67,RPL7A,RBM17,NSMCE4A,DBR1,RPL35A,MRPS6,PNP,TRAFD1,BCCIP,MEMO1,RPS18,EIF3D,TRIP10,EIF3G,RPL35,ARL3,ND4,ESD,RSU1,RPS26,PPP6C,PCNA,TP53I3,CDK1,U2SURP,DPT,ABCC4,HACD3,FRG1,PSPC1,AK3,NASP,NACA,OLFML1,ZC3HAV1,F8A1,DDX5,CAD,PGLYRP2,PHB2,GTF3C2,DHX36,FABP5,SMNDC1,SNW1,MPDU1,OLFML3,TCEA1,APEX1,ZMYND8,UROD,PSMA6,RPL11,PGM1,CSNK2A1,RBM8A,TOMM70,PSMD8,KLK6,RTF1,NOSIP,POLR2D,NBN,IFI16,GLDC,RSF1,FBN2,CHMP…
0.0077851431733886	MKI67,PCBP1,G3BP1,DCPS	YKT6,TARS,SPTLC1,H1F0,NUDT5,ACOT13,MKI67,TOLLIP,CYB5R3,PACSIN2,SEPT2,SLC25A13,SERPINA7,PURA,PFDN5,LBR,TES,TOP2A,SRRT,IDUA,TRAM1,AMBP,SMARCC1,C8orf82,TARDBP,TNPO3,TMOD1,WDR5,IVD,SYMPK,C21orf33,DPYSL3,SF3B4,ISLR,GATM,PSME2,NXF1,ARHGAP1,PCBP1,CTNNA1,ITIH4,PA2G4,STK24,PSMD5,GIT2,HSP90B1,GFPT1,C7,EIF3E,TOR1AIP1,MRPS31,NAXD,SRPRB,LONP1,RSU1,VRK1,FAF1,USP39,ZW10,AGO2,SNX18,ACOT9,PRDX4,VIM,REEP5,EIF3J,PO…
0.00359574286353992	DYNLL1,MOGS,SYNE2	HMGN2,MYO6,UQCRC2,NUCKS1,NDUFA7,PSMA5,HBS1L,PSME1,HMGN1,CBR1,PCNP,DNASE2,PSMA2,ZC3H14,LMNB1,PSMA1,CRIP2,AKR7A2,C6,DYNLL1,DAG1,DHX36,PRSS1,NIF3L1,CIB1,RNMT,RPL26,IL4I1,CD74,C8G,CLTA,RPS16,SMC1A,TMX1,OGN,CNDP2,SLC29A1,ST14,SPR,CSNK2B,SUCLG2,CSTB,LYN,MOGS,UGP2,PGM3,ATG7,PRKAR2A,CPXM1,ADD3,RPL36,PGP,HLA-B,BCAM,RBM12B,RPA2,HDLBP,ACTR2,FBLN1,IARS,H2AFY,NOC2L,ASCC3,COMMD4,PTK7,SERBP1,HNRNPA2B1,GATD1,PPP…
0.00217880147716327	MYBBP1A,EFTUD2,RPL14,RPL18,PCNA,RRS1,RPS14,SND1	SARNP,MYBBP1A,RPS27A,RALY,EIF5A,TRMT10C,RPL13,PTGFRN,MFAP1,EFTUD2,RPL31,PCNP,CSE1L,RBBP4,RPL23,RPS20,PPP4R2,TRMT1,EBNA1BP2,RBM28,RPL14,UQCRB,IMPDH2,SDHB,CLTA,UBA1,RPS17,TRAP1,RPS25,MAT2A,THOC6,NOLC1,RPL18,DRAP1,ELANE,MRE11,PCNA,ADH5,NOP10,HNRNPAB,MPO,PRTN3,CHTOP,PFDN6,LTBP3,ANXA5,LAMTOR3,YBX1,HACD3,RPL24,PFDN5,C8orf82,RAE1,RRS1,IDH3B,RFC2,UBE2L6,RNF114,TIMP1,C16orf62,RPS14,WDR18,POTEI,TLDC1,ATG3,…
0.00861055239477913	PES1,RRS1,NOP2,RSL1D1,RPL30,BOP1,FTSJ3	PES1,RRS1,CAPN2,TSR1,NIP7,RAI14,ARL3,DNAAF5,IWS1,PWP2,BRK1,PFN1,NUP160,LAMC1,SLK,CLUH,HNRNPA3,PGM5,QSOX1,DAG1,NUP153,UTP4,WDR70,YWHAE,KANK2,SELENOM,NELFA,GNA11,COX5B,WBP11,VAV2,NOP2,DARS,COL1A1,WASL,NDUFB7,PUM3,DPYSL2,NDUFA8,DENR,CYB5R3,AP1B1,BIN1,RSL1D1,EMG1,PAWR,PIK3R4,PSMB4,WDR12,PSMA1,RPS5,RPL30,SLC25A20,EIF6,RALA,BOP1,JPT2,NELFCD,CTNND1,MORC3,TMEM43,NAA15,RPL32,HADH,SMPD4,NOC2L,RPS10,VASP,LA…
0.00230190978442564	ARPC1B,ACTR3,SEC16A,EFHD2,UQCRB,CAPZA1,WDR1,ACTR2,PPP1CA	TWF2,TMSB10,ARPC1B,SELENOH,PRSS1,CORO7,TRA2A,ABHD12,HIST1H1E,ACTR3,ZC3HAV1L,MEST,GIT2,HNRNPLL,SEC16A,NUDT21,EFHD2,NAGK,UQCRB,LSP1,SLC29A1,ATG7,PAFAH1B2,LMAN1,LACTB,KIF11,TYMP,FMNL1,GBP4,EIF4A3,CLIC4,VPS11,AGO2,UQCRFS1,CAPZA1,MAP1S,FGB,GIMAP4,PEX5,WDR43,WDR1,VAV1,PLEKHO2,F9,SMU1,PSMA5,LIPA,MNDA,RNMT,ITGAX,TMEM109,PSMA4,NPC2,C9,AFDN,LZIC,ADRM1,FUT8,SAMHD1,USO1,MACF1,GC,CRABP1,PSMB10,SERPIND1,SPART,…
0.0077851431733886	ATG7,NASP,CDK2,PNKP	SWAP70,APRT,MRPS28,ATG7,EEA1,THBS2,NUDC,HIST1H3D,CRYZL1,RAP2B,FN1,CLTB,COL4A2,AP2A2,NTPCR,U2SURP,ADGRE5,ARRB1,WDFY1,EIF3J,APOL2,SNRPA1,POLDIP3,GPI,ITPR3,NDRG3,DBNL,RPL15,STMN1,RCN1,TBL2,MAGOH,PCYOX1,HIST1H1A,RAB31,PGP,TAF6L,BCAT1,ATP2A2,ACTR3,AMPD2,UBE3A,SOX17,ABCC1,SFXN3,GBP2,LAMTOR3,UPF2,FAM3C,CTNND1,ATP6V0A1,COX7A2,CBX3,NASP,SAE1,RRBP1,RAB5A,PACSIN2,VPS11,MYH14,METTL26,PYGL,CALD1,IBA57,RBM25,A…
0.0032192052555181	NHP2,DKC1,BOP1,NOLC1,LARP7,EBNA1BP2,NOP56,RPS4X	NHP2,AATF,RBBP4,NOP10,RPS27A,RPL36,GOLIM4,CRIP2,DAZAP1,RPS25,PCCB,IARS2,C4BPA,TMX3,DKC1,SUPV3L1,AP2S1,PDCD4,NCL,TOMM34,COPG1,SARNP,CRLF3,IMPDH2,GOLGB1,SAFB,TRMT1,MYBBP1A,TFAM,HNRNPF,HSPD1,SORL1,P4HB,RPL23,F11R,NIT2,POLR2C,STRIP1,AFDN,DBT,PSMA5,DNPEP,SNX4,BST2,ACAP2,MAN2A1,NUBPL,TMA7,DNPH1,SCRIB,SNW1,CTNNA1,APOB,RAB21,MCCC1,FGA,PPBP,LSM14B,GRB2,BOP1,BPTF,RPLP1,NPLOC4,NOLC1,SHMT1,JPT2,DDX58,RPL29,G…
0.00177348820920246	RPS2,SERBP1,YBX1,PCBP1,LARP4B,RPL23A,RPL35,C1QBP,RPS14,RPS4X,GRB7,EIF5A,CCT2,RPL29,PARP1,RPL4,DDX50,DDX24,RPS28,YWHAZ,FASN,PDCD11	HNRNPAB,TNFAIP2,SOX17,PFDN5,RPS2,AP2S1,DAB2,PFDN6,STOM,NASP,SERBP1,YBX1,ATP6V0A1,CTSG,RANBP1,VBP1,PECAM1,SPCS3,COPG2,MRPS16,PCBP1,OSTC,CHMP4A,TBL3,LARP4B,DPY30,NUDT5,MFAP1,SCRIB,SUPT5H,SFXN3,MLEC,RPL23A,TRMT1,GALNS,RPL35,C1QBP,DIAPH1,ACLY,POTEI,DCN,VRK1,RPS14,HIST1H3D,CRK,RPS4X,GRB7,SRP9,EIF5A,IARS2,RPS27A,RAB8B,MRPS17,GALNT1,ABCD3,SH3GL1,RALY,CCT2,CRABP2,NHP2,RPL29,COL4A3BP,NDUFAB1,PARP1,EXOC3,T…
0.0046909948000581	POLR2A,RELA,TRIM25	THYN1,YLPM1,ACP1,RPS14,CAPRIN1,CSNK2B,PDS5B,RBM39,ANP32A,LSM14A,SNW1,TIMP1,HMGB1,ZRANB2,SET,TRA2B,RPRD1B,ANP32B,SMARCE1,MXRA5,PPP4R2,KDM3B,RAD21,ABCD3,NT5E,SNRPC,RPL28,SF3B3,HMGN2,SMU1,SAP18,HMGN1,RPS17,RPL21,PPIG,PPM1A,SRSF5,GALK1,BCLAF1,POLDIP2,PHF6,POLR2A,GSTP1,RBM12,RPL4,PSMA2,RNPS1,SERBP1,SNRPG,SMARCA5,SLTM,HSPA4,U2AF2,HMGB2,NSMCE4A,TIMM50,RELA,ADAR,CD109,MCM2,SH3GLB1,PRKCD,TRNT1,C9,SF3B2,YW…
0.0054462186012584	SMC1A,RPA1,RPA3,CRK,DYNLL1,EPB41L1	GLOD4,SARNP,SNX3,AP2A2,COPB2,NOP10,DDX17,VPS13C,GLYR1,TEX10,SNRPA1,SMC1A,MTCH1,HKDC1,CHMP2A,DNASE2,CLTA,COPG2,MCCC1,TMEM189-UBE2V1,STK3,NNMT,APPL1,WDR77,SSR3,PTPN1,RPA1,RPA3,CD44,NELFB,ABCF2,ARPC2,DNAJC11,TFRC,TMA7,COL14A1,OSTF1,SUGP2,DPYD,RAB8B,QSOX1,TFAM,ASCC3,STT3A,SWAP70,LEMD3,GMPPA,CRK,ST13,ARHGEF40,TNC,PPBP,GOSR2,ME2,C1QC,RARRES2,DYNLL1,IAH1,NUP37,AATF,HIST1H1B,ANXA3,GRB2,NACA,SHC1,ARMC10,P…
0.00443271689683082	NUP188,RANBP2,NUP107,NUP35,TPR,IFI16,NUP210	NUP188,ITGAV,RANBP2,NUP107,NBN,FAM129B,API5,GTF3C2,COPS8,ARPC5L,UBQLN4,CPNE1,MACF1,RBM27,DSP,TMLHE,NUP35,NDRG1,GMPR,GRIPAP1,SOX17,UACA,GLYR1,TPR,DSC2,ANXA2,TM9SF3,SCAF11,TNKS1BP1,CFH,NUP58,CSNK2B,AP2M1,NUFIP2,C5,DDX52,SEC22B,IFI16,TPM2,ZNF185,S100A6,XPOT,ITIH1,STRN3,APOL1,PDIA6,TAGLN,RAI14,HKDC1,ITGB5,FAM120A,PARP1,NT5E,NUP210,GSN,PTBP1,FLAD1,CFB,PPFIBP1,NIT2,DPYD,ABHD16A,PFDN1,METTL26,FUS,TOMM70…
0.00620037161100885	CDC37,LMNA,CTNNB1,NUP88,NUP133	CASP1,BABAM1,CTSC,PDHX,FABP3,ELANE,ARFGEF1,WDR5,PARK7,COX7A2,SELENBP1,COL5A1,NUDCD3,BST2,ITGB4,FERMT3,CMAS,ARFGAP1,EPS15L1,EHD3,CDC37,GTF2I,TOP2A,CRYZL1,TOMM34,NUCB2,RAB31,LMNA,HIBADH,BROX,WDR33,CTNNB1,CSRP1,VWA1,RBM17,TSG101,QRICH1,SCAF11,CRABP1,NT5DC1,FLNB,TMEM214,BCCIP,ATOX1,EVL,TSN,BRIX1,ACSF2,UBA6,THBS2,DYNLRB1,HNRNPA0,TAF6L,NUFIP2,PKP4,IDH1,GSTM2,POGLUT1,EIF4E,VRK1,MPO,KNG1,GSTT1,HSDL2,SUCL…
0.00678506601463465	OPTN,RAB14,TFRC,YWHAB	RBM27,FASN,DIAPH1,OPTN,EIF2S3,OS9,RPS16,SDCBP,RAB14,DDX5,EML4,ARMCX3,HMGN2,NAPRT,RPS28,SEC23IP,EIF3L,POLR2C,SLC29A1,PRDX1,FAF1,FAM91A1,RPE,H2AFX,HACD3,SRBD1,RACK1,ATP6V1B2,HK1,USP39,GMDS,CAPZA1,ERP44,TRIM56,HLA-DRA,TUBG1,CPXM1,HTATIP2,OTUB1,ANXA4,RPL13A,RPS10,MARK2,CLIP1,EFHD2,DSTN,HINT1,RAP2B,LGALS9,LARP1,TPM4,S100A16,LAMB2,SCYL1,FKBP10,SSSCA1,CRYZL1,SNX18,SYMPK,TFRC,PPBP,PPIB,TBCB,YTHDF3,PSPC1,…
0.00678506601463465	OPTN,RAB14,STX12,GNAS	MYOF,KTN1,SLC29A1,SNRPG,OPTN,VDAC2,ARF6,EIF4A3,RPL38,ZC3HAV1L,H2AFX,CLPP,PREP,EML4,F8A1,RPL32,RAB14,EIF4G3,PCYOX1,PRPS2,UBE3A,ARHGAP35,THOC6,SNRNP200,CPNE3,PPIL1,RPL35A,PYM1,HBS1L,PRPF6,PFAS,ABHD14B,SH3PXD2B,RPS10,PPAT,PTPRA,RPS24,SNRNP40,HIST1H1E,GATD1,TRRAP,VTA1,RCN2,PDCD6IP,SYNJ2BP-COX16,UGP2,HMGN4,HECTD1,EIF3A,UBXN7,SLTM,RTN4,RBM4B,FLAD1,PPP4R3B,RPL30,RARS2,ILF3,PFDN1,RPS16,TTLL12,SUN1,ST14,H…
0.00504842541052256	PALLD,PDLIM7,MYH9,ACTN1	CNN3,COMP,PDLIM5,VCAN,COL11A1,MYO1D,PALLD,CNN2,CILP,TLN1,PDLIM7,MMP2,FBLN2,ACTG1,PPFIA1,MARCKS,PLXDC2,FHL3,TAGLN,VBP1,NNMT,ALDH1B1,MYH9,SEPT2,HDAC6,NAGK,ARPC5,TPM2,FAF1,MXRA5,MYL6,SEPT11,PDLIM2,RSU1,ACTN1,HNMT,TPM4,PDLIM4,FN1,RBBP9,MYO18A,GRIPAP1,DDRGK1,CNN1,CAST,DPYSL2,CALD1,VKORC1L1,CLTB,GNPAT,DDX58,ERP29,EHD1,CHORDC1,MAP1S,MPRIP,TNS1,PGRMC2,DTYMK,MCM3,LMOD1,GBP4,ROCK1,SLC34A2,WDR91,PPP4R3B,GNG…
0.00504842541052256	PALLD,MYH9,HSPB1,ACTN1	CNN3,CNN2,TPM4,MYL12A,TAGLN2,FN1,PALLD,MXRA5,MYL6,AEBP1,DPYSL3,THBS2,MYH9,ALDH1B1,UGP2,HSPB1,PDLIM2,ITGAV,PDLIM5,TMSB10,SAFB,CILP,TNKS1BP1,POSTN,DLAT,PIR,EPB41,ACTN1,POTEF,CPSF6,PLS1,TNC,COMP,TPM1,CAST,DNAAF5,MYOF,HDHD5,GYS1,EML4,RTN4,AP1G1,DSCR3,MAP4,VPS33A,FBXO7,ARAP1,BLVRB,NUDT2,NUDT21,SPCS3,MMP2,RPS10,PPP1R12A,UNC45A,ARF4,EIF3E,DLST,PGM3,TUBB2A,PML,F2,CSK,RPS19,ACAA1,RPL27,ENAH,NDUFA7,PAWR,CS…
0.00504842541052256	PALLD,MYH9,ACTN1,HSPB1	CNN3,PALLD,RAB31,ZYX,FBLN2,PDLIM5,FN1,HTRA1,POSTN,SNRNP200,CNN2,MYH9,PLS3,TPM1,ECM1,PDLIM3,YWHAE,CALD1,CHD4,MPRIP,ARF6,HNRNPLL,TAGLN,ITGAV,MXRA5,C1QC,PCOLCE,SNRPG,SERPINF1,VCAN,SNRPA1,THBS2,CIB1,MMP2,CHERP,FABP4,GLUD1,ADRM1,PLXDC2,HUWE1,MYOF,ASH2L,FIBP,ILVBL,COL5A2,THRAP3,ABHD11,CTBP1,MYO1D,TPM4,ELP3,MYH10,YBX3,TECR,SPON1,ACTN1,SSH3,SQSTM1,SELENOF,EIF4A3,IPO7,HEATR1,MAN2C1,KHDRBS1,ECHDC1,SLC29A1,…
5.35118367957865e-05	PARD6B,SF1,LLGL1,PARD3,GOLIM4,HNRNPA1	PARD6B,RPL8,FHL3,CDH1,TRMT1,RPL29,GRB7,C1S,SOX17,GLRX5,PRDX2,PPIF,CLTA,STOM,MCCC1,MFAP2,FOLR1,SNRPA1,MYH10,SMARCA5,RBMXL1,THY1,CORO1B,ATP2B1,AKAP8,ELOVL1,SF1,NSUN2,LLGL1,MARK2,DDX56,AHCY,CUL3,EFEMP1,PARD3,ISYNA1,RNASET2,RAD23B,ASPN,SF3B4,BASP1,SUMO1,MCCC2,RPL5,GOLIM4,ESRP1,RPE,KRT19,GOLGA5,COL3A1,CANX,FAM114A2,HKDC1,NAXD,CHMP4A,COX5A,L2HGDH,TAF15,DYNLL1,NPLOC4,PABPC4,COL5A1,MRPL17,FLNA,PKN2,SSR1,…
0.000125576340797257	PARP1,H3F3A,SSRP1,THRAP3,ATM,PPT1,FEN1,CDK2,SREK1,HMGA1,NPM1,SHMT2	PARP1,RABL6,TCERG1,H3F3A,TRA2B,NDC1,RBM39,ACTL6A,RPS15,CELF1,RPL29,XPOT,SSRP1,NSF,COL5A2,C14orf166,CHTOP,FUS,THRAP3,SRRT,HBG1,HNRNPA2B1,LSM4,CPNE1,USP39,ZW10,AKAP12,CARMIL1,RPL36,RBM27,CHERP,METTL26,PDIA6,U2SURP,CTSD,RAN,CDV3,PHIP,FCER1G,NDUFS2,NUP88,C9orf64,MAGT1,TMSB10,NID2,COG3,HSD17B12,ATM,DDX17,PPT1,HNMT,HOOK1,TMEM209,RFC5,COX5B,FEN1,PFDN1,MYO1G,MRPL49,HMGN3,C1R,POLR2H,CDC23,UQCRB,CDK2,NACA,…
0.00206540004067204	SMARCE1,SMARCC2,ARID1A,PBRM1	PPIG,NASP,COL3A1,SAMHD1,SRSF9,CNOT1,CS,SEC24D,PRPF38B,DNAJC9,SMARCE1,OSBP,ANXA5,PLAA,PTGES3,ZYX,SMARCC2,TMEM165,MAP4,PCBP2,NSMCE4A,VIM,F13A1,GNPDA1,MYO9B,COL6A1,DDX17,TRMT61A,IGFBP7,RSF1,BCAS2,TMEM43,CDK1,PTGES2,STRBP,RSU1,SFPQ,MRPL15,PLIN3,PAPSS1,TRIP6,FLOT2,PITHD1,CYB5A,HOOK1,SUPT6H,ZNF512,NCAM1,PYGL,ESRP1,TRIP10,CNN2,H6PD,ECM1,PPP1R7,SH3BGRL,MYO1D,PPP2R5D,TPM4,HDLBP,ARID1A,PLRG1,RRP9,RPRD1B,GT…
0.00260483141834913	LTBP1,ALCAM	EIF3M,EIF3C,YARS2,KPNA4,TPM2,GGA1,WARS,CTNNBL1,RAB7A,SRPRB,VRK1,EIF3L,VCAN,IK,RPF2,BASP1,GNL1,EHD3,EIF4A1,TM9SF2,GLRX3,RPS26,PRPF40A,PTBP1,EFEMP1,PSMA2,MYO1D,SQSTM1,SF3B1,S100A13,ETF1,HSP90B1,SORL1,CDC42BPB,IRF2BPL,AHCY,TIGAR,SNW1,PYGL,PPP5C,MEMO1,VCL,ACAP2,TRRAP,EIF3A,LZTFL1,ATXN2L,PEX19,TOR1AIP1,SKIV2L,FKBP4,LTBP1,CRABP1,SUMF2,TSG101,PLXNB2,MAPRE1,MARCH5,USP5,ARID1A,SKP1,DDX47,METTL13,UBA5,TSPY…
0.00142371243751364	TPM4,TPM1,PALLD,MYL6,TPM2,ACTN1,LPP,BMP2K	CNN2,CNN3,TPM4,LTBP2,ALDH1B1,CALD1,TRRAP,PLXDC2,MYO1D,PDLIM4,LASP1,COMP,TGFB1I1,TPM1,VCAN,ZC3HAV1L,MYCBP2,HNRNPLL,CRNKL1,ADRM1,THBS1,ACAT2,PALLD,H2AFX,PDLIM2,DLAT,MYL6,TPM2,ASPN,FHL3,ACTN1,LPP,SPON1,PTGFRN,RAC1,PSMD13,GNAI3,API5,CSRP1,SELENOH,PSMC3,VAMP7,IPO7,PSMD12,CCDC50,ARF6,NELFCD,RIF1,SORT1,ARHGAP45,IGFBP7,LMAN2,CTPS1,RRP1B,CD74,RBM14,MFN2,LZTFL1,ABHD14B,DAXX,ACADVL,COX6C,DNAAF5,ARPIN,PAXX,S…
0.000781533108249117	PELP1,TEX10,WDR18,RPA3,LAS1L,EFTUD2	PELP1,TEX10,ANP32B,WDR18,NT5E,RBBP4,MRTO4,ABHD10,USP39,CHTOP,HNRNPU,RALY,HLA-B,RPA3,LAS1L,SRRT,RBM39,RAB8B,DNAJC9,PPP4R2,ERP29,GRB7,SMARCC1,HMGB1,DHX9,DAXX,CELF1,DNAJC11,EIF5A,GOLIM4,CDK1,PTGFRN,F13A1,WT1,DDX52,NOP2,C16orf62,PARD6B,STOM,SREK1,PICALM,HNRNPA1,P4HA2,CSE1L,SMARCB1,RBMX,TOP1,FUBP1,TRMT1,S100A10,PCBP1,CHMP4B,PEX19,RPS8,PMPCB,DHPS,PSMA4,ALDH5A1,IDI1,WBP11,PDAP1,QSOX1,SMC2,POLR2D,NECAP2,…
0.00834774318521387	BAG3,XPO1	ALDH1B1,SPATS2L,ACTN1,CNN2,EPB41L1,PIR,PRSS1,PGM2,PLXDC2,FABP4,ADPRHL2,TMSB10,TPM4,PDLIM5,FAM213A,CALM1,PALLD,USP14,ARL8B,ND4,PPP1R12A,FBLN2,NSF,PSMD12,PAK1,BAG3,ZC3H14,VCL,CUTA,TLN2,MYO1B,FHL3,PDLIM2,LTBP2,XPO1,COMMD4,LSM14B,SP1,TOP1,RPS12,HNRNPA0,COMP,WFDC2,PAWR,SERPINF2,CD81,NDRG3,LXN,CRIP2,GON7,RBM22,TMLHE,RPS27A,LMNB1,DDX21,CYB5R1,DOHH,IRF2BP1,MYO9B,SEC31A,CILP,TTC37,HNRNPAB,C1S,PPM1F,MIA3,N…
0.00587402308509794	PKP2,DSP,JUP,DSG2	PKP2,DSP,RAB31,SH3GL1,LMOD1,BST1,JUP,SMARCB1,FHL3,ITGA5,C1QB,GLYR1,TPR,GAPDH,CD163,PSAT1,VIM,KDM3B,PCNP,SLC44A2,GEMIN5,SEPT8,PEBP1,FLII,HNRNPH3,TPM2,EHD4,C4B,CNN1,THOC2,RAC1,TJP1,AP2M1,NASP,MAGOH,GNG12,DSG2,SRSF6,USP15,SEPT10,HMGB2,PHKB,GALNT1,PRCP,PUF60,PTCD3,ZC3H14,CFL2,EFEMP1,CD55,PARK7,PGLYRP2,GALM,PRDX2,CAST,DHX15,PTGIS,MTIF2,STX18,HBB,RRP9,TEX10,APPL1,ABCC1,NUP88,FERMT2,CPSF6,FN1,NELFE,PICA…
6.87193373858067e-05	PKP2,DSG2,DSP,JUP,DSC2,CUL3	PKP2,DSG2,DSP,DPY30,ITGA5,ZC3H14,PELP1,RPS6KA3,JUP,MYEF2,OS9,YY1,DSC2,BAG5,ATG3,SOX17,SRSF6,PRDX6,ISLR,SAP18,DNASE2,ZRANB2,HMGB1,TCEA1,ALDH2,ACTR10,IDH3G,NLN,RPS15,POFUT1,NNMT,SMARCC1,CILP,RAB31,RBM42,RAC1,TMCO1,AFDN,PCBP1,NOLC1,SUSD2,ATP6V1B1,OLFML1,RMDN1,PPM1A,FBLN2,SSRP1,ALPL,HNRNPA3,LRRC47,PTCD3,STK10,ZMAT2,BAG2,DEPTOR,CUL3,TOLLIP,TRNT1,PSMA2,STOM,RPAP3,PAK4,POLR2D,MRPS9,MRE11,NCBP1,SRM,GIT1,…
6.87193373858067e-05	DSP,PKP2,DSG2,DSC2,CTNNB1,JUP	DSP,PKP2,DSG2,MYEF2,DSC2,PEBP1,BST1,ITIH2,RPS6KA3,MAP2K6,GLYR1,RAC1,YLPM1,DPY30,CTNNB1,TARDBP,PICALM,POLR2B,STRN3,C9,JUP,DDB1,FUS,NACC1,PCBP2,C19orf70,AFM,PSMB2,PRDX1,SART3,RANBP2,SEPHS1,BCKDK,NDUFB9,TCP1,SP1,LZIC,ITIH1,ACTR3,SLC25A13,C6,LTF,RAB31,HAT1,TPT1,HGH1,GLB1,IARS,TIMM10,CRLF3,VAC14,APOC1,NT5DC2,UTP14A,SIRT5,RRM1,PLD3,MDC1,DES,NUDCD1,LAMA3,CPT1A,EDC4,UBA5,ASNA1,GLUL,F2,C7,POLD2,MAOB,RIF1,…
5.35475159405548e-06	JUP,DSG2,PKP2,DSC2,DSP,YWHAB,SEC16A	JUP,DSG2,PKP2,DSC2,DSP,C9,WFDC2,WASHC3,PTP4A2,PBRM1,PTPRF,EMILIN2,YARS2,H2AFY2,MYCBP2,TMEM126A,BDH2,TSPAN14,ATXN3,ATG3,RPL13,CNDP2,EHD2,RAB3GAP1,STX18,DPP7,SLFN5,ATP6V1A,KLKB1,SP1,WDR18,CHTOP,VPS35,CD109,EEFSEC,LACTB2,SYMPK,YWHAB,PTPN11,CHMP2A,VWA5A,F9,EIF2B4,BCKDHA,CHMP1A,SLC39A14,GMPPB,F12,ARPC1B,MINPP1,FAM98B,FIBP,GLS,GRK2,ARPC3,KIF5B,NID2,SERPINB1,NACC1,SRP72,NIPBL,DNAJA2,RRP1B,ACTR3,SERPINF1…
0.0007140376190018	PKP2,DSP,DSG2,DSC2,JUP	PKP2,DSP,DSG2,VDAC3,DSC2,STAMBP,HPCAL1,NACC1,ANP32B,SOX17,JUP,PPM1A,HIST2H3A,DHX15,TBCB,YWHAZ,DPM1,ZRANB2,ALG11,MFF,SLK,RBM28,POLR2B,YY1,ATP2B4,FAM114A2,AUP1,AKAP8,LIPA,PRPSAP2,TES,NRBP1,C5orf51,SNRPC,HDGF,FIBP,NELFB,TTLL12,SSR4,HSPA12A,RANBP2,SNRPA1,SRRM2,CAPNS1,DDX27,MAP2K6,C11orf58,ACTR2,TRMT61A,UCHL5,RBM22,APOC1,TWF1,C19orf70,MRPS9,CSNK2A2,GIGYF2,DRAP1,SRPRA,CIAO1,CFI,FUCA1,UPF2,LAD1,HKDC1,SM…
5.35475159405548e-06	DSG2,DSC2,JUP,PKP2,DSP,CDH1,KRT18	DSG2,DSC2,GOLIM4,JUP,PKP2,CTNNA1,DSP,COQ8A,CHMP1A,AK4,SUPV3L1,ERP29,CDH1,TMEM209,TBC1D4,IDH1,DRG2,DDX50,SH3GL1,AP3D1,WRNIP1,BAG5,SNRPA1,CDC42EP4,SEC11A,ABCB7,GYG1,CPNE1,NOP10,GCDH,COQ7,ATXN3,SUPT16H,PRDX2,MTCH1,PPIB,RAB14,GLS,HDLBP,MAP1S,NEK9,NPC2,PCID2,ME2,DNAJC2,HLA-DPA1,WASL,GIT1,ZC3H14,PTRH2,PSAP,CLCC1,SNRPC,COMMD4,LEMD3,ARF6,NIF3L1,DNASE2,TNS3,EMC7,COX6B1,IWS1,TTLL12,CA2,EXOSC2,SFXN1,XPNPEP1…
6.87193373858067e-05	PKP2,DSG2,DSP,JUP,YWHAB,SFN	PKP2,DSG2,DSP,RNPS1,NXF1,MAP2K6,USP34,RAC1,GOT1,DDAH2,JUP,RRAS,IARS,SRM,YY1,MRRF,ZC3H14,ANPEP,PPP4R3B,ARPC4,FAM114A2,ARMCX3,STX7,PPM1A,SOX17,AFDN,DCAF7,DSCR3,EHHADH,VAMP7,FIP1L1,AP1G1,KTN1,MIA3,CRIP2,GALNT7,DAZAP1,GLUD1,CRNKL1,TIMM10,SEC24B,SNRPC,C11orf58,UBE2V2,TAGLN2,GPC4,FLOT1,METTL7A,MTHFD2,VPS18,COL4A3BP,ASPN,THOC6,KIF11,RCC2,EML4,UTRN,SEPT10,PPP1R12A,CCDC90B,SRSF1,SLC25A12,FKBP8,RPL17,KRT8,…
0.00834135026388261	RNPS1,SNW1,PRPF4B,SAP18,ZC3H14,GSK3A	HNRNPAB,CHTOP,SOX17,GCDH,HNRNPU,RNPS1,APOL1,MAVS,HNRNPL,MRPS23,AMPD2,SUPT5H,RBBP7,SNW1,C1R,RBMXL1,LARP7,HMGN1,PTBP3,AKAP8L,TRA2B,RPS27,ECHDC1,ANP32B,DNAJC9,HPCAL1,RPS13,HBS1L,PPBP,RAN,POFUT1,SPTA1,RPS14,MYLK,HNRNPA2B1,AEBP1,PPIF,SCYL1,SNRPB2,RNASET2,PPP1CB,BAG2,PRPF4B,NSFL1C,PSMA1,PELP1,PAFAH1B2,GSDMD,HNRNPF,LUC7L3,THBS1,RPL24,RPS5,SUCLG2,YLPM1,C5orf51,PRKAA1,DHX15,ALDH6A1,HSPA12A,FLNA,NCL,RPS3A,…
0.00678506601463465	PCNA,RAE1,PARP1,MOV10	ARHGAP35,DAG1,PCNP,EIF1AX,HNRNPAB,ATP6V0D1,RAD23A,PFDN6,RPL23,SEC63,DNAJC9,PCNA,TOMM22,RRP1B,IRF2BP1,KRT17,WDR11,RBM28,TMA7,TPP1,CLTA,AATF,ERP29,SNRNP70,C1S,PPP4R3B,LAMTOR2,SURF4,PRMT1,SMNDC1,RALA,RAP1GDS1,GOLGA2,EBNA1BP2,ABCB7,SOD1,CYB5A,TIMP1,FKBP1A,LTF,NSUN2,EXOC1,TNPO1,PAFAH1B3,DAXX,S100A8,APPL1,ARF5,RAE1,ATP6V0A1,PARP1,RALY,GRWD1,HMGN1,CASP8,TMSB10,EIF4B,SSR3,RAB11B,MYO1G,PTGES3,SF1,COPB1,PD…
0.00194695087501461	MYO1C,SYNPO,DBN1,TTLL12,MED23,PPP1R12A	GNA11,RECQL,MYOF,GSTZ1,LASP1,MECP2,EML4,PGAM1,STRN3,TBCB,MYO1C,MAP2K1,DSTN,C7,CHORDC1,FOXK1,NOC2L,SP1,GALNT1,RAB10,PLXDC2,ACTN1,LMNB1,BCKDHB,MIF,STXBP2,FTSJ3,CWF19L1,IPO7,RNMT,TOMM70,GNG12,RBM27,SYNPO,PAWR,LPP,CEBPZ,EIF4A1,TLN2,GSTM2,AFDN,NIP7,ATP6V0D1,CCDC90B,GALNT7,ISLR,WDR33,USP34,CAMP,ADD3,TJP1,EHD4,ITGB5,SRBD1,SNX2,ITIH2,AASDHPPT,EHD2,ADK,GNL3,BST2,EMILIN2,THOP1,OPTN,ERC1,AIDA,PRTN3,SEC24B,P…
0.00122999467584903	IMPDH2,GPS1,DYNLL1,PRKAR2A,AKAP8	SP1,PPP1R14A,SNRPC,STRN3,VCPIP1,IPO9,COPS5,IMPDH2,ACTR10,CCDC90B,REXO2,PEBP1,HGS,TOMM70,WASL,CRIP2,PSMA2,GPS1,ZC3H14,SAR1A,CLPB,FAM213A,ARSA,EML4,PSMA4,IDH2,BAG6,DSG2,IRF2BP1,PARN,TRIM25,PIP4K2C,PLAA,DYNLL1,GPI,ZRANB2,AAMP,RPS21,PCNP,TMEM263,HINT1,RAP1A,GMPR,PFKM,PPIA,RHOA,KTN1,PPT1,TMEM126A,CDC5L,ATRX,RAB7A,EFL1,G3BP1,YWHAG,PRPSAP1,HMGB2,PRKAR2A,LBR,ETF1,RBBP4,AKAP8,CD109,ITIH1,SLC27A1,C19orf70,…
1.14209462833355e-06	SF3A1,SNRPD2,TARDBP,SF3A2,HNRNPL,ALYREF,RNPS1,LSM4,SNRPC,PRPF3,SNRPA1,PRPF4,NCL	SOX17,BST1,CHTOP,SF3A1,SRRT,SNRPD2,SNRPB2,ACIN1,TARDBP,SF3A2,LAMA4,HMGN1,ALDH6A1,ITGA5,SRSF1,SSRP1,PABPC4,HSPD1,LGALS1,NT5E,SMARCA5,HNRNPD,OLFML3,RBBP4,EMILIN1,HNRNPL,ALYREF,RNPS1,DSG2,STK10,HNRNPH1,LSM4,TAGLN,NUCKS1,YLPM1,COL6A2,RPL4,DDX17,DCN,POTEI,SRSF3,DDX46,HNRNPA2B1,SLTM,TRIM22,ATXN10,GSTM3,LARS,SNRPC,RAB8B,PRPF3,WDR12,YWHAH,SNRPA1,RANBP1,RRM1,PI4KA,SYNPO,SCYL2,MAP1S,HTT,HSPE1,CDH6,PPP1R8,D…
0.00132797581287245	FBXO7,EIF3L,EIF3E,EIF3H	SH3KBP1,CSK,PRKAA1,ENY2,HM13,PSMA4,SSR3,NOC3L,DRG2,GPX4,SUPV3L1,FKBP2,COMT,PRDX1,HK2,PPIB,RPL6,MAN2A1,RPL4,BCAS2,APOH,COMMD4,BSG,FBXO7,KRT7,ARPC4,RPS3,EIF3L,EPN1,ARCN1,CPSF2,ECHDC1,HDHD3,PZP,ARFGAP3,KRT19,PTPRA,BCAT2,MON2,ACTR1A,RBM3,CD38,TUBB4B,EIF3K,FKBP10,RPL18A,EIF3E,IDI1,PPP4R3A,HNRNPH2,ARAP1,SRSF3,SLC30A9,RPL36AL,ACSL1,CWF19L1,RPS10,NELFCD,HEBP2,RPS23,ENO2,ALOX5,ARFGEF1,PHGDH,FAM49B,RPL13A,…
0.00823842693434532	PSMB4,RPS8,PSMA4,PSMB1,PSMB8,SNW1,PSMA1,RAD21	GLYR1,CFB,RPL19,PSMB4,C5,HSPA12A,XPO1,MYBBP1A,RPS18,PDIA2,RPS8,SMARCC2,GALNS,RRM1,ZW10,SERPINA3,SCAF11,HIST1H1B,TBL3,SMARCD2,C3,MANF,TMA7,CYCS,PON1,USP39,MEIS1,USP5,PFDN5,DHX9,PBRM1,ATL3,PSMA4,LBR,PSMB1,PLOD2,HNRNPU,ALDH3A2,NT5E,SERBP1,HP,RCN3,CCT7,NASP,TRA2A,RPS14,LNPK,PAPOLA,TATDN1,EIF5A,AQR,PSMB8,RPL29,C8G,EIF4B,OSTC,RANBP2,RPS12,MPRIP,C4BPA,SNW1,SRSF2,SPTBN2,PSMA1,POLR2B,PGLS,CARS,MDH1,SEC22B…
0.00304596754933676	YWHAB,YWHAZ,SFN,ILF3	RBM47,SRSF9,ANP32B,SLC25A3,ZMAT2,RBBP7,RBMX,APPL1,RBMXL1,SF1,CPSF7,SMC2,STRBP,NASP,CAPRIN1,SLC44A1,PI4KA,KRT18,UBE2N,LTBP1,HMGB3,EFL1,GLG1,FBLN2,CHD3,PGM3,APEH,RBM14,ACAA1,SRSF7,SPARC,KPNA2,PCOLCE,PSMB7,NACA,UCHL5,HNRNPA1,CS,DYNC1LI1,FGL2,DPYD,PTGR1,C12orf57,GLUL,GGCT,ICAM1,MAP2K4,CBX5,PYM1,GLRX,IDH2,MCM4,VTN,GSN,DDAH1,TUBB4B,NT5E,YWHAB,RAN,BST1,HNRNPLL,NDUFA12,RABGAP1,LSM14B,FBLN5,KDM3B,GGT5,MET…
0.0045254662684451	NXF1,CDH1,PABPC1,SHMT2,GRB2,ADSL	SP1,STRN3,GNS,CCDC90B,CDK1,SP100,MCCC2,RPS27,MAGOH,PIN1,CD38,PYM1,VCPIP1,HAGH,HNRNPH1,METTL7A,PTPRA,PCBP2,LRSAM1,CFB,NXF1,PPP4R3A,HSPA12A,SPTBN2,KIF11,SLC2A1,OAS2,RBM27,GRWD1,GANAB,SGTA,CDH1,KRT17,CALU,PYCARD,PKN2,NPC2,SNW1,SBDS,RPL36A,MTHFD2,DCAF7,CCDC6,VPS26A,MAP2K2,NPLOC4,LTBP2,ASH2L,HMGB3,C9orf64,PABPC1,LMNB1,ABCF1,C19orf70,SHMT2,IST1,RIPK1,SMS,FIP1L1,MESD,TMOD3,CD55,LSM6,SMC2,STX12,ITGA1,SPI…
0.00689711549981983	CPSF6,RBP4,APOH,PSME1,ACOT13	IRGQ,SEPT11,ME2,SNRNP200,CRIP1,B2M,GPI,MFAP1,TNPO1,PPP6R1,HNRNPH3,COX7A2,DUSP3,PALM2-AKAP2,ADPGK,HDHD5,SAE1,BCCIP,CPSF6,NLRX1,ITGA5,POLD1,GOLGB1,ITGB5,CRABP2,RBP4,STX18,MAPRE1,PPIG,SF1,ACSL3,RAP2B,CORO7,TRAM1,VBP1,VDAC2,RPL10A,APOH,ERH,NOC2L,SP100,GALNT1,FOXK1,HSP90B1,NSDHL,CDK1,TIMP1,RRAGC,RPL13,SBF1,RCN1,FKBP3,HSD17B11,RPL30,NDUFA5,PDIA5,PXDN,CHMP1A,SUPT6H,ARFGEF1,SSRP1,PSME1,OSTF1,FHL2,LBR,LXN…
0.00191225877593423	SF3A1,RBM12B,MATR3	SNW1,TRA2B,SRSF1,CHTOP,SOX17,RAN,HNRNPU,CPSF1,CS,HSPD1,MDK,SAP18,SF3A1,RPL8,HMGA1,PRPF4B,DRAP1,SUPV3L1,BST1,XPOT,LUC7L3,CELF1,RPS3A,SUMO1,FUBP1,PPIL1,CHAMP1,ANP32A,PROS1,PCNA,DNPH1,SRSF6,SLIRP,SMNDC1,NECAP2,CSNK2B,DPY30,F13A1,SFPQ,MCU,SNRPG,KRT17,NT5E,ITIH1,DPT,FAM136A,PPIF,ESRP1,AMBP,PRPF6,PRDX3,SNRPD1,PELP1,HNRNPAB,DDX46,HTATSF1,C12orf10,DHX15,SMARCC1,HNRNPA2B1,LUM,PSMD4,SF3B5,RBM12B,MCCC1,CRNK…
0.00191225877593423	RBM10,MATR3,RBM12B	DYNLL1,TMA7,RPL19,RBM10,SF3B4,KTN1,RBM39,RBM12,TXNDC17,POLR2B,RNPS1,RALY,PYGL,CTBP1,SMC1A,HNRNPUL2,CKB,PSMA4,RBMXL1,DBI,BPTF,PPIG,DPT,SNRPA1,DHRS1,APOC1,DUSP3,TIMP1,DNAJC9,GALM,SF3B2,C6,TRA2B,ANP32B,IRF2BPL,FKBP3,DHX15,H1FX,MATR3,FOLR2,KLKB1,SMARCE1,CKAP5,DAXX,UBQLN2,PCBP2,TIA1,CD14,BCL2L13,ZW10,UBTF,SNX12,ABCD3,RABGGTA,FKBP4,WTAP,LZTFL1,PXDN,TMPO,STAB1,CORO1B,CNPY2,NUBP2,C5orf51,STRBP,IRF9,CDC5L…
0.00185132826615363	SRSF1,SMARCC2,RBM14,CUL2,DDX6,PRPF6,RBMX,RBM39,FMR1	SNW1,PTGES3,LNPK,USP39,TECR,SRSF1,SNRNP200,SMARCC2,GYS1,RARRES2,RBM14,ASH2L,CUL2,DDX6,RPL19,CBX5,HNRNPC,RPL13A,CCT6A,STK24,RBM12,ZMAT2,SDF2,TRIR,PDS5B,EIF4B,SFPQ,SCAF11,SNRPD3,DDAH1,RBMXL1,RPL29,BMP2K,PRPF6,C4B,ANXA7,DNAJC9,FECH,CCT8,RAD21,HIST1H4A,LANCL1,NASP,LAMTOR5,BCKDHB,RPL35,MRPS35,PRPF8,F12,FHL3,ACTBL2,TCOF1,RBMX,PRPF3,SIRT5,C1S,SF1,TSTA3,MSI2,PYGL,ECM1,RBM39,CWF19L1,RAB35,PLD3,ASMTL,TWF2,…
0.000443766707813321	RBM39,SRSF1,TOP1,SMC1A,HNRNPA1,MCM2,DDX17,PCBP1,SNRPD2,SMARCA5	SF3B2,RBM39,U2AF2,SRSF6,SRSF1,RPL6,HSPA8,DHX9,RALY,SNRPG,CDC5L,TOP1,NCL,PPIG,CELF1,S100A10,SRSF3,AP2S1,GPX3,SNW1,AHCY,APOC3,RPS14,LUM,EIF2B5,YLPM1,CA2,GCLM,SMC1A,PES1,USP39,DDX52,RPL21,CHTOP,CSE1L,SF3B6,HNRNPA1,SREK1,TCERG1,TRA2B,MCM2,HDGF,CDK1,DNAJC9,LEMD3,HNRNPU,SYMPK,DDX17,BGN,COL6A1,CPSF6,ZC3H14,USP9X,HSD17B11,PNPT1,NECAP2,CARM1,KIAA1217,PRPF40A,HMGB1,PCBP1,VAT1,RAP1A,PYGL,MCM5,STOM,RSF1,WASL…
0.00504842541052256	DHX15,RPA3,DIDO1,METTL3	DHX15,TOP1,RBMXL1,DNAJC7,HMGB1,RPL21,AKAP8,IWS1,MAPK3,AMPD2,RPL23,YY1,TRIR,NACC1,HMGN1,SRRT,AQR,RPA3,DIDO1,EXOC6B,PCNA,PSMB5,SCYL2,LAMB1,LAMC2,SREK1,EIF2S2,PMPCB,POLR2A,ALDH4A1,CPXM1,METTL3,HPCAL1,SBF1,HMGN2,ENDOD1,HBA1,BZW2,PPM1F,SPTB,HBS1L,PPL,LYPLA2,HNRNPU,UBA2,FUS,HSPA12A,DPYSL2,DFFA,TOP2B,COQ9,TAGLN2,DSTN,HECTD1,SSRP1,FAM114A2,RPL7A,LTA4H,TMCO1,ACIN1,EIF4B,UFC1,AHCY,CSNK2A1,RNPS1,AIP,DDX46,S…
0.000901551576666566	SNW1,SF3B2,SF3A1,CSNK2A1,ELAVL1,CHERP	DNAJC9,RPL17,ADAM17,TRA2B,SNW1,TLN1,PARD6B,SREK1,RPS14,SRRT,PCNA,SF3B2,DES,SF3B6,HMGN2,HIST1H4A,SNRPB2,RPL21,SF3A1,HIST1H1B,STX4,NOLC1,SNRPD2,AP2S1,HBD,PSMA4,SPTA1,CA2,GAR1,CSNK2A1,ELAVL1,SNRPC,U2AF2,DEK,COL3A1,CHTOP,RPS12,ECHDC1,DPT,RPL10,SERBP1,SRSF10,HNRNPA3,SAP18,MSH2,HIST1H1C,RPL36A,RCC2,FUBP1,RPL7,FGB,RPS8,RAN,WDR5,PNN,C1R,LUM,CSNK2B,NDUFA9,RFC4,SMC1A,NUDC,RPL7A,PTBP3,RCC1,HBG1,ANP32A,DNMT1…
0.0045254662684451	RBM25,RBM39,PRPF40A,SRRM1,RNPS1,MOV10	RBM25,RRAS,DRAP1,HSPA8,SNW1,VBP1,OLFML3,SRSF1,SNRPD2,CRLF3,INTS1,SFPQ,MSI2,CSNK2B,BDH1,SOX17,HMGB3,OLFML1,TMX2,DCUN1D1,SRRT,YWHAZ,PLIN2,CDK1,MTA1,FKBP3,TRUB1,WDR70,CFH,RBM39,FGB,TNFAIP2,RSU1,PCNA,HECTD1,PSMC1,PCNP,ALDH6A1,PRPF40A,KHDRBS1,EIF4G1,RAI14,TRIM56,PARD6B,TIGAR,HMGB2,XRCC5,ZC3H14,ACIN1,YLPM1,POTEI,EXOC2,DES,SRRM1,RBMX,YBX1,DDX6,CS,HPRT1,RNPS1,SNRPA1,RAD21,FUBP1,SRSF9,HTRA1,SSSCA1,PLOD3,I…
0.0045254662684451	RPA2,RPA3,RNPS1,TCEA1,SUPT16H,SREK1	SNRPC,ACIN1,PSMA4,COL3A1,RPA2,RAN,PCNP,NCL,SCAF11,SPTA1,CCAR1,PRSS1,PEBP1,RPA3,CHTOP,COL6A3,RNPS1,HMGN1,GTF2I,RPS15,CLEC3B,RBMXL1,NECAP2,DYNLL1,HBA1,KTN1,CSNK2B,RPS14,C4BPA,SOX17,CHERP,PCOLCE,NUDT16,SRRT,KHDRBS1,VWA1,PABPC4,RPS25,ZC3H14,OCIAD2,RPS6,FGB,HNRNPC,SMNDC1,SRSF9,UTRN,PTGIS,TMA7,THRAP3,SLC25A3,SF3B4,CA2,MYH10,SF3B2,DPT,TRA2B,SARNP,RRM1,TARDBP,TCEA1,ITGB2,GON7,FUBP1,NAP1L4,PYM1,HNRNPU,ENG…
0.0026480806682237	RAN,RBM39,FBXO7,RPS14,PCBP1,HECTD1,PRPF40A,SREK1,MTCH2	DYNLL1,RPS27A,RAN,RBBP4,NDRG3,PPP4R2,NAP1L4,MVP,PRTN3,RBM39,SCAF11,CSNK2B,AP2S1,ERP29,AATF,DEK,HMGN2,S100A6,HSPA4,MAT2A,WDR70,CTBP2,CKB,TSPO,RPL5,CPNE1,CLTC,RPL17,PPP4R3A,SCCPDH,ANP32A,HBD,CDK11B,RPS27,HNRNPH3,SLC4A1,HNRNPR,FBXO7,NUP43,NUDT4,TMSB10,HMGN1,ATL3,NACA,S100A10,SIN3A,EDF1,RPS14,STRAP,RPS12,RBM12,PCBP1,PDAP1,ZMAT2,HOOK3,HMGB3,DNAJC9,YLPM1,RPS25,ARHGEF40,LTF,TRIM56,NASP,NSMCE4A,GRB7,HECT…
0.00927573950641369	SF3B4,PCBP1,PPIG,TOP1,TRA2B,SRSF1,SNW1,DDX21	TAGLN,FBLIM1,LMOD1,CAVIN3,ASPN,ITGA5,LAMA4,AP2S1,COL5A2,DYNLL2,FHL3,PDLIM3,RPS15,PDLIM2,CHTOP,PDLIM5,MRPL1,ATPAF1,HSPG2,LXN,GRB7,LEMD3,CCT7,SF3B4,RAB8B,KANK2,VCAN,KHDRBS1,PCBP1,PPIG,AOC3,SNX3,ATP1B1,SF3B2,GTF2I,DUSP3,RAB31,GAR1,TOP1,AP2M1,VWF,SF3A1,TRA2B,RRAS,CAVIN1,NPC2,PDLIM7,DNAJB1,RPL36A,DDX52,HIST1H4A,VCL,RSU1,DNPH1,PECAM1,SRSF1,RAI14,LRP1,POTEI,SPTA1,SRP72,KIF11,SRSF3,SHMT2,NACC1,SORBS1,SOX…
0.00298517315105753	TRA2B,SNW1,NXF1,RBMX,HNRNPA1,HNRNPR,RALY,SF3B3	RBBP4,HNRNPA2B1,SSRP1,TRA2B,SNW1,SUPT16H,SMARCA4,SRSF1,PPIG,MFAP1,PRTN3,STRN3,RBM39,DAXX,SMC1A,PCNA,SFPQ,SMARCC2,NECAP2,SMARCE1,CSNK2B,DNAJC9,RPL8,AAMP,SRSF6,SNRPC,RAN,CELF1,DES,DEK,CHMP4B,HSPA4,SOX17,CRNKL1,FUBP1,NXF1,WBP11,PPT1,SRSF3,SRP14,PPP4R2,DNPEP,LSM4,BRD4,ITGA5,NIPBL,EIF4G1,RPRD1B,RNPS1,HOOK1,RAB31,SRRT,YBX1,CRLF3,RPL29,VWF,CCAR1,RBMX,CAT,HNRNPA1,UPF1,HMGN1,U2AF1,PFKM,SARNP,DPY30,ZC3H14,…
0.0067465390794137	RPL17,RPL10,RPL23A,RPL28,RPS19,RPL14,RPS8,RPS13,RPL18,RPL21,SLC25A5,RPL11,RPL5	RPL17,RPL10,UTP14A,ASNS,KTN1,TNFAIP2,DOHH,OGN,RPL23A,PON1,RPL28,RPS19,G3BP2,ATAD1,ARMC1,RPL14,PSMA2,LTBP4,LANCL1,PGM3,VDAC2,CORO7,PZP,TRIR,GNAI3,RBM47,RBP4,RPL36AL,CA2,RPS8,CA1,WFDC2,SPTA1,CFI,GOT1,GATAD2B,FOLR1,RPS13,RPL18,RPL21,SERPING1,SLC25A5,LACTB,CIAO1,ETFA,TRMT1,PSMC4,NUP43,ACAT2,PSMA4,RPL11,RPL5,KIF11,SLTM,WTAP,RBM26,RPF2,LRRFIP2,SRPRB,KRT23,PTPN1,ILVBL,CAPZA2,HMOX2,RDX,TRAPPC3,SLC27A1,SN…
0.00653093228995273	RPL17,RPL18,RPL10,EIF4B,RPL7,RPL4,TUBGCP3,RPS15,TUBG1,HNRNPA1,RPS17,RPL5,STAU1	FMOD,MTPAP,ZC3H14,GNG12,FBLN5,OGN,TROVE2,PRELP,WNK1,RPL17,PRKCSH,RBMXL1,CLIC1,CAV1,CDIPT,PSMA4,OLFML3,NPC2,MAPRE1,KPNA2,TNXB,FUT8,PPP4R3A,RPL18,PPIH,OS9,ZNF326,TAF15,RPL10,SORBS2,CPXM1,EIF4B,RPL7,SCYL2,RPL4,CLEC3B,TUBGCP3,RPS15,DRAP1,TUBG1,UBR4,NUBP2,HMOX2,GGH,CEP170,RPAP3,LAMC1,PSMA5,HNRNPA1,EMC7,GPX3,LAMTOR3,SEC23B,GSTP1,KIF11,EMILIN1,SCAF11,UACA,PDLIM7,NRBP1,KRT8,FN3KRP,RPS17,GRWD1,TOP2B,MAP2K…
0.000147648193610734	RPS12,RPS20,RPL18,RPL27,RPS17,RPS27A,RPL6,RPS13,HNRNPA1,RPL37A,CHERP,RPL15,PPIE,CAND1,EBNA1BP2,HSPA8	RPS12,RPL29,APOC3,FUT8,XPOT,CCT2,DPM1,POLR2D,EEF2,RPS20,SLC25A3,RPL18,HIST1H1B,SNTB2,TCEA1,UBLCP1,PIN1,SCYL2,METAP2,RPL27,KLKB1,ENOPH1,MINPP1,PCBP2,RPS17,VPS26A,DNAJC7,PRKAA1,CAP2,FAF1,MTHFD2,MRI1,F9,DNAJA1,EIF5A,CDC37,UQCR10,ZRANB2,NUP153,TOLLIP,HMGB2,STOML2,CCNY,RPS27A,F12,RPL6,ERP29,BAG5,C5,RPS13,DRG1,NAXD,C8G,HNRNPA1,CCT8,ENO2,CCT6A,VAV2,LRSAM1,PSMC4,GRHPR,PTPRA,RNF114,RPL37A,C4B,RBP4,APOD,RA…
0.0059670356216558	RSF1,MARK2,SMARCA5	STIP1,HIBCH,PMPCA,POLDIP2,EIF4G1,MRPL15,STAU1,RSF1,MMS19,MTHFD2,MRPS28,LRPPRC,TRMT10C,MRPL49,NUDT16,STOML2,CDC42BPB,PC,DNAJA1,SORBS2,TWF2,FMOD,TXLNA,VTN,MCCC2,PTGFRN,HSP90AB1,EIF2S1,LMAN2L,BCAS2,CSTF3,CCDC58,BSDC1,SNTB2,BIRC6,GPX3,TIA1,ESRP1,SLC25A3,PEX11B,PTER,PRDX4,NFU1,NAA15,MRPS7,HSPD1,COG3,DDX46,FLII,PLIN3,TSSC4,MRPL1,CNP,COL5A1,NME2,VPS29,ABCF1,MUC1,MARK2,SH3BGRL,HSPA4,RECQL,LBR,ABCF3,SYNCR…
0.0059670356216558	PHIP,RSF1,CSNK2A1	LBR,PC,YWHAZ,POLB,GCA,FAM160B1,POLR2I,HSPBP1,SCO1,PRSS1,DARS,ENO2,TXNDC12,ITPR3,TSPYL5,PAIP1,RRP9,TRIR,MTCH2,PTP4A2,PCYOX1,FCGRT,EHHADH,RPL35,EXOSC6,PHIP,FNDC3B,TMEM109,SERBP1,RSF1,VPS36,MAN2A1,SLC44A1,PDHA1,PSMB7,GSK3A,TBL1XR1,EIF3E,BSG,VPS29,RAD23B,EDF1,WDR37,BSDC1,C16orf62,HNRNPH2,TMED4,DIS3L2,APMAP,ETFDH,RPF2,UROD,ELOVL1,SUCLG1,TXN,RPL18,TOMM34,MMP14,GART,SMARCC1,NTMT1,RPS15,PRDX6,FAM49B,DLD,…
0.0059670356216558	EIF3I,XPO1,IWS1	POLB,EIF3I,POLR3C,IMPDH2,B2M,MFAP1,TMED3,GNAS,FIP1L1,CD74,POLDIP3,SUCLA2,SNRNP200,MAP7D1,FIS1,SELENOF,LXN,LTF,HNRNPH3,RPL35A,APOA1,ERH,DDAH1,EIF4A1,DUSP3,COX7A2,CSTF2,CALM1,ORM2,EPS8L2,CCT2,WDR70,HNRNPH2,SF1,GBE1,CCDC6,ABCF2,SVIL,STT3A,ADPGK,CAPG,DAG1,EPRS,SBF1,COPS6,MOGS,PTBP3,LAMTOR1,ATXN3,AP2A2,CPSF6,SSBP1,XPO1,PTPN11,TIMP1,VIRMA,SNX12,MGST3,PDIA5,ALYREF,AKR1C3,CUL3,PHGDH,MYO1C,YAP1,FAM129A,CR…
0.0059670356216558	EIF3I,XPO1,IWS1	POLB,EIF3I,POLR3C,IMPDH2,B2M,MFAP1,TMED3,GNAS,FIP1L1,CD74,POLDIP3,SUCLA2,SNRNP200,MAP7D1,FIS1,SELENOF,LXN,LTF,HNRNPH3,RPL35A,APOA1,ERH,DDAH1,EIF4A1,DUSP3,COX7A2,CSTF2,CALM1,ORM2,EPS8L2,CCT2,WDR70,HNRNPH2,SF1,GBE1,CCDC6,ABCF2,SVIL,STT3A,ADPGK,CAPG,DAG1,EPRS,SBF1,COPS6,MOGS,PTBP3,LAMTOR1,ATXN3,AP2A2,CPSF6,SSBP1,XPO1,PTPN11,TIMP1,VIRMA,SNX12,MGST3,PDIA5,ALYREF,AKR1C3,CUL3,PHGDH,MYO1C,YAP1,FAM129A,CR…
0.00226226485629081	RBM39,SFPQ,SRSF1,TRA2B,PRPF8,CSNK2A1,DDX42,SNW1,NELFE,DCPS,CDC5L	HNRNPA1,RBM39,SARNP,C1QBP,WBP11,PARP1,RRAGC,LUC7L3,SFPQ,DPY30,ITGA5,FDXR,SPAG9,TFAM,SRSF1,TRA2B,MRPS6,NANS,UNC45A,NELFCD,NDUFAF4,SH3GLB2,PRPF8,HOOK3,SMARCE1,CD44,HNRNPC,RAB14,SACM1L,NUP107,NNMT,GGT5,NOP58,DNM1L,C16orf62,FBL,ACSL1,POTEI,RBBP9,RAD23A,CSNK2A1,ISYNA1,DDX42,PRPF38B,SDF2L1,VAV1,SAFB,NXF1,VASP,METTL3,MMP14,NELFB,VAPB,DDX17,BUB3,H2AFY2,NCSTN,LSM6,USP5,PDXK,VAT1,GANAB,DDX47,SNW1,YARS2,ATA…
0.000653971127796222	SNRNP200,MFAP1,MCM6,PUF60,KPNA1,HNRNPR,SSRP1,CALM1,MCM5,CUL3,MYO1C,ARCN1	CTSA,DCTN4,SNRNP200,DDX51,VCP,B2M,GPI,MFAP1,FOXK1,SBF1,AGO1,ABCF2,RPL35A,LTBP4,CHMP1A,RFC2,FIP1L1,MYBBP1A,RAVER1,MCM6,SH3BP1,MPV17,USP15,ITGB5,PUF60,MOGS,CD74,LAMTOR1,IFIT2,CDS2,EIF4H,NOP10,SHMT1,COL4A2,KPNA1,GLUD1,XPO1,ACAT1,HSD17B10,SND1,HSPH1,HARS2,COPS3,HNRNPR,SEC24B,RNASE1,SELENOF,VIRMA,NOC2L,STXBP2,TNPO1,CLU,ARPC5L,NSDHL,PSMD5,TMEM33,PON1,TMF1,PTPN11,NGLY1,MBOAT7,COMT,RAB8B,SSRP1,PPL,ORM2,Z…
0.00130303329113586	CHD3,HECTD1,RBM17	ATP2A2,CCDC6,STRN3,HMGB2,AP1B1,CCDC47,TXLNA,PPID,SERPINA6,GMPR2,MOGS,TIMM8A,PCYOX1,PPM1A,BCKDHB,GCDH,NGLY1,IL4I1,PRKAR1A,EHD4,GPNMB,PC,NAA15,MCU,TMED1,EXOC7,SELENOF,ZC3H11A,NFU1,MRPL1,FLOT2,FASN,OSBPL8,NPM1,CTSG,TIMP1,INPPL1,ARF5,C7,OSBPL9,BCKDHA,VPS16,ARPIN,AK4,ARHGAP35,NIP7,TXNL1,CCT6A,PTPA,RPL34,USP24,CRYAB,CLTC,CHD3,ATM,COPS3,MRPS7,RBP4,HECTD1,NSDHL,RPL27A,PSPC1,OSBP,ABCC4,NPLOC4,ACOX1,DNAJB1…
0.00479918269421598	COPS2,SMARCA5,FOXK1,GOLGA2,MGEA5,RAN,FUBP1	DYNLL1,LRSAM1,RPL18A,USP15,PPP4R2,RPL10A,COX5B,DHX29,VWA5A,MGST3,TES,SLC27A3,AKAP8,COX2,NLRX1,TMEM33,NDUFA5,LAMC2,DERA,PPIF,HMGN2,MAGED2,DEK,ACAD10,LYPLA2,VPS33A,GNG12,PTK2,METAP2,DOCK2,MAN2C1,COPS2,GNL1,SMARCA5,PDS5A,PPL,EIF3D,EIF3G,FOXK1,ARPC4,BRK1,GOLGA2,VPS51,UBXN1,CUL1,DBNL,NUDT16,ARID1A,PSMB4,RDH11,ZW10,LCN2,ALDH7A1,EPS8L2,PLXNB2,COPS3,IBA57,HUWE1,TRIR,TRAPPC3,PODXL,RCN1,TKT,FARP1,PKP4,MGEA…
0.000486222202061922	HBA1,SLC4A1,CA2	HBA1,SLC4A1,HBD,HBB,HBG1,FGG,FGB,CA1,PPBP,SPTB,SPTA1,GPC1,SP1,ARHGEF6,NAPRT,UFD1,VAPA,GCLC,NFKB2,LMAN2,LZIC,THY1,DSP,CDC23,PRDX2,UBA6,OXSR1,SEC23B,STRBP,SPTLC1,EMC1,SORBS2,NCEH1,COX7B,LRBA,CA2,CSTB,IPO5,SNTB1,IGF2R,FHL2,TRIP11,TBCA,CD74,ABCE1,TXN,PHF6,USP48,KLK6,VKORC1L1,NHP2,EIF2S2,NUP58,PTPN1,ADAM17,PPP2R5D,HSP90B1,MPO,IL4I1,TAP1,TROVE2,MMS19,BMS1,SEC31A,POGZ,APLP2,STRN3,ATP2A2,DDX21,RPS27A,MAR…
0.00834135026388261	ADD1,SMARCB1,TAF15,SMARCE1,ARID1A,CHD3	SERBP1,NES,EIF4G1,TUBGCP3,ADD1,QARS,ADK,RRP1B,F11R,CAV1,CSNK1A1,CD55,AP2A1,UTRN,RPAP3,SMARCB1,NECAP2,SCO1,DHPS,SYNE1,PPIA,SNRPA,MFAP5,HNRNPL,RAB35,CDK2,RPL32,RANBP1,FLNC,CTSG,HSP90AB1,AP1M2,RPL24,RPL5,MYO1C,SVIL,SORBS1,LIMS1,ALAD,TAF15,PKN2,PCBP2,NACA,RTCB,CACYBP,SDHB,ERMP1,IGSF8,CARS,BCCIP,OGN,ARHGAP17,LAMA4,PUM1,PTER,PMPCA,YWHAZ,EIF4G2,AOC3,SMCHD1,AAAS,CILP,ABCF1,ADSS,CAVIN3,SEPT11,FAP,SMARCE1,…
0.000263969396519737	SF3A1,RPA1,SMARCD2,SIN3A,RBM14,FUBP1,BAZ1B,PBRM1,SMARCA4	SF3A1,NSMCE4A,TMX3,CCAR2,CBX3,ILK,RPA1,MRPS25,MSH2,MFAP5,ACIN1,FMOD,C3,RFC2,HOOK3,HRG,SF3B6,RPL37,COPG2,HNRNPA1,ISG15,C1S,FBLN2,SMARCD2,CNN3,ANXA5,SYK,LMOD1,COL14A1,MX1,SMNDC1,SCO1,HIBCH,SIN3A,SCCPDH,PARD6B,RBM42,AIMP2,RPL23,EXOC3,F8A1,HNRNPC,SMC1A,SRSF9,RTF1,RBM14,SREK1,RAN,ATXN2L,FLNA,SART3,PCOLCE,FHL3,KCMF1,RARRES2,LAMTOR3,PTGES3,RBBP4,POLB,FUBP1,CD14,SNRNP200,BAZ1B,THRAP3,MYEF2,RBM17,MYH9,RP2…
0.00678506601463465	SFN,MYH9,CLTC,SYNPO	NIT2,PRRC2C,GSR,NUP43,ARPC1A,NUDT4,GPS1,TAP1,BCAS2,LAMP2,PPP4R2,CRTAP,STAT2,PCNP,EXOSC5,CDH1,DHX15,ACTBL2,ZRANB2,GSTT1,ND4,GTF3C2,DERA,HMGN1,UPF2,LRRC1,SLC16A1,SFN,CTNNBL1,TKT,SORT1,MYH9,ARMC1,C5orf51,CHTOP,SP1,TYMP,DDX27,HADHA,ARRB1,VPS52,HSPA8,SRSF11,ALDH1L2,AP2S1,OSBP,SH3KBP1,CWF19L1,SSR1,QDPR,HNRNPH3,CYB5R3,RPS3,NDUFA4,COMMD4,CRIP2,RAI14,DHX36,ARHGAP1,EXOC3,SNRPD1,PANK4,HBS1L,PPIE,TAP2,CLPTM1…
0.00678506601463465	SORBS2,CLTC,MAPRE1,CAPZA2	LTBP2,MRPL4,SNX9,FBN1,CDC23,ALDH5A1,NAA15,EFEMP2,PPP4R3A,RAI14,TPM1,NDUFS3,LRRC47,LONP1,PGM3,AMPD2,TPM4,ARFGAP3,RNF213,NRDC,USP10,NUCB2,ABCE1,LSM8,MRPL11,CAPZB,VPS52,UQCR10,TNPO2,IGFBP7,FKBP1A,ILK,EIF4A3,RNPS1,CALD1,CSRP1,PPP1R21,GALK1,PARK7,OAS3,SORBS2,SRBD1,UFM1,CLUH,DYNLL1,ERGIC3,HADHB,EEF1B2,ZYX,CNPY3,MRPS9,NDUFB6,CD55,CLTC,SORBS3,STOML2,PANK4,SARS,NUMA1,EXOC8,SNX18,TRAM1,NEK9,ACIN1,SORL1,RBM…
0.00678506601463465	SFN,DLGAP4,SORBS2,SYNPO	TTC37,CORO1B,PFKL,SEPT11,AP3M1,FAM114A1,UMPS,GPC1,SFN,CNN2,ENO2,HDHD5,CELF1,SMARCD2,YWHAG,CRTAP,SDAD1,H6PD,HBA1,TMLHE,SWAP70,MFAP5,TNKS1BP1,DLGAP4,PTMA,IFIT2,NNMT,GDI1,SH3BGRL,GALK1,MYH10,ESYT1,SAFB,FGB,SCYL1,SLIRP,MTOR,RECQL,MDK,ISOC2,C1R,PTK7,ZYX,CILP,CLPP,POFUT1,DYNLRB1,USP14,CA1,KIAA1217,LDHB,S100A10,AUP1,TFRC,GPS1,UBFD1,SORBS2,ADSL,H2AFY,LEMD3,ABHD16A,RPL26,PSMD4,GPC4,MYO9B,LRPPRC,PNP,SYNPO,…
0.00363838394032904	SP100,HMGB1,IFI16,CRTAP	SP100,PFDN1,SOX17,UBE2L6,NES,PAPOLA,P3H4,CNDP2,RCC1,MYO6,OAS2,COL3A1,CALD1,SLPI,RNMT,CASP1,PRPSAP2,RUVBL1,CDH6,SMARCD2,QRICH1,ACTG1,PSMB8,ACTN4,MAT2B,TUBG1,LAMB1,ATRX,TMED9,ANXA2,CBR1,SLC4A1,NID1,PSMD6,SEC23IP,PBRM1,DCN,CPSF2,WFDC2,ZRANB2,PSMB5,EIF2AK2,GRIPAP1,COL12A1,SMCHD1,HMGB1,PRKAG1,SERPINH1,P3H1,FAM114A1,XRN2,SERBP1,LUC7L3,SOD1,MARC2,PSME1,IFI16,CELF1,TRA2B,CRTAP,CIAO1,PGLS,CLTB,PTGIS,MDH1,…
0.00908956735432602	THOC2,CARM1,IK	NOP58,LRPPRC,ND4,MAP2K2,PIGT,KYAT3,SLC16A1,GLRX,MARCKSL1,SRSF4,ANXA6,ASNA1,DDX47,GMDS,FBL,HSPG2,CDC37,ACLY,FHIT,TST,C14orf166,BCCIP,CBFB,TUBGCP2,RCN3,STAU1,EIF5,COMT,EIF4G2,FLOT2,CNPY3,THOC2,U2SURP,RPTOR,C8orf82,TOLLIP,SH3BP1,RDX,ECI1,CARM1,ZW10,PML,IK,HIST1H1E,ITIH4,PTBP3,CCDC90B,HNRNPK,SELENBP1,MSLN,ATXN10,GNL3,TAX1BP3,REXO2,OLFML1,VPS41,LPCAT1,CTCF,TMSB10,CASP6,GRPEL1,BGN,ATP5B,VPS33A,LXN,TMEM…
0.00241514298185394	NCL,GTF2I,PCBP1,SNRPC,U2AF2,SF3B4,SRSF4,ZC3H14,CDC5L,SAP18	MYH10,RPS14,ANP32A,SRRT,BRD4,SLC25A3,NCL,HMGN1,HMGA1,SUPT5H,RPA3,GTF2I,NECAP2,PCBP1,TARDBP,CD9,NPC2,PSMA4,PPM1F,SNRPC,TMEM43,ECHDC1,U2AF1,U2AF2,MAN2C1,KIF11,HP1BP3,EIF4H,GSTP1,ARFGAP1,RPL10A,ITIH1,CHMP2B,AP2S1,COL6A1,SF3B4,SREK1,PARD6B,NUCKS1,NUP85,KRT6A,DAXX,PDAP1,RPL6,LDHB,EFEMP2,PPP4R3A,COMP,RPL17,SRSF4,RPL18,NASP,ZC3H14,APOC1,DBT,BCKDHB,MEMO1,MCM3,PUM1,SMARCB1,AGRN,BCKDHA,BABAM1,SLC30A9,RPS27…
0.000276186474738907	HSPA8,HNRNPA1,U2AF2,HNRNPL,SFPQ,SF3B2,XRCC6,CDC5L,SNW1,HNRNPU,FLNA,FBL,RTF1,SF3B4,HSPA5	HSPA8,C9,HNRNPA1,U2AF2,RSU1,SRSF3,TRA2B,CHTOP,HNRNPL,SFPQ,PLS3,MYLK,GPX3,RPL5,TNC,ELOB,SF3B2,EIF4G1,PPIG,NDUFAB1,MAP2K2,C1R,BCLAF1,MPRIP,TBRG4,CSE1L,RFC2,XRCC6,THRAP3,HMGB3,CDC5L,MFF,RPL21,FGG,SNW1,RPL37,PDLIM7,KHDRBS1,SIN3A,HBB,SAMD4B,RPS15,ZC3H14,PROS1,UBTF,RPL14,RPAP3,HNRNPU,LXN,STRBP,ANP32B,SERBP1,CAPRIN1,FLNA,FMOD,FBN1,PARD6B,TAGLN,CWC15,KANK2,COL1A2,SMARCB1,LRBA,MRPS7,RTN4,BAG3,PDLIM3,PTRH2…
0.00603281748260562		FBLN1,SRP19,ATP2B1,RARRES2,MAP2K2,PTGFRN,MRPL1,PSMA7,RAI14,NRDC,HINT2,CAMP,ANXA5,PSMA3,TBXAS1,MCTS1,WDR61,ARL6IP1,CORO1C,H2AFV,AARS,ATP5J2-PTCD1,ITGB1,FUT8,IFIT3,DRG2,SH3PXD2B,PTP4A2,SH3BP1,CDC42BPB,HMGN3,SERPINH1,ERLIN1,SFXN1,MXRA5,MPST,SCFD2,IGFBP7,GATM,CCNY,IBA57,TIMP1,HDHD5,MRPL11,SUPT16H,SYK,HSDL2,GOLGA7,MYL12A,PAPSS1,MRPL15,ZC3HAV1,PON2,COG2,MRC2,SLC25A12,UACA,C4BPA,ALDH9A1,PTGIS,EIF4H,NARS…
4.9579060722779e-06	SRRM2,SF3B2,SNRPC,GTF2I,DDX50,DDX21,FIP1L1,RPS13,SF3A1,RPS3A,DHPS,RNPS1,U2AF2,PRPF4B,PRPF19,SNW1,SNRPD1,BCAS2	RAN,RPS14,AFDN,NASP,COL5A2,CAVIN3,RENBP,SRRM2,SLC25A3,PCNA,TARDBP,VBP1,NUP43,SF3B2,GGT5,CLEC3B,PLS3,BAG6,SNRPC,RPL17,NACA,PABPC4,GTF2I,PACSIN2,DDX50,RPL23A,RPS15,RPL12,HMGN1,RPS6,ECHDC1,RALY,DDX21,P3H1,AP2S1,FIP1L1,NT5E,SUPT5H,CHTOP,YLPM1,TGFB1I1,RAB8B,ASPN,SRRT,SNRPE,PTGIS,RPS13,CELF1,SF3A1,SNRPG,SRSF9,RPS3A,FUBP1,DHPS,CAV1,CCT2,RNPS1,UTRN,LGALS1,PDAP1,RNASET2,U2AF2,PTGFRN,ANP32E,CDK1,EPCAM,PRPF…
0.00273802964099564	SRRM1,DHX9,SRRM2,RPS19,EEF1D,SNRPB2,SF3A2,SF3B3,SNRPD1,HNRNPK,SNRPA1,HDAC2,RBM39	DDX27,HIST1H1C,MYBBP1A,H1FX,HIST1H1D,H2AFX,SUN2,EMG1,TCOF1,RPL19,TXNDC17,SRRM1,DHX9,ACTG1,COPE,PTGFRN,TIMP1,ASNS,CHMP1A,LGALS1,BCCIP,LDHB,PRKACA,SRRM2,AKAP12,RPS19,SRP68,HOOK3,ZRANB2,MAOB,EEF1D,BRD4,PPM1F,SNRPB2,CLEC3B,EIF4G1,LMO7,GIMAP4,NOLC1,RBBP6,SGPL1,FMOD,SF3A2,RAB8A,SF3B3,CELF1,GRB2,TNXB,FHL1,LYPLA1,COQ8A,S100A10,SNRPD1,RBM14,RAB31,ARPC3,ARHGDIB,XPO5,SERPINC1,VIRMA,PDCD10,HNRNPK,SWAP70,MTCH…
0.000905693052002688	SNW1,SF3B1,DHPS,YWHAB,HSPA8,PPIL1,SNRPD2,EIF4A1,RBM39,SF3A1,PRPF6,HNRNPA2B1,SFPQ,RBM8A	ZRANB2,TARDBP,HECTD1,RARRES2,FMOD,RPF2,TSPAN14,HTRA1,HIST1H1B,PYM1,SNW1,VRK1,GALNS,SF3B1,PPM1A,YWHAQ,GSTZ1,DHPS,AKAP8,MCM7,LAS1L,IRF2BPL,MRPL4,GBA,YWHAB,PHF6,GNG12,DLST,CKAP5,HSPA8,TCEA1,ITGA5,GTPBP4,ACTR10,SUPV3L1,USP10,SERPING1,SMC3,YARS2,SMPDL3B,F12,PCNA,F9,PSMA2,TRIR,EMILIN2,THRAP3,GNPNAT1,EIF4B,ATP6V1A,AGT,PEX5,ABLIM1,SAMD4B,PTPN12,SFXN3,PPIL1,ADAM10,SART3,ARHGAP1,PRKCD,ATP6V1C1,RHEB,HGH1,OL…
0.000905693052002688	ARRB1,FLNA,HSPA8,DDX50,SFPQ,YWHAB,HNRNPL,SRRM2,MRPS23,RBMX,HNRNPA3,DDX39B,VCP,SF3B2	NT5E,EFEMP2,RARRES2,LMOD1,PCOLCE,SLC25A3,ARRB1,FLNA,HSPA8,OLFML3,FMOD,PPA1,HSP90AB1,ANXA5,BTF3L4,DDX50,STIM1,CD2AP,AEBP1,SCO1,FOLR1,BCAM,KDM3B,IMPDH2,C12orf10,FAM114A2,WTAP,SFPQ,LUM,SLC9A3R1,RPL5,YWHAB,HNRNPL,VBP1,MYH11,PAPOLA,DCN,CFH,DNAJC2,TNC,PTGES3,HSPG2,PLS3,RBMXL1,WT1,MRPS9,BAG5,FBLIM1,SERPINF1,NUP43,SRSF7,RPS15,COL1A2,SRRM2,NOLC1,MRPS23,TTC37,ANXA6,PDE12,DRAP1,RBMX,CYB5R3,SPARC,VWF,HNRNPA3…
0.000276186474738907	SRRM2,PPP4R2,RBM25,APP,FLNA,DHPS,SF3A1,SNW1,CCT5,HNRNPU,DNAJC8,TMPO,PSMC1,SART1,SUB1	MRPS22,ABCF1,SRRM2,EIF2S2,SRSF3,CHERP,SLC25A20,PPP4R2,RBM25,ELOC,NUP153,MRPS35,PCNT,FUBP1,APP,FLNA,DHPS,PITRM1,PPIG,GUK1,UBE2V2,YTHDF3,RAN,ASNA1,HSPA14,SF3A1,PLXNB2,HMGN4,SNW1,RAB8A,CCT5,WTAP,NAXE,KHDRBS1,VPS26B,ZNF207,MAP2K2,BST1,DAP3,SREK1,CYB5B,WBP2,SRSF10,PRKAA1,REXO2,ISCU,RPS27,ZYX,HNRNPU,DNAJC8,SH3GLB1,TDRD7,TMPO,SRSF9,NT5DC1,ASCC3,GCN1,APAF1,PHPT1,KARS,ITGA3,STIM1,PSMC1,RRAS,AP1M2,PPP4R3A,…
4.9579060722779e-06	RNPS1,SNRPD2,HNRNPH3,HNRNPA2B1,RBM39,HSPA8,FIP1L1,MATN2,PRPF40A,SF3A1,YBX1,RPS13,SNRPC,SNRPB2,SRRM2,SF3B3,ILK,SF3B1	ZRANB2,RNPS1,FAM114A2,HIST1H1B,SNRPD2,HNRNPH3,SNRPG,HNRNPA2B1,PEX11B,C5orf51,NOLC1,RBM39,HBS1L,IK,HSPA8,ITIH2,FIP1L1,ITIH1,MATN2,HIP1,PRRC2C,SCYL2,OLFML1,PRPF40A,RBM14,SF3A1,ITGA5,TBL1XR1,RPL24,KTN1,RPL15,AHSA1,QSOX1,EMILIN2,GATAD2B,SF1,CD55,STAMBP,FBLN5,CACYBP,ZMAT2,TRAF6,PGD,BCLAF1,SRP54,YBX1,TXNDC17,RPS13,YWHAZ,SNRPC,VRK1,RPL4,POTEI,LTF,HSP90AA1,CUL1,SRSF7,ENY2,LMOD1,CCDC47,SNRPB2,SRRM2,OAT,KL…
0.00273802964099564	PRPF4B,SARNP,HNRNPA2B1,SNW1,CDC73,HNRNPA1,HNRNPU,CSNK2A1,U2AF1,HNRNPH1,MYL6,SRRM2,HNRNPC	PRPF4B,AFDN,SARNP,COL3A1,REXO2,SRSF3,RBMXL1,NUP43,KHDRBS1,RAN,HNRNPA2B1,RALY,MYH9,PABPC4,FBXO7,CKB,ZRANB2,CA1,SNRPG,SNW1,PLXNB2,PCBP2,PSMB5,RBP1,CDC73,EIF3M,HNRNPA1,SMNDC1,FUBP1,SRSF10,AATF,LIG3,NECAP2,NOP2,HSPA4,LMNB1,MXRA5,C19orf70,HNRNPU,RAB14,LUM,TMED3,ACTL6A,SRRT,COL5A2,PPP2R1A,RCC2,TMEM43,TRAFD1,CSNK2A1,ELANE,HMBS,NT5C3A,KDM3B,ADRM1,H2AFY,NPM1,FAP,ERP44,CLTC,U2AF1,CDK5,HNRNPH1,STMN1,LRRC47,…
4.72969834710495e-08	SNRPB2,SF3B4,HNRNPA2B1,ACIN1,SF3B2,HSPA8,MDK,RBM25,U2AF1,HNRNPU,SNRPA1,DHPS,HNRNPH1,FLNA,PRPF4B,RNPS1,U2AF2,HNRNPL,HNRNPC,BAG2,SRRM2	NOLC1,PCNA,PTGFRN,U2SURP,SOX17,SNRPB2,SF3B4,BST1,HNRNPA2B1,RPL28,SERBP1,DRAP1,RPL12,RPS14,RPL4,ACIN1,YY1,RPL24,ASPN,SMARCA5,RPL18,RPL15,KDELC2,SF3B2,SFXN3,HSPA8,MDK,SAP18,GFM1,TOP1,SLC25A3,RBM25,U2AF1,SMC2,CHERP,AMPD2,SRRT,AFDN,HNRNPU,NT5E,RHOT2,CAVIN1,SNRPA1,DEK,DHPS,NUP43,HNRNPH1,PDAP1,PDLIM4,WRNIP1,FLNA,SF3B6,C7,HNRNPAB,LIMS1,PRPF4B,NUCKS1,TPR,RPL17,CCDC58,RNPS1,RPL10A,U2AF2,RPS6,PARP4,HNRNPL,…
6.35239992953203e-05	SNW1,RBM25,SNRNP70,SRSF11,U2AF2,RBM39,SART1,RUVBL1,DDX46	RPS23,PCNP,ACIN1,NACA,DRAP1,SFXN1,UCHL5,RRAS,SNW1,SMARCA5,ILK,OLFML3,NRDC,C4BPA,RBM25,FGA,CCT8,UBTF,RAE1,ANKFY1,RPL8,PROS1,C8G,C1R,PARVA,C1S,BST1,LIG3,APOB,SNRNP70,HTATSF1,SRSF11,EIF2B1,PPP1R8,NUCKS1,EIF2S2,CRLF3,ATXN10,U2AF2,RBM39,SART1,RPL35,EFEMP1,PTBP1,RPL17,SRSF6,CSTF2T,ASPN,SFPQ,HNRNPA1,URB2,EIF3I,CSNK1A1,KTN1,DHCR7,ITGA5,ALYREF,LIMS1,PRCC,SCAMP3,CHTOP,ANP32E,RUVBL1,HMGB1,DPT,KCMF1,ZMAT2,SE…
0.00130303329113586	PDS5B,CALM1,SNW1	EEFSEC,HMGB1,SARNP,NOLC1,PDS5B,SORT1,GOLGB1,PROS1,KIF11,ACOX1,PSME1,RPL10,C4BPA,FNBP1L,TMX1,HMGN2,CHMP5,PSME2,MRPS22,SPAG9,YWHAZ,GALNT7,MYO6,RCN3,PPIF,CALM1,PTGES3,RPL8,NECAP2,SNRPC,GOLGA2,GTPBP4,SNW1,MGEA5,RPL35,PRDX1,GOLGA7,GMPR2,RPL36,CD109,TMA7,HMGB2,DNAJC8,ALDH4A1,RAB3GAP2,MAP4,C7,SAR1A,GALK1,RHOC,TRA2B,PCBP1,PSMA4,STX6,UBE2V2,RTCB,TNS3,CLEC3B,ARL8B,HTATIP2,CP,ANXA3,TMPO,MYLK,MCTS1,KCMF1,PCK…
0.00931389337093164	PPP2R1A,DSP,SCPEP1,G3BP2,PDIA4	SNX1,PPP2R1A,COPZ1,LAD1,EIF2B3,TRAM1,MYBBP1A,DSP,SCPEP1,MAGED2,ATP6V0A1,APRT,TAF6L,TNPO3,POLR3C,DNPH1,C1R,IPO4,MTX1,LPCAT1,PARK7,GORASP2,C1orf123,ATP5B,ANP32A,PSMD13,CUTA,PRPF4B,IFI30,STT3A,MCM4,TMX3,RBMXL1,ADAR,SYK,VWA1,MRPS31,DAG1,SURF4,FOLR1,MAP2K3,STAT2,CAST,ATP5J,EXOSC6,TXN2,ELOA,MCM3AP,FAM114A1,PRRC2A,HDGFL2,ME2,LAMC2,MDK,PROS1,SUCLA2,OXCT1,NAP1L1,VAMP7,STAT1,IPO9,CRLF3,STAG1,CRIP2,VIM,IDH1…
0.00345969652787314	CLINT1,SELENBP1,CUL3,DCUN1D1,UBE2M,TOP2A,ATP6V0A1	SNRNP200,CTSA,ADPGK,B2M,COX7A2,DUSP3,FIP1L1,HNRNPH3,HNRNPR,LBR,PUF60,SERPINB1,TNPO1,ITGB5,PTPN11,RRP1B,AKR7A2,NOC2L,ST13,AGO1,COG2,COL5A2,EPRS,LAMTOR1,SRP72,USP10,EPS8L2,TSR1,FHL2,WDR61,GNPNAT1,CLPB,GMPPB,NDUFA5,UBE2H,ARFGEF1,CLEC3B,PA2G4,URB2,CLINT1,PWP2,RPL35A,SSRP1,RPS12,SLC25A12,GBE1,HIST1H1A,NGLY1,LUM,GALNT1,GNA11,SELENBP1,MRE11,ACSF2,VIRMA,CDS2,FKBP3,POLD1,STAT2,VAC14,SSBP1,YAP1,ITGA3,CUL3,…
0.00267276633978063	TNS1,BRCC3,BABAM1	RBMXL1,PKN2,SP1,TMCO1,TNS1,RPS6KA3,PLOD1,SNAP23,CRIP2,BRCC3,ENY2,CHMP5,ZMAT2,PPP4R2,CCAR2,PIGT,CUTA,SCFD1,MTAP,RPE,UBR4,BOP1,PSMD2,NES,SELENBP1,ACAD8,GNB2,GTPBP4,RRS1,SFN,CAPZA1,CAPG,MFF,PSMA1,ANXA7,ABHD12,MDC1,GATD1,ANP32A,SLC27A1,TES,NECAP2,HIST1H3D,GLDC,PSMD6,ADNP,RBM22,CLPX,BST2,AHNAK,ATP6V1E1,CST3,HSPBP1,PURA,PITHD1,HMGN1,FKBP3,ERLEC1,THYN1,ST14,DERA,PIGK,EIF3D,COX6B1,TOP2A,GOSR1,MCCC1,SKP1,…
0.00743116892100929	HIST1H3D,TRIM28,STAT6	NASP,S100A1,RBBP7,LAMTOR5,NAA25,ITGA3,TRA2B,HMGB1,ZW10,AGO2,MSLN,DCTN4,SART3,PRKAA1,SMC2,SF3A3,LLGL1,ADIRF,PDS5B,BST2,CRNKL1,ATP6V0D1,RPL38,ERP29,SAMHD1,TTLL12,ARAP1,RAB5C,AHNAK,MROH1,A2M,FABP5,FLOT2,CCNY,NCAPD2,UPF2,ELP1,NTPCR,SLC25A3,MKI67,HPRT1,AK2,VASP,ACSL4,NPEPL1,MPV17,MPDU1,LTF,U2SURP,ALG1,TMEM43,NAT10,RAB7A,ALDH9A1,PRPF6,GSS,POGZ,SNAP23,HIST1H3D,TARDBP,UACA,STX6,RALY,CLUH,PSMC4,RPL5,CCAR2…
0.00743116892100929	NAP1L1,IFI16,TRIM25	APRT,CCT2,COPS6,SEPT11,POLDIP3,B2M,GPI,MFAP1,YWHAE,LRP1,PUF60,ST13,FIP1L1,RBP4,RPS5,PDIA5,LBR,VIRMA,PHGDH,ZW10,YWHAH,CD74,SNRPA1,RPS29,CPNE1,DUSP3,HNRNPR,SSRP1,HNRNPH3,PALM2-AKAP2,MCM5,IDH1,TBL1XR1,TIMP1,RPS12,DDX51,ARIH1,METTL7A,GTF2I,NAP1L1,NTMT1,SEC61B,PPP2R1A,PARK7,LPCAT1,ABCF2,SSBP1,RPL10,VDAC2,CHMP1A,PA2G4,RPL17,BCCIP,STMN1,HOOK1,PDIA6,IFI16,TNPO1,FKBP3,APEX1,ECI2,LAMTOR1,ENO2,RPS10,TAX1BP3…
0.00049412579988803	HSPA8,EFTUD2,PLEC,WNK1,FHL3,AAK1	ZC3H14,KIF13B,EIF5A,GBE1,METTL7A,PUDP,PPM1G,OLFML1,KRT18,SPART,RMDN1,PCBP2,RPS21,MRE11,CDH1,TOMM40,DSC2,ORM1,NUFIP2,OSBPL8,MRPL19,SPTAN1,LASP1,MOGS,ECHDC1,RBMXL1,POFUT1,DNAJC3,PSMA5,ANP32B,HSPA8,SAMD4B,MRPS17,SERPINA3,HIST2H3A,PLTP,GPC4,PAK4,FMOD,CNDP2,DDX23,USP39,C8A,GLYR1,NTMT1,EFTUD2,MRPL39,OGDH,SMARCB1,NASP,FLOT1,PLEC,PARD3,TPM2,RTN3,EPS15,EPB41L2,COX17,PSAP,CYFIP1,PPID,CCDC22,CNOT1,WNK1,MYCB…
0.00132797581287245	WBP11,POLR2A,THOC1,CSNK2A1	SMARCA4,DDX17,WBP11,DNAJC9,AAAS,ECM1,LUM,TCERG1,SEC24D,SYNE1,RIPK1,NUDC,TRA2B,HNRNPA2B1,SNRPC,SF3B3,PABPC4,SRSF5,HNRNPU,GMPS,NAE1,COL6A3,RPS21,TMED10,UCHL3,SRSF1,HSPA4,AGK,CAPRIN1,NT5E,TRMT61A,PROS1,VAMP7,DAXX,HNRNPA1,SLC25A3,PPBP,SART1,ACAD8,MCCC1,ATL3,DDX52,POLR2A,TMEM43,FAM114A2,KLK6,TECR,RBM28,GGCT,PECAM1,RBMX,THOC1,BRD4,PSMD8,RTN3,DNAJC2,TUBB6,CSNK2B,POTEI,SMARCC1,TBL3,COL5A1,PGM3,PICALM,VPS…
0.0046909948000581	DBN1,IQGAP1,TRIM25	PPIF,TRIR,NUP43,CRIP2,NECAP2,PCNP,TRMT1,RNPS1,DHPS,RPS17,KTN1,SOX17,PROS1,PSMA2,LXN,PGM3,HMGN1,ARL6IP1,DES,SUPT5H,RCN3,CS,CTCF,CSE1L,RPS28,DDX39A,ARMC10,HSP90AA1,NHP2,FAM114A2,F11R,HSPA4,ZC3H14,PFDN5,TMSB10,FLNC,ALDH7A1,ECHS1,UPF2,SF1,RBM12,HNRNPH1,NACA,SNRPC,STOM,RPS13,POTEI,DAD1,RPS23,SP1,HPRT1,EPB41L1,ECHDC1,MYH10,SNW1,RPL8,PUS1,CSNK2A2,DYNLL1,POLB,PSMA4,MDC1,ERGIC1,EDF1,ACADSB,APP,TRIM56,DBN1…
0.00504842541052256	DYNLL1,ILVBL,HNRNPL,SNRPE	STOM,PPP1R10,GLDC,AFDN,CCDC6,THRAP3,SARNP,DYNLL1,SSRP1,HNRNPA2B1,PECAM1,HOOK1,NIPBL,CHCHD2,HMGB2,PTGS1,ARID1A,ACIN1,CSE1L,ATPAF1,MGEA5,PUM1,PYCR1,ABAT,ILF3,RTF1,HLA-B,CSNK1A1,PCNP,FGA,RCC2,FGG,BRD4,MCCC2,SLC25A22,PEF1,ERLEC1,SLC25A3,BGN,PGM3,NOL9,PPIH,CS,BMP2K,MRPS28,ABCD3,RPAP3,RPS27,CRYL1,DDX42,ILVBL,C12orf10,ECHDC1,GRK2,GON7,SNRPC,C9,OCIAD2,TMA7,HNRNPL,JUP,ISOC2,RBMXL1,TOP2B,METTL26,PPT1,EIF4B…
0.00260483141834913	ZNF185,CDH1	S100A6,FAM3C,CLINT1,COL18A1,CD63,PDXK,NDUFAB1,S100A16,SLC25A1,CIB1,PACSIN2,TNXB,FBLN5,ACSF2,COPB1,WFDC2,TUBGCP2,AKR1C3,IQGAP1,TOMM40,CRIP2,COPB2,ILKAP,CUL4A,WNK1,AHNAK,EXOSC10,AIMP2,F12,APOA1,UBFD1,BST2,ARMC10,DDX3X,LRPAP1,CTSZ,OSBPL9,GFPT1,CAPNS1,NID1,SPTB,BANF1,MRPL1,CSTB,RAB18,TSR1,SURF4,MTA2,NIT1,ALDH7A1,DIS3L2,ZNF185,YWHAZ,KHSRP,SYNE2,XAB2,TRIM47,NUP58,AARS2,PSPC1,PNKP,CASK,KTN1,JUP,NPC2,S10…
